# Supplementary material for: Whole Blood Metabolite Profiles Reflect Changes in Energy Metabolism in Heart Failure
Source: Metabolites. 2022 Feb 27;12(3):216. doi: 10.3390/metabo12030216 (PMC8949022; doi:10.3390/metabo12030216)
Supplement: Supplementary file 1 [file metabolites-12-00216-s001.zip › Supplemental Tables.xlsx]

## Sheet: Description
Table S1	Description of the metabolite features available for analysis. Abbreviations, as well as full names, HMDB and PubChem identifiers are provided for every analyte. Additionally, general pathways for every metabolite and metabolite ration and percentage of zero ("0") values for both, LIFE-Adult and LIFE-Heart are provided.
Table S2	Study characteristics and data availability of LIFE-Adult and LIFE-Heart. For continuous variables, median and IQR are shown, for binary variables, absolute counts and percentages are given. Abbreviations: body mass index (BMI), high-density lipoprotein (HDL), low-density lipoprotein(LDL), N-terminal prohormone of brain natriuretic peptide (NT-proBNP), coronary artery disease (CAD). Utilization o…
Table S3	Summary statistics from an univariate and univariable association analysis with 97 metabolites as response variables and one of 31 ASCVD phenotypes as single predictors. Analyses were conducted seperately in the LIFE-Adult and LIFE-Heart studies. Each row represents one association. P-values were adjusted for multiple testing using a hierarchical adjustment procedure both on local (within phenoty…
Table S4	Summary statistics from an univariate and multivariable association analysis with 97 metabolites as response variables and one of 31 ASCVD phenotypes and 15 risk factors and confounders as predictors. Analyses were conducted seperately in the LIFE-Adult and LIFE-Heart studies. Each row represents one association. P-values were adjusted for multiple testing using a hierarchical adjustment procedur…
Table S5	Receiver-operating-characteristics (ROC) and respective areas under the curve (AUC) with corresponding 95% confidence intervals and estimated shrinkage parameter Lambda from each of ten cross validation (CV)-runs in the training and validation data set made up of two-thirds of LIFE-Heart participants (N=3,145). Statistics are shown for each of three models developed to predict significant stenosi…
Table S6	Model weights for each parameter of a linear predictor to predict significant stenosis in developed from data of the LIFE-Heart study. The model included nine classical risk factors and 92 metabolites and metabolite ratios.
Table S7	Model weights for each parameter of a linear predictor to predict significant stenosis in developed from data of the LIFE-Heart study. The model included nine classical risk factors.
Table S8	Model weights for each parameter of a linear predictor to predict significant stenosis in developed from data of the LIFE-Heart study. The model included 92 metabolites and metabolite ratios.
Table S9	Summary statistics of a univariate and multivariable association analysis of 145 gene expression probes, mapped to 91 genes annotated to the fatty acid oxidation and ketone body metabolism as response variables and one of 31 ASCVD phenotypes in addition to 15 risk factors and confounders as predictors. Analyses were conducted seperately in the LIFE-Adult and the LIFE-Heart studies..
Table S10	Summary statistics from an univariate and multivariable association analysis with ASCVD phenotypes as response variables and 15 risk factors and confounders as predictors. Analyses were conducted seperately in the LIFE-Adult and LIFE-Heart studies. P-values were adjusted for multiple testing using a hierarchical adjustment procedure both on local (within phenotypes) and on global (across phenotyp…

## Sheet: Table_S01
Metabolite Abbreviation	Full metabolite name	Metabolite Class	Metabolite Class 2	HMDB	PubChem	Metabolite Pathway	Metabolite Super Pathway	Zero-values in LIFE-Heart (%)	Zero-values in LIFE-Adult (%)
C0	Carnitine free	Acylcarnitine	Acylcarnitine	HMDB0000062	2724480	Carnitine transport	Carnitine transport	0	0
C10	Decanoylcarnitine	Acylcarnitine	Acylcarnitine	HMDB0000651	10245190	Medium chain fatty acid metabolism	Fatty acid metabolism	16	6
C10:1	Decenoylcarnitine	Acylcarnitine	Acylcarnitine	HMDB0013205	53481651	Medium chain fatty acid metabolism	Fatty acid metabolism	39	30
C12	Dodecanoylcarnitine	Acylcarnitine	Acylcarnitine	HMDB0002250	168381	Medium chain fatty acid metabolism	Fatty acid metabolism	22	16
C14	Myristoylcarnitine	Acylcarnitine	Acylcarnitine	HMDB0005066	53477791	Long chain fatty acid metabolism	Fatty acid metabolism	16	13
C14:1	Tetradecenoylcarnitine	Acylcarnitine	Acylcarnitine	HMDB02014/HMDB0013329	22833575/53481677	Long chain fatty acid metabolism	Fatty acid metabolism	32	27
C14OH	3-Hydroxy-tetradecanoylcarnitine	Acylcarnitine	Acylcarnitine	HMDB0061640	71464541	Long chain fatty acid metabolism	Fatty acid metabolism	66	70
C16	Palmitoylcarnitine	Acylcarnitine	Acylcarnitine	HMDB0000222	11953816	Long chain fatty acid metabolism	Fatty acid metabolism	0	0
C16:1	Hexadecenoylcarnitine	Acylcarnitine	Acylcarnitine	HMDB0013207	53481653	Long chain fatty acid metabolism	Fatty acid metabolism	26	27
C16:1OH	3-Hydroxy-hexadecenoylcarnitine	Acylcarnitine	Acylcarnitine	HMDB0013333	53481685	Long chain fatty acid metabolism	Fatty acid metabolism	42	40
C16OH	3-Hydroxy-hexadecanoylcarnitine	Acylcarnitine	Acylcarnitine	HMDB0013336	53481691	Long chain fatty acid metabolism	Fatty acid metabolism	72	72
C18	Stearoylcarnitine	Acylcarnitine	Acylcarnitine	HMDB0000848	6426855	Long chain fatty acid metabolism	Fatty acid metabolism	0	0
C18:1	Octadecenoylcarnitine	Acylcarnitine	Acylcarnitine	HMDB0094687	87076413	Long chain fatty acid metabolism	Fatty acid metabolism	0	0
C18:1OH	Hydroxy-octadec-1-enoylcarnitine	Acylcarnitine	Acylcarnitine	HMDB0013339	53481697	Long chain fatty acid metabolism	Fatty acid metabolism	71	72
C18:2	Trans,trans-9,12-octadecadienoic acid (Linoelaidic)	Acylcarnitine	Acylcarnitine	HMDB0006469/HMDB0006461	6450015/53477834	Long chain fatty acid metabolism	Fatty acid metabolism	5	4
C18:2OH	3-Hydroxylinoleoylcarnitine	Acylcarnitine	Acylcarnitine	-	71464556	Long chain fatty acid metabolism	Fatty acid metabolism	75	72
C18OH	3-Hydroxy-octadecanoylcarnitine	Acylcarnitine	Acylcarnitine	HMDB0013154	53481632	Long chain fatty acid metabolism	Fatty acid metabolism	84	82
C2	Acetylcarnitine	Acylcarnitine	Acylcarnitine	HMDB0000201	7045767	Energy metabolism	Energy metabolism	0	0
C20:1	Cis-11-eicosenoic acid	Acylcarnitine	Acylcarnitine	HMDB0002231	5282768	PUFA metabolism	Fatty acid metabolism	44	40
C20:2	Cis-11,14-eicosadienoic acid	Acylcarnitine	Acylcarnitine	HMDB0005060	6439848	PUFA metabolism	Fatty acid metabolism	55	53
C20:3	Cis-11,14,17-eicosatrienoic acid	Acylcarnitine	Acylcarnitine	-	77174731	PUFA metabolism	Fatty acid metabolism	74	77
C3	Propionylcarnitine	Acylcarnitine	Acylcarnitine	HMDB00824	107738	Isoleucine metabolism, Valine metabolism	BCAA metabolism	0	0
C3DC	Malonylcarnitine	Acylcarnitine	Acylcarnitine	HMDB02095	22833583	Energy metabolism, Fatty acid synthesis	BCAA metabolism	37	30
C4	Butyrylcarnitine	Acylcarnitine	Acylcarnitine	HMDB02013	439829	Short chain fatty acid metabolism	Energy metabolism	7	9
C4OH	3-Hydroxy-butyryl-carnitine	Acylcarnitine	Acylcarnitine	HMDB0013127	71464477	Energy metabolism	Energy metabolism	22	26
C5	Isovalerylcarnitine	Acylcarnitine	Acylcarnitine	HMDB0000688	6426851	Leucine metabolism	BCAA metabolism	12	13
C5:1	Tiglylcarnitine	Acylcarnitine	Acylcarnitine	HMDB0002366	91825636	Isoleucine metabolism, Valine metabolism	BCAA metabolism	63	59
C5OH+HMG	2-Hydroxyisovalerylcarnitine	Acylcarnitine	Acylcarnitine	HMDB0062555	57357187	Leucine metabolism	BCAA metabolism	4	4
C6	Hexanoylcarnitine	Acylcarnitine	Acylcarnitine	HMDB0000705	6426853	Medium chain fatty acid metabolism	Fatty acid metabolism	31	30
C6DC	Adipoylcarnitine	Acylcarnitine	Acylcarnitine	HMDB0061677	71296139	Keton body generation from beta oxidation and ketogenic amino acids	Fatty acid metabolism	62	58
C8	Octanoylcarnitine	Acylcarnitine	Acylcarnitine	HMDB00791	11953814	Medium chain fatty acid metabolism	Fatty acid metabolism	20	13
C8:1	Octenoylcarnitine	Acylcarnitine	Acylcarnitine	-	71464472	Medium chain fatty acid metabolism	Fatty acid metabolism	28	23
Glut	Glutarylcarnitine	Acylcarnitine	Acylcarnitine	HMDB0013130	71317118	Lysine metabolism, Thryptophan metabolism, Beta-oxidation	Amino acid metabolism, other	41	32
MeGlut	3-Methylglutarylcarnitine	Acylcarnitine	Acylcarnitine	HMDB0000552	128145	Leucine metabolism	Amino acid metabolism, other	62	58
MMA	Methylmalonylcarnitine	Acylcarnitine	Acylcarnitine	HMDB0013133	53481628	Valine metabolism, Vitamine B12 metabolism	BCAA metabolism	2	1
AC-total	Acylcarnitine total	Acylcarnitine	Acylcarnitine	-	-	Carnitine transport	Carnitine transport	0	0
Aba	Aminobutyric acid	Amino Acid	Amino Acid	HMDB0000112	119	GABA, AABA	Other	0	0
Ala	Alanine	Amino Acid	Amino Acid	HMDB0000161	5950	Muscle metabolism, Ammonia-carrier, Glucose metabolism	Urea cycle	0	0
Arg	Arginine	Amino Acid	Amino Acid	HMDB0000517	6322	Urea cycle, NO metabolism	Urea cycle	0	0
Asn	L-Asparagine	Amino Acid	Amino Acid	HMDB0000168	6267		Other	1	7
Asp	Aspartic acid	Amino Acid	Amino Acid	HMDB0000191	5960	Amino group recycling	Ammonia recycling	0	0
Carn	Carnosine	Amino Acid	Amino Acid	HMDB0000033	439224	Histidine metabolism, Beta-alanine metabolism	Amino acid metabolism, other	39	63
Cit	Citrulline	Amino Acid	Amino Acid	HMDB0000904	9750	Urea cycle, NO metabolism	Urea cycle	0	0
Gln	Glutamine	Amino Acid	Amino Acid	HMDB0000641	5961	Amino group recycling	Ammonia recycling	0	0
Glu	Glutamic acid	Amino Acid	Amino Acid	HMDB0000148	33032	Amino group recycling, GABA production	Ammonia recycling	0	0
Gly	Glycine	Amino Acid	Amino Acid	HMDB0000123	750	Serin katabolism, brain function, purine synthesis, porphyrin synthesis	Ammonia recycling	0	0
His	Histidine	Amino Acid	Amino Acid	HMDB0000177	6274	Histamine precorsor, Carnosin precursor	Amino acid metabolism, other	0	0
Leu|Ile	Leucine|Isoleucine	Amino Acid	Amino Acid	HMDB00687/HMDB0000172	6106/6306	Leucine metabolsim, Isoleucine metabolism	BCAA metabolism	0	0
Lys	Lysine	Amino Acid	Amino Acid	HMDB0000182	5962	Carnitine precursor, collagen, glutamate generation	Amino acid metabolism, other	0	0
MeHis	Methylhistidine	Amino Acid	Amino Acid	HMDB0000001	92105	Histidine metabolism	Amino acid metabolism, other	0	0
Met	Methionine	Amino Acid	Amino Acid	HMDB0000696	6137	Cytosolic methyl group transfer, intermediate in the biosynthesis of cysteine, carnitine, taurine, lecithin, phosphatidylcholine, and other phospholipids	Amino acid metabolism, other	0	1
OH-Prol	Hydroxyproline	Amino Acid	Amino Acid	HMDB0000725	5810	Collagen synthesis	Collagen synthesis	0	0
Orn	Ornithine	Amino Acid	Amino Acid	HMDB0000214	6262	Urea cycle	Urea cycle	0	0
Phe	Phenylalanine	Amino Acid	Amino Acid	HMDB0000159	6140	Dopamine precursor	Amino acid metabolism, other	0	0
PiPA	Pipecolic acid	Amino Acid	Amino Acid	HMDB0000070	849	Peroxisomal metabolism, Lysine degradation	Amino acid metabolism, other	0	0
Pro	Proline	Amino Acid	Amino Acid	HMDB0000162	145742	Collagen synthesis	Collagen synthesis	0	0
Sarc	Sarcosine	Amino Acid	Amino Acid	HMDB0000271	1088	Glycine katabolism	Amino acid metabolism, other	0	0
Ser	Serine	Amino Acid	Amino Acid	HMDB0000187	5951	Glycine formation	Ammonia recycling	0	0
Tau	Taurine	Amino Acid	Amino Acid	HMDB0000251	1123	Cystein metabolism, bile acid generation	Amino acid metabolism, other	0	0
Thr	Threonine	Amino Acid	Amino Acid	HMDB0000167	6288	Glycine precursor, Serine precursor	Amino acid metabolism, other	0	0
Trp	Tryptophan	Amino Acid	Amino Acid	HMDB0000929	6305	Serotonine precursor	Amino acid metabolism, other	0	0
Tyr	Tyrosine	Amino Acid	Amino Acid	HMDB0000158	6057	Dopamine precursor	Amino acid metabolism, other	0	0
Val	Valine	Amino Acid	Amino Acid	HMDB0000883	6287	Valine metabolism	BCAA metabolism	0	0
Q1:(Val+Leu|Ile)/(Phe+Tyr)	(Valine + Leucine|Isoleucine) / (Phenylalanine + Tyrosine)	Amino Acid	Quotient			Phenylalanine and tyrosine metabolism	BCAA metabolism	0	0
Q2:C16/C2	Palmitoylcarnitine / Acetylcarnitine	Acylcarnitine	Quotient			CPTI, CPTII, Beta-oxidation	Energy metabolism	0	0
Q3:(C16+C18:1)/C2	(Palmitoylcarnitine + Octadecenoylcarnitine) / Acetylcarnitine	Acylcarnitine	Quotient			CPTI, CPTII, Beta-oxidation	Energy metabolism	0	0
Q4:C0/(C16+C18)	Carnitine free / Palmitoylcarnitine + Stearoylcarnitine	Acylcarnitine	Quotient			Carnitine transport	Energy metabolism	0	0
Q5:Gln/Glu	Glutamine / Glutamic acid	Amino Acid	Quotient			Glutamate precursor of glutamine	Ammonia recycling	0	0
Q6:Glut/Lys	Glutarylcarnitine / Lysine	Mix Quotient	Quotient			Lysine metabolism, Beta-oxidation	Amino acid metabolism, other	41	32
Q8:Pro/(OH-Prol)	Proline / Hydroxyproline	Amino Acid	Quotient			Collagen synthesis	Collagen synthesis	0	0
Q9:Lys/PiPA	Lysine / Pipecolic acid	Amino Acid	Quotient			Lysine degradation	Amino acid metabolism, other	0	0
Q11:Ala/C2	Alanine / Acetylcarnitine	Mix Quotient	Quotient			Glucose metabolism	Energy metabolism	0	0
Q12:Ala/Asp	Alanine / Aspartic acid	Amino Acid	Quotient			Muscle energy, Glucose metabolism	Energy metabolism	0	0
Q13:Arg/Cit	Arginine / Citrulline	Amino Acid	Quotient			Urea cycle	Urea cycle	0	0
Q14:Arg/Orn	Arginine / Ornithine	Amino Acid	Quotient			Urea cycle	Urea cycle	0	0
Q15:Arg/Gly	Arginine / Glycine	Amino Acid	Quotient			Ammonia recycling	Urea cycle	0	0
Q16:Asp/Cit	Aspartic acid / Citrulline	Amino Acid	Quotient			Ammonia recycling	Ammonia recycling	0	0
Q17:Glu/Pro	Glutamic acid / Proline	Amino Acid	Quotient			Glutamate precursor of proline biosynthesis	Collagen synthesis	0	0
Q18:(C5:1)/(Leu|Ile)	Triglylcarnitine / Leucine|Isoleucine	Mix Quotient	Quotient			Isoleucine metabolism	BCAA metabolism	63	59
Q19:(Leu|Ile)/C3	Leucine|Isoleucine / Propionylcarnitine	Mix Quotient	Quotient			Isoleucine metabolism, Valine metabolism	BCAA metabolism	0	0
Q20:C5/(Leu|Ile)	Isovalerylcarnitine / Leucine|Isoleucine	Mix Quotient	Quotient			Leucine metabolism	BCAA metabolism	12	13
Q21:(C5OH+HMG)/(Leu|Ile)	2-Hydroxyisovalerylcarnitine / Leucine|Isoleucine	Mix Quotient	Quotient			Leucine metabolism	BCAA metabolism	4	4
Q22:Met/Ser	Methionine / Serine	Amino Acid	Quotient			Folic acid cycle	Folic acid cycle	0	1
Q23:Met/Gly	Methionine / Glycine	Amino Acid	Quotient			Cytosolic methyl group transfer	Amino acid metabolism, other	0	1
Q24:Met/Tau	Methionine / Taurine	Amino Acid	Quotient			Taurine synthesis	Amino acid metabolism, other	0	1
Q25:Pro/Orn	Proline / Ornithine	Amino Acid	Quotient			Glutamate precursor of ornitine biosynthesis	Collagen synthesis	0	0
Q26:Glu/Orn	Glutamic acid / Ornithine	Amino Acid	Quotient			Ammonia recycling	Ammonia recycling	0	0
Q27:Sarc/Gly	Sarcosine / Glycine	Amino Acid	Quotient			Glycine metabolism	Amino acid metabolism, other	0	0
Q28:Ser/Gly	Serine / Glycine	Amino Acid	Quotient			Folic acid cycle	Folic acid cycle	0	0
Q30:Phe/Tyr	Phenylalanine / Tyrosine	Amino Acid	Quotient			Phenylalanine and tyrosine metabolism	Amino acid metabolism, other	0	0
Q32:C4OH/Val	3-Hydroxy-(iso)butyryl-carnitine / Valine	Mix Quotient	Quotient			Valin metabolism	BCAA metabolism	22	26
Q33:C0/(AC-total)	Carnitine free / Acylcarnitine total	Acylcarnitine	Quotient			Carnitine transport, Beta-oxidation	Energy metabolism	0	0
Q34:Asp/C2	Aspartic acid / Acetylcarnitine	Mix Quotient	Quotient			Ammonia recycling	Ammonia recycling	0	0
Q35:C5/C4	Isovalerylcarnitine / Butyrylcarnitine	Acylcarnitine	Quotient			Leucine metabolism	Energy metabolism	9	9
Q36:C8/C10	Octanoylcarnitine / Decanoylcarnitine	Acylcarnitine	Quotient			MCAD, Beta-oxidation	Energy metabolism	12	10
Q37:(C14:1)/C14	Tetradecenoylcarnitine / Myristoylcarnitine	Acylcarnitine	Quotient			VLCAD, Beta-oxidation	Energy metabolism	23	20
Q38:MMA/C3	Methylmalonylcarnitine / Propionylcarnitine	Acylcarnitine	Quotient			Isoleucine metabolism, Valine metabolism	BCAA metabolism	1	1

## Sheet: Table_S02
Variable Type	Term	LIFE-Heart	LIFE-Adult
	Area of collection	Leipzig, Germany	Leipzig, Germany
	N	5860	9646
ASCVD phenotype	Ankle brachial index	1.1 [1.03-1.17]	1.08 [1.01-1.16]
Risk factors and confounders	Age (years)	63.43 [54.7-71.9]	57.94 [47.7-68.2]
ASCVD phenotype	Brachial-ankle pulse wave velocity	-	11.9 [10.6-13.5]
Risk factors and confounders	Basophils (%)	0.3 [0.2-0.5]	0.6 [0.4-0.8]
ASCVD phenotype	Brachial-femoral pulse wave velocity	-	16.3 [13.2-21.2]
Risk factors and confounders	BMI (kg/m²)	28.4 [25.7-31.7]	26.59 [23.9-30]
Risk factors and confounders	Blood pressure (diastolic)	80 [72-89]	75 [68.5-81.5]
Risk factors and confounders	Blood pressure (systolic)	137 [124-151]	127 [117-138]
ASCVD phenotype	Number of vessel disease (50% stenosis)	1 [0.5-2]	-
ASCVD phenotype	carotid-femoral pulse wave velocity	-	9.9 [8.4-11.8]
Risk factors and confounders	HDL-Cholesterol (mmol/l)	1.21 [1.01-1.48]	1.57 [1.28-1.9]
Risk factors and confounders	LDL-Cholesterol (mmol/l)	3.07 [2.4-3.79]	3.44 [2.84-4.11]
Risk factors and confounders	Cholesterol (mmol/l)	5.08 [4.3-5.92]	5.52 [4.85-6.27]
ASCVD phenotype	Carotid intima media thickness	0.78 [0.675-0.89]	0.72 [0.63-0.84]
ASCVD phenotype	Aortic bulb (mm)	32 [29-35]	-
ASCVD phenotype	Deceleration time (ms)	232 [188-287]	-
ASCVD phenotype	End-diastolic volume (biplane, ml)	89 [73-114]	-
ASCVD phenotype	Ejection Fraction (biplane, %)	60 [54-64]	-
ASCVD phenotype	Ejection Fraction (%)	60 [53-66]	-
ASCVD phenotype	E point-septal separation (mm)	5 [3-7]	-
ASCVD phenotype	End-systolic volume (biplane, ml)	35 [27-47]	-
ASCVD phenotype	Flow Propagation Velocity (cm/s)	49 [38-65]	-
ASCVD phenotype	Fractional shortening (%)	32 [25-37]	-
ASCVD phenotype	Left ventricular mass (g)	217 [177-264]	-
ASCVD phenotype	Left ventricular function	1 [0-2]	-
ASCVD phenotype	Left ventricular internal diameter end diastole	48 [44-53]	-
ASCVD phenotype	Left ventricular internal diameter end systole	32 [29-38]	-
ASCVD phenotype	Back wall (M-mode, mm)	12 [10-13]	-
ASCVD phenotype	Pulmonary venous flow diastolic (cm/s)	45 [38-56]	-
ASCVD phenotype	Pulmonary venous flow systolic (cm/s)	60 [47-71]	-
ASCVD phenotype	Septum (mm)	12 [11-14]	-
ASCVD phenotype	Tricuspid annular plane systolic excursion (mm)	21 [19-23]	-
Risk factors and confounders	Eosinophils (%)	1.5 [0.8-2.6]	2.4 [1.6-3.6]
Risk factors and confounders	Fasting hours (hours)	3 [1.75-12.1]	12 [11-14]
Risk factors and confounders	Hematocrit (%)	0.42 [0.39-0.44]	0.41 [0.392-0.436]
Risk factors and confounders	Blood hemoglobin (mmol/l)	8.8 [8.1-9.4]	8.7 [8.2-9.3]
Risk factors and confounders	Leucocytes (10^9/l)	7.7 [6.3-9.7]	5.9 [5-7.1]
Risk factors and confounders	Lymphocytes (%)	22.7 [17-28.3]	30.2 [25-35.4]
Risk factors and confounders	Monocytes (%)	8.5 [7.1-10.1]	8 [6.8-9.4]
Risk factors and confounders	Neutrophils (%)	66.1 [59.6-72.4]	57.6 [52-63.3]
ASCVD phenotype	NT-proBNP (pg/ml)	351.6 [104-1350]	65.6 [35.7-121]
ASCVD phenotype	Number of plaques	1 [0-2]	0 [0-1]
Risk factors and confounders	Platelets (10^9/l)	229 [193-270]	237 [204-275]
Risk factors and confounders	Pulse pressure	55 [45-67]	51 [44-60]
Risk factors and confounders	Erythrocytes (10^12/l)	4.67 [4.34-4.97]	4.66 [4.39-4.94]
Risk factors and confounders	Reticulocytes (per 1000)	12.6 [10.1-15.6]	12 [9.6-14.8]
Risk factors and confounders	Triglycerides (mmol/l)	1.58 [1.14-2.25]	1.17 [0.84-1.65]
Risk factors and confounders	Waist-to-hip ratio	0.98 [0.911-1.04]	0.93 [0.864-0.994]
ASCVD phenotype	Peripheral artery disease	355 (5.1%)	477 (4.8%)
Risk factors and confounders	Lipid modifying agents (yes/no)	2939 (42%)	1339 (13.4%)
Risk factors and confounders	Sex hormones (yes/no)	55 (0.8%)	785 (7.8%)
ASCVD phenotype	Main stem stenosis	897 (12.8%)	-
ASCVD phenotype	CAD score	4909 (70.2%)	-
ASCVD phenotype	Valvular disease	355 (5.1%)	-
Risk factors and confounders	Hyptertension	6212 (88.8%)	4914 (49.1%)
ASCVD phenotype	Any plaques	2115 (30.2%)	4046 (40.5%)
Risk factors and confounders	Sex (female/male)	1969 (28.1%)	5234 (52.3%)
Risk factors and confounders	Smoking status (current or previous/never)	1798 (25.7%)	2105 (21%)
Risk factors and confounders	Diabetes medication (yes/no)	1628 (23.3%)	906 (9.1%)
Risk factors and confounders	HBa1c (%)	1250 (17.9%)	389 (3.9%)
Risk factors and confounders	Self-reported diabetes (yes/no)	1976 (28.2%)	1080 (10.8%)
Risk factors and confounders	Diabetes status (yes/no)	2174 (31.1%)	1180 (11.8%)

## Sheet: Table_S03
Study	N	Metabolite	ASCVD_Phenotype	Effect_Estimate	Standard_Error	Test_Statistic	Model_R_squared	P_Value	Local_FDR	Global_FDR	Hierarchical_FDR=5%_Significant
LIFE-Heart	3039	C0	Ankle brachial index	-0.0483513	0.0126661	-3.81736	0.00477533	0.000137578	0.000199488	5.83384e-22	TRUE
LIFE-Adult	8682	C0	Ankle brachial index	-0.0186505	0.0100518	-1.85544	0.000396462	0.0635673	0.0635673	5.8726e-67	FALSE
LIFE-Adult	8577	C0	Brachial-ankle pulse wave velocity	0.147875	0.00880015	16.8037	0.031879	2.26689e-62	1.0201e-61	5.8726e-67	TRUE
LIFE-Adult	3935	C0	Brachial-femoral pulse wave velocity	0.0555749	0.0132749	4.18648	0.00443653	2.89513e-05	3.72231e-05	5.8726e-67	TRUE
LIFE-Heart	5749	C0	Number of vessel disease (50% stenosis)	0.0701347	0.0112049	6.2593	0.0067711	4.14693e-10	1.09328e-09	5.83384e-22	TRUE
LIFE-Adult	8197	C0	carotid-femoral pulse wave velocity	0.0568284	0.0090952	6.24817	0.00474125	4.36011e-10	7.84819e-10	5.8726e-67	TRUE
LIFE-Heart	2970	C0	Carotid intima media thickness	0.0568862	0.0164705	3.45381	0.00400306	0.000560459	0.000706665	5.83384e-22	TRUE
LIFE-Adult	9314	C0	Carotid intima media thickness	0.129132	0.00857791	15.054	0.0237584	1.278e-50	2.8755e-50	5.8726e-67	TRUE
LIFE-Heart	4701	C0	Aortic bulb (mm)	0.0786602	0.0129609	6.06903	0.00777755	1.38798e-09	3.35428e-09	5.83384e-22	TRUE
LIFE-Heart	1537	C0	Deceleration time (ms)	-0.00859531	0.0228322	-0.376455	9.23163e-05	0.70663	0.726303	5.83384e-22	FALSE
LIFE-Heart	971	C0	End-diastolic volume (biplane, ml)	0.0972456	0.028029	3.46947	0.0122699	0.000544458	0.000706665	5.83384e-22	TRUE
LIFE-Heart	1134	C0	Ejection Fraction (biplane, %)	-0.107303	0.0261503	-4.10332	0.0146559	4.36458e-05	6.66173e-05	5.83384e-22	TRUE
LIFE-Heart	1317	C0	Ejection Fraction (%)	-0.0502429	0.0242658	-2.07052	0.00324953	0.0385982	0.0430519	5.83384e-22	TRUE
LIFE-Heart	431	C0	E point-septal separation (mm)	0.0151951	0.0433801	0.350277	0.000285918	0.726303	0.726303	5.83384e-22	FALSE
LIFE-Heart	977	C0	End-systolic volume (biplane, ml)	0.0944056	0.0280218	3.369	0.0115073	0.000783954	0.000947277	5.83384e-22	TRUE
LIFE-Heart	1111	C0	Flow Propagation Velocity (cm/s)	0.016278	0.0271681	0.599158	0.000323602	0.54919	0.589871	5.83384e-22	FALSE
LIFE-Heart	4171	C0	Fractional shortening (%)	-0.0743945	0.0137851	-5.39675	0.0069376	7.16293e-08	1.48375e-07	5.83384e-22	TRUE
LIFE-Heart	977	C0	Left ventricular mass (g)	0.155936	0.0279099	5.58712	0.031023	2.99485e-08	6.68081e-08	5.83384e-22	TRUE
LIFE-Heart	2491	C0	Left ventricular function	0.124101	0.019278	6.43742	0.0163768	1.45307e-10	4.21391e-10	5.83384e-22	TRUE
LIFE-Heart	5347	C0	Left ventricular internal diameter end diastole	0.0975181	0.0121673	8.01476	0.0118753	1.34431e-15	9.74624e-15	5.83384e-22	TRUE
LIFE-Heart	4182	C0	Left ventricular internal diameter end systole	0.123472	0.0136877	9.02065	0.0190953	2.79086e-19	4.04675e-18	5.83384e-22	TRUE
LIFE-Heart	4683	C0	Back wall (M-mode, mm)	0.0965035	0.0129979	7.42457	0.0116391	1.3369e-13	6.46166e-13	5.83384e-22	TRUE
LIFE-Heart	1318	C0	Pulmonary venous flow diastolic (cm/s)	0.0859675	0.024756	3.4726	0.00908011	0.000532163	0.000706665	5.83384e-22	TRUE
LIFE-Heart	1318	C0	Pulmonary venous flow systolic (cm/s)	-0.0566186	0.0248259	-2.28063	0.00393676	0.0227299	0.0263667	5.83384e-22	TRUE
LIFE-Heart	5452	C0	Septum (mm)	0.0937754	0.0120455	7.78509	0.0109984	8.28e-15	4.8024e-14	5.83384e-22	TRUE
LIFE-Heart	2399	C0	Tricuspid annular plane systolic excursion (mm)	-0.0962179	0.0182421	-5.2745	0.0114731	1.45046e-07	2.62895e-07	5.83384e-22	TRUE
LIFE-Heart	5855	C0	NT-proBNP (pg/ml)	0.108997	0.0106707	10.2146	0.0175143	2.72414e-24	7.89999e-23	5.83384e-22	TRUE
LIFE-Adult	9620	C0	NT-proBNP (pg/ml)	0.0350947	0.0133059	2.63752	0.00072276	0.00836479	0.00941039	5.8726e-67	TRUE
LIFE-Heart	3040	C0	Number of plaques	0.0961712	0.0118166	8.13867	0.0213379	5.76623e-16	5.57402e-15	5.83384e-22	TRUE
LIFE-Adult	9234	C0	Number of plaques	0.143238	0.00807835	17.7311	0.0329329	3.36346e-69	3.02711e-68	5.8726e-67	TRUE
LIFE-Heart	3099	C0	Peripheral artery disease	0.276827	0.0517024	5.35424	0.00917177	9.21893e-08	1.78233e-07	5.83384e-22	TRUE
LIFE-Adult	8720	C0	Peripheral artery disease	0.205655	0.0397632	5.172	0.00305894	2.36745e-07	3.55117e-07	5.8726e-67	TRUE
LIFE-Heart	5860	C0	Main stem stenosis	0.193968	0.044804	4.32926	0.00318926	1.52108e-05	2.45062e-05	5.83384e-22	TRUE
LIFE-Heart	5749	C0	CAD score	0.116507	0.0253623	4.59371	0.00365842	4.44739e-06	7.58673e-06	5.83384e-22	TRUE
LIFE-Heart	5686	C0	Valvular disease	0.352202	0.0540763	6.51305	0.00740774	7.99666e-11	2.5767e-10	5.83384e-22	TRUE
LIFE-Heart	3040	C0	Any plaques	0.232585	0.0333235	6.97961	0.0157821	3.61946e-12	1.49949e-11	5.83384e-22	TRUE
LIFE-Adult	9234	C0	Any plaques	0.28728	0.0172203	16.6826	0.029264	1.39125e-61	4.17375e-61	5.8726e-67	TRUE
LIFE-Heart	3039	C10	Ankle brachial index	-0.0571984	0.0123072	-4.64754	0.00706194	3.50221e-06	3.38547e-05	3.24908e-10	TRUE
LIFE-Adult	8685	C10	Ankle brachial index	-0.00607709	0.0111537	-0.544852	3.41879e-05	0.585869	0.585869	1.48531e-29	FALSE
LIFE-Adult	8580	C10	Brachial-ankle pulse wave velocity	0.114765	0.00986509	11.6334	0.0155321	4.76387e-31	4.28748e-30	1.48531e-29	TRUE
LIFE-Adult	3935	C10	Brachial-femoral pulse wave velocity	0.051882	0.0144555	3.58909	0.00326456	0.00033588	0.000431846	1.48531e-29	TRUE
LIFE-Heart	5749	C10	Number of vessel disease (50% stenosis)	0.0512786	0.0109123	4.69914	0.00382763	2.67353e-06	3.38547e-05	3.24908e-10	TRUE
LIFE-Adult	8200	C10	carotid-femoral pulse wave velocity	0.0716393	0.0101727	7.04228	0.00601311	2.04398e-12	4.59896e-12	1.48531e-29	TRUE
LIFE-Heart	2970	C10	Carotid intima media thickness	0.0305767	0.0160635	1.90348	0.00121928	0.0570743	0.110344	3.24908e-10	FALSE
LIFE-Adult	9317	C10	Carotid intima media thickness	0.0608948	0.00961585	6.33275	0.00428683	2.51955e-10	3.77933e-10	1.48531e-29	TRUE
LIFE-Heart	4701	C10	Aortic bulb (mm)	-0.0034985	0.0127812	-0.273722	1.59443e-05	0.78431	0.78431	3.24908e-10	FALSE
LIFE-Heart	1537	C10	Deceleration time (ms)	-0.0114777	0.0218667	-0.524892	0.000179454	0.599734	0.645009	3.24908e-10	FALSE
LIFE-Heart	971	C10	End-diastolic volume (biplane, ml)	-0.0284763	0.0286902	-0.992545	0.00101563	0.321179	0.443534	3.24908e-10	FALSE
LIFE-Heart	1134	C10	Ejection Fraction (biplane, %)	-0.0239356	0.0266943	-0.896657	0.000709738	0.370092	0.487849	3.24908e-10	FALSE
LIFE-Heart	1317	C10	Ejection Fraction (%)	-0.0125629	0.0239855	-0.523771	0.000208577	0.600526	0.645009	3.24908e-10	FALSE
LIFE-Heart	431	C10	E point-septal separation (mm)	0.061097	0.0440275	1.3877	0.00446879	0.165948	0.267361	3.24908e-10	FALSE
LIFE-Heart	977	C10	End-systolic volume (biplane, ml)	-0.0170205	0.0286671	-0.593732	0.000361426	0.552829	0.641282	3.24908e-10	FALSE
LIFE-Heart	1111	C10	Flow Propagation Velocity (cm/s)	-0.0105538	0.0259	-0.407483	0.0001497	0.683732	0.708151	3.24908e-10	FALSE
LIFE-Heart	4171	C10	Fractional shortening (%)	-0.0274517	0.0134985	-2.03369	0.000991072	0.0420465	0.093796	3.24908e-10	FALSE
LIFE-Heart	977	C10	Left ventricular mass (g)	-0.0493613	0.0281978	-1.75054	0.00313311	0.08034	0.145616	3.24908e-10	FALSE
LIFE-Heart	2491	C10	Left ventricular function	0.0576996	0.0189371	3.04692	0.00371603	0.0023363	0.0084691	3.24908e-10	TRUE
LIFE-Heart	5347	C10	Left ventricular internal diameter end diastole	0.00824786	0.0118956	0.693357	8.99346e-05	0.488116	0.589807	3.24908e-10	FALSE
LIFE-Heart	4182	C10	Left ventricular internal diameter end systole	0.0167988	0.0134551	1.24851	0.000372773	0.211915	0.323449	3.24908e-10	FALSE
LIFE-Heart	4683	C10	Back wall (M-mode, mm)	0.0135177	0.0127317	1.06173	0.000240762	0.288411	0.418196	3.24908e-10	FALSE
LIFE-Heart	1318	C10	Pulmonary venous flow diastolic (cm/s)	0.0559832	0.0238498	2.34732	0.0041694	0.0190566	0.0502401	3.24908e-10	FALSE
LIFE-Heart	1318	C10	Pulmonary venous flow systolic (cm/s)	0.0187377	0.0239002	0.784	0.000466846	0.433181	0.546185	3.24908e-10	FALSE
LIFE-Heart	5452	C10	Septum (mm)	0.0184405	0.0117922	1.56379	0.000448501	0.117926	0.201168	3.24908e-10	FALSE
LIFE-Heart	2399	C10	Tricuspid annular plane systolic excursion (mm)	-0.0581736	0.0181389	-3.20712	0.00427271	0.00135836	0.00656541	3.24908e-10	TRUE
LIFE-Heart	5855	C10	NT-proBNP (pg/ml)	0.0723333	0.0104271	6.93707	0.00815489	4.43481e-12	1.2861e-10	3.24908e-10	TRUE
LIFE-Adult	9623	C10	NT-proBNP (pg/ml)	0.15241	0.0146687	10.3901	0.0110963	3.73441e-25	1.68048e-24	1.48531e-29	TRUE
LIFE-Heart	3040	C10	Number of plaques	0.0461762	0.0115922	3.98337	0.00519577	6.95405e-05	0.000403335	3.24908e-10	TRUE
LIFE-Adult	9237	C10	Number of plaques	0.0686268	0.00908282	7.55568	0.00614375	4.56347e-14	1.36904e-13	1.48531e-29	TRUE
LIFE-Heart	3099	C10	Peripheral artery disease	0.221933	0.050321	4.41035	0.00624147	1.06716e-05	7.73693e-05	3.24908e-10	TRUE
LIFE-Adult	8723	C10	Peripheral artery disease	0.10682	0.0441714	2.4183	0.000670135	0.0156137	0.0175654	1.48531e-29	TRUE
LIFE-Heart	5860	C10	Main stem stenosis	0.135293	0.0436173	3.10183	0.00163974	0.00193244	0.0080058	3.24908e-10	TRUE
LIFE-Heart	5749	C10	CAD score	0.0486164	0.0247005	1.96823	0.000673627	0.0490891	0.101685	3.24908e-10	FALSE
LIFE-Heart	5686	C10	Valvular disease	0.1339	0.0529051	2.53095	0.00112571	0.011402	0.0367399	3.24908e-10	TRUE
LIFE-Heart	3040	C10	Any plaques	0.0811457	0.0326503	2.4853	0.00202902	0.0129977	0.0376934	3.24908e-10	TRUE
LIFE-Adult	9237	C10	Any plaques	0.125696	0.0193433	6.49819	0.00455163	8.5493e-11	1.53887e-10	1.48531e-29	TRUE
LIFE-Heart	3039	C10:1	Ankle brachial index	-0.0410766	0.0115452	-3.55789	0.00415083	0.000379561	0.00550364	7.87456e-06	TRUE
LIFE-Adult	8685	C10:1	Ankle brachial index	-0.00161493	0.0103243	-0.156421	2.81785e-06	0.875705	0.875705	1.35842e-33	FALSE
LIFE-Adult	8580	C10:1	Brachial-ankle pulse wave velocity	0.0897462	0.00913813	9.82107	0.0111193	1.2025e-22	5.41123e-22	1.35842e-33	TRUE
LIFE-Adult	3935	C10:1	Brachial-femoral pulse wave velocity	0.0665874	0.013441	4.95405	0.00620148	7.57411e-07	9.73815e-07	1.35842e-33	TRUE
LIFE-Heart	5749	C10:1	Number of vessel disease (50% stenosis)	0.0281677	0.0103365	2.72507	0.00129048	0.00644832	0.0374003	7.87456e-06	TRUE
LIFE-Adult	8200	C10:1	carotid-femoral pulse wave velocity	0.0543651	0.0093832	5.79388	0.00407808	7.13214e-09	1.06982e-08	1.35842e-33	TRUE
LIFE-Heart	2970	C10:1	Carotid intima media thickness	0.0171194	0.0149022	1.14878	0.000444444	0.250739	0.366991	7.87456e-06	FALSE
LIFE-Adult	9317	C10:1	Carotid intima media thickness	0.0772588	0.00887725	8.70302	0.00806565	3.78182e-18	1.13455e-17	1.35842e-33	TRUE
LIFE-Heart	4701	C10:1	Aortic bulb (mm)	-0.0146279	0.0120389	-1.21505	0.000314086	0.224407	0.366991	7.87456e-06	FALSE
LIFE-Heart	1537	C10:1	Deceleration time (ms)	0.0109526	0.0206819	0.529577	0.000182672	0.596482	0.720749	7.87456e-06	FALSE
LIFE-Heart	971	C10:1	End-diastolic volume (biplane, ml)	-0.0306055	0.0267638	-1.14354	0.0013477	0.253097	0.366991	7.87456e-06	FALSE
LIFE-Heart	1134	C10:1	Ejection Fraction (biplane, %)	0.0289463	0.0251003	1.15323	0.00117347	0.249061	0.366991	7.87456e-06	FALSE
LIFE-Heart	1317	C10:1	Ejection Fraction (%)	0.0250252	0.0229401	1.0909	0.000904165	0.275519	0.380478	7.87456e-06	FALSE
LIFE-Heart	431	C10:1	E point-septal separation (mm)	-0.0145619	0.0411868	-0.353557	0.000291297	0.723844	0.83966	7.87456e-06	FALSE
LIFE-Heart	977	C10:1	End-systolic volume (biplane, ml)	-0.0383342	0.0268211	-1.42925	0.00209076	0.153252	0.296287	7.87456e-06	FALSE
LIFE-Heart	1111	C10:1	Flow Propagation Velocity (cm/s)	-0.0329199	0.024468	-1.34543	0.00162959	0.178763	0.324008	7.87456e-06	FALSE
LIFE-Heart	4171	C10:1	Fractional shortening (%)	-0.0132924	0.0127413	-1.04325	0.000260996	0.296892	0.391357	7.87456e-06	FALSE
LIFE-Heart	977	C10:1	Left ventricular mass (g)	-0.0209977	0.0266974	-0.786507	0.000634052	0.431762	0.544395	7.87456e-06	FALSE
LIFE-Heart	2491	C10:1	Left ventricular function	0.0301957	0.0180789	1.67022	0.00111953	0.095001	0.196788	7.87456e-06	FALSE
LIFE-Heart	5347	C10:1	Left ventricular internal diameter end diastole	-0.00267287	0.0112669	-0.237231	1.05291e-05	0.812487	0.872671	7.87456e-06	FALSE
LIFE-Heart	4182	C10:1	Left ventricular internal diameter end systole	0.00126566	0.0127478	0.0992846	2.35823e-06	0.920917	0.920917	7.87456e-06	FALSE
LIFE-Heart	4683	C10:1	Back wall (M-mode, mm)	0.0202551	0.0120726	1.67778	0.000600997	0.0934561	0.196788	7.87456e-06	FALSE
LIFE-Heart	1318	C10:1	Pulmonary venous flow diastolic (cm/s)	0.0378426	0.0223183	1.69559	0.0021799	0.0902005	0.196788	7.87456e-06	FALSE
LIFE-Heart	1318	C10:1	Pulmonary venous flow systolic (cm/s)	0.00443057	0.0223337	0.198381	2.99041e-05	0.842778	0.872877	7.87456e-06	FALSE
LIFE-Heart	5452	C10:1	Septum (mm)	0.0206146	0.0111299	1.85218	0.00062907	0.0640533	0.196788	7.87456e-06	FALSE
LIFE-Heart	2399	C10:1	Tricuspid annular plane systolic excursion (mm)	-0.00517634	0.0168225	-0.307703	3.94982e-05	0.758335	0.845836	7.87456e-06	FALSE
LIFE-Heart	5855	C10:1	NT-proBNP (pg/ml)	0.051669	0.00986192	5.23924	0.00466795	1.66882e-07	4.83958e-06	7.87456e-06	TRUE
LIFE-Adult	9623	C10:1	NT-proBNP (pg/ml)	0.168333	0.0135484	12.4245	0.0157916	3.57889e-35	3.221e-34	1.35842e-33	TRUE
LIFE-Heart	3040	C10:1	Number of plaques	0.0329272	0.0108253	3.04169	0.00303614	0.00237264	0.0229355	7.87456e-06	TRUE
LIFE-Adult	9237	C10:1	Number of plaques	0.065541	0.00839001	7.81179	0.00656454	6.25359e-15	1.12565e-14	1.35842e-33	TRUE
LIFE-Heart	3099	C10:1	Peripheral artery disease	0.138501	0.0472453	2.93153	0.00276723	0.00339763	0.0246328	7.87456e-06	TRUE
LIFE-Adult	8723	C10:1	Peripheral artery disease	0.0687194	0.0408698	1.68142	0.000324076	0.0927166	0.104306	1.35842e-33	FALSE
LIFE-Heart	5860	C10:1	Main stem stenosis	0.103706	0.0411898	2.51777	0.00108097	0.0118364	0.0572094	7.87456e-06	FALSE
LIFE-Heart	5749	C10:1	CAD score	0.0408196	0.0233691	1.74673	0.000530617	0.0807372	0.196788	7.87456e-06	FALSE
LIFE-Heart	5686	C10:1	Valvular disease	0.0851127	0.0499305	1.70462	0.000510954	0.0883191	0.196788	7.87456e-06	FALSE
LIFE-Heart	3040	C10:1	Any plaques	0.0686	0.0304626	2.25194	0.00166648	0.0243973	0.101075	7.87456e-06	FALSE
LIFE-Adult	9237	C10:1	Any plaques	0.14047	0.0178527	7.86827	0.00665917	4.00035e-15	9.00079e-15	1.35842e-33	TRUE
LIFE-Heart	3039	C12	Ankle brachial index	-0.0408606	0.0118869	-3.43745	0.00387563	0.000595107	0.00337619	6.82176e-10	TRUE
LIFE-Adult	8684	C12	Ankle brachial index	-0.0101201	0.0105214	-0.961862	0.000106551	0.336146	0.336146	5.31508e-22	FALSE
LIFE-Adult	8579	C12	Brachial-ankle pulse wave velocity	0.09299	0.00930005	9.99887	0.0115222	2.07002e-23	1.86302e-22	5.31508e-22	TRUE
LIFE-Adult	3934	C12	Brachial-femoral pulse wave velocity	0.0182328	0.013556	1.345	0.000459864	0.178704	0.229762	5.31508e-22	FALSE
LIFE-Heart	5749	C12	Number of vessel disease (50% stenosis)	0.0497405	0.0107078	4.64525	0.00374066	3.47245e-06	5.03505e-05	6.82176e-10	TRUE
LIFE-Adult	8199	C12	carotid-femoral pulse wave velocity	0.0308082	0.00956724	3.22018	0.00126344	0.0012861	0.00192915	5.31508e-22	TRUE
LIFE-Heart	2970	C12	Carotid intima media thickness	0.0245175	0.0155061	1.58116	0.000841628	0.113949	0.183584	6.82176e-10	FALSE
LIFE-Adult	9316	C12	Carotid intima media thickness	0.0648555	0.00908141	7.14157	0.00544602	9.91879e-13	2.97564e-12	5.31508e-22	TRUE
LIFE-Heart	4701	C12	Aortic bulb (mm)	0.0307865	0.0123635	2.49012	0.00131784	0.0128043	0.0309437	6.82176e-10	TRUE
LIFE-Heart	1537	C12	Deceleration time (ms)	-0.0419263	0.0211528	-1.98207	0.00255282	0.0476495	0.0921224	6.82176e-10	FALSE
LIFE-Heart	971	C12	End-diastolic volume (biplane, ml)	-0.00871637	0.0280965	-0.31023	9.93119e-05	0.756453	0.783469	6.82176e-10	FALSE
LIFE-Heart	1134	C12	Ejection Fraction (biplane, %)	-0.035824	0.0261996	-1.36735	0.00164891	0.171786	0.2622	6.82176e-10	FALSE
LIFE-Heart	1317	C12	Ejection Fraction (%)	-0.0154755	0.0239237	-0.646868	0.000318103	0.51783	0.556188	6.82176e-10	FALSE
LIFE-Heart	431	C12	E point-septal separation (mm)	-0.0390667	0.0424251	-0.920838	0.00197266	0.357653	0.432164	6.82176e-10	FALSE
LIFE-Heart	977	C12	End-systolic volume (biplane, ml)	0.00498537	0.028142	0.177151	3.21861e-05	0.859427	0.859427	6.82176e-10	FALSE
LIFE-Heart	1111	C12	Flow Propagation Velocity (cm/s)	-0.0271227	0.0245963	-1.10271	0.00109526	0.270391	0.373397	6.82176e-10	FALSE
LIFE-Heart	4171	C12	Fractional shortening (%)	-0.0358472	0.0130365	-2.74975	0.00181038	0.00598973	0.0157911	6.82176e-10	TRUE
LIFE-Heart	977	C12	Left ventricular mass (g)	0.0199218	0.0279947	0.711628	0.00051913	0.476865	0.531888	6.82176e-10	FALSE
LIFE-Heart	2491	C12	Left ventricular function	0.0350177	0.0189521	1.8477	0.00136975	0.0647646	0.110481	6.82176e-10	FALSE
LIFE-Heart	5347	C12	Left ventricular internal diameter end diastole	0.0379051	0.0116618	3.25038	0.0019727	0.00115967	0.00480433	6.82176e-10	TRUE
LIFE-Heart	4182	C12	Left ventricular internal diameter end systole	0.0442388	0.0130394	3.39269	0.00274611	0.000698522	0.00337619	6.82176e-10	TRUE
LIFE-Heart	4683	C12	Back wall (M-mode, mm)	0.0370917	0.0123789	2.99637	0.00191434	0.00274649	0.00995603	6.82176e-10	TRUE
LIFE-Heart	1318	C12	Pulmonary venous flow diastolic (cm/s)	0.0191073	0.0229253	0.833459	0.000527574	0.404737	0.469495	6.82176e-10	FALSE
LIFE-Heart	1318	C12	Pulmonary venous flow systolic (cm/s)	-0.0214713	0.022975	-0.934549	0.000663225	0.350192	0.432164	6.82176e-10	FALSE
LIFE-Heart	5452	C12	Septum (mm)	0.0235964	0.0115441	2.04402	0.000766022	0.0409995	0.0849276	6.82176e-10	FALSE
LIFE-Heart	2399	C12	Tricuspid annular plane systolic excursion (mm)	-0.0402031	0.0178753	-2.24909	0.00210587	0.0245971	0.0548704	6.82176e-10	FALSE
LIFE-Heart	5855	C12	NT-proBNP (pg/ml)	0.0697569	0.0102235	6.82319	0.00789143	9.80137e-12	2.8424e-10	6.82176e-10	TRUE
LIFE-Adult	9622	C12	NT-proBNP (pg/ml)	0.101628	0.013904	7.30925	0.00552287	2.90044e-13	1.3052e-12	5.31508e-22	TRUE
LIFE-Heart	3040	C12	Number of plaques	0.0415864	0.0111949	3.71476	0.00452175	0.000207054	0.00150114	6.82176e-10	TRUE
LIFE-Adult	9236	C12	Number of plaques	0.0568281	0.00856968	6.63129	0.00473962	3.51412e-11	7.90677e-11	5.31508e-22	TRUE
LIFE-Heart	3099	C12	Peripheral artery disease	0.14092	0.0487424	2.89112	0.00269167	0.00386539	0.0124552	6.82176e-10	TRUE
LIFE-Adult	8722	C12	Peripheral artery disease	0.0504616	0.041622	1.21238	0.000168534	0.2254	0.253575	5.31508e-22	FALSE
LIFE-Heart	5860	C12	Main stem stenosis	0.170509	0.0427345	3.98996	0.00271025	6.68895e-05	0.000646599	6.82176e-10	TRUE
LIFE-Heart	5749	C12	CAD score	0.0251142	0.0242425	1.03596	0.000186709	0.300264	0.395803	6.82176e-10	FALSE
LIFE-Heart	5686	C12	Valvular disease	0.0996713	0.0518354	1.92284	0.000650056	0.0545498	0.0988716	6.82176e-10	FALSE
LIFE-Heart	3040	C12	Any plaques	0.0876996	0.0315124	2.78302	0.00254296	0.00541885	0.0157147	6.82176e-10	TRUE
LIFE-Adult	9236	C12	Any plaques	0.117987	0.0182348	6.47041	0.00451346	1.02701e-10	1.84862e-10	5.31508e-22	TRUE
LIFE-Heart	3039	C14	Ankle brachial index	-0.0512954	0.0127566	-4.02108	0.00529584	5.93412e-05	0.000430223	8.63062e-10	TRUE
LIFE-Adult	8685	C14	Ankle brachial index	0.00856629	0.010967	0.781095	7.02599e-05	0.434768	0.434768	3.09618e-19	FALSE
LIFE-Adult	8580	C14	Brachial-ankle pulse wave velocity	0.0903162	0.00968779	9.32269	0.0100304	1.41864e-20	1.27678e-19	3.09618e-19	TRUE
LIFE-Adult	3935	C14	Brachial-femoral pulse wave velocity	0.0263076	0.0141344	1.86125	0.000880045	0.0627829	0.0706308	3.09618e-19	FALSE
LIFE-Heart	5749	C14	Number of vessel disease (50% stenosis)	0.031376	0.0114008	2.75208	0.00131616	0.00594046	0.0151615	8.63062e-10	TRUE
LIFE-Adult	8200	C14	carotid-femoral pulse wave velocity	0.0229041	0.0099222	2.30837	0.000649561	0.0210034	0.0315052	3.09618e-19	TRUE
LIFE-Heart	2970	C14	Carotid intima media thickness	0.0381723	0.0165574	2.30546	0.00178761	0.0212095	0.043934	8.63062e-10	FALSE
LIFE-Adult	9317	C14	Carotid intima media thickness	0.0822603	0.00942992	8.72332	0.00810304	3.16586e-18	1.42463e-17	3.09618e-19	TRUE
LIFE-Heart	4701	C14	Aortic bulb (mm)	0.0232327	0.013189	1.76152	0.000659907	0.0782155	0.113412	8.63062e-10	FALSE
LIFE-Heart	1537	C14	Deceleration time (ms)	-0.00560501	0.0226147	-0.247848	4.0017e-05	0.804285	0.804285	8.63062e-10	FALSE
LIFE-Heart	971	C14	End-diastolic volume (biplane, ml)	0.0369062	0.029541	1.24932	0.00160815	0.211849	0.255984	8.63062e-10	FALSE
LIFE-Heart	1134	C14	Ejection Fraction (biplane, %)	-0.0492231	0.027348	-1.79988	0.00285364	0.0721459	0.113412	8.63062e-10	FALSE
LIFE-Heart	1317	C14	Ejection Fraction (%)	-0.0545089	0.0252779	-2.15638	0.00352365	0.0312347	0.0603871	8.63062e-10	FALSE
LIFE-Heart	431	C14	E point-septal separation (mm)	0.0592188	0.0449007	1.31888	0.0040383	0.187911	0.236932	8.63062e-10	FALSE
LIFE-Heart	977	C14	End-systolic volume (biplane, ml)	0.0599461	0.0294071	2.03849	0.0042439	0.0417704	0.0712554	8.63062e-10	FALSE
LIFE-Heart	1111	C14	Flow Propagation Velocity (cm/s)	0.00771529	0.027047	0.285255	7.33672e-05	0.775502	0.803199	8.63062e-10	FALSE
LIFE-Heart	4171	C14	Fractional shortening (%)	-0.0471942	0.0138926	-3.39709	0.00276045	0.000687453	0.00249202	8.63062e-10	TRUE
LIFE-Heart	977	C14	Left ventricular mass (g)	0.0800874	0.0292389	2.73907	0.00763611	0.00627374	0.0151615	8.63062e-10	TRUE
LIFE-Heart	2491	C14	Left ventricular function	0.0351807	0.0198112	1.7758	0.00126536	0.0758876	0.113412	8.63062e-10	FALSE
LIFE-Heart	5347	C14	Left ventricular internal diameter end diastole	0.0360057	0.0123449	2.91664	0.00158902	0.00355291	0.0103034	8.63062e-10	TRUE
LIFE-Heart	4182	C14	Left ventricular internal diameter end systole	0.0640124	0.0138855	4.61001	0.00505853	4.14674e-06	4.00851e-05	8.63062e-10	TRUE
LIFE-Heart	4683	C14	Back wall (M-mode, mm)	0.0507178	0.0131323	3.86207	0.00317629	0.000113949	0.000550752	8.63062e-10	TRUE
LIFE-Heart	1318	C14	Pulmonary venous flow diastolic (cm/s)	0.0401339	0.0245098	1.63746	0.00203331	0.101772	0.140163	8.63062e-10	FALSE
LIFE-Heart	1318	C14	Pulmonary venous flow systolic (cm/s)	-0.0169937	0.0245602	-0.691922	0.000363665	0.489108	0.545544	8.63062e-10	FALSE
LIFE-Heart	5452	C14	Septum (mm)	0.0621811	0.0121865	5.10247	0.0047544	3.46607e-07	5.02581e-06	8.63062e-10	TRUE
LIFE-Heart	2399	C14	Tricuspid annular plane systolic excursion (mm)	-0.0208266	0.0186547	-1.11643	0.000519718	0.264351	0.306647	8.63062e-10	FALSE
LIFE-Heart	5855	C14	NT-proBNP (pg/ml)	0.0736445	0.0108533	6.78548	0.00780511	1.27103e-11	3.686e-10	8.63062e-10	TRUE
LIFE-Adult	9623	C14	NT-proBNP (pg/ml)	0.0818356	0.0144754	5.65342	0.00331103	1.61768e-08	2.91182e-08	3.09618e-19	TRUE
LIFE-Heart	3040	C14	Number of plaques	0.0474546	0.0120023	3.9538	0.00511933	7.8674e-05	0.000456309	8.63062e-10	TRUE
LIFE-Adult	9237	C14	Number of plaques	0.0605914	0.00891298	6.79811	0.00497934	1.12563e-11	3.37688e-11	3.09618e-19	TRUE
LIFE-Heart	3099	C14	Peripheral artery disease	0.170374	0.0522405	3.26133	0.00342263	0.00112092	0.00361185	8.63062e-10	TRUE
LIFE-Adult	8723	C14	Peripheral artery disease	0.0892929	0.0433956	2.05765	0.000485251	0.0396534	0.0509829	3.09618e-19	FALSE
LIFE-Heart	5860	C14	Main stem stenosis	0.0733703	0.0454261	1.61516	0.000445131	0.10633	0.140163	8.63062e-10	FALSE
LIFE-Heart	5749	C14	CAD score	0.0122262	0.025782	0.474216	3.91285e-05	0.635364	0.682428	8.63062e-10	FALSE
LIFE-Heart	5686	C14	Valvular disease	0.207169	0.0548724	3.77547	0.0025015	0.000161335	0.00066839	8.63062e-10	TRUE
LIFE-Heart	3040	C14	Any plaques	0.0781713	0.0338085	2.31218	0.00175668	0.0208344	0.043934	8.63062e-10	FALSE
LIFE-Adult	9237	C14	Any plaques	0.117034	0.0189747	6.16791	0.00410254	7.21041e-10	1.62234e-09	3.09618e-19	TRUE
LIFE-Heart	3039	C14:1	Ankle brachial index	-0.032576	0.0117587	-2.77037	0.00252078	0.00563331	0.0136138	1.57453e-19	TRUE
LIFE-Adult	8685	C14:1	Ankle brachial index	-0.0286767	0.0107088	-2.67786	0.000825175	0.00742344	0.00835137	4.96012e-28	TRUE
LIFE-Adult	8580	C14:1	Brachial-ankle pulse wave velocity	0.106961	0.00944948	11.3193	0.0147167	1.70451e-29	1.53406e-28	4.96012e-28	TRUE
LIFE-Adult	3935	C14:1	Brachial-femoral pulse wave velocity	0.0719658	0.0138994	5.1776	0.00676991	2.36003e-07	3.54004e-07	4.96012e-28	TRUE
LIFE-Heart	5749	C14:1	Number of vessel disease (50% stenosis)	0.0507933	0.0107059	4.74441	0.00390144	2.14177e-06	1.24222e-05	1.57453e-19	TRUE
LIFE-Adult	8200	C14:1	carotid-femoral pulse wave velocity	0.049946	0.00972211	5.13736	0.00320905	2.85039e-07	3.66479e-07	4.96012e-28	TRUE
LIFE-Heart	2970	C14:1	Carotid intima media thickness	0.00985782	0.0153364	0.642773	0.000139184	0.520421	0.58047	1.57453e-19	FALSE
LIFE-Adult	9317	C14:1	Carotid intima media thickness	0.0591225	0.00921718	6.41438	0.00439756	1.48275e-10	2.66895e-10	4.96012e-28	TRUE
LIFE-Heart	4701	C14:1	Aortic bulb (mm)	0.0023754	0.0124242	0.191191	7.77907e-06	0.848384	0.848384	1.57453e-19	FALSE
LIFE-Heart	1537	C14:1	Deceleration time (ms)	-0.00558712	0.0207113	-0.269762	4.74059e-05	0.78738	0.845704	1.57453e-19	FALSE
LIFE-Heart	971	C14:1	End-diastolic volume (biplane, ml)	0.0519714	0.0274135	1.89584	0.00369547	0.0582791	0.0768224	1.57453e-19	FALSE
LIFE-Heart	1134	C14:1	Ejection Fraction (biplane, %)	-0.0603888	0.0254702	-2.37096	0.00494142	0.0179085	0.0259673	1.57453e-19	TRUE
LIFE-Heart	1317	C14:1	Ejection Fraction (%)	-0.0579667	0.0232464	-2.49357	0.00470619	0.0127686	0.0223459	1.57453e-19	TRUE
LIFE-Heart	431	C14:1	E point-septal separation (mm)	0.104636	0.0407138	2.57003	0.015163	0.0105054	0.0203105	1.57453e-19	TRUE
LIFE-Heart	977	C14:1	End-systolic volume (biplane, ml)	0.0668182	0.0273227	2.44552	0.00609651	0.0146404	0.0223459	1.57453e-19	TRUE
LIFE-Heart	1111	C14:1	Flow Propagation Velocity (cm/s)	-0.00547798	0.0243465	-0.225001	4.56475e-05	0.82202	0.848384	1.57453e-19	FALSE
LIFE-Heart	4171	C14:1	Fractional shortening (%)	-0.0833891	0.0130663	-6.382	0.00967519	1.93876e-10	2.8112e-09	1.57453e-19	TRUE
LIFE-Heart	977	C14:1	Left ventricular mass (g)	0.0439098	0.0271588	1.61678	0.00267382	0.10625	0.128385	1.57453e-19	FALSE
LIFE-Heart	2491	C14:1	Left ventricular function	0.0701667	0.0189291	3.70681	0.00549015	0.000214467	0.000621954	1.57453e-19	TRUE
LIFE-Heart	5347	C14:1	Left ventricular internal diameter end diastole	0.0502794	0.011652	4.31508	0.00347152	1.62425e-05	7.85053e-05	1.57453e-19	TRUE
LIFE-Heart	4182	C14:1	Left ventricular internal diameter end systole	0.0803358	0.01305	6.156	0.00898464	8.16199e-10	7.88992e-09	1.57453e-19	TRUE
LIFE-Heart	4683	C14:1	Back wall (M-mode, mm)	0.0385975	0.012388	3.11571	0.00206955	0.00184611	0.00486703	1.57453e-19	TRUE
LIFE-Heart	1318	C14:1	Pulmonary venous flow diastolic (cm/s)	0.031365	0.0223989	1.40029	0.00148777	0.161662	0.187527	1.57453e-19	FALSE
LIFE-Heart	1318	C14:1	Pulmonary venous flow systolic (cm/s)	0.0393796	0.0224288	1.75577	0.00233701	0.0793611	0.100064	1.57453e-19	FALSE
LIFE-Heart	5452	C14:1	Septum (mm)	0.0304192	0.0115615	2.63107	0.00126858	0.00853557	0.0190409	1.57453e-19	TRUE
LIFE-Heart	2399	C14:1	Tricuspid annular plane systolic excursion (mm)	-0.0436572	0.0177473	-2.45993	0.00251815	0.0139665	0.0223459	1.57453e-19	TRUE
LIFE-Heart	5855	C14:1	NT-proBNP (pg/ml)	0.0979444	0.0101756	9.6254	0.0155825	9.04904e-22	2.62422e-20	1.57453e-19	TRUE
LIFE-Adult	9623	C14:1	NT-proBNP (pg/ml)	0.142554	0.0140901	10.1173	0.0105273	6.09689e-24	2.7436e-23	4.96012e-28	TRUE
LIFE-Heart	3040	C14:1	Number of plaques	0.056103	0.0110887	5.05947	0.00835561	4.45418e-07	3.22928e-06	1.57453e-19	TRUE
LIFE-Adult	9237	C14:1	Number of plaques	0.0712015	0.00868829	8.19512	0.00721982	2.83718e-16	8.51155e-16	4.96012e-28	TRUE
LIFE-Heart	3099	C14:1	Peripheral artery disease	0.119297	0.0483082	2.46949	0.00196526	0.0135841	0.0223459	1.57453e-19	TRUE
LIFE-Adult	8723	C14:1	Peripheral artery disease	0.0933995	0.0424058	2.20252	0.000555943	0.0276549	0.0276549	4.96012e-28	TRUE
LIFE-Heart	5860	C14:1	Main stem stenosis	0.16695	0.0427156	3.90841	0.00260087	9.39551e-05	0.000302744	1.57453e-19	TRUE
LIFE-Heart	5749	C14:1	CAD score	0.0493733	0.0242336	2.03739	0.000721758	0.0416571	0.0575265	1.57453e-19	FALSE
LIFE-Heart	5686	C14:1	Valvular disease	0.217571	0.0516599	4.2116	0.0031109	2.57491e-05	0.000106675	1.57453e-19	TRUE
LIFE-Heart	3040	C14:1	Any plaques	0.130464	0.031224	4.17834	0.00571388	3.01924e-05	0.000109447	1.57453e-19	TRUE
LIFE-Adult	9237	C14:1	Any plaques	0.139731	0.0184983	7.5537	0.00614056	4.63279e-14	1.04238e-13	4.96012e-28	TRUE
LIFE-Heart	3039	C14OH	Ankle brachial index	-0.0209146	0.0103711	-2.01663	0.0013373	0.0438215	0.157172	4.8509e-05	FALSE
LIFE-Adult	8685	C14OH	Ankle brachial index	0.00404923	0.00866871	0.467109	2.51279e-05	0.640434	0.720488	0.0010076	FALSE
LIFE-Adult	8580	C14OH	Brachial-ankle pulse wave velocity	0.0300205	0.00770896	3.89423	0.00176478	9.92597e-05	0.000893338	0.0010076	TRUE
LIFE-Adult	3935	C14OH	Brachial-femoral pulse wave velocity	0.0189947	0.0116281	1.63352	0.000677999	0.10244	0.230491	0.0010076	FALSE
LIFE-Heart	5749	C14OH	Number of vessel disease (50% stenosis)	0.00369837	0.00905163	0.408587	2.90479e-05	0.682858	0.803167	4.8509e-05	FALSE
LIFE-Adult	8200	C14OH	carotid-femoral pulse wave velocity	-0.000369575	0.00791125	-0.0467152	2.662e-07	0.962741	0.962741	0.0010076	FALSE
LIFE-Heart	2970	C14OH	Carotid intima media thickness	0.0180687	0.0133367	1.35481	0.000618049	0.175582	0.363706	4.8509e-05	FALSE
LIFE-Adult	9317	C14OH	Carotid intima media thickness	0.0139671	0.00747312	1.86898	0.000374854	0.0616574	0.185259	0.0010076	FALSE
LIFE-Heart	4701	C14OH	Aortic bulb (mm)	0.015552	0.0104217	1.49227	0.000473679	0.135695	0.303561	4.8509e-05	FALSE
LIFE-Heart	1537	C14OH	Deceleration time (ms)	-0.0105885	0.0186278	-0.568427	0.00021045	0.569829	0.748447	4.8509e-05	FALSE
LIFE-Heart	971	C14OH	End-diastolic volume (biplane, ml)	0.0234301	0.0225991	1.03677	0.00110806	0.3001	0.458047	4.8509e-05	FALSE
LIFE-Heart	1134	C14OH	Ejection Fraction (biplane, %)	-0.00197278	0.0209986	-0.0939481	7.79698e-06	0.925167	0.925167	4.8509e-05	FALSE
LIFE-Heart	1317	C14OH	Ejection Fraction (%)	-0.037465	0.0201759	-1.85691	0.0026153	0.0635467	0.184286	4.8509e-05	FALSE
LIFE-Heart	431	C14OH	E point-septal separation (mm)	0.0344319	0.0349469	0.985263	0.0022577	0.32505	0.471323	4.8509e-05	FALSE
LIFE-Heart	977	C14OH	End-systolic volume (biplane, ml)	0.0250342	0.0228364	1.09624	0.00123104	0.273243	0.458047	4.8509e-05	FALSE
LIFE-Heart	1111	C14OH	Flow Propagation Velocity (cm/s)	0.0232943	0.0219713	1.06021	0.00101254	0.289279	0.458047	4.8509e-05	FALSE
LIFE-Heart	4171	C14OH	Fractional shortening (%)	-0.0193578	0.0110259	-1.75567	0.000738813	0.0792177	0.208847	4.8509e-05	FALSE
LIFE-Heart	977	C14OH	Left ventricular mass (g)	0.0253709	0.0231143	1.09763	0.00123416	0.272637	0.458047	4.8509e-05	FALSE
LIFE-Heart	2491	C14OH	Left ventricular function	0.00510717	0.0153401	0.332929	4.45308e-05	0.739216	0.82451	4.8509e-05	FALSE
LIFE-Heart	5347	C14OH	Left ventricular internal diameter end diastole	0.0038962	0.00984782	0.395641	2.92848e-05	0.692386	0.803167	4.8509e-05	FALSE
LIFE-Heart	4182	C14OH	Left ventricular internal diameter end systole	0.0164402	0.0110275	1.49084	0.000531441	0.136079	0.303561	4.8509e-05	FALSE
LIFE-Heart	4683	C14OH	Back wall (M-mode, mm)	0.0233005	0.010397	2.24107	0.00107178	0.0250684	0.145397	4.8509e-05	FALSE
LIFE-Heart	1318	C14OH	Pulmonary venous flow diastolic (cm/s)	0.0260155	0.0201628	1.29027	0.00126345	0.197184	0.381221	4.8509e-05	FALSE
LIFE-Heart	1318	C14OH	Pulmonary venous flow systolic (cm/s)	-0.039751	0.0201541	-1.97236	0.00294737	0.0487777	0.157172	4.8509e-05	FALSE
LIFE-Heart	5452	C14OH	Septum (mm)	0.0333983	0.00971337	3.43839	0.00216457	0.000589573	0.0085488	4.8509e-05	TRUE
LIFE-Heart	2399	C14OH	Tricuspid annular plane systolic excursion (mm)	0.00889241	0.0146397	0.607416	0.0001539	0.543632	0.748447	4.8509e-05	FALSE
LIFE-Heart	5855	C14OH	NT-proBNP (pg/ml)	0.0421977	0.00864426	4.88158	0.00405488	1.0803e-06	3.13287e-05	4.8509e-05	TRUE
LIFE-Adult	9623	C14OH	NT-proBNP (pg/ml)	0.0151042	0.0114586	1.31815	0.000180564	0.187484	0.281227	0.0010076	FALSE
LIFE-Heart	3040	C14OH	Number of plaques	0.0205904	0.00973284	2.11556	0.00147103	0.0344638	0.157172	4.8509e-05	FALSE
LIFE-Adult	9237	C14OH	Number of plaques	0.0131879	0.00705878	1.86829	0.000377823	0.061753	0.185259	0.0010076	FALSE
LIFE-Heart	3099	C14OH	Peripheral artery disease	0.0860257	0.0422767	2.03482	0.00133516	0.0419535	0.157172	4.8509e-05	FALSE
LIFE-Adult	8723	C14OH	Peripheral artery disease	0.02361	0.0343253	0.687831	5.42468e-05	0.491577	0.632028	0.0010076	FALSE
LIFE-Heart	5860	C14OH	Main stem stenosis	-0.00853027	0.0361097	-0.236232	9.52631e-06	0.813261	0.873502	4.8509e-05	FALSE
LIFE-Heart	5749	C14OH	CAD score	-0.0109167	0.0204562	-0.533662	4.9553e-05	0.593596	0.748447	4.8509e-05	FALSE
LIFE-Heart	5686	C14OH	Valvular disease	0.0981271	0.0435907	2.2511	0.000890735	0.0244172	0.145397	4.8509e-05	FALSE
LIFE-Heart	3040	C14OH	Any plaques	0.0763245	0.0273548	2.79017	0.00255601	0.00530084	0.0512415	4.8509e-05	FALSE
LIFE-Adult	9237	C14OH	Any plaques	0.0206173	0.015022	1.37247	0.000203931	0.169949	0.281227	0.0010076	FALSE
LIFE-Heart	3039	C16	Ankle brachial index	-0.0473753	0.0137262	-3.45145	0.00390713	0.0005652	0.000780514	1.60048e-19	TRUE
LIFE-Adult	8684	C16	Ankle brachial index	0.0414748	0.0116024	3.57468	0.00146966	0.000352555	0.000528832	2.07254e-51	TRUE
LIFE-Adult	8579	C16	Brachial-ankle pulse wave velocity	0.157787	0.010199	15.4709	0.0271483	2.84885e-53	2.56397e-52	2.07254e-51	TRUE
LIFE-Adult	3935	C16	Brachial-femoral pulse wave velocity	0.029689	0.0153674	1.93195	0.000948103	0.0534376	0.0601173	2.07254e-51	FALSE
LIFE-Heart	5745	C16	Number of vessel disease (50% stenosis)	0.0712252	0.0120105	5.93024	0.00608632	3.20112e-09	9.28324e-09	1.60048e-19	TRUE
LIFE-Adult	8199	C16	carotid-femoral pulse wave velocity	0.0412273	0.0105638	3.9027	0.00185468	9.58871e-05	0.000172597	2.07254e-51	TRUE
LIFE-Heart	2970	C16	Carotid intima media thickness	0.078307	0.0177349	4.41542	0.00652585	1.04413e-05	1.89249e-05	1.60048e-19	TRUE
LIFE-Adult	9316	C16	Carotid intima media thickness	0.118036	0.0099249	11.8929	0.0149587	2.20901e-32	9.94056e-32	2.07254e-51	TRUE
LIFE-Heart	4699	C16	Aortic bulb (mm)	0.104271	0.0138526	7.52722	0.011919	6.17736e-14	3.58287e-13	1.60048e-19	TRUE
LIFE-Heart	1537	C16	Deceleration time (ms)	-0.049328	0.0248378	-1.98601	0.00256294	0.0472104	0.054764	1.60048e-19	FALSE
LIFE-Heart	971	C16	End-diastolic volume (biplane, ml)	0.144598	0.0301308	4.79901	0.0232155	1.84563e-06	3.82309e-06	1.60048e-19	TRUE
LIFE-Heart	1133	C16	Ejection Fraction (biplane, %)	-0.0963001	0.0281404	-3.42213	0.0102484	0.000643537	0.000848299	1.60048e-19	TRUE
LIFE-Heart	1316	C16	Ejection Fraction (%)	-0.0338157	0.0263134	-1.28511	0.00125528	0.198979	0.204524	1.60048e-19	FALSE
LIFE-Heart	431	C16	E point-septal separation (mm)	0.112695	0.0451156	2.49791	0.0143359	0.0128663	0.0162227	1.60048e-19	TRUE
LIFE-Heart	977	C16	End-systolic volume (biplane, ml)	0.146181	0.0301112	4.85472	0.0236021	1.40336e-06	3.13058e-06	1.60048e-19	TRUE
LIFE-Heart	1111	C16	Flow Propagation Velocity (cm/s)	0.0375465	0.0295755	1.26951	0.00145115	0.204524	0.204524	1.60048e-19	FALSE
LIFE-Heart	4171	C16	Fractional shortening (%)	-0.0950359	0.0147283	-6.45259	0.00988826	1.2252e-10	4.44134e-10	1.60048e-19	TRUE
LIFE-Heart	977	C16	Left ventricular mass (g)	0.178436	0.0296164	6.02492	0.0358941	2.39563e-09	7.71927e-09	1.60048e-19	TRUE
LIFE-Heart	2487	C16	Left ventricular function	0.033562	0.0206015	1.62911	0.00106686	0.103417	0.11535	1.60048e-19	FALSE
LIFE-Heart	5344	C16	Left ventricular internal diameter end diastole	0.11635	0.0129831	8.96159	0.0148111	4.34695e-19	6.30308e-18	1.60048e-19	TRUE
LIFE-Heart	4181	C16	Left ventricular internal diameter end systole	0.141383	0.0146774	9.63268	0.0217212	9.77306e-22	2.83419e-20	1.60048e-19	TRUE
LIFE-Heart	4681	C16	Back wall (M-mode, mm)	0.118522	0.0139169	8.51639	0.0152643	2.1907e-17	1.58826e-16	1.60048e-19	TRUE
LIFE-Heart	1318	C16	Pulmonary venous flow diastolic (cm/s)	0.101638	0.0268231	3.78918	0.0107925	0.000157971	0.000229057	1.60048e-19	TRUE
LIFE-Heart	1318	C16	Pulmonary venous flow systolic (cm/s)	-0.0413949	0.0268994	-1.53887	0.00179626	0.124075	0.133266	1.60048e-19	FALSE
LIFE-Heart	5449	C16	Septum (mm)	0.112156	0.0128421	8.73353	0.0138097	3.23835e-18	3.1304e-17	1.60048e-19	TRUE
LIFE-Heart	2396	C16	Tricuspid annular plane systolic excursion (mm)	-0.0470754	0.019566	-2.40599	0.0024122	0.0162043	0.0195802	1.60048e-19	TRUE
LIFE-Heart	5851	C16	NT-proBNP (pg/ml)	0.0742392	0.0114948	6.4585	0.00708102	1.14268e-10	4.44134e-10	1.60048e-19	TRUE
LIFE-Adult	9622	C16	NT-proBNP (pg/ml)	0.0265591	0.0153192	1.73372	0.000312352	0.0830006	0.0830006	2.07254e-51	FALSE
LIFE-Heart	3040	C16	Number of plaques	0.0885071	0.0128031	6.91293	0.0154867	5.76207e-12	2.785e-11	1.60048e-19	TRUE
LIFE-Adult	9236	C16	Number of plaques	0.103159	0.00939333	10.9822	0.012893	6.92195e-28	2.07658e-27	2.07254e-51	TRUE
LIFE-Heart	3099	C16	Peripheral artery disease	0.261996	0.0559993	4.67856	0.00701819	3.01272e-06	5.82459e-06	1.60048e-19	TRUE
LIFE-Adult	8722	C16	Peripheral artery disease	0.10092	0.0459718	2.19527	0.000552355	0.0281708	0.0362196	2.07254e-51	TRUE
LIFE-Heart	5856	C16	Main stem stenosis	0.203067	0.0480023	4.23035	0.00304772	2.36885e-05	3.81649e-05	1.60048e-19	TRUE
LIFE-Heart	5745	C16	CAD score	0.116599	0.027174	4.29082	0.00319559	1.80941e-05	3.08664e-05	1.60048e-19	TRUE
LIFE-Heart	5682	C16	Valvular disease	0.227083	0.0579858	3.91619	0.00269283	9.10127e-05	0.000138914	1.60048e-19	TRUE
LIFE-Heart	3040	C16	Any plaques	0.203349	0.0360976	5.63333	0.0103378	1.92917e-08	4.66215e-08	1.60048e-19	TRUE
LIFE-Adult	9236	C16	Any plaques	0.200083	0.0200071	10.0006	0.0107147	1.99338e-23	4.4851e-23	2.07254e-51	TRUE
LIFE-Heart	3039	C16:1	Ankle brachial index	-0.0592648	0.0122938	-4.82072	0.00759395	1.50075e-06	7.2536e-06	7.27853e-21	TRUE
LIFE-Adult	8685	C16:1	Ankle brachial index	-0.0260187	0.0106975	-2.43221	0.000680827	0.015027	0.015027	7.41652e-14	TRUE
LIFE-Adult	8580	C16:1	Brachial-ankle pulse wave velocity	0.0746182	0.00949132	7.86173	0.00715372	4.24772e-15	3.82295e-14	7.41652e-14	TRUE
LIFE-Adult	3935	C16:1	Brachial-femoral pulse wave velocity	0.0419547	0.0138548	3.02817	0.00232609	0.00247634	0.00278588	7.41652e-14	TRUE
LIFE-Heart	5749	C16:1	Number of vessel disease (50% stenosis)	0.0452986	0.0111241	4.07212	0.00287706	4.72134e-05	0.000171149	7.27853e-21	TRUE
LIFE-Adult	8200	C16:1	carotid-femoral pulse wave velocity	0.0356576	0.00970811	3.67297	0.00164291	0.00024127	0.000361905	7.41652e-14	TRUE
LIFE-Heart	2970	C16:1	Carotid intima media thickness	-0.00561896	0.016202	-0.346807	4.05222e-05	0.728761	0.728761	7.27853e-21	FALSE
LIFE-Adult	9317	C16:1	Carotid intima media thickness	0.0451581	0.00922057	4.89754	0.00256836	9.86759e-07	1.77617e-06	7.41652e-14	TRUE
LIFE-Heart	4701	C16:1	Aortic bulb (mm)	-0.00479325	0.0128785	-0.372189	2.94788e-05	0.709769	0.728761	7.27853e-21	FALSE
LIFE-Heart	1537	C16:1	Deceleration time (ms)	-0.0456835	0.0218171	-2.09393	0.00284824	0.03643	0.0446959	7.27853e-21	FALSE
LIFE-Heart	971	C16:1	End-diastolic volume (biplane, ml)	0.0314728	0.0286289	1.09934	0.00124565	0.271894	0.303266	7.27853e-21	FALSE
LIFE-Heart	1134	C16:1	Ejection Fraction (biplane, %)	-0.103113	0.0263062	-3.91972	0.0133908	9.39717e-05	0.000272518	7.27853e-21	TRUE
LIFE-Heart	1317	C16:1	Ejection Fraction (%)	-0.0810465	0.0242246	-3.34563	0.00844013	0.00084411	0.00188302	7.27853e-21	TRUE
LIFE-Heart	431	C16:1	E point-septal separation (mm)	0.0930068	0.0427544	2.17538	0.0109106	0.0301473	0.0397396	7.27853e-21	TRUE
LIFE-Heart	977	C16:1	End-systolic volume (biplane, ml)	0.0593096	0.0283949	2.08874	0.00445478	0.0369897	0.0446959	7.27853e-21	FALSE
LIFE-Heart	1111	C16:1	Flow Propagation Velocity (cm/s)	0.0527049	0.0258481	2.03903	0.00373498	0.0416842	0.0483537	7.27853e-21	FALSE
LIFE-Heart	4171	C16:1	Fractional shortening (%)	-0.0860497	0.0135601	-6.34582	0.00956684	2.44854e-10	2.36692e-09	7.27853e-21	TRUE
LIFE-Heart	977	C16:1	Left ventricular mass (g)	0.0779834	0.0281277	2.77248	0.00782205	0.00566918	0.00865296	7.27853e-21	TRUE
LIFE-Heart	2491	C16:1	Left ventricular function	0.0553133	0.0195114	2.83492	0.00321851	0.00462077	0.00802235	7.27853e-21	TRUE
LIFE-Heart	5347	C16:1	Left ventricular internal diameter end diastole	0.0339551	0.0120836	2.81001	0.00147511	0.00497207	0.00802235	7.27853e-21	TRUE
LIFE-Heart	4182	C16:1	Left ventricular internal diameter end systole	0.0882673	0.013562	6.50842	0.0100322	8.49111e-11	1.23121e-09	7.27853e-21	TRUE
LIFE-Heart	4683	C16:1	Back wall (M-mode, mm)	0.0379985	0.0128559	2.95573	0.00186286	0.00313489	0.00606079	7.27853e-21	TRUE
LIFE-Heart	1318	C16:1	Pulmonary venous flow diastolic (cm/s)	0.0604251	0.0230605	2.62029	0.00519017	0.00888671	0.0122721	7.27853e-21	TRUE
LIFE-Heart	1318	C16:1	Pulmonary venous flow systolic (cm/s)	-0.0247476	0.0232184	-1.06586	0.000862527	0.286681	0.307916	7.27853e-21	FALSE
LIFE-Heart	5452	C16:1	Septum (mm)	0.0531755	0.0119266	4.45856	0.00363422	8.41696e-06	3.48702e-05	7.27853e-21	TRUE
LIFE-Heart	2399	C16:1	Tricuspid annular plane systolic excursion (mm)	-0.0694903	0.0182413	-3.80951	0.00601796	0.000142742	0.00037632	7.27853e-21	TRUE
LIFE-Heart	5855	C16:1	NT-proBNP (pg/ml)	0.105182	0.0105657	9.95504	0.0166501	3.66018e-23	1.06145e-21	7.27853e-21	TRUE
LIFE-Adult	9623	C16:1	NT-proBNP (pg/ml)	0.0963288	0.0141053	6.82928	0.00482425	9.05025e-12	2.03631e-11	7.41652e-14	TRUE
LIFE-Heart	3040	C16:1	Number of plaques	0.0567942	0.0116491	4.8754	0.00776333	1.14166e-06	6.6216e-06	7.27853e-21	TRUE
LIFE-Adult	9237	C16:1	Number of plaques	0.0671588	0.00867314	7.74331	0.00645068	1.07062e-14	4.81779e-14	7.41652e-14	TRUE
LIFE-Heart	3099	C16:1	Peripheral artery disease	0.263382	0.0502924	5.23701	0.00877803	1.74105e-07	1.26226e-06	7.27853e-21	TRUE
LIFE-Adult	8723	C16:1	Peripheral artery disease	0.138382	0.0423462	3.26787	0.00122302	0.00108778	0.00139858	7.41652e-14	TRUE
LIFE-Heart	5860	C16:1	Main stem stenosis	0.15949	0.0443807	3.59367	0.00219974	0.000328728	0.000794426	7.27853e-21	TRUE
LIFE-Heart	5749	C16:1	CAD score	0.06594	0.0251613	2.62069	0.00119364	0.00879821	0.0122721	7.27853e-21	TRUE
LIFE-Heart	5686	C16:1	Valvular disease	0.216666	0.0536731	4.03676	0.0028587	5.49068e-05	0.000176922	7.27853e-21	TRUE
LIFE-Heart	3040	C16:1	Any plaques	0.0923045	0.0328437	2.81042	0.00259315	0.00497939	0.00802235	7.27853e-21	TRUE
LIFE-Adult	9237	C16:1	Any plaques	0.128075	0.0184678	6.93507	0.00518094	4.33289e-12	1.29987e-11	7.41652e-14	TRUE
LIFE-Heart	3039	C16:1OH	Ankle brachial index	-0.0165702	0.0111176	-1.49045	0.00073092	0.136211	0.329177	0.00656507	FALSE
LIFE-Adult	8685	C16:1OH	Ankle brachial index	0.0219219	0.0101724	2.15504	0.000534576	0.0311859	0.0467788	1.1457e-05	TRUE
LIFE-Adult	8580	C16:1OH	Brachial-ankle pulse wave velocity	0.0429045	0.0090288	4.75196	0.00262553	2.0473e-06	9.21285e-06	1.1457e-05	TRUE
LIFE-Adult	3935	C16:1OH	Brachial-femoral pulse wave velocity	0.0012096	0.0130635	0.0925943	2.17993e-06	0.926231	0.968573	1.1457e-05	FALSE
LIFE-Heart	5749	C16:1OH	Number of vessel disease (50% stenosis)	0.0236792	0.010004	2.36697	0.000973911	0.0179676	0.0868433	0.00656507	FALSE
LIFE-Adult	8200	C16:1OH	carotid-femoral pulse wave velocity	0.00292418	0.00926229	0.315709	1.21579e-05	0.752232	0.967155	1.1457e-05	FALSE
LIFE-Heart	2970	C16:1OH	Carotid intima media thickness	0.0379368	0.0144894	2.61825	0.0023044	0.00888305	0.0515217	0.00656507	FALSE
LIFE-Adult	9317	C16:1OH	Carotid intima media thickness	0.0422125	0.00874777	4.82552	0.00249356	1.41858e-06	9.21285e-06	1.1457e-05	TRUE
LIFE-Heart	4701	C16:1OH	Aortic bulb (mm)	0.0259675	0.0116092	2.2368	0.00106362	0.025346	0.104663	0.00656507	FALSE
LIFE-Heart	1537	C16:1OH	Deceleration time (ms)	0.017588	0.0194357	0.904934	0.000533205	0.365642	0.514069	0.00656507	FALSE
LIFE-Heart	971	C16:1OH	End-diastolic volume (biplane, ml)	0.0182603	0.0262505	0.695614	0.00049911	0.486837	0.613838	0.00656507	FALSE
LIFE-Heart	1134	C16:1OH	Ejection Fraction (biplane, %)	0.00649103	0.0240229	0.270202	6.44915e-05	0.787054	0.870636	0.00656507	FALSE
LIFE-Heart	1317	C16:1OH	Ejection Fraction (%)	-0.00186291	0.0221812	-0.0839859	5.36395e-06	0.93308	0.934946	0.00656507	FALSE
LIFE-Heart	431	C16:1OH	E point-septal separation (mm)	-0.0114407	0.0390554	-0.292935	0.000199986	0.769713	0.870636	0.00656507	FALSE
LIFE-Heart	977	C16:1OH	End-systolic volume (biplane, ml)	0.0153467	0.0261944	0.585878	0.00035193	0.558093	0.674363	0.00656507	FALSE
LIFE-Heart	1111	C16:1OH	Flow Propagation Velocity (cm/s)	-0.0241797	0.0230413	-1.04941	0.000992034	0.294219	0.489505	0.00656507	FALSE
LIFE-Heart	4171	C16:1OH	Fractional shortening (%)	-0.01677	0.0123573	-1.35709	0.000441563	0.174826	0.389998	0.00656507	FALSE
LIFE-Heart	977	C16:1OH	Left ventricular mass (g)	0.0262836	0.0260759	1.00796	0.00104096	0.313722	0.489505	0.00656507	FALSE
LIFE-Heart	2491	C16:1OH	Left ventricular function	0.0372751	0.0177355	2.10172	0.00177156	0.0356779	0.114962	0.00656507	FALSE
LIFE-Heart	5347	C16:1OH	Left ventricular internal diameter end diastole	0.0179446	0.0109132	1.64431	0.000505594	0.10017	0.264085	0.00656507	FALSE
LIFE-Heart	4182	C16:1OH	Left ventricular internal diameter end systole	0.0270366	0.0123682	2.18598	0.00114188	0.0288725	0.104663	0.00656507	FALSE
LIFE-Heart	4683	C16:1OH	Back wall (M-mode, mm)	0.0411474	0.0116364	3.53609	0.00266409	0.00041003	0.00594543	0.00656507	TRUE
LIFE-Heart	1318	C16:1OH	Pulmonary venous flow diastolic (cm/s)	0.00173801	0.0212888	0.0816394	5.06456e-06	0.934946	0.934946	0.00656507	FALSE
LIFE-Heart	1318	C16:1OH	Pulmonary venous flow systolic (cm/s)	0.0210899	0.0212306	0.993375	0.000749281	0.32071	0.489505	0.00656507	FALSE
LIFE-Heart	5452	C16:1OH	Septum (mm)	0.0295881	0.0107749	2.74602	0.00138169	0.00605213	0.0438779	0.00656507	FALSE
LIFE-Heart	2399	C16:1OH	Tricuspid annular plane systolic excursion (mm)	0.0134067	0.0166939	0.803088	0.000268993	0.422004	0.556277	0.00656507	FALSE
LIFE-Heart	5855	C16:1OH	NT-proBNP (pg/ml)	0.0358288	0.00955678	3.74905	0.00239564	0.000179219	0.00519735	0.00656507	TRUE
LIFE-Adult	9623	C16:1OH	NT-proBNP (pg/ml)	0.0351024	0.0133957	2.62043	0.000713205	0.00879576	0.0197905	1.1457e-05	TRUE
LIFE-Heart	3040	C16:1OH	Number of plaques	0.0129307	0.0104968	1.23188	0.000499263	0.218091	0.45176	0.00656507	FALSE
LIFE-Adult	9237	C16:1OH	Number of plaques	0.0217705	0.00826901	2.63278	0.000750009	0.00848301	0.0197905	1.1457e-05	TRUE
LIFE-Heart	3099	C16:1OH	Peripheral artery disease	0.0883843	0.0455182	1.94173	0.00121593	0.0522598	0.151554	0.00656507	FALSE
LIFE-Adult	8723	C16:1OH	Peripheral artery disease	-0.00158735	0.0402887	-0.0393993	1.77996e-07	0.968573	0.968573	1.1457e-05	FALSE
LIFE-Heart	5860	C16:1OH	Main stem stenosis	0.0463444	0.0399033	1.16142	0.000230212	0.245519	0.47467	0.00656507	FALSE
LIFE-Heart	5749	C16:1OH	CAD score	-0.00542134	0.0226197	-0.239673	9.99526e-06	0.810592	0.870636	0.00656507	FALSE
LIFE-Heart	5686	C16:1OH	Valvular disease	0.135563	0.0484194	2.79976	0.00137718	0.00513126	0.0438779	0.00656507	FALSE
LIFE-Heart	3040	C16:1OH	Any plaques	0.0310696	0.0295199	1.0525	0.000364499	0.292655	0.489505	0.00656507	FALSE
LIFE-Adult	9237	C16:1OH	Any plaques	0.0411868	0.0175974	2.3405	0.000592822	0.0192789	0.0347021	1.1457e-05	TRUE
LIFE-Heart	3039	C16OH	Ankle brachial index	-0.0244336	0.00998069	-2.44809	0.00196948	0.014418	0.173528	0.180135	FALSE
LIFE-Adult	8685	C16OH	Ankle brachial index	-0.00283799	0.00839782	-0.337943	1.31526e-05	0.735414	0.735414	0.000600363	FALSE
LIFE-Adult	8580	C16OH	Brachial-ankle pulse wave velocity	0.0280192	0.00749068	3.74055	0.00162846	0.000184817	0.00055445	0.000600363	TRUE
LIFE-Adult	3935	C16OH	Brachial-femoral pulse wave velocity	0.00794201	0.0113141	0.701959	0.000125269	0.482747	0.54309	0.000600363	FALSE
LIFE-Heart	5749	C16OH	Number of vessel disease (50% stenosis)	0.015471	0.00868542	1.78126	0.000551788	0.0749232	0.266748	0.180135	FALSE
LIFE-Adult	8200	C16OH	carotid-femoral pulse wave velocity	0.01444	0.00762948	1.89266	0.000436766	0.058438	0.105188	0.000600363	FALSE
LIFE-Heart	2970	C16OH	Carotid intima media thickness	-0.00790174	0.0129785	-0.608832	0.000124876	0.542682	0.749418	0.180135	FALSE
LIFE-Adult	9317	C16OH	Carotid intima media thickness	0.0283026	0.00724237	3.90792	0.00163681	9.37522e-05	0.000513713	0.000600363	TRUE
LIFE-Heart	4701	C16OH	Aortic bulb (mm)	-0.000133879	0.010045	-0.0133279	3.78024e-08	0.989367	0.989367	0.180135	FALSE
LIFE-Heart	1537	C16OH	Deceleration time (ms)	-0.0103659	0.0181996	-0.56957	0.000211297	0.569053	0.750115	0.180135	FALSE
LIFE-Heart	971	C16OH	End-diastolic volume (biplane, ml)	0.0141227	0.0219726	0.642742	0.000426152	0.520543	0.749418	0.180135	FALSE
LIFE-Heart	1134	C16OH	Ejection Fraction (biplane, %)	-0.0309897	0.0205889	-1.50517	0.00199735	0.132561	0.349478	0.180135	FALSE
LIFE-Heart	1317	C16OH	Ejection Fraction (%)	-0.0039124	0.0188997	-0.207009	3.25866e-05	0.836035	0.865893	0.180135	FALSE
LIFE-Heart	431	C16OH	E point-septal separation (mm)	0.0103682	0.0324757	0.319261	0.000237537	0.749684	0.865893	0.180135	FALSE
LIFE-Heart	977	C16OH	End-systolic volume (biplane, ml)	0.0276186	0.0216869	1.27352	0.00166066	0.203139	0.433243	0.180135	FALSE
LIFE-Heart	1111	C16OH	Flow Propagation Velocity (cm/s)	0.00570309	0.0214859	0.265435	6.35267e-05	0.790724	0.865893	0.180135	FALSE
LIFE-Heart	4171	C16OH	Fractional shortening (%)	-0.00676509	0.0107536	-0.629099	9.49217e-05	0.529318	0.749418	0.180135	FALSE
LIFE-Heart	977	C16OH	Left ventricular mass (g)	0.0491807	0.0217449	2.26171	0.00521911	0.0239349	0.173528	0.180135	FALSE
LIFE-Heart	2491	C16OH	Left ventricular function	-0.00611827	0.0146481	-0.417684	7.00875e-05	0.676214	0.817092	0.180135	FALSE
LIFE-Heart	5347	C16OH	Left ventricular internal diameter end diastole	0.00428565	0.00942218	0.454847	3.87049e-05	0.649238	0.817092	0.180135	FALSE
LIFE-Heart	4182	C16OH	Left ventricular internal diameter end systole	0.0103749	0.0106494	0.974227	0.00022701	0.33	0.562942	0.180135	FALSE
LIFE-Heart	4683	C16OH	Back wall (M-mode, mm)	0.0196767	0.0101071	1.94681	0.000809017	0.0516171	0.249483	0.180135	FALSE
LIFE-Heart	1318	C16OH	Pulmonary venous flow diastolic (cm/s)	0.0271632	0.0196393	1.3831	0.00145152	0.166868	0.403265	0.180135	FALSE
LIFE-Heart	1318	C16OH	Pulmonary venous flow systolic (cm/s)	0.00430317	0.0196623	0.218854	3.63946e-05	0.826798	0.865893	0.180135	FALSE
LIFE-Heart	5452	C16OH	Septum (mm)	0.0258034	0.00937808	2.75145	0.00138716	0.00595273	0.172629	0.180135	FALSE
LIFE-Heart	2399	C16OH	Tricuspid annular plane systolic excursion (mm)	0.0138679	0.013952	0.993972	0.000412004	0.320337	0.562942	0.180135	FALSE
LIFE-Heart	5855	C16OH	NT-proBNP (pg/ml)	0.0151093	0.00829804	1.82082	0.000566123	0.0686849	0.266748	0.180135	FALSE
LIFE-Adult	9623	C16OH	NT-proBNP (pg/ml)	0.033965	0.0110964	3.06089	0.000972866	0.00221288	0.00497897	0.000600363	TRUE
LIFE-Heart	3040	C16OH	Number of plaques	0.0191951	0.00941974	2.03775	0.00136496	0.0416613	0.241635	0.180135	FALSE
LIFE-Adult	9237	C16OH	Number of plaques	0.0263402	0.00682389	3.86	0.00161079	0.000114158	0.000513713	0.000600363	TRUE
LIFE-Heart	3099	C16OH	Peripheral artery disease	0.070921	0.0408692	1.73532	0.000971393	0.082784	0.266748	0.180135	FALSE
LIFE-Adult	8723	C16OH	Peripheral artery disease	0.05242	0.0332872	1.57478	0.000284282	0.115344	0.148299	0.000600363	FALSE
LIFE-Heart	5860	C16OH	Main stem stenosis	0.0804452	0.034606	2.3246	0.000921609	0.0201274	0.173528	0.180135	FALSE
LIFE-Heart	5749	C16OH	CAD score	0.024658	0.0196315	1.25604	0.00027444	0.209152	0.433243	0.180135	FALSE
LIFE-Heart	5686	C16OH	Valvular disease	0.0483675	0.0419547	1.15285	0.00023377	0.249021	0.481441	0.180135	FALSE
LIFE-Heart	3040	C16OH	Any plaques	0.0445444	0.0264949	1.68124	0.000929542	0.0928186	0.269174	0.180135	FALSE
LIFE-Adult	9237	C16OH	Any plaques	0.0262774	0.01453	1.80849	0.00035403	0.0705631	0.105845	0.000600363	FALSE
LIFE-Heart	3039	C18	Ankle brachial index	-0.0393192	0.0127929	-3.07353	0.00310085	0.00213424	0.0041262	1.18774e-13	TRUE
LIFE-Adult	8680	C18	Ankle brachial index	0.049867	0.0116053	4.2969	0.00212309	1.75091e-05	3.15165e-05	1.20963e-29	TRUE
LIFE-Adult	8575	C18	Brachial-ankle pulse wave velocity	0.119366	0.0102422	11.6544	0.0155962	3.74112e-31	3.36701e-30	1.20963e-29	TRUE
LIFE-Adult	3933	C18	Brachial-femoral pulse wave velocity	0.00345567	0.0153487	0.225144	1.28948e-05	0.821879	0.821879	1.20963e-29	FALSE
LIFE-Heart	5747	C18	Number of vessel disease (50% stenosis)	0.0304133	0.0112405	2.70569	0.00127266	0.00683647	0.0110143	1.18774e-13	TRUE
LIFE-Adult	8195	C18	carotid-femoral pulse wave velocity	0.0267138	0.0105239	2.5384	0.000785841	0.0111545	0.0167318	1.20963e-29	TRUE
LIFE-Heart	2970	C18	Carotid intima media thickness	0.0769549	0.0165001	4.6639	0.0072755	3.23988e-06	9.39566e-06	1.18774e-13	TRUE
LIFE-Adult	9311	C18	Carotid intima media thickness	0.100646	0.00993923	10.1261	0.010895	5.62987e-24	2.53344e-23	1.20963e-29	TRUE
LIFE-Heart	4700	C18	Aortic bulb (mm)	0.093938	0.0129307	7.26472	0.0111089	4.35478e-13	6.31443e-12	1.18774e-13	TRUE
LIFE-Heart	1537	C18	Deceleration time (ms)	-0.0202902	0.0226743	-0.894853	0.000521397	0.371006	0.413815	1.18774e-13	FALSE
LIFE-Heart	971	C18	End-diastolic volume (biplane, ml)	0.127943	0.0285026	4.48883	0.0203706	8.02186e-06	1.93862e-05	1.18774e-13	TRUE
LIFE-Heart	1134	C18	Ejection Fraction (biplane, %)	-0.076837	0.0266492	-2.88328	0.00729034	0.00401008	0.00726827	1.18774e-13	TRUE
LIFE-Heart	1317	C18	Ejection Fraction (%)	-0.0526571	0.0242168	-2.17441	0.00358259	0.0298524	0.0412248	1.18774e-13	TRUE
LIFE-Heart	431	C18	E point-septal separation (mm)	0.0691886	0.042091	1.64379	0.00625902	0.100953	0.123677	1.18774e-13	FALSE
LIFE-Heart	977	C18	End-systolic volume (biplane, ml)	0.135428	0.0285988	4.73545	0.0224824	2.5096e-06	8.08649e-06	1.18774e-13	TRUE
LIFE-Heart	1111	C18	Flow Propagation Velocity (cm/s)	0.00445162	0.0267871	0.166185	2.49024e-05	0.868042	0.868042	1.18774e-13	FALSE
LIFE-Heart	4170	C18	Fractional shortening (%)	-0.0828924	0.0137664	-6.02134	0.00862376	1.87892e-09	1.36222e-08	1.18774e-13	TRUE
LIFE-Heart	977	C18	Left ventricular mass (g)	0.13758	0.0283581	4.85153	0.0235718	1.42558e-06	5.16773e-06	1.18774e-13	TRUE
LIFE-Heart	2489	C18	Left ventricular function	0.0196657	0.0193407	1.01681	0.000415547	0.309345	0.35884	1.18774e-13	FALSE
LIFE-Heart	5346	C18	Left ventricular internal diameter end diastole	0.081224	0.0121654	6.67664	0.00827259	2.69275e-11	2.60299e-10	1.18774e-13	TRUE
LIFE-Heart	4181	C18	Left ventricular internal diameter end systole	0.110165	0.0137008	8.04081	0.0152356	1.1519e-15	3.34051e-14	1.18774e-13	TRUE
LIFE-Heart	4682	C18	Back wall (M-mode, mm)	0.0755388	0.0129961	5.81241	0.00716709	6.56656e-09	3.17384e-08	1.18774e-13	TRUE
LIFE-Heart	1318	C18	Pulmonary venous flow diastolic (cm/s)	0.0397099	0.024292	1.63469	0.00202644	0.102353	0.123677	1.18774e-13	FALSE
LIFE-Heart	1318	C18	Pulmonary venous flow systolic (cm/s)	-0.0643725	0.0242732	-2.65201	0.00531592	0.00809769	0.0117416	1.18774e-13	TRUE
LIFE-Heart	5450	C18	Septum (mm)	0.071379	0.012058	5.91963	0.00639098	3.42375e-09	1.98577e-08	1.18774e-13	TRUE
LIFE-Heart	2398	C18	Tricuspid annular plane systolic excursion (mm)	-0.0382326	0.0184319	-2.07426	0.0017925	0.0381618	0.0503043	1.18774e-13	FALSE
LIFE-Heart	5853	C18	NT-proBNP (pg/ml)	0.0307192	0.0107561	2.85598	0.00139212	0.00430552	0.00734472	1.18774e-13	TRUE
LIFE-Adult	9617	C18	NT-proBNP (pg/ml)	-0.0133516	0.0152987	-0.872727	7.92087e-05	0.382834	0.482303	1.20963e-29	FALSE
LIFE-Heart	3040	C18	Number of plaques	0.0616568	0.0119543	5.15773	0.00868046	2.66005e-07	1.10202e-06	1.18774e-13	TRUE
LIFE-Adult	9231	C18	Number of plaques	0.0913438	0.00940121	9.71618	0.0101255	3.28633e-22	9.85898e-22	1.20963e-29	TRUE
LIFE-Heart	3099	C18	Peripheral artery disease	0.221259	0.0520574	4.25029	0.00579924	2.19793e-05	4.90306e-05	1.18774e-13	TRUE
LIFE-Adult	8718	C18	Peripheral artery disease	0.036437	0.0460394	0.791432	7.18586e-05	0.428714	0.482303	1.20963e-29	FALSE
LIFE-Heart	5858	C18	Main stem stenosis	0.0359111	0.0448701	0.800335	0.000109369	0.423549	0.454923	1.18774e-13	FALSE
LIFE-Heart	5747	C18	CAD score	0.0174847	0.0254192	0.687855	8.23508e-05	0.491572	0.509128	1.18774e-13	FALSE
LIFE-Heart	5684	C18	Valvular disease	0.145102	0.0542258	2.67588	0.0012586	0.0074746	0.0114086	1.18774e-13	TRUE
LIFE-Heart	3040	C18	Any plaques	0.15279	0.0336493	4.54065	0.00674078	5.82628e-06	1.53602e-05	1.18774e-13	TRUE
LIFE-Adult	9231	C18	Any plaques	0.183408	0.0200177	9.1623	0.0090141	6.16927e-20	1.38809e-19	1.20963e-29	TRUE
LIFE-Heart	3038	C18:1	Ankle brachial index	-0.0717521	0.0134905	-5.31871	0.00923173	1.12089e-07	2.16706e-07	1.8722e-22	TRUE
LIFE-Adult	8681	C18:1	Ankle brachial index	0.0110111	0.0115392	0.954237	0.000104905	0.33999	0.33999	1.99172e-50	FALSE
LIFE-Adult	8576	C18:1	Brachial-ankle pulse wave velocity	0.155018	0.0101219	15.3152	0.0266281	2.9659e-52	2.66931e-51	1.99172e-50	TRUE
LIFE-Adult	3934	C18:1	Brachial-femoral pulse wave velocity	0.041665	0.015207	2.73986	0.00190553	0.00617419	0.00694596	1.99172e-50	TRUE
LIFE-Heart	5748	C18:1	Number of vessel disease (50% stenosis)	0.0791169	0.0118948	6.65139	0.00764062	3.17203e-11	1.14986e-10	1.8722e-22	TRUE
LIFE-Adult	8196	C18:1	carotid-femoral pulse wave velocity	0.0493047	0.0104882	4.70097	0.00268973	2.63158e-06	4.35065e-06	1.99172e-50	TRUE
LIFE-Heart	2969	C18:1	Carotid intima media thickness	0.0648141	0.0175745	3.68795	0.00456317	0.000230122	0.000333677	1.8722e-22	TRUE
LIFE-Adult	9314	C18:1	Carotid intima media thickness	0.10496	0.00992027	10.5804	0.0118787	5.16167e-26	1.16138e-25	1.99172e-50	TRUE
LIFE-Heart	4700	C18:1	Aortic bulb (mm)	0.0828323	0.0137003	6.04601	0.00772074	1.5997e-09	4.63912e-09	1.8722e-22	TRUE
LIFE-Heart	1537	C18:1	Deceleration time (ms)	-0.0265932	0.0240494	-1.10578	0.000795938	0.268997	0.278604	1.8722e-22	FALSE
LIFE-Heart	970	C18:1	End-diastolic volume (biplane, ml)	0.159491	0.0299052	5.33321	0.0285447	1.20141e-07	2.17756e-07	1.8722e-22	TRUE
LIFE-Heart	1133	C18:1	Ejection Fraction (biplane, %)	-0.11707	0.0282517	-4.14381	0.0149552	3.6705e-05	5.91359e-05	1.8722e-22	TRUE
LIFE-Heart	1316	C18:1	Ejection Fraction (%)	-0.0887772	0.0261774	-3.39137	0.00867701	0.000716099	0.000902908	1.8722e-22	TRUE
LIFE-Heart	430	C18:1	E point-septal separation (mm)	0.128491	0.0440667	2.91583	0.0194777	0.00373386	0.00451174	1.8722e-22	TRUE
LIFE-Heart	976	C18:1	End-systolic volume (biplane, ml)	0.163116	0.0299261	5.45063	0.0295995	6.36078e-08	1.31759e-07	1.8722e-22	TRUE
LIFE-Heart	1111	C18:1	Flow Propagation Velocity (cm/s)	0.00209585	0.0286018	0.0732767	4.8417e-06	0.941599	0.941599	1.8722e-22	FALSE
LIFE-Heart	4170	C18:1	Fractional shortening (%)	-0.11937	0.0144969	-8.23419	0.0160069	2.3938e-16	1.3884e-15	1.8722e-22	TRUE
LIFE-Heart	976	C18:1	Left ventricular mass (g)	0.166504	0.0298516	5.57771	0.0309527	3.15683e-08	7.04217e-08	1.8722e-22	TRUE
LIFE-Heart	2491	C18:1	Left ventricular function	0.0562957	0.020468	2.75043	0.0030301	0.00599483	0.00668654	1.8722e-22	TRUE
LIFE-Heart	5346	C18:1	Left ventricular internal diameter end diastole	0.10385	0.0128669	8.07114	0.0120432	8.53129e-16	4.12346e-15	1.8722e-22	TRUE
LIFE-Heart	4181	C18:1	Left ventricular internal diameter end systole	0.149862	0.0144751	10.353	0.0250072	8.06981e-25	2.34024e-23	1.8722e-22	TRUE
LIFE-Heart	4682	C18:1	Back wall (M-mode, mm)	0.116475	0.0137764	8.45468	0.0150441	3.69439e-17	2.67843e-16	1.8722e-22	TRUE
LIFE-Heart	1318	C18:1	Pulmonary venous flow diastolic (cm/s)	0.0894418	0.0257578	3.47242	0.00907918	0.000532516	0.000725784	1.8722e-22	TRUE
LIFE-Heart	1318	C18:1	Pulmonary venous flow systolic (cm/s)	-0.0571236	0.0258166	-2.21267	0.00370651	0.0270914	0.0290982	1.8722e-22	TRUE
LIFE-Heart	5451	C18:1	Septum (mm)	0.118584	0.0127059	9.33297	0.0157339	1.46424e-20	1.41543e-19	1.8722e-22	TRUE
LIFE-Heart	2398	C18:1	Tricuspid annular plane systolic excursion (mm)	-0.0556031	0.0193947	-2.86692	0.00341867	0.00418108	0.00485006	1.8722e-22	TRUE
LIFE-Heart	5854	C18:1	NT-proBNP (pg/ml)	0.110926	0.0113441	9.77828	0.0160762	2.07037e-22	3.00203e-21	1.8722e-22	TRUE
LIFE-Adult	9619	C18:1	NT-proBNP (pg/ml)	0.0713617	0.0152465	4.68053	0.00227281	2.90043e-06	4.35065e-06	1.99172e-50	TRUE
LIFE-Heart	3039	C18:1	Number of plaques	0.0977247	0.0125907	7.76166	0.0194507	1.13671e-14	4.70924e-14	1.8722e-22	TRUE
LIFE-Adult	9234	C18:1	Number of plaques	0.112743	0.00935952	12.0458	0.0154741	3.61466e-33	1.6266e-32	1.99172e-50	TRUE
LIFE-Heart	3098	C18:1	Peripheral artery disease	0.316631	0.0550091	5.75597	0.010588	9.45659e-09	2.4931e-08	1.8722e-22	TRUE
LIFE-Adult	8719	C18:1	Peripheral artery disease	0.146247	0.0457062	3.19972	0.00117313	0.00138054	0.00177498	1.99172e-50	TRUE
LIFE-Heart	5859	C18:1	Main stem stenosis	0.186719	0.0476148	3.92144	0.00261865	8.90273e-05	0.000135884	1.8722e-22	TRUE
LIFE-Heart	5748	C18:1	CAD score	0.113737	0.0269447	4.22114	0.00309135	2.46821e-05	4.21048e-05	1.8722e-22	TRUE
LIFE-Heart	5685	C18:1	Valvular disease	0.198676	0.0574737	3.45682	0.00209828	0.000550594	0.000725784	1.8722e-22	TRUE
LIFE-Heart	3039	C18:1	Any plaques	0.201799	0.0355713	5.67307	0.0104861	1.53449e-08	3.70836e-08	1.8722e-22	TRUE
LIFE-Adult	9234	C18:1	Any plaques	0.224831	0.0199363	11.2774	0.0135889	2.63589e-29	7.90767e-29	1.99172e-50	TRUE
LIFE-Heart	3039	C18:1OH	Ankle brachial index	-0.0173521	0.00983149	-1.76496	0.00102466	0.0776716	0.21931	0.00372856	FALSE
LIFE-Adult	8685	C18:1OH	Ankle brachial index	0.00634524	0.00836811	0.758265	6.62129e-05	0.448313	0.504352	0.0201651	FALSE
LIFE-Adult	8580	C18:1OH	Brachial-ankle pulse wave velocity	0.0228979	0.00744315	3.07637	0.00110208	0.00210197	0.0189178	0.0201651	TRUE
LIFE-Adult	3935	C18:1OH	Brachial-femoral pulse wave velocity	0.0159038	0.0112446	1.41436	0.000508363	0.157336	0.236004	0.0201651	FALSE
LIFE-Heart	5749	C18:1OH	Number of vessel disease (50% stenosis)	0.00497286	0.00848859	0.585829	5.97139e-05	0.558013	0.747533	0.00372856	FALSE
LIFE-Adult	8200	C18:1OH	carotid-femoral pulse wave velocity	0.0126318	0.0075955	1.66307	0.00033726	0.0963374	0.173407	0.0201651	FALSE
LIFE-Heart	2970	C18:1OH	Carotid intima media thickness	0.0199283	0.0127406	1.56416	0.000823645	0.117887	0.262978	0.00372856	FALSE
LIFE-Adult	9317	C18:1OH	Carotid intima media thickness	0.0188829	0.00724626	2.60588	0.000728469	0.00917833	0.0413025	0.0201651	TRUE
LIFE-Heart	4701	C18:1OH	Aortic bulb (mm)	0.0306497	0.00990561	3.09417	0.00203329	0.00198523	0.0191905	0.00372856	TRUE
LIFE-Heart	1537	C18:1OH	Deceleration time (ms)	0.0120869	0.0180427	0.669905	0.000292275	0.503019	0.747533	0.00372856	FALSE
LIFE-Heart	971	C18:1OH	End-diastolic volume (biplane, ml)	0.000696892	0.0218128	0.0319488	1.05338e-06	0.974519	0.974519	0.00372856	FALSE
LIFE-Heart	1134	C18:1OH	Ejection Fraction (biplane, %)	0.0112711	0.0196873	0.572505	0.000289458	0.567094	0.747533	0.00372856	FALSE
LIFE-Heart	1317	C18:1OH	Ejection Fraction (%)	0.00406137	0.0185562	0.218869	3.64272e-05	0.826786	0.856314	0.00372856	FALSE
LIFE-Heart	431	C18:1OH	E point-septal separation (mm)	-0.0187508	0.0305593	-0.613586	0.000876826	0.539814	0.747533	0.00372856	FALSE
LIFE-Heart	977	C18:1OH	End-systolic volume (biplane, ml)	-0.0153656	0.0211506	-0.726484	0.000541019	0.467716	0.747533	0.00372856	FALSE
LIFE-Heart	1111	C18:1OH	Flow Propagation Velocity (cm/s)	-0.00718237	0.0211514	-0.339569	0.000103963	0.734245	0.856314	0.00372856	FALSE
LIFE-Heart	4171	C18:1OH	Fractional shortening (%)	-0.0201182	0.0106212	-1.89416	0.000859858	0.0582733	0.190078	0.00372856	FALSE
LIFE-Heart	977	C18:1OH	Left ventricular mass (g)	0.00597894	0.0214425	0.278836	7.97366e-05	0.78043	0.856314	0.00372856	FALSE
LIFE-Heart	2491	C18:1OH	Left ventricular function	-0.0173051	0.0142925	-1.21078	0.000588639	0.226095	0.437117	0.00372856	FALSE
LIFE-Heart	5347	C18:1OH	Left ventricular internal diameter end diastole	0.0202177	0.00922179	2.19238	0.000898448	0.0283951	0.164692	0.00372856	FALSE
LIFE-Heart	4182	C18:1OH	Left ventricular internal diameter end systole	0.0260157	0.010584	2.45803	0.00144335	0.0140105	0.101576	0.00372856	FALSE
LIFE-Heart	4683	C18:1OH	Back wall (M-mode, mm)	0.0322742	0.00994774	3.24438	0.00224362	0.00118535	0.0171876	0.00372856	TRUE
LIFE-Heart	1318	C18:1OH	Pulmonary venous flow diastolic (cm/s)	0.0164642	0.0193412	0.851248	0.000550322	0.394787	0.673459	0.00372856	FALSE
LIFE-Heart	1318	C18:1OH	Pulmonary venous flow systolic (cm/s)	0.00639062	0.0193486	0.330289	8.28891e-05	0.741234	0.856314	0.00372856	FALSE
LIFE-Heart	5452	C18:1OH	Septum (mm)	0.0356787	0.00915082	3.89896	0.00278158	9.77675e-05	0.00283526	0.00372856	TRUE
LIFE-Heart	2399	C18:1OH	Tricuspid annular plane systolic excursion (mm)	0.00347167	0.0137779	0.251973	2.64868e-05	0.801083	0.856314	0.00372856	FALSE
LIFE-Heart	5855	C18:1OH	NT-proBNP (pg/ml)	0.0153868	0.00812016	1.89489	0.000613089	0.058156	0.190078	0.00372856	FALSE
LIFE-Adult	9623	C18:1OH	NT-proBNP (pg/ml)	0.0095629	0.011096	0.861831	7.71952e-05	0.388802	0.499888	0.0201651	FALSE
LIFE-Heart	3040	C18:1OH	Number of plaques	0.0160372	0.00925367	1.73306	0.000987665	0.0831866	0.21931	0.00372856	FALSE
LIFE-Adult	9237	C18:1OH	Number of plaques	0.016415	0.00685047	2.39619	0.00062135	0.0165862	0.0497587	0.0201651	FALSE
LIFE-Heart	3099	C18:1OH	Peripheral artery disease	0.0757775	0.0401158	1.88897	0.00115082	0.0589897	0.190078	0.00372856	FALSE
LIFE-Adult	8723	C18:1OH	Peripheral artery disease	-0.0105282	0.033165	-0.31745	1.15552e-05	0.75091	0.75091	0.0201651	FALSE
LIFE-Heart	5860	C18:1OH	Main stem stenosis	0.0532227	0.033862	1.57175	0.000421537	0.116062	0.262978	0.00372856	FALSE
LIFE-Heart	5749	C18:1OH	CAD score	0.00623809	0.0191843	0.325166	1.83976e-05	0.745067	0.856314	0.00372856	FALSE
LIFE-Heart	5686	C18:1OH	Valvular disease	0.0792486	0.0410467	1.93069	0.000655371	0.0535709	0.190078	0.00372856	FALSE
LIFE-Heart	3040	C18:1OH	Any plaques	0.0333519	0.026028	1.28139	0.000540179	0.200156	0.414608	0.00372856	FALSE
LIFE-Adult	9237	C18:1OH	Any plaques	0.0318519	0.0145782	2.18489	0.000516653	0.0289218	0.065074	0.0201651	FALSE
LIFE-Heart	3039	C18:2	Ankle brachial index	-0.0288807	0.013214	-2.18562	0.00157044	0.0289196	0.0399366	5.90403e-08	TRUE
LIFE-Adult	8685	C18:2	Ankle brachial index	0.0214143	0.0114748	1.8662	0.000400932	0.0620476	0.0930714	2.06825e-21	FALSE
LIFE-Adult	8580	C18:2	Brachial-ankle pulse wave velocity	0.100004	0.0101464	9.85603	0.0111977	8.52885e-23	7.67596e-22	2.06825e-21	TRUE
LIFE-Adult	3935	C18:2	Brachial-femoral pulse wave velocity	0.0424588	0.0149372	2.84249	0.00205014	0.00449929	0.00809872	2.06825e-21	TRUE
LIFE-Heart	5749	C18:2	Number of vessel disease (50% stenosis)	0.0382909	0.0117412	3.26124	0.00184723	0.00111574	0.00248897	5.90403e-08	TRUE
LIFE-Adult	8200	C18:2	carotid-femoral pulse wave velocity	0.0149387	0.0104315	1.43208	0.000250102	0.15216	0.15216	2.06825e-21	FALSE
LIFE-Heart	2970	C18:2	Carotid intima media thickness	0.0565434	0.0170812	3.31027	0.00367843	0.000943204	0.00227941	5.90403e-08	TRUE
LIFE-Adult	9317	C18:2	Carotid intima media thickness	0.0731869	0.00987711	7.40975	0.00585965	1.3756e-13	3.09509e-13	2.06825e-21	TRUE
LIFE-Heart	4701	C18:2	Aortic bulb (mm)	0.0564866	0.013439	4.20318	0.00374559	2.68084e-05	0.000111063	5.90403e-08	TRUE
LIFE-Heart	1537	C18:2	Deceleration time (ms)	-0.00653466	0.0235527	-0.277448	5.01458e-05	0.781473	0.781473	5.90403e-08	FALSE
LIFE-Heart	971	C18:2	End-diastolic volume (biplane, ml)	0.077967	0.0294911	2.64375	0.00716134	0.00833187	0.0151015	5.90403e-08	TRUE
LIFE-Heart	1134	C18:2	Ejection Fraction (biplane, %)	-0.0660395	0.0273656	-2.41323	0.00511825	0.01597	0.0257294	5.90403e-08	TRUE
LIFE-Heart	1317	C18:2	Ejection Fraction (%)	0.0336396	0.0256534	1.31131	0.00130593	0.189981	0.220378	5.90403e-08	FALSE
LIFE-Heart	431	C18:2	E point-septal separation (mm)	0.0732841	0.0440062	1.66531	0.00642298	0.0965802	0.121775	5.90403e-08	FALSE
LIFE-Heart	977	C18:2	End-systolic volume (biplane, ml)	0.0696709	0.0294624	2.36474	0.00570269	0.0182376	0.0278364	5.90403e-08	TRUE
LIFE-Heart	1111	C18:2	Flow Propagation Velocity (cm/s)	-0.0110452	0.0276692	-0.399189	0.000143669	0.689831	0.714467	5.90403e-08	FALSE
LIFE-Heart	4171	C18:2	Fractional shortening (%)	-0.0769838	0.0142306	-5.40972	0.00697076	6.66628e-08	6.44407e-07	5.90403e-08	TRUE
LIFE-Heart	977	C18:2	Left ventricular mass (g)	0.0663715	0.02932	2.26369	0.00522822	0.0238121	0.0345275	5.90403e-08	TRUE
LIFE-Heart	2491	C18:2	Left ventricular function	0.0245403	0.0204274	1.20134	0.000579501	0.229734	0.256242	5.90403e-08	FALSE
LIFE-Heart	5347	C18:2	Left ventricular internal diameter end diastole	0.0688215	0.0126418	5.44396	0.00551417	5.4435e-08	6.44407e-07	5.90403e-08	TRUE
LIFE-Heart	4182	C18:2	Left ventricular internal diameter end systole	0.0874578	0.0142812	6.12397	0.00889222	9.96729e-10	2.89051e-08	5.90403e-08	TRUE
LIFE-Heart	4683	C18:2	Back wall (M-mode, mm)	0.0689366	0.0134881	5.11091	0.00554933	3.33381e-07	2.41701e-06	5.90403e-08	TRUE
LIFE-Heart	1318	C18:2	Pulmonary venous flow diastolic (cm/s)	0.0375044	0.0250894	1.49483	0.00169508	0.135199	0.163365	5.90403e-08	FALSE
LIFE-Heart	1318	C18:2	Pulmonary venous flow systolic (cm/s)	-0.0523617	0.0250774	-2.08801	0.00330196	0.036989	0.0487582	5.90403e-08	FALSE
LIFE-Heart	5452	C18:2	Septum (mm)	0.0533047	0.0125655	4.24216	0.00329113	2.2505e-05	0.000111063	5.90403e-08	TRUE
LIFE-Heart	2399	C18:2	Tricuspid annular plane systolic excursion (mm)	-0.047614	0.0190059	-2.50522	0.0026115	0.0123033	0.0209879	5.90403e-08	TRUE
LIFE-Heart	5855	C18:2	NT-proBNP (pg/ml)	0.042341	0.011216	3.77505	0.00242891	0.000161559	0.000468521	5.90403e-08	TRUE
LIFE-Adult	9623	C18:2	NT-proBNP (pg/ml)	0.0251557	0.0151664	1.65864	0.000285865	0.0972205	0.109373	2.06825e-21	FALSE
LIFE-Heart	3040	C18:2	Number of plaques	0.0479472	0.0123235	3.8907	0.00495803	0.0001021	0.000328989	5.90403e-08	TRUE
LIFE-Adult	9237	C18:2	Number of plaques	0.0839361	0.00932729	8.99898	0.00869277	2.72982e-19	1.22842e-18	2.06825e-21	TRUE
LIFE-Heart	3099	C18:2	Peripheral artery disease	0.179829	0.053827	3.34087	0.00359101	0.000845049	0.00222786	5.90403e-08	TRUE
LIFE-Adult	8723	C18:2	Peripheral artery disease	0.0776253	0.0454551	1.70774	0.000334295	0.0877211	0.109373	2.06825e-21	FALSE
LIFE-Heart	5860	C18:2	Main stem stenosis	0.0509363	0.0468374	1.08751	0.000201852	0.276855	0.297362	5.90403e-08	FALSE
LIFE-Heart	5749	C18:2	CAD score	0.0849929	0.0265356	3.20297	0.00178193	0.00136758	0.00283285	5.90403e-08	TRUE
LIFE-Heart	5686	C18:2	Valvular disease	0.152956	0.0565591	2.70436	0.00128504	0.00686396	0.0132703	5.90403e-08	TRUE
LIFE-Heart	3040	C18:2	Any plaques	0.136572	0.0346527	3.94118	0.00508685	8.29103e-05	0.00030055	5.90403e-08	TRUE
LIFE-Adult	9237	C18:2	Any plaques	0.157024	0.0198678	7.90345	0.00671845	3.02375e-15	9.07126e-15	2.06825e-21	TRUE
LIFE-Heart	3039	C18:2OH	Ankle brachial index	-0.011419	0.00958246	-1.19166	0.000467366	0.233488	0.677115	0.301778	FALSE
LIFE-Adult	8685	C18:2OH	Ankle brachial index	-0.00588562	0.00832717	-0.706797	5.75301e-05	0.479711	0.514979	0.0103585	FALSE
LIFE-Adult	8580	C18:2OH	Brachial-ankle pulse wave velocity	0.0243183	0.00742254	3.27628	0.00124978	0.00105602	0.00950418	0.0103585	TRUE
LIFE-Adult	3935	C18:2OH	Brachial-femoral pulse wave velocity	-0.00730578	0.0112196	-0.651164	0.000107798	0.514979	0.514979	0.0103585	FALSE
LIFE-Heart	5749	C18:2OH	Number of vessel disease (50% stenosis)	0.00378227	0.00826869	0.457421	3.64061e-05	0.647386	0.816269	0.301778	FALSE
LIFE-Adult	8200	C18:2OH	carotid-femoral pulse wave velocity	0.0185776	0.00761711	2.43893	0.000725063	0.0147519	0.0442558	0.0103585	TRUE
LIFE-Heart	2970	C18:2OH	Carotid intima media thickness	0.0111306	0.0124546	0.893701	0.000269032	0.371554	0.769648	0.301778	FALSE
LIFE-Adult	9317	C18:2OH	Carotid intima media thickness	0.0184816	0.00711975	2.59582	0.000722857	0.00945135	0.0425311	0.0103585	TRUE
LIFE-Heart	4701	C18:2OH	Aortic bulb (mm)	0.0014733	0.00971884	0.151592	4.89044e-06	0.879515	0.900054	0.301778	FALSE
LIFE-Heart	1537	C18:2OH	Deceleration time (ms)	0.0115109	0.0176851	0.650879	0.000275913	0.515222	0.773131	0.301778	FALSE
LIFE-Heart	971	C18:2OH	End-diastolic volume (biplane, ml)	0.0379411	0.021155	1.79348	0.00330851	0.0732073	0.295491	0.301778	FALSE
LIFE-Heart	1134	C18:2OH	Ejection Fraction (biplane, %)	-0.0159629	0.0193939	-0.823087	0.000598116	0.410632	0.773131	0.301778	FALSE
LIFE-Heart	1317	C18:2OH	Ejection Fraction (%)	-0.0241838	0.0179216	-1.34942	0.00138282	0.177435	0.571734	0.301778	FALSE
LIFE-Heart	431	C18:2OH	E point-septal separation (mm)	0.0198046	0.0301085	0.657773	0.00100753	0.511037	0.773131	0.301778	FALSE
LIFE-Heart	977	C18:2OH	End-systolic volume (biplane, ml)	0.0448504	0.0209557	2.14025	0.00467617	0.0325819	0.295491	0.301778	FALSE
LIFE-Heart	1111	C18:2OH	Flow Propagation Velocity (cm/s)	-0.00369535	0.0207861	-0.17778	2.84984e-05	0.858929	0.900054	0.301778	FALSE
LIFE-Heart	4171	C18:2OH	Fractional shortening (%)	-0.0199203	0.0103353	-1.9274	0.000890274	0.0539981	0.295491	0.301778	FALSE
LIFE-Heart	977	C18:2OH	Left ventricular mass (g)	0.0397046	0.0209678	1.8936	0.0036642	0.0585735	0.295491	0.301778	FALSE
LIFE-Heart	2491	C18:2OH	Left ventricular function	-0.00172611	0.0137423	-0.125606	6.3386e-06	0.900054	0.900054	0.301778	FALSE
LIFE-Heart	5347	C18:2OH	Left ventricular internal diameter end diastole	0.0180054	0.00902183	1.99576	0.000744637	0.0460109	0.295491	0.301778	FALSE
LIFE-Heart	4182	C18:2OH	Left ventricular internal diameter end systole	0.0187695	0.0102449	1.83208	0.000802352	0.0670103	0.295491	0.301778	FALSE
LIFE-Heart	4683	C18:2OH	Back wall (M-mode, mm)	0.0167665	0.00962301	1.74234	0.000648105	0.0815148	0.295491	0.301778	FALSE
LIFE-Heart	1318	C18:2OH	Pulmonary venous flow diastolic (cm/s)	-0.0137322	0.0190257	-0.721771	0.000395704	0.470564	0.773131	0.301778	FALSE
LIFE-Heart	1318	C18:2OH	Pulmonary venous flow systolic (cm/s)	-0.0200291	0.0190165	-1.05325	0.000842249	0.29242	0.751679	0.301778	FALSE
LIFE-Heart	5452	C18:2OH	Septum (mm)	0.00886926	0.00893084	0.993105	0.000180932	0.320703	0.751679	0.301778	FALSE
LIFE-Heart	2399	C18:2OH	Tricuspid annular plane systolic excursion (mm)	-0.00209347	0.0130542	-0.160368	1.07291e-05	0.872605	0.900054	0.301778	FALSE
LIFE-Heart	5855	C18:2OH	NT-proBNP (pg/ml)	0.0153025	0.00789992	1.93705	0.000640655	0.0527875	0.295491	0.301778	FALSE
LIFE-Adult	9623	C18:2OH	NT-proBNP (pg/ml)	0.0151069	0.0109453	1.38022	0.000197965	0.167552	0.301594	0.0103585	FALSE
LIFE-Heart	3040	C18:2OH	Number of plaques	0.00559228	0.00897336	0.623209	0.000127828	0.533194	0.773131	0.301778	FALSE
LIFE-Adult	9237	C18:2OH	Number of plaques	0.00560533	0.00672851	0.833071	7.5144e-05	0.404826	0.514979	0.0103585	FALSE
LIFE-Heart	3099	C18:2OH	Peripheral artery disease	0.0375255	0.0390752	0.960339	0.0002977	0.33696	0.751679	0.301778	FALSE
LIFE-Adult	8723	C18:2OH	Peripheral artery disease	-0.0260288	0.0329465	-0.790032	7.15636e-05	0.429531	0.514979	0.0103585	FALSE
LIFE-Heart	5860	C18:2OH	Main stem stenosis	-0.00785396	0.0329436	-0.238406	9.70247e-06	0.811574	0.900054	0.301778	FALSE
LIFE-Heart	5749	C18:2OH	CAD score	0.00916879	0.0186869	0.490653	4.1888e-05	0.62369	0.816269	0.301778	FALSE
LIFE-Heart	5686	C18:2OH	Valvular disease	0.0313984	0.0398654	0.787608	0.000109124	0.430959	0.773131	0.301778	FALSE
LIFE-Heart	3040	C18:2OH	Any plaques	0.00777562	0.0252351	0.308127	3.12505e-05	0.758007	0.900054	0.301778	FALSE
LIFE-Adult	9237	C18:2OH	Any plaques	0.0250215	0.0143161	1.74779	0.000330672	0.0805337	0.181201	0.0103585	FALSE
LIFE-Heart	3039	C18OH	Ankle brachial index	0.00264857	0.00895561	0.295744	2.87988e-05	0.767446	0.991724	0.0724411	FALSE
LIFE-Adult	8685	C18OH	Ankle brachial index	0.00404243	0.00759025	0.532583	3.26655e-05	0.594336	0.764147	0.038061	FALSE
LIFE-Adult	8580	C18OH	Brachial-ankle pulse wave velocity	0.0183616	0.00674528	2.72214	0.000863099	0.00649913	0.0360991	0.038061	TRUE
LIFE-Adult	3935	C18OH	Brachial-femoral pulse wave velocity	-0.000854605	0.0106993	-0.0798749	1.62217e-06	0.936341	0.936341	0.038061	FALSE
LIFE-Heart	5749	C18OH	Number of vessel disease (50% stenosis)	0.0195926	0.00751556	2.60694	0.00118115	0.00915922	0.0664044	0.0724411	FALSE
LIFE-Adult	8200	C18OH	carotid-femoral pulse wave velocity	0.00611047	0.00689376	0.886378	9.58272e-05	0.37544	0.56316	0.038061	FALSE
LIFE-Heart	2970	C18OH	Carotid intima media thickness	0.0085359	0.0117052	0.729238	0.000179142	0.465913	0.991724	0.0724411	FALSE
LIFE-Adult	9317	C18OH	Carotid intima media thickness	0.0145502	0.00658998	2.20793	0.000523071	0.0272733	0.061365	0.038061	FALSE
LIFE-Heart	4701	C18OH	Aortic bulb (mm)	0.00189633	0.0088798	0.213556	9.70537e-06	0.830903	0.991724	0.0724411	FALSE
LIFE-Heart	1537	C18OH	Deceleration time (ms)	-0.00216184	0.0172328	-0.125449	1.02523e-05	0.900184	0.991724	0.0724411	FALSE
LIFE-Heart	971	C18OH	End-diastolic volume (biplane, ml)	-0.000638812	0.017342	-0.0368361	1.4003e-06	0.970623	0.991724	0.0724411	FALSE
LIFE-Heart	1134	C18OH	Ejection Fraction (biplane, %)	-0.0042693	0.0156026	-0.273627	6.61367e-05	0.784421	0.991724	0.0724411	FALSE
LIFE-Heart	1317	C18OH	Ejection Fraction (%)	-0.0107307	0.0158192	-0.678333	0.000349791	0.49768	0.991724	0.0724411	FALSE
LIFE-Heart	431	C18OH	E point-septal separation (mm)	0.00189701	0.0237098	0.0800096	1.49218e-05	0.936267	0.991724	0.0724411	FALSE
LIFE-Heart	977	C18OH	End-systolic volume (biplane, ml)	-0.000183497	0.0176861	-0.0103752	1.10405e-07	0.991724	0.991724	0.0724411	FALSE
LIFE-Heart	1111	C18OH	Flow Propagation Velocity (cm/s)	0.034202	0.020552	1.66417	0.00249104	0.0963608	0.442487	0.0724411	FALSE
LIFE-Heart	4171	C18OH	Fractional shortening (%)	-0.00442357	0.00960399	-0.460597	5.08848e-05	0.645112	0.991724	0.0724411	FALSE
LIFE-Heart	977	C18OH	Left ventricular mass (g)	-0.00390385	0.0182494	-0.213917	4.69315e-05	0.830657	0.991724	0.0724411	FALSE
LIFE-Heart	2491	C18OH	Left ventricular function	0.00473275	0.012064	0.392303	6.18288e-05	0.694868	0.991724	0.0724411	FALSE
LIFE-Heart	5347	C18OH	Left ventricular internal diameter end diastole	0.0186765	0.00821523	2.2734	0.00096602	0.0230413	0.13364	0.0724411	FALSE
LIFE-Heart	4182	C18OH	Left ventricular internal diameter end systole	0.0150143	0.00952146	1.57689	0.000594524	0.114896	0.442487	0.0724411	FALSE
LIFE-Heart	4683	C18OH	Back wall (M-mode, mm)	0.00516301	0.00898011	0.574938	7.06111e-05	0.565361	0.991724	0.0724411	FALSE
LIFE-Heart	1318	C18OH	Pulmonary venous flow diastolic (cm/s)	0.0286363	0.018509	1.54716	0.00181562	0.122066	0.442487	0.0724411	FALSE
LIFE-Heart	1318	C18OH	Pulmonary venous flow systolic (cm/s)	-0.0021951	0.01854	-0.118398	1.06519e-05	0.90577	0.991724	0.0724411	FALSE
LIFE-Heart	5452	C18OH	Septum (mm)	0.00250337	0.00818435	0.305873	1.71664e-05	0.759713	0.991724	0.0724411	FALSE
LIFE-Heart	2399	C18OH	Tricuspid annular plane systolic excursion (mm)	0.0146943	0.0111702	1.31549	0.000721431	0.18847	0.546564	0.0724411	FALSE
LIFE-Heart	5855	C18OH	NT-proBNP (pg/ml)	0.0190611	0.00719106	2.65067	0.00119898	0.00805488	0.0664044	0.0724411	FALSE
LIFE-Adult	9623	C18OH	NT-proBNP (pg/ml)	0.019028	0.010094	1.88507	0.000369212	0.0594502	0.10701	0.038061	FALSE
LIFE-Heart	3040	C18OH	Number of plaques	0.00513165	0.00848959	0.604463	0.000120254	0.545581	0.991724	0.0724411	FALSE
LIFE-Adult	9237	C18OH	Number of plaques	0.0164971	0.00622127	2.65172	0.000760829	0.00802201	0.0360991	0.038061	TRUE
LIFE-Heart	3099	C18OH	Peripheral artery disease	-0.0132054	0.0366368	-0.360442	4.1948e-05	0.718541	0.991724	0.0724411	FALSE
LIFE-Adult	8723	C18OH	Peripheral artery disease	-0.00570195	0.0300425	-0.189796	4.13055e-06	0.849473	0.936341	0.038061	FALSE
LIFE-Heart	5860	C18OH	Main stem stenosis	0.0215915	0.0300437	0.718669	8.81596e-05	0.472374	0.991724	0.0724411	FALSE
LIFE-Heart	5749	C18OH	CAD score	0.0456986	0.0169843	2.69065	0.00125813	0.00715199	0.0664044	0.0724411	FALSE
LIFE-Heart	5686	C18OH	Valvular disease	0.109444	0.0365114	2.99753	0.00157829	0.00273358	0.0664044	0.0724411	FALSE
LIFE-Heart	3040	C18OH	Any plaques	-0.00632751	0.0238747	-0.26503	2.31203e-05	0.791004	0.991724	0.0724411	FALSE
LIFE-Adult	9237	C18OH	Any plaques	0.0323272	0.0132393	2.44175	0.000645189	0.0146347	0.0439041	0.038061	TRUE
LIFE-Heart	3039	C2	Ankle brachial index	-0.0934033	0.0122609	-7.61796	0.0187505	3.42067e-14	9.91995e-14	1.54487e-48	TRUE
LIFE-Adult	8685	C2	Ankle brachial index	-0.039468	0.0102667	-3.84427	0.0016991	0.000121775	0.000121775	2.50527e-79	TRUE
LIFE-Adult	8580	C2	Brachial-ankle pulse wave velocity	0.17295	0.0089319	19.3631	0.041878	8.64775e-82	5.16551e-81	2.50527e-79	TRUE
LIFE-Adult	3935	C2	Brachial-femoral pulse wave velocity	0.0915041	0.0135299	6.76312	0.0114961	1.54988e-11	1.74361e-11	2.50527e-79	TRUE
LIFE-Heart	5749	C2	Number of vessel disease (50% stenosis)	0.0895012	0.0106043	8.44008	0.0122434	3.97167e-17	1.6454e-16	1.54487e-48	TRUE
LIFE-Adult	8200	C2	carotid-femoral pulse wave velocity	0.0739455	0.00927841	7.96964	0.00768807	1.80548e-15	2.70823e-15	2.50527e-79	TRUE
LIFE-Heart	2970	C2	Carotid intima media thickness	0.0501938	0.0159798	3.14109	0.00331325	0.0016998	0.00205392	1.54487e-48	TRUE
LIFE-Adult	9317	C2	Carotid intima media thickness	0.129343	0.00875746	14.7695	0.0228821	8.19675e-49	1.84427e-48	2.50527e-79	TRUE
LIFE-Heart	4701	C2	Aortic bulb (mm)	0.0507586	0.0124451	4.07861	0.00352764	4.60556e-05	6.67806e-05	1.54487e-48	TRUE
LIFE-Heart	1537	C2	Deceleration time (ms)	-0.0019287	0.0225154	-0.0856612	4.78033e-06	0.931747	0.931747	1.54487e-48	FALSE
LIFE-Heart	971	C2	End-diastolic volume (biplane, ml)	0.087453	0.0267289	3.27186	0.0109268	0.00110616	0.00139472	1.54487e-48	TRUE
LIFE-Heart	1134	C2	Ejection Fraction (biplane, %)	-0.104321	0.0245914	-4.24216	0.0156487	2.39456e-05	3.65485e-05	1.54487e-48	TRUE
LIFE-Heart	1317	C2	Ejection Fraction (%)	-0.0668945	0.0227054	-2.94619	0.00655751	0.00327377	0.00379758	1.54487e-48	TRUE
LIFE-Heart	431	C2	E point-septal separation (mm)	0.069653	0.0392906	1.77276	0.00727235	0.0769774	0.0858594	1.54487e-48	FALSE
LIFE-Heart	977	C2	End-systolic volume (biplane, ml)	0.102426	0.026605	3.84989	0.0149741	0.000125872	0.000173823	1.54487e-48	TRUE
LIFE-Heart	1111	C2	Flow Propagation Velocity (cm/s)	0.0137951	0.0266846	0.516969	0.000240931	0.605281	0.626898	1.54487e-48	FALSE
LIFE-Heart	4171	C2	Fractional shortening (%)	-0.105301	0.0131975	-7.97886	0.0150407	1.89285e-15	6.09918e-15	1.54487e-48	TRUE
LIFE-Heart	977	C2	Left ventricular mass (g)	0.131729	0.0265012	4.97068	0.0247148	7.87876e-07	1.34402e-06	1.54487e-48	TRUE
LIFE-Heart	2491	C2	Left ventricular function	0.147341	0.0176435	8.35104	0.0272555	1.10817e-16	4.01711e-16	1.54487e-48	TRUE
LIFE-Heart	5347	C2	Left ventricular internal diameter end diastole	0.1094	0.0115412	9.47904	0.0165326	3.75935e-21	2.18042e-20	1.54487e-48	TRUE
LIFE-Heart	4182	C2	Left ventricular internal diameter end systole	0.144115	0.0130402	11.0516	0.0283899	5.24297e-28	7.6023e-27	1.54487e-48	TRUE
LIFE-Heart	4683	C2	Back wall (M-mode, mm)	0.122108	0.0123993	9.84797	0.0202978	1.15977e-22	8.40834e-22	1.54487e-48	TRUE
LIFE-Heart	1318	C2	Pulmonary venous flow diastolic (cm/s)	0.0870314	0.0240397	3.62031	0.00986127	0.000305415	0.000402593	1.54487e-48	TRUE
LIFE-Heart	1318	C2	Pulmonary venous flow systolic (cm/s)	-0.0393625	0.0241269	-1.63148	0.00201851	0.103028	0.11066	1.54487e-48	FALSE
LIFE-Heart	5452	C2	Septum (mm)	0.117505	0.0114016	10.306	0.0191162	1.11391e-24	1.07678e-23	1.54487e-48	TRUE
LIFE-Heart	2399	C2	Tricuspid annular plane systolic excursion (mm)	-0.10532	0.0170586	-6.17401	0.0156536	7.79544e-10	1.41292e-09	1.54487e-48	TRUE
LIFE-Heart	5855	C2	NT-proBNP (pg/ml)	0.153201	0.0100298	15.2746	0.0383339	1.10982e-51	3.21847e-50	1.54487e-48	TRUE
LIFE-Adult	9623	C2	NT-proBNP (pg/ml)	0.151223	0.0134909	11.2093	0.0128914	5.55086e-29	9.99155e-29	2.50527e-79	TRUE
LIFE-Heart	3040	C2	Number of plaques	0.103223	0.0114554	9.01086	0.0260309	3.53007e-19	1.7062e-18	1.54487e-48	TRUE
LIFE-Adult	9237	C2	Number of plaques	0.158605	0.00820382	19.3331	0.0388986	1.14789e-81	5.16551e-81	2.50527e-79	TRUE
LIFE-Heart	3099	C2	Peripheral artery disease	0.347339	0.0500877	6.93461	0.0152901	4.93748e-12	1.02276e-11	1.54487e-48	TRUE
LIFE-Adult	8723	C2	Peripheral artery disease	0.280253	0.0405826	6.90574	0.00543859	5.3437e-12	6.87047e-12	2.50527e-79	TRUE
LIFE-Heart	5860	C2	Main stem stenosis	0.19464	0.0425657	4.57271	0.00355672	4.91372e-06	7.91655e-06	1.54487e-48	TRUE
LIFE-Heart	5749	C2	CAD score	0.150768	0.0240313	6.27383	0.00680236	3.77999e-10	7.30799e-10	1.54487e-48	TRUE
LIFE-Heart	5686	C2	Valvular disease	0.362231	0.0513372	7.0559	0.00868288	1.9194e-12	4.63854e-12	1.54487e-48	TRUE
LIFE-Heart	3040	C2	Any plaques	0.226732	0.0323809	7.00202	0.0158821	3.09273e-12	6.89916e-12	1.54487e-48	TRUE
LIFE-Adult	9237	C2	Any plaques	0.303939	0.017524	17.3442	0.0315465	2.43791e-66	7.31372e-66	2.50527e-79	TRUE
LIFE-Heart	3039	C20:1	Ankle brachial index	-0.0163615	0.0109392	-1.49567	0.00073605	0.134844	0.17002	2.2754e-05	FALSE
LIFE-Adult	8685	C20:1	Ankle brachial index	-0.00733503	0.00927907	-0.790492	7.19604e-05	0.429262	0.48292	1.00152e-10	FALSE
LIFE-Adult	8580	C20:1	Brachial-ankle pulse wave velocity	0.0497054	0.00823387	6.03669	0.0042303	1.63838e-09	7.37271e-09	1.00152e-10	TRUE
LIFE-Adult	3935	C20:1	Brachial-femoral pulse wave velocity	0.00772138	0.0120334	0.64166	0.000104675	0.521131	0.521131	1.00152e-10	FALSE
LIFE-Heart	5749	C20:1	Number of vessel disease (50% stenosis)	0.0182048	0.00984999	1.8482	0.000594018	0.0646245	0.0892433	2.2754e-05	FALSE
LIFE-Adult	8200	C20:1	carotid-femoral pulse wave velocity	0.0109276	0.00840739	1.29976	0.000206028	0.193721	0.24907	1.00152e-10	FALSE
LIFE-Heart	2970	C20:1	Carotid intima media thickness	0.0543028	0.0141084	3.84896	0.00496662	0.00012112	0.000585415	2.2754e-05	TRUE
LIFE-Adult	9317	C20:1	Carotid intima media thickness	0.0461299	0.00798176	5.77941	0.00357297	7.73735e-09	2.32121e-08	1.00152e-10	TRUE
LIFE-Heart	4701	C20:1	Aortic bulb (mm)	0.0437136	0.011356	3.84937	0.00314346	0.000119994	0.000585415	2.2754e-05	TRUE
LIFE-Heart	1537	C20:1	Deceleration time (ms)	-0.00380981	0.0189461	-0.201086	2.63418e-05	0.840658	0.840658	2.2754e-05	FALSE
LIFE-Heart	971	C20:1	End-diastolic volume (biplane, ml)	0.0809144	0.0253344	3.19385	0.0104173	0.00144919	0.00420266	2.2754e-05	TRUE
LIFE-Heart	1134	C20:1	Ejection Fraction (biplane, %)	-0.0436346	0.0234645	-1.8596	0.00304556	0.0632014	0.0892433	2.2754e-05	FALSE
LIFE-Heart	1317	C20:1	Ejection Fraction (%)	-0.0424266	0.0219342	-1.93426	0.00283708	0.0532952	0.0813454	2.2754e-05	FALSE
LIFE-Heart	431	C20:1	E point-septal separation (mm)	0.107848	0.0383704	2.81072	0.0180823	0.00516948	0.0115319	2.2754e-05	TRUE
LIFE-Heart	977	C20:1	End-systolic volume (biplane, ml)	0.105471	0.0252664	4.17435	0.0175582	3.25547e-05	0.00027493	2.2754e-05	TRUE
LIFE-Heart	1111	C20:1	Flow Propagation Velocity (cm/s)	0.00559996	0.0220248	0.254257	5.82894e-05	0.799344	0.827892	2.2754e-05	FALSE
LIFE-Heart	4171	C20:1	Fractional shortening (%)	-0.0459284	0.0121106	-3.79242	0.00343799	0.0001513	0.000626812	2.2754e-05	TRUE
LIFE-Heart	977	C20:1	Left ventricular mass (g)	0.0564182	0.0254091	2.22039	0.00503111	0.0266215	0.0551445	2.2754e-05	FALSE
LIFE-Heart	2491	C20:1	Left ventricular function	-0.0201383	0.0174391	-1.15477	0.000535471	0.248294	0.300022	2.2754e-05	FALSE
LIFE-Heart	5347	C20:1	Left ventricular internal diameter end diastole	0.0344308	0.0106637	3.22879	0.00194664	0.00125067	0.00402992	2.2754e-05	TRUE
LIFE-Heart	4182	C20:1	Left ventricular internal diameter end systole	0.0574803	0.0120883	4.75504	0.00538008	2.05091e-06	2.97383e-05	2.2754e-05	TRUE
LIFE-Heart	4683	C20:1	Back wall (M-mode, mm)	0.057135	0.01135	5.03393	0.00538432	4.9856e-07	1.44583e-05	2.2754e-05	TRUE
LIFE-Heart	1318	C20:1	Pulmonary venous flow diastolic (cm/s)	0.0425591	0.0203976	2.08648	0.00329714	0.0371275	0.0672935	2.2754e-05	FALSE
LIFE-Heart	1318	C20:1	Pulmonary venous flow systolic (cm/s)	0.0135568	0.0204029	0.664453	0.000335372	0.506517	0.58756	2.2754e-05	FALSE
LIFE-Heart	5452	C20:1	Septum (mm)	0.0389725	0.0105671	3.6881	0.00248958	0.000228134	0.000826985	2.2754e-05	TRUE
LIFE-Heart	2399	C20:1	Tricuspid annular plane systolic excursion (mm)	-0.0289338	0.0161355	-1.79317	0.00133966	0.0730717	0.0963218	2.2754e-05	FALSE
LIFE-Heart	5855	C20:1	NT-proBNP (pg/ml)	0.0387601	0.00940105	4.12296	0.00289587	3.79213e-05	0.00027493	2.2754e-05	TRUE
LIFE-Adult	9623	C20:1	NT-proBNP (pg/ml)	0.0661496	0.012229	5.40923	0.00303202	6.48144e-08	1.16666e-07	1.00152e-10	TRUE
LIFE-Heart	3040	C20:1	Number of plaques	0.0313407	0.0102328	3.06277	0.00307823	0.00221223	0.00534622	2.2754e-05	TRUE
LIFE-Adult	9237	C20:1	Number of plaques	0.0518037	0.0075336	6.87634	0.00509402	6.53911e-12	5.8852e-11	1.00152e-10	TRUE
LIFE-Heart	3099	C20:1	Peripheral artery disease	0.0893953	0.0445674	2.00584	0.00129744	0.0449599	0.0766964	2.2754e-05	FALSE
LIFE-Adult	8723	C20:1	Peripheral artery disease	0.0674423	0.0367552	1.83491	0.000385917	0.0665535	0.0998302	1.00152e-10	FALSE
LIFE-Heart	5860	C20:1	Main stem stenosis	0.0776394	0.039237	1.97873	0.000667933	0.0478934	0.0771616	2.2754e-05	FALSE
LIFE-Heart	5749	C20:1	CAD score	0.00633305	0.0222671	0.284413	1.40751e-05	0.776104	0.827892	2.2754e-05	FALSE
LIFE-Heart	5686	C20:1	Valvular disease	0.148972	0.0474419	3.1401	0.00173173	0.00169755	0.00447536	2.2754e-05	TRUE
LIFE-Heart	3040	C20:1	Any plaques	0.0629701	0.0287973	2.18667	0.00157143	0.0288429	0.0557629	2.2754e-05	FALSE
LIFE-Adult	9237	C20:1	Any plaques	0.0917822	0.0160437	5.72076	0.00353129	1.09353e-08	2.46044e-08	1.00152e-10	TRUE
LIFE-Heart	3039	C20:2	Ankle brachial index	-0.0122568	0.0106122	-1.15497	0.000439043	0.248193	0.472898	0.0011804	FALSE
LIFE-Adult	8685	C20:2	Ankle brachial index	-0.0103626	0.00894987	-1.15785	0.000154372	0.246957	0.317516	0.000427167	FALSE
LIFE-Adult	8580	C20:2	Brachial-ankle pulse wave velocity	0.0327221	0.00796369	4.10891	0.00196432	4.01234e-05	0.00036111	0.000427167	TRUE
LIFE-Adult	3935	C20:2	Brachial-femoral pulse wave velocity	-0.00224265	0.0117164	-0.191412	9.31557e-06	0.848213	0.848213	0.000427167	FALSE
LIFE-Heart	5749	C20:2	Number of vessel disease (50% stenosis)	-0.000254753	0.00946251	-0.0269224	1.26121e-07	0.978523	0.99722	0.0011804	FALSE
LIFE-Adult	8200	C20:2	carotid-femoral pulse wave velocity	0.0125401	0.00813897	1.54074	0.000289485	0.123418	0.185127	0.000427167	FALSE
LIFE-Heart	2970	C20:2	Carotid intima media thickness	0.0228011	0.0136959	1.66481	0.00093295	0.0960568	0.278565	0.0011804	FALSE
LIFE-Adult	9317	C20:2	Carotid intima media thickness	0.0135713	0.00773533	1.75446	0.000330338	0.0793852	0.142893	0.000427167	FALSE
LIFE-Heart	4701	C20:2	Aortic bulb (mm)	0.0198355	0.0108227	1.83277	0.000714329	0.0669007	0.278565	0.0011804	FALSE
LIFE-Heart	1537	C20:2	Deceleration time (ms)	-0.00959873	0.0189886	-0.505501	0.000166442	0.613279	0.84691	0.0011804	FALSE
LIFE-Heart	971	C20:2	End-diastolic volume (biplane, ml)	-0.00073606	0.023885	-0.0308169	9.8006e-07	0.975422	0.99722	0.0011804	FALSE
LIFE-Heart	1134	C20:2	Ejection Fraction (biplane, %)	-0.052137	0.0217521	-2.39687	0.00504944	0.0166973	0.242111	0.0011804	FALSE
LIFE-Heart	1317	C20:2	Ejection Fraction (%)	-0.0332602	0.0207249	-1.60484	0.00195475	0.108768	0.286752	0.0011804	FALSE
LIFE-Heart	431	C20:2	E point-septal separation (mm)	0.137738	0.0326038	4.22459	0.0399401	2.92556e-05	0.000848414	0.0011804	TRUE
LIFE-Heart	977	C20:2	End-systolic volume (biplane, ml)	0.0123725	0.0239845	0.515855	0.000272855	0.606073	0.84691	0.0011804	FALSE
LIFE-Heart	1111	C20:2	Flow Propagation Velocity (cm/s)	0.00605333	0.0224597	0.26952	6.54971e-05	0.78758	0.993035	0.0011804	FALSE
LIFE-Heart	4171	C20:2	Fractional shortening (%)	-0.0196121	0.0115371	-1.69992	0.000692665	0.0892209	0.278565	0.0011804	FALSE
LIFE-Heart	977	C20:2	Left ventricular mass (g)	0.0322225	0.023508	1.37071	0.00192331	0.170782	0.380975	0.0011804	FALSE
LIFE-Heart	2491	C20:2	Left ventricular function	0.0275904	0.0165546	1.66663	0.00111473	0.0957139	0.278565	0.0011804	FALSE
LIFE-Heart	5347	C20:2	Left ventricular internal diameter end diastole	0.0173682	0.0102241	1.69874	0.000539599	0.0894265	0.278565	0.0011804	FALSE
LIFE-Heart	4182	C20:2	Left ventricular internal diameter end systole	0.0249804	0.0114705	2.1778	0.00113336	0.0294763	0.258648	0.0011804	FALSE
LIFE-Heart	4683	C20:2	Back wall (M-mode, mm)	0.0118222	0.0108788	1.08672	0.000252225	0.277216	0.472898	0.0011804	FALSE
LIFE-Heart	1318	C20:2	Pulmonary venous flow diastolic (cm/s)	7.10108e-05	0.0203753	0.00348514	9.22962e-09	0.99722	0.99722	0.0011804	FALSE
LIFE-Heart	1318	C20:2	Pulmonary venous flow systolic (cm/s)	0.00158242	0.0203806	0.0776438	4.58095e-06	0.938123	0.99722	0.0011804	FALSE
LIFE-Heart	5452	C20:2	Septum (mm)	0.0116409	0.010142	1.14779	0.00024167	0.251106	0.472898	0.0011804	FALSE
LIFE-Heart	2399	C20:2	Tricuspid annular plane systolic excursion (mm)	-0.0169328	0.0151231	-1.11967	0.000522735	0.262969	0.472898	0.0011804	FALSE
LIFE-Heart	5855	C20:2	NT-proBNP (pg/ml)	0.0136232	0.00904613	1.50597	0.000387335	0.132129	0.319311	0.0011804	FALSE
LIFE-Adult	9623	C20:2	NT-proBNP (pg/ml)	0.0221167	0.0118397	1.86801	0.00036256	0.0617911	0.13903	0.000427167	FALSE
LIFE-Heart	3040	C20:2	Number of plaques	0.0188947	0.00986541	1.91524	0.00120597	0.0555552	0.278565	0.0011804	FALSE
LIFE-Adult	9237	C20:2	Number of plaques	0.017626	0.00730094	2.41421	0.000630722	0.0157888	0.0473665	0.000427167	TRUE
LIFE-Heart	3099	C20:2	Peripheral artery disease	0.0387924	0.043221	0.897535	0.000260045	0.369503	0.595311	0.0011804	FALSE
LIFE-Adult	8723	C20:2	Peripheral artery disease	0.0352985	0.035449	0.995754	0.000113681	0.319398	0.359322	0.000427167	FALSE
LIFE-Heart	5860	C20:2	Main stem stenosis	0.0792354	0.0377115	2.10109	0.000753032	0.0356756	0.258648	0.0011804	FALSE
LIFE-Heart	5749	C20:2	CAD score	-0.00292807	0.0213849	-0.136922	3.26216e-06	0.891097	0.99722	0.0011804	FALSE
LIFE-Heart	5686	C20:2	Valvular disease	0.0348758	0.0456734	0.76359	0.00010257	0.445143	0.679429	0.0011804	FALSE
LIFE-Heart	3040	C20:2	Any plaques	0.00587119	0.027759	0.211506	1.47249e-05	0.832506	0.99722	0.0011804	FALSE
LIFE-Adult	9237	C20:2	Any plaques	0.0400462	0.0155353	2.57775	0.000719004	0.00996003	0.0448201	0.000427167	TRUE
LIFE-Heart	3039	C20:3	Ankle brachial index	-0.0145987	0.0103221	-1.41432	0.000658209	0.157371	0.370152	0.124802	FALSE
LIFE-Adult	8685	C20:3	Ankle brachial index	0.00709822	0.00821913	0.863622	8.58895e-05	0.38782	0.450912	0.000837537	FALSE
LIFE-Adult	8580	C20:3	Brachial-ankle pulse wave velocity	0.0287294	0.00728331	3.94455	0.00181059	8.05878e-05	0.00072529	0.000837537	TRUE
LIFE-Adult	3935	C20:3	Brachial-femoral pulse wave velocity	-0.00946308	0.0115471	-0.819518	0.000170733	0.412541	0.450912	0.000837537	FALSE
LIFE-Heart	5749	C20:3	Number of vessel disease (50% stenosis)	0.01317	0.00870083	1.51365	0.00039851	0.130169	0.370152	0.124802	FALSE
LIFE-Adult	8200	C20:3	carotid-femoral pulse wave velocity	0.0114342	0.00747298	1.53008	0.000285493	0.126036	0.189054	0.000837537	FALSE
LIFE-Heart	2970	C20:3	Carotid intima media thickness	0.0254574	0.0133642	1.90489	0.00122108	0.0568913	0.206231	0.124802	FALSE
LIFE-Adult	9317	C20:3	Carotid intima media thickness	0.0174324	0.00705133	2.47222	0.000655701	0.0134455	0.0242018	0.000837537	TRUE
LIFE-Heart	4701	C20:3	Aortic bulb (mm)	0.0206079	0.0102925	2.00224	0.000852421	0.0453168	0.187741	0.124802	FALSE
LIFE-Heart	1537	C20:3	Deceleration time (ms)	-0.0490952	0.0180635	-2.71792	0.00478938	0.00664332	0.117002	0.124802	FALSE
LIFE-Heart	971	C20:3	End-diastolic volume (biplane, ml)	-0.000969136	0.024172	-0.0400934	1.6589e-06	0.968027	0.992092	0.124802	FALSE
LIFE-Heart	1134	C20:3	Ejection Fraction (biplane, %)	0.00290401	0.0216339	0.134234	1.59174e-05	0.893241	0.959407	0.124802	FALSE
LIFE-Heart	1317	C20:3	Ejection Fraction (%)	0.015435	0.0201533	0.765879	0.000445863	0.443885	0.68341	0.124802	FALSE
LIFE-Heart	431	C20:3	E point-septal separation (mm)	-0.0109726	0.0341155	-0.321631	0.000241077	0.747889	0.867887	0.124802	FALSE
LIFE-Heart	977	C20:3	End-systolic volume (biplane, ml)	0.000240113	0.0242187	0.00991435	1.00815e-07	0.992092	0.992092	0.124802	FALSE
LIFE-Heart	1111	C20:3	Flow Propagation Velocity (cm/s)	0.0288366	0.0213303	1.35191	0.00164531	0.17668	0.370152	0.124802	FALSE
LIFE-Heart	4171	C20:3	Fractional shortening (%)	-0.00829932	0.0109311	-0.759241	0.000138251	0.447752	0.68341	0.124802	FALSE
LIFE-Heart	977	C20:3	Left ventricular mass (g)	-0.00478657	0.0241736	-0.198008	4.0211e-05	0.84308	0.940358	0.124802	FALSE
LIFE-Heart	2491	C20:3	Left ventricular function	-0.00629186	0.0141546	-0.44451	7.93788e-05	0.656712	0.867887	0.124802	FALSE
LIFE-Heart	5347	C20:3	Left ventricular internal diameter end diastole	0.0222412	0.00952133	2.33594	0.00101984	0.0195313	0.16911	0.124802	FALSE
LIFE-Heart	4182	C20:3	Left ventricular internal diameter end systole	0.0289055	0.010906	2.65043	0.00167776	0.00806912	0.117002	0.124802	FALSE
LIFE-Heart	4683	C20:3	Back wall (M-mode, mm)	0.0168126	0.0102765	1.63602	0.000571463	0.101904	0.328356	0.124802	FALSE
LIFE-Heart	1318	C20:3	Pulmonary venous flow diastolic (cm/s)	0.0394943	0.019336	2.04252	0.00316012	0.0412985	0.187741	0.124802	FALSE
LIFE-Heart	1318	C20:3	Pulmonary venous flow systolic (cm/s)	-0.00766466	0.0193528	-0.396049	0.000119177	0.692133	0.867887	0.124802	FALSE
LIFE-Heart	5452	C20:3	Septum (mm)	0.0114466	0.00942675	1.21426	0.000270466	0.2247	0.407268	0.124802	FALSE
LIFE-Heart	2399	C20:3	Tricuspid annular plane systolic excursion (mm)	-0.00941051	0.0142209	-0.661736	0.000182651	0.508204	0.736896	0.124802	FALSE
LIFE-Heart	5855	C20:3	NT-proBNP (pg/ml)	0.0181793	0.00833187	2.1819	0.000812711	0.0291569	0.16911	0.124802	FALSE
LIFE-Adult	9623	C20:3	NT-proBNP (pg/ml)	0.0316497	0.0108319	2.92189	0.000886588	0.00348725	0.00784631	0.000837537	TRUE
LIFE-Heart	3040	C20:3	Number of plaques	0.0081075	0.00969148	0.836559	0.000230306	0.402906	0.68341	0.124802	FALSE
LIFE-Adult	9237	C20:3	Number of plaques	0.0229071	0.00666521	3.43682	0.00127739	0.000591176	0.00177353	0.000837537	TRUE
LIFE-Heart	3099	C20:3	Peripheral artery disease	0.0145583	0.0421763	0.345176	3.84702e-05	0.729985	0.867887	0.124802	FALSE
LIFE-Adult	8723	C20:3	Peripheral artery disease	0.0245533	0.0325672	0.753929	6.51728e-05	0.450912	0.450912	0.000837537	FALSE
LIFE-Heart	5860	C20:3	Main stem stenosis	0.0111578	0.0347534	0.321057	1.75958e-05	0.748178	0.867887	0.124802	FALSE
LIFE-Heart	5749	C20:3	CAD score	0.0264477	0.0196644	1.34495	0.000314655	0.178694	0.370152	0.124802	FALSE
LIFE-Heart	5686	C20:3	Valvular disease	0.0524825	0.0420848	1.24706	0.000273529	0.212426	0.407268	0.124802	FALSE
LIFE-Heart	3040	C20:3	Any plaques	0.0397824	0.0272469	1.46007	0.000701222	0.144374	0.370152	0.124802	FALSE
LIFE-Adult	9237	C20:3	Any plaques	0.0534228	0.0141814	3.7671	0.0015343	0.000166182	0.000747821	0.000837537	TRUE
LIFE-Heart	3031	C3	Ankle brachial index	-0.0207683	0.0134175	-1.54786	0.000790352	0.12176	0.176553	2.61397e-15	FALSE
LIFE-Adult	8677	C3	Ankle brachial index	0.0123149	0.0116315	1.05876	0.000129201	0.28974	0.28974	3.5732e-59	FALSE
LIFE-Adult	8572	C3	Brachial-ankle pulse wave velocity	0.16952	0.0101828	16.6477	0.031326	2.86511e-61	2.5786e-60	3.5732e-59	TRUE
LIFE-Adult	3935	C3	Brachial-femoral pulse wave velocity	0.0681542	0.0151031	4.51259	0.00515092	6.59131e-06	9.88697e-06	3.5732e-59	TRUE
LIFE-Heart	5738	C3	Number of vessel disease (50% stenosis)	0.0706951	0.0117928	5.99476	0.00622619	2.16196e-09	8.95669e-09	2.61397e-15	TRUE
LIFE-Adult	8195	C3	carotid-femoral pulse wave velocity	0.06319	0.0105385	5.99613	0.00436915	2.10641e-09	3.79154e-09	3.5732e-59	TRUE
LIFE-Heart	2961	C3	Carotid intima media thickness	0.0429854	0.0171851	2.50132	0.00210997	0.0124268	0.0211986	2.61397e-15	TRUE
LIFE-Adult	9309	C3	Carotid intima media thickness	0.118027	0.00995903	11.8513	0.0148667	3.60804e-32	1.08241e-31	3.5732e-59	TRUE
LIFE-Heart	4692	C3	Aortic bulb (mm)	0.115877	0.0135867	8.52869	0.0152724	1.97174e-17	5.71805e-16	2.61397e-15	TRUE
LIFE-Heart	1537	C3	Deceleration time (ms)	0.0321951	0.0238375	1.35061	0.00118695	0.17702	0.233345	2.61397e-15	FALSE
LIFE-Heart	961	C3	End-diastolic volume (biplane, ml)	0.0987863	0.0304104	3.24844	0.0108837	0.00120071	0.00217628	2.61397e-15	TRUE
LIFE-Heart	1125	C3	Ejection Fraction (biplane, %)	-0.039761	0.0283489	-1.40256	0.00174866	0.161024	0.222366	2.61397e-15	FALSE
LIFE-Heart	1309	C3	Ejection Fraction (%)	-0.0246677	0.0259478	-0.950666	0.000691004	0.34195	0.381405	2.61397e-15	FALSE
LIFE-Heart	425	C3	E point-septal separation (mm)	-0.00953292	0.0477662	-0.199574	9.41517e-05	0.841909	0.841909	2.61397e-15	FALSE
LIFE-Heart	968	C3	End-systolic volume (biplane, ml)	0.0700011	0.0304105	2.30187	0.00545519	0.0215543	0.0347264	2.61397e-15	TRUE
LIFE-Heart	1111	C3	Flow Propagation Velocity (cm/s)	0.0360854	0.028153	1.28176	0.00147925	0.200194	0.252418	2.61397e-15	FALSE
LIFE-Heart	4162	C3	Fractional shortening (%)	-0.0568098	0.0145826	-3.89574	0.003635	9.94392e-05	0.000240311	2.61397e-15	TRUE
LIFE-Heart	969	C3	Left ventricular mass (g)	0.161809	0.0304072	5.3214	0.0284505	1.27999e-07	4.63997e-07	2.61397e-15	TRUE
LIFE-Heart	2489	C3	Left ventricular function	0.0798322	0.020379	3.91737	0.00613256	9.19328e-05	0.000240311	2.61397e-15	TRUE
LIFE-Heart	5337	C3	Left ventricular internal diameter end diastole	0.0970833	0.0128182	7.57388	0.0106379	4.24425e-14	5.03996e-13	2.61397e-15	TRUE
LIFE-Heart	4173	C3	Left ventricular internal diameter end systole	0.0973368	0.0144684	6.72754	0.0107346	1.9597e-11	9.47187e-11	2.61397e-15	TRUE
LIFE-Heart	4674	C3	Back wall (M-mode, mm)	0.0962603	0.0136715	7.04093	0.0104996	2.18742e-12	1.26871e-11	2.61397e-15	TRUE
LIFE-Heart	1318	C3	Pulmonary venous flow diastolic (cm/s)	0.0479898	0.0257429	1.86419	0.00263379	0.0625169	0.0954206	2.61397e-15	FALSE
LIFE-Heart	1318	C3	Pulmonary venous flow systolic (cm/s)	0.0291214	0.025785	1.1294	0.000968313	0.258937	0.300367	2.61397e-15	FALSE
LIFE-Heart	5442	C3	Septum (mm)	0.0903219	0.0126724	7.12746	0.00925196	1.15561e-12	8.37814e-12	2.61397e-15	TRUE
LIFE-Heart	2391	C3	Tricuspid annular plane systolic excursion (mm)	0.0107158	0.019493	0.549724	0.000126479	0.58256	0.625713	2.61397e-15	FALSE
LIFE-Heart	5844	C3	NT-proBNP (pg/ml)	-0.00441874	0.0113095	-0.390712	2.61301e-05	0.696024	0.720882	2.61397e-15	FALSE
LIFE-Adult	9615	C3	NT-proBNP (pg/ml)	-0.0674722	0.0153382	-4.39897	0.00200895	1.09937e-05	1.41347e-05	3.5732e-59	TRUE
LIFE-Heart	3033	C3	Number of plaques	0.0580176	0.0124414	4.66326	0.00712341	3.24702e-06	9.41635e-06	2.61397e-15	TRUE
LIFE-Adult	9229	C3	Number of plaques	0.11597	0.00941033	12.3237	0.0161932	1.26283e-34	5.68276e-34	3.5732e-59	TRUE
LIFE-Heart	3090	C3	Peripheral artery disease	0.195847	0.054629	3.58505	0.00414485	0.000342233	0.000708912	2.61397e-15	TRUE
LIFE-Adult	8715	C3	Peripheral artery disease	0.18297	0.0460325	3.9748	0.00180999	7.10079e-05	7.98839e-05	3.5732e-59	TRUE
LIFE-Heart	5849	C3	Main stem stenosis	0.16033	0.0470996	3.40407	0.00197789	0.000668372	0.00129219	2.61397e-15	TRUE
LIFE-Heart	5738	C3	CAD score	0.139364	0.0266701	5.22548	0.00473785	1.79842e-07	5.79492e-07	2.61397e-15	TRUE
LIFE-Heart	5675	C3	Valvular disease	0.0707046	0.0569797	1.24087	0.000271347	0.214703	0.259433	2.61397e-15	FALSE
LIFE-Heart	3033	C3	Any plaques	0.133055	0.0350252	3.79882	0.00473859	0.000148239	0.000330687	2.61397e-15	TRUE
LIFE-Adult	9229	C3	Any plaques	0.231822	0.0200368	11.5698	0.0143001	9.546e-31	2.14785e-30	3.5732e-59	TRUE
LIFE-Heart	3031	C3DC	Ankle brachial index	-0.0299078	0.0113071	-2.64506	0.00230446	0.00820994	0.0340126	4.44815e-06	TRUE
LIFE-Adult	8677	C3DC	Ankle brachial index	0.0134947	0.0100931	1.33702	0.000206023	0.181252	0.203908	9.68174e-13	FALSE
LIFE-Adult	8572	C3DC	Brachial-ankle pulse wave velocity	0.0673923	0.00895474	7.52588	0.00656557	5.7669e-14	5.19021e-13	9.68174e-13	TRUE
LIFE-Adult	3935	C3DC	Brachial-femoral pulse wave velocity	0.0420056	0.0129277	3.24927	0.00267722	0.00116673	0.00150008	9.68174e-13	TRUE
LIFE-Heart	5738	C3DC	Number of vessel disease (50% stenosis)	0.0323074	0.0103401	3.12446	0.00169903	0.00179021	0.0103832	4.44815e-06	TRUE
LIFE-Adult	8195	C3DC	carotid-femoral pulse wave velocity	0.0361328	0.00918374	3.93444	0.00188583	8.40803e-05	0.00012612	9.68174e-13	TRUE
LIFE-Heart	2961	C3DC	Carotid intima media thickness	0.0192064	0.0147914	1.29848	0.000569478	0.194224	0.296327	4.44815e-06	FALSE
LIFE-Adult	9309	C3DC	Carotid intima media thickness	0.0499733	0.00869236	5.7491	0.00353876	9.25449e-09	2.08226e-08	9.68174e-13	TRUE
LIFE-Heart	4692	C3DC	Aortic bulb (mm)	0.020562	0.0118379	1.73695	0.000642873	0.0824608	0.173929	4.44815e-06	FALSE
LIFE-Heart	1537	C3DC	Deceleration time (ms)	0.00970316	0.0198385	0.489108	0.000155824	0.624835	0.724809	4.44815e-06	FALSE
LIFE-Heart	961	C3DC	End-diastolic volume (biplane, ml)	-0.00499215	0.0274536	-0.18184	3.44781e-05	0.855747	0.881912	4.44815e-06	FALSE
LIFE-Heart	1125	C3DC	Ejection Fraction (biplane, %)	-0.0181502	0.0253883	-0.714903	0.000454901	0.474817	0.598683	4.44815e-06	FALSE
LIFE-Heart	1309	C3DC	Ejection Fraction (%)	-0.014688	0.0233765	-0.628325	0.000301968	0.529901	0.640297	4.44815e-06	FALSE
LIFE-Heart	425	C3DC	E point-septal separation (mm)	0.0580531	0.0435739	1.33229	0.00417868	0.183482	0.296327	4.44815e-06	FALSE
LIFE-Heart	968	C3DC	End-systolic volume (biplane, ml)	-0.00457336	0.0274126	-0.166834	2.88124e-05	0.867535	0.881912	4.44815e-06	FALSE
LIFE-Heart	1111	C3DC	Flow Propagation Velocity (cm/s)	0.00345831	0.0232756	0.14858	1.9906e-05	0.881912	0.881912	4.44815e-06	FALSE
LIFE-Heart	4162	C3DC	Fractional shortening (%)	-0.0217391	0.0125791	-1.72819	0.000717429	0.0840281	0.173929	4.44815e-06	FALSE
LIFE-Heart	969	C3DC	Left ventricular mass (g)	0.00712174	0.0272319	0.261522	7.07227e-05	0.793746	0.881912	4.44815e-06	FALSE
LIFE-Heart	2489	C3DC	Left ventricular function	0.038952	0.0184557	2.11057	0.00178791	0.0349088	0.0914581	4.44815e-06	FALSE
LIFE-Heart	5337	C3DC	Left ventricular internal diameter end diastole	0.0136258	0.0112031	1.21626	0.000277202	0.223941	0.309251	4.44815e-06	FALSE
LIFE-Heart	4173	C3DC	Left ventricular internal diameter end systole	0.0166273	0.0125983	1.3198	0.000417442	0.186973	0.296327	4.44815e-06	FALSE
LIFE-Heart	4674	C3DC	Back wall (M-mode, mm)	0.040506	0.0118907	3.40653	0.00247768	0.00066349	0.0048103	4.44815e-06	TRUE
LIFE-Heart	1318	C3DC	Pulmonary venous flow diastolic (cm/s)	0.0313698	0.0215106	1.45834	0.00161347	0.144986	0.262787	4.44815e-06	FALSE
LIFE-Heart	1318	C3DC	Pulmonary venous flow systolic (cm/s)	-0.0170155	0.0215262	-0.790452	0.000474558	0.429406	0.566035	4.44815e-06	FALSE
LIFE-Heart	5442	C3DC	Septum (mm)	0.0275929	0.0110983	2.48624	0.00113499	0.0129399	0.0469072	4.44815e-06	FALSE
LIFE-Heart	2391	C3DC	Tricuspid annular plane systolic excursion (mm)	-0.0358201	0.0172404	-2.07769	0.00180368	0.0378447	0.0914581	4.44815e-06	FALSE
LIFE-Heart	5844	C3DC	NT-proBNP (pg/ml)	0.0527536	0.00986548	5.34729	0.00487064	9.26698e-08	2.68742e-06	4.44815e-06	TRUE
LIFE-Adult	9615	C3DC	NT-proBNP (pg/ml)	0.0868024	0.0132839	6.53443	0.00442213	6.70907e-11	3.01908e-10	9.68174e-13	TRUE
LIFE-Heart	3033	C3DC	Number of plaques	0.0395238	0.0106401	3.71461	0.00453176	0.00020719	0.00300426	4.44815e-06	TRUE
LIFE-Adult	9229	C3DC	Number of plaques	0.0496049	0.00820674	6.04441	0.00394395	1.55767e-09	4.67301e-09	9.68174e-13	TRUE
LIFE-Heart	3090	C3DC	Peripheral artery disease	0.125627	0.0462459	2.71651	0.00238401	0.00663426	0.0320656	4.44815e-06	TRUE
LIFE-Adult	8715	C3DC	Peripheral artery disease	-0.0362688	0.0399152	-0.908647	9.47505e-05	0.363562	0.363562	9.68174e-13	FALSE
LIFE-Heart	5849	C3DC	Main stem stenosis	0.0938982	0.0412256	2.27767	0.000886467	0.0227823	0.0734098	4.44815e-06	FALSE
LIFE-Heart	5738	C3DC	CAD score	0.0396519	0.0233814	1.69588	0.000501144	0.0899633	0.173929	4.44815e-06	FALSE
LIFE-Heart	5675	C3DC	Valvular disease	0.0633922	0.0499402	1.26936	0.000283946	0.204364	0.296327	4.44815e-06	FALSE
LIFE-Heart	3033	C3DC	Any plaques	0.0666248	0.0299618	2.22366	0.0016287	0.026245	0.0761104	4.44815e-06	FALSE
LIFE-Adult	9229	C3DC	Any plaques	0.0885846	0.0174675	5.07141	0.00277964	4.02557e-07	7.24603e-07	9.68174e-13	TRUE
LIFE-Heart	3039	C4	Ankle brachial index	-0.0197201	0.013503	-1.46042	0.00070179	0.144278	0.181915	5.14326e-09	FALSE
LIFE-Adult	8685	C4	Ankle brachial index	-0.00517171	0.0113388	-0.456109	2.39583e-05	0.648323	0.648323	1.39454e-36	FALSE
LIFE-Adult	8580	C4	Brachial-ankle pulse wave velocity	0.129748	0.00998201	12.9982	0.0193156	2.87533e-38	2.5878e-37	1.39454e-36	TRUE
LIFE-Adult	3935	C4	Brachial-femoral pulse wave velocity	0.0404125	0.0147711	2.73593	0.00189959	0.00624843	0.00702948	1.39454e-36	TRUE
LIFE-Heart	5747	C4	Number of vessel disease (50% stenosis)	0.0444761	0.0119526	3.72105	0.00240433	0.000200294	0.000484044	5.14326e-09	TRUE
LIFE-Adult	8200	C4	carotid-femoral pulse wave velocity	0.0439814	0.010297	4.27129	0.00222047	1.96538e-05	2.94807e-05	1.39454e-36	TRUE
LIFE-Heart	2970	C4	Carotid intima media thickness	0.00774438	0.0175012	0.442505	6.59695e-05	0.658156	0.681662	5.14326e-09	FALSE
LIFE-Adult	9317	C4	Carotid intima media thickness	0.0818801	0.00975862	8.39054	0.00750114	5.54452e-17	1.24752e-16	1.39454e-36	TRUE
LIFE-Heart	4699	C4	Aortic bulb (mm)	0.0680848	0.0138268	4.92411	0.00513568	8.76528e-07	4.23655e-06	5.14326e-09	TRUE
LIFE-Heart	1537	C4	Deceleration time (ms)	0.0933121	0.0239911	3.88945	0.00975908	0.000104764	0.000276195	5.14326e-09	TRUE
LIFE-Heart	971	C4	End-diastolic volume (biplane, ml)	0.0314382	0.0308918	1.01769	0.00106768	0.30908	0.344744	5.14326e-09	FALSE
LIFE-Heart	1134	C4	Ejection Fraction (biplane, %)	-0.087823	0.0283463	-3.09822	0.00840834	0.00199485	0.00385672	5.14326e-09	TRUE
LIFE-Heart	1317	C4	Ejection Fraction (%)	-0.0459688	0.0265067	-1.73423	0.0022819	0.0831115	0.109556	5.14326e-09	FALSE
LIFE-Heart	431	C4	E point-septal separation (mm)	0.0881029	0.0464486	1.89678	0.00831669	0.0585281	0.0808245	5.14326e-09	FALSE
LIFE-Heart	977	C4	End-systolic volume (biplane, ml)	0.0399239	0.0309073	1.29173	0.00170842	0.196757	0.237748	5.14326e-09	FALSE
LIFE-Heart	1111	C4	Flow Propagation Velocity (cm/s)	-0.0308366	0.028484	-1.08259	0.0010557	0.279225	0.323901	5.14326e-09	FALSE
LIFE-Heart	4169	C4	Fractional shortening (%)	-0.0742773	0.0146405	-5.07343	0.0061391	4.07727e-07	2.95602e-06	5.14326e-09	TRUE
LIFE-Heart	977	C4	Left ventricular mass (g)	0.122307	0.0305887	3.99845	0.016133	6.85733e-05	0.000198863	5.14326e-09	TRUE
LIFE-Heart	2489	C4	Left ventricular function	0.0702586	0.0207917	3.37917	0.00457041	0.000738258	0.00152925	5.14326e-09	TRUE
LIFE-Heart	5345	C4	Left ventricular internal diameter end diastole	0.0557493	0.0130006	4.2882	0.00342984	1.833e-05	5.90632e-05	5.14326e-09	TRUE
LIFE-Heart	4180	C4	Left ventricular internal diameter end systole	0.0878611	0.0145915	6.02138	0.00860341	1.87808e-09	2.72322e-08	5.14326e-09	TRUE
LIFE-Heart	4681	C4	Back wall (M-mode, mm)	0.0635808	0.0138662	4.58531	0.00447339	4.65144e-06	1.92702e-05	5.14326e-09	TRUE
LIFE-Heart	1318	C4	Pulmonary venous flow diastolic (cm/s)	-0.00571963	0.0257112	-0.222457	3.76028e-05	0.823993	0.823993	5.14326e-09	FALSE
LIFE-Heart	1318	C4	Pulmonary venous flow systolic (cm/s)	-0.0188144	0.0256718	-0.732882	0.000407977	0.463761	0.498113	5.14326e-09	FALSE
LIFE-Heart	5450	C4	Septum (mm)	0.0838336	0.0128616	6.51815	0.00773816	7.75923e-11	2.25018e-09	5.14326e-09	TRUE
LIFE-Heart	2397	C4	Tricuspid annular plane systolic excursion (mm)	-0.056378	0.0193693	-2.91069	0.00352495	0.0036396	0.00659678	5.14326e-09	TRUE
LIFE-Heart	5853	C4	NT-proBNP (pg/ml)	0.0677662	0.011413	5.93764	0.00598946	3.05775e-09	2.95582e-08	5.14326e-09	TRUE
LIFE-Adult	9623	C4	NT-proBNP (pg/ml)	0.0650071	0.0149992	4.33405	0.00194859	1.4788e-05	2.66183e-05	1.39454e-36	TRUE
LIFE-Heart	3040	C4	Number of plaques	0.0621623	0.0125824	4.94043	0.00797014	8.21698e-07	4.23655e-06	5.14326e-09	TRUE
LIFE-Adult	9237	C4	Number of plaques	0.0940315	0.00920256	10.218	0.0111792	2.22069e-24	9.99309e-24	1.39454e-36	TRUE
LIFE-Heart	3099	C4	Peripheral artery disease	0.118174	0.0551026	2.14462	0.00148292	0.0320605	0.051653	5.14326e-09	FALSE
LIFE-Adult	8723	C4	Peripheral artery disease	0.150478	0.0448832	3.35265	0.00128721	0.000803828	0.00103349	1.39454e-36	TRUE
LIFE-Heart	5858	C4	Main stem stenosis	0.0935052	0.0477148	1.95967	0.000655358	0.0500822	0.0726191	5.14326e-09	FALSE
LIFE-Heart	5747	C4	CAD score	0.0561078	0.0270365	2.07526	0.000749084	0.0380067	0.0580102	5.14326e-09	FALSE
LIFE-Heart	5684	C4	Valvular disease	0.160848	0.0577719	2.7842	0.00136241	0.00538376	0.00918406	5.14326e-09	TRUE
LIFE-Heart	3040	C4	Any plaques	0.160994	0.0354044	4.5473	0.00676041	5.64639e-06	2.04682e-05	5.14326e-09	TRUE
LIFE-Adult	9237	C4	Any plaques	0.181181	0.0196025	9.24276	0.00916574	2.93675e-20	8.81024e-20	1.39454e-36	TRUE
LIFE-Heart	3039	C4OH	Ankle brachial index	-0.0685229	0.0124183	-5.51788	0.00992586	3.71951e-08	9.80599e-08	9.93194e-29	TRUE
LIFE-Adult	8684	C4OH	Ankle brachial index	-0.0180013	0.0102794	-1.75121	0.000353104	0.0799454	0.0799454	2.78992e-36	FALSE
LIFE-Adult	8579	C4OH	Brachial-ankle pulse wave velocity	0.117166	0.00905471	12.9398	0.0191479	6.07198e-38	5.46478e-37	2.78992e-36	TRUE
LIFE-Adult	3935	C4OH	Brachial-femoral pulse wave velocity	0.0307108	0.0133688	2.2972	0.00133996	0.0216596	0.024367	2.78992e-36	TRUE
LIFE-Heart	5748	C4OH	Number of vessel disease (50% stenosis)	0.073259	0.0110749	6.61485	0.00755752	4.05598e-11	1.79154e-10	9.93194e-29	TRUE
LIFE-Adult	8199	C4OH	carotid-femoral pulse wave velocity	0.0376752	0.00933178	4.0373	0.00198456	5.45613e-05	8.18419e-05	2.78992e-36	TRUE
LIFE-Heart	2970	C4OH	Carotid intima media thickness	0.0357823	0.0161287	2.21855	0.00165559	0.026593	0.0321333	9.93194e-29	TRUE
LIFE-Adult	9316	C4OH	Carotid intima media thickness	0.0731989	0.00881853	8.30058	0.00734311	1.18038e-16	2.65585e-16	2.78992e-36	TRUE
LIFE-Heart	4700	C4OH	Aortic bulb (mm)	0.0492455	0.0127686	3.85678	0.00315619	0.00011643	0.000187582	9.93194e-29	TRUE
LIFE-Heart	1537	C4OH	Deceleration time (ms)	1.87073e-05	0.0218971	0.000854327	4.75488e-10	0.999318	0.999318	9.93194e-29	FALSE
LIFE-Heart	971	C4OH	End-diastolic volume (biplane, ml)	0.0568391	0.0288263	1.97178	0.00399627	0.0489187	0.0567457	9.93194e-29	FALSE
LIFE-Heart	1134	C4OH	Ejection Fraction (biplane, %)	-0.0859103	0.0264905	-3.24307	0.00920553	0.00121704	0.00176471	9.93194e-29	TRUE
LIFE-Heart	1317	C4OH	Ejection Fraction (%)	-0.0660255	0.0245387	-2.69067	0.00547533	0.00722124	0.00951891	9.93194e-29	TRUE
LIFE-Heart	431	C4OH	E point-septal separation (mm)	0.0174545	0.0428568	0.407275	0.000386502	0.684009	0.734676	9.93194e-29	FALSE
LIFE-Heart	977	C4OH	End-systolic volume (biplane, ml)	0.0801824	0.0287186	2.792	0.00793174	0.00534069	0.00737524	9.93194e-29	TRUE
LIFE-Heart	1111	C4OH	Flow Propagation Velocity (cm/s)	-0.00255472	0.0257296	-0.0992908	8.88961e-06	0.920925	0.953816	9.93194e-29	FALSE
LIFE-Heart	4170	C4OH	Fractional shortening (%)	-0.108781	0.0135851	-8.00739	0.0151504	1.50701e-15	1.45678e-14	9.93194e-29	TRUE
LIFE-Heart	977	C4OH	Left ventricular mass (g)	0.0933883	0.0285541	3.27057	0.0108518	0.00111092	0.00169561	9.93194e-29	TRUE
LIFE-Heart	2490	C4OH	Left ventricular function	0.0795434	0.0193546	4.10979	0.00674294	4.08844e-05	7.41031e-05	9.93194e-29	TRUE
LIFE-Heart	5346	C4OH	Left ventricular internal diameter end diastole	0.0805351	0.0120261	6.69671	0.00832199	2.35042e-11	1.36324e-10	9.93194e-29	TRUE
LIFE-Heart	4181	C4OH	Left ventricular internal diameter end systole	0.117879	0.0135063	8.72771	0.0179012	3.69515e-18	5.35797e-17	9.93194e-29	TRUE
LIFE-Heart	4682	C4OH	Back wall (M-mode, mm)	0.0666823	0.0128654	5.18308	0.00570748	2.27438e-07	5.49641e-07	9.93194e-29	TRUE
LIFE-Heart	1318	C4OH	Pulmonary venous flow diastolic (cm/s)	0.060613	0.0234953	2.57979	0.00503178	0.00999368	0.0126007	9.93194e-29	TRUE
LIFE-Heart	1318	C4OH	Pulmonary venous flow systolic (cm/s)	-0.0357378	0.0234689	-1.52278	0.00175894	0.128055	0.142831	9.93194e-29	FALSE
LIFE-Heart	5451	C4OH	Septum (mm)	0.0750929	0.0119094	6.30537	0.00724348	3.10137e-10	9.99331e-10	9.93194e-29	TRUE
LIFE-Heart	2398	C4OH	Tricuspid annular plane systolic excursion (mm)	-0.091913	0.0181968	-5.05106	0.0105361	4.72465e-07	9.78677e-07	9.93194e-29	TRUE
LIFE-Heart	5854	C4OH	NT-proBNP (pg/ml)	0.122864	0.0105017	11.6994	0.0228552	2.854e-31	8.27661e-30	9.93194e-29	TRUE
LIFE-Adult	9622	C4OH	NT-proBNP (pg/ml)	0.0878881	0.0135694	6.47695	0.00434186	9.81752e-11	1.76715e-10	2.78992e-36	TRUE
LIFE-Heart	3040	C4OH	Number of plaques	0.0883396	0.0115935	7.61975	0.0187531	3.37409e-14	2.44622e-13	9.93194e-29	TRUE
LIFE-Adult	9236	C4OH	Number of plaques	0.106035	0.00828337	12.8009	0.0174362	3.35372e-37	1.50917e-36	2.78992e-36	TRUE
LIFE-Heart	3099	C4OH	Peripheral artery disease	0.335196	0.0506819	6.61373	0.0139271	4.39762e-11	1.79154e-10	9.93194e-29	TRUE
LIFE-Adult	8722	C4OH	Peripheral artery disease	0.109904	0.040692	2.70087	0.00083585	0.00692916	0.00890892	2.78992e-36	TRUE
LIFE-Heart	5859	C4OH	Main stem stenosis	0.200687	0.0442282	4.53754	0.00350301	5.8052e-06	1.12234e-05	9.93194e-29	TRUE
LIFE-Heart	5748	C4OH	CAD score	0.0968247	0.0250924	3.85873	0.00258463	0.000115227	0.000187582	9.93194e-29	TRUE
LIFE-Heart	5685	C4OH	Valvular disease	0.352392	0.0535106	6.58547	0.00757345	4.94218e-11	1.79154e-10	9.93194e-29	TRUE
LIFE-Heart	3040	C4OH	Any plaques	0.190049	0.0327309	5.80642	0.0109758	7.04172e-09	2.0421e-08	9.93194e-29	TRUE
LIFE-Adult	9236	C4OH	Any plaques	0.186898	0.0176756	10.5738	0.0119631	5.54771e-26	1.66431e-25	2.78992e-36	TRUE
LIFE-Heart	3039	C5	Ankle brachial index	-0.0227335	0.0130989	-1.73553	0.000990808	0.0827481	0.1263	2.69518e-11	FALSE
LIFE-Adult	8685	C5	Ankle brachial index	-0.0151726	0.011189	-1.35602	0.000211726	0.175127	0.197017	5.39978e-29	FALSE
LIFE-Adult	8580	C5	Brachial-ankle pulse wave velocity	0.113893	0.00988827	11.5179	0.01523	1.79374e-30	1.61437e-29	5.39978e-29	TRUE
LIFE-Adult	3935	C5	Brachial-femoral pulse wave velocity	0.0374115	0.0145467	2.57183	0.00167892	0.0101527	0.0130535	5.39978e-29	TRUE
LIFE-Heart	5749	C5	Number of vessel disease (50% stenosis)	0.0426542	0.0116495	3.66145	0.0023273	0.000253045	0.000733831	2.69518e-11	TRUE
LIFE-Adult	8200	C5	carotid-femoral pulse wave velocity	0.0298904	0.0102063	2.92864	0.00104513	0.00341386	0.0051208	5.39978e-29	TRUE
LIFE-Heart	2970	C5	Carotid intima media thickness	0.0444777	0.0169243	2.62804	0.00232162	0.00863205	0.0178807	2.69518e-11	TRUE
LIFE-Adult	9317	C5	Carotid intima media thickness	0.0724195	0.00963064	7.5197	0.00603379	5.99801e-14	1.34955e-13	5.39978e-29	TRUE
LIFE-Heart	4701	C5	Aortic bulb (mm)	0.0862184	0.0134125	6.42824	0.00871717	1.41909e-10	1.37179e-09	2.69518e-11	TRUE
LIFE-Heart	1537	C5	Deceleration time (ms)	0.0160016	0.0232665	0.687753	0.000308051	0.491712	0.59995	2.69518e-11	FALSE
LIFE-Heart	971	C5	End-diastolic volume (biplane, ml)	0.0186251	0.0298315	0.624342	0.000402111	0.53255	0.59995	2.69518e-11	FALSE
LIFE-Heart	1134	C5	Ejection Fraction (biplane, %)	-0.0633267	0.0276469	-2.29055	0.00461345	0.0221725	0.0378236	2.69518e-11	TRUE
LIFE-Heart	1317	C5	Ejection Fraction (%)	-0.0166872	0.0255786	-0.652389	0.000323554	0.514265	0.59995	2.69518e-11	FALSE
LIFE-Heart	431	C5	E point-septal separation (mm)	0.0453808	0.0444818	1.02021	0.00242031	0.308203	0.406268	2.69518e-11	FALSE
LIFE-Heart	977	C5	End-systolic volume (biplane, ml)	0.0184648	0.0299641	0.61623	0.000389325	0.537886	0.59995	2.69518e-11	FALSE
LIFE-Heart	1111	C5	Flow Propagation Velocity (cm/s)	-0.0156427	0.0275602	-0.567583	0.000290403	0.570433	0.612687	2.69518e-11	FALSE
LIFE-Heart	4171	C5	Fractional shortening (%)	-0.0485918	0.0142501	-3.40991	0.00278128	0.000656005	0.00172947	2.69518e-11	TRUE
LIFE-Heart	977	C5	Left ventricular mass (g)	0.140323	0.0294706	4.76147	0.0227245	2.21315e-06	8.02267e-06	2.69518e-11	TRUE
LIFE-Heart	2491	C5	Left ventricular function	0.0412254	0.0203246	2.02835	0.00165022	0.042631	0.0686833	2.69518e-11	FALSE
LIFE-Heart	5347	C5	Left ventricular internal diameter end diastole	0.0725931	0.0126484	5.73932	0.00612497	1.00292e-08	7.27116e-08	2.69518e-11	TRUE
LIFE-Heart	4182	C5	Left ventricular internal diameter end systole	0.0792635	0.0141695	5.59396	0.00743058	2.36139e-08	1.36961e-07	2.69518e-11	TRUE
LIFE-Heart	4683	C5	Back wall (M-mode, mm)	0.09855	0.0134793	7.3112	0.0112904	3.09791e-13	8.98394e-12	2.69518e-11	TRUE
LIFE-Heart	1318	C5	Pulmonary venous flow diastolic (cm/s)	0.0116248	0.0250905	0.463317	0.000163091	0.643214	0.666186	2.69518e-11	FALSE
LIFE-Heart	1318	C5	Pulmonary venous flow systolic (cm/s)	-0.000636928	0.025165	-0.0253101	4.8678e-07	0.979811	0.979811	2.69518e-11	FALSE
LIFE-Heart	5452	C5	Septum (mm)	0.089164	0.0125069	7.12919	0.00923958	1.14104e-12	1.65451e-11	2.69518e-11	TRUE
LIFE-Heart	2399	C5	Tricuspid annular plane systolic excursion (mm)	-0.0610899	0.0190063	-3.2142	0.0042915	0.00132547	0.00320322	2.69518e-11	TRUE
LIFE-Heart	5855	C5	NT-proBNP (pg/ml)	0.028333	0.0111467	2.54183	0.00110265	0.0110528	0.02116	2.69518e-11	TRUE
LIFE-Adult	9623	C5	NT-proBNP (pg/ml)	-0.00575404	0.0147683	-0.38962	1.57782e-05	0.696826	0.696826	5.39978e-29	FALSE
LIFE-Heart	3040	C5	Number of plaques	0.0664454	0.0122619	5.41883	0.00957296	6.46772e-08	3.12606e-07	2.69518e-11	TRUE
LIFE-Adult	9237	C5	Number of plaques	0.0905918	0.00907579	9.9817	0.0106736	2.4064e-23	1.08288e-22	5.39978e-29	TRUE
LIFE-Heart	3099	C5	Peripheral artery disease	0.13491	0.0534652	2.52333	0.00205171	0.0116745	0.02116	2.69518e-11	TRUE
LIFE-Adult	8723	C5	Peripheral artery disease	0.186856	0.0442793	4.21995	0.0020378	2.46833e-05	4.44299e-05	5.39978e-29	TRUE
LIFE-Heart	5860	C5	Main stem stenosis	0.0676174	0.0465044	1.454	0.000360763	0.146	0.201619	2.69518e-11	FALSE
LIFE-Heart	5749	C5	CAD score	0.0787496	0.0263378	2.98999	0.00155318	0.00280171	0.00624997	2.69518e-11	TRUE
LIFE-Heart	5686	C5	Valvular disease	0.0828183	0.0562653	1.47192	0.000381023	0.141097	0.201619	2.69518e-11	FALSE
LIFE-Heart	3040	C5	Any plaques	0.155153	0.0345334	4.49284	0.00660051	7.29029e-06	2.34909e-05	2.69518e-11	TRUE
LIFE-Adult	9237	C5	Any plaques	0.165002	0.0193407	8.53136	0.0078197	1.67471e-17	5.02412e-17	5.39978e-29	TRUE
LIFE-Heart	3039	C5:1	Ankle brachial index	-0.00417207	0.0102164	-0.408371	5.49086e-05	0.68303	0.900358	0.0284636	FALSE
LIFE-Adult	8685	C5:1	Ankle brachial index	0.00115991	0.00889732	0.130366	1.9573e-06	0.89628	0.985587	0.0033054	FALSE
LIFE-Adult	8580	C5:1	Brachial-ankle pulse wave velocity	0.0283905	0.00790937	3.58948	0.00149977	0.00033319	0.00299871	0.0033054	TRUE
LIFE-Adult	3935	C5:1	Brachial-femoral pulse wave velocity	-0.000411058	0.0116334	-0.0353342	3.17444e-07	0.971815	0.985587	0.0033054	FALSE
LIFE-Heart	5749	C5:1	Number of vessel disease (50% stenosis)	0.0266341	0.00913837	2.91454	0.0014759	0.00357587	0.0345667	0.0284636	TRUE
LIFE-Adult	8200	C5:1	carotid-femoral pulse wave velocity	0.000746688	0.0081047	0.0921303	1.03537e-06	0.926597	0.985587	0.0033054	FALSE
LIFE-Heart	2970	C5:1	Carotid intima media thickness	0.0152277	0.0131699	1.15625	0.000450243	0.24767	0.513031	0.0284636	FALSE
LIFE-Adult	9317	C5:1	Carotid intima media thickness	0.017383	0.00766665	2.26735	0.000551587	0.0233918	0.0701753	0.0033054	FALSE
LIFE-Heart	4701	C5:1	Aortic bulb (mm)	0.0190364	0.010597	1.79639	0.000686277	0.0724962	0.233599	0.0284636	FALSE
LIFE-Heart	1537	C5:1	Deceleration time (ms)	0.0621655	0.0185955	3.34304	0.00722811	0.000848592	0.0246092	0.0284636	TRUE
LIFE-Heart	971	C5:1	End-diastolic volume (biplane, ml)	-0.00442519	0.0227735	-0.194313	3.89639e-05	0.845972	0.927156	0.0284636	FALSE
LIFE-Heart	1134	C5:1	Ejection Fraction (biplane, %)	-0.0088187	0.0214739	-0.410671	0.000148962	0.681392	0.900358	0.0284636	FALSE
LIFE-Heart	1317	C5:1	Ejection Fraction (%)	0.00419579	0.0193732	0.216577	3.56683e-05	0.828572	0.927156	0.0284636	FALSE
LIFE-Heart	431	C5:1	E point-septal separation (mm)	0.0715231	0.0326082	2.19341	0.0110902	0.0288141	0.139268	0.0284636	FALSE
LIFE-Heart	977	C5:1	End-systolic volume (biplane, ml)	-0.00491814	0.0229175	-0.214602	4.72325e-05	0.830123	0.927156	0.0284636	FALSE
LIFE-Heart	1111	C5:1	Flow Propagation Velocity (cm/s)	-0.0309221	0.02198	-1.40683	0.00178146	0.159759	0.421183	0.0284636	FALSE
LIFE-Heart	4171	C5:1	Fractional shortening (%)	-0.0347179	0.0112024	-3.09916	0.00229856	0.00195367	0.0283282	0.0284636	TRUE
LIFE-Heart	977	C5:1	Left ventricular mass (g)	0.00447074	0.0227526	0.196494	3.95981e-05	0.844265	0.927156	0.0284636	FALSE
LIFE-Heart	2491	C5:1	Left ventricular function	0.0170582	0.0159377	1.0703	0.000460032	0.284587	0.525973	0.0284636	FALSE
LIFE-Heart	5347	C5:1	Left ventricular internal diameter end diastole	0.0105026	0.00992863	1.0578	0.000209302	0.290192	0.525973	0.0284636	FALSE
LIFE-Heart	4182	C5:1	Left ventricular internal diameter end systole	0.0247213	0.0112328	2.20083	0.00115742	0.0278027	0.139268	0.0284636	FALSE
LIFE-Heart	4683	C5:1	Back wall (M-mode, mm)	0.0132112	0.0105724	1.2496	0.000333471	0.211508	0.473924	0.0284636	FALSE
LIFE-Heart	1318	C5:1	Pulmonary venous flow diastolic (cm/s)	0.00152381	0.0202965	0.0750776	4.28314e-06	0.940164	0.957366	0.0284636	FALSE
LIFE-Heart	1318	C5:1	Pulmonary venous flow systolic (cm/s)	0.00845774	0.0203064	0.416505	0.000131804	0.677108	0.900358	0.0284636	FALSE
LIFE-Heart	5452	C5:1	Septum (mm)	0.00817362	0.00982894	0.831587	0.000126871	0.405679	0.619194	0.0284636	FALSE
LIFE-Heart	2399	C5:1	Tricuspid annular plane systolic excursion (mm)	-0.0135906	0.0147098	-0.923912	0.000355991	0.355625	0.572952	0.0284636	FALSE
LIFE-Heart	5855	C5:1	NT-proBNP (pg/ml)	0.0151101	0.00874094	1.72865	0.000510289	0.0839237	0.243379	0.0284636	FALSE
LIFE-Adult	9623	C5:1	NT-proBNP (pg/ml)	-0.000211807	0.0117243	-0.0180657	3.39224e-08	0.985587	0.985587	0.0033054	FALSE
LIFE-Heart	3040	C5:1	Number of plaques	0.0220373	0.00956972	2.30282	0.0017425	0.0213564	0.139268	0.0284636	FALSE
LIFE-Adult	9237	C5:1	Number of plaques	0.0178628	0.00723585	2.46865	0.000659471	0.0135804	0.0611116	0.0033054	FALSE
LIFE-Heart	3099	C5:1	Peripheral artery disease	0.00717998	0.0416717	0.172299	9.58557e-06	0.863214	0.927156	0.0284636	FALSE
LIFE-Adult	8723	C5:1	Peripheral artery disease	0.0073641	0.035252	0.208899	5.00383e-06	0.834532	0.985587	0.0033054	FALSE
LIFE-Heart	5860	C5:1	Main stem stenosis	0.00194886	0.0364536	0.0534613	4.87899e-07	0.957366	0.957366	0.0284636	FALSE
LIFE-Heart	5749	C5:1	CAD score	0.0404406	0.0206608	1.95736	0.000666211	0.0503532	0.182531	0.0284636	FALSE
LIFE-Heart	5686	C5:1	Valvular disease	0.0549416	0.044059	1.247	0.000273502	0.212449	0.473924	0.0284636	FALSE
LIFE-Heart	3040	C5:1	Any plaques	0.0257878	0.0269303	0.957574	0.000301735	0.338354	0.572952	0.0284636	FALSE
LIFE-Adult	9237	C5:1	Any plaques	0.0236242	0.0154006	1.53397	0.000254734	0.125071	0.28141	0.0033054	FALSE
LIFE-Heart	3039	C5OH+HMG	Ankle brachial index	-0.0133191	0.0133893	-0.994753	0.00032572	0.319936	0.441816	2.88198e-13	FALSE
LIFE-Adult	8683	C5OH+HMG	Ankle brachial index	0.0146784	0.0112228	1.30791	0.000197015	0.19094	0.202963	1.88417e-21	FALSE
LIFE-Adult	8578	C5OH+HMG	Brachial-ankle pulse wave velocity	0.0977655	0.00990697	9.86836	0.011228	7.55393e-23	6.79854e-22	1.88417e-21	TRUE
LIFE-Adult	3934	C5OH+HMG	Brachial-femoral pulse wave velocity	-0.0185848	0.014595	-1.27337	0.000412206	0.202963	0.202963	1.88417e-21	FALSE
LIFE-Heart	5748	C5OH+HMG	Number of vessel disease (50% stenosis)	0.0530616	0.0118603	4.47387	0.00347129	7.82982e-06	3.24378e-05	2.88198e-13	TRUE
LIFE-Adult	8198	C5OH+HMG	carotid-femoral pulse wave velocity	0.0266865	0.0101895	2.61902	0.000836204	0.00883452	0.0113587	1.88417e-21	TRUE
LIFE-Heart	2970	C5OH+HMG	Carotid intima media thickness	0.0368586	0.0173517	2.1242	0.00151799	0.0337358	0.0652225	2.88198e-13	FALSE
LIFE-Adult	9315	C5OH+HMG	Carotid intima media thickness	0.0694932	0.00964561	7.20464	0.0055427	6.27188e-13	1.41117e-12	1.88417e-21	TRUE
LIFE-Heart	4701	C5OH+HMG	Aortic bulb (mm)	0.107875	0.0136173	7.92188	0.0131792	2.89854e-15	8.40578e-14	2.88198e-13	TRUE
LIFE-Heart	1537	C5OH+HMG	Deceleration time (ms)	0.0152912	0.0239585	0.638237	0.000265302	0.523414	0.61413	2.88198e-13	FALSE
LIFE-Heart	971	C5OH+HMG	End-diastolic volume (biplane, ml)	0.0867171	0.030663	2.82807	0.0081863	0.00477944	0.0106618	2.88198e-13	TRUE
LIFE-Heart	1134	C5OH+HMG	Ejection Fraction (biplane, %)	-0.0392401	0.028425	-1.38048	0.00168067	0.167712	0.243182	2.88198e-13	FALSE
LIFE-Heart	1317	C5OH+HMG	Ejection Fraction (%)	-0.0239419	0.0264095	-0.906564	0.000624597	0.364804	0.480878	2.88198e-13	FALSE
LIFE-Heart	431	C5OH+HMG	E point-septal separation (mm)	-0.0374136	0.0457892	-0.817083	0.00155382	0.414335	0.522422	2.88198e-13	FALSE
LIFE-Heart	977	C5OH+HMG	End-systolic volume (biplane, ml)	0.0666333	0.0306318	2.1753	0.00482983	0.0298472	0.0618264	2.88198e-13	FALSE
LIFE-Heart	1111	C5OH+HMG	Flow Propagation Velocity (cm/s)	-0.0109309	0.0280773	-0.389315	0.00013665	0.697118	0.751056	2.88198e-13	FALSE
LIFE-Heart	4171	C5OH+HMG	Fractional shortening (%)	-0.0569065	0.0144613	-3.93507	0.00370053	8.4526e-05	0.000245125	2.88198e-13	TRUE
LIFE-Heart	977	C5OH+HMG	Left ventricular mass (g)	0.130668	0.0303266	4.30871	0.0186852	1.80853e-05	6.5559e-05	2.88198e-13	TRUE
LIFE-Heart	2490	C5OH+HMG	Left ventricular function	0.0326645	0.0206177	1.58429	0.00100782	0.113254	0.172862	2.88198e-13	FALSE
LIFE-Heart	5346	C5OH+HMG	Left ventricular internal diameter end diastole	0.0755152	0.0128297	5.88599	0.00644119	4.19773e-09	4.05781e-08	2.88198e-13	TRUE
LIFE-Heart	4182	C5OH+HMG	Left ventricular internal diameter end systole	0.0883907	0.0144393	6.12154	0.00888523	1.01192e-09	1.46729e-08	2.88198e-13	TRUE
LIFE-Heart	4683	C5OH+HMG	Back wall (M-mode, mm)	0.0622855	0.0137236	4.53856	0.00438117	5.80596e-06	2.80621e-05	2.88198e-13	TRUE
LIFE-Heart	1318	C5OH+HMG	Pulmonary venous flow diastolic (cm/s)	-0.000958394	0.0258981	-0.0370063	1.04063e-06	0.970486	0.970486	2.88198e-13	FALSE
LIFE-Heart	1318	C5OH+HMG	Pulmonary venous flow systolic (cm/s)	0.0163106	0.0259287	0.629054	0.0003006	0.529423	0.61413	2.88198e-13	FALSE
LIFE-Heart	5451	C5OH+HMG	Septum (mm)	0.071333	0.0127397	5.59925	0.00572074	2.25805e-08	1.63709e-07	2.88198e-13	TRUE
LIFE-Heart	2398	C5OH+HMG	Tricuspid annular plane systolic excursion (mm)	0.00124719	0.0191924	0.0649837	1.76247e-06	0.948192	0.970486	2.88198e-13	FALSE
LIFE-Heart	5854	C5OH+HMG	NT-proBNP (pg/ml)	-0.0226346	0.0113422	-1.99561	0.000680066	0.0460227	0.0834162	2.88198e-13	FALSE
LIFE-Adult	9621	C5OH+HMG	NT-proBNP (pg/ml)	-0.0874609	0.0147808	-5.91721	0.00362682	3.38633e-09	6.0954e-09	1.88417e-21	TRUE
LIFE-Heart	3040	C5OH+HMG	Number of plaques	0.0440968	0.0125462	3.51476	0.00404987	0.000446584	0.00107924	2.88198e-13	TRUE
LIFE-Adult	9235	C5OH+HMG	Number of plaques	0.0871051	0.00909526	9.57698	0.00983606	1.25918e-21	5.66632e-21	1.88417e-21	TRUE
LIFE-Heart	3099	C5OH+HMG	Peripheral artery disease	0.0940784	0.0545925	1.72328	0.00095798	0.0849369	0.136843	2.88198e-13	FALSE
LIFE-Adult	8721	C5OH+HMG	Peripheral artery disease	0.135506	0.0444353	3.0495	0.00106544	0.00229907	0.0034486	1.88417e-21	TRUE
LIFE-Heart	5859	C5OH+HMG	Main stem stenosis	0.018296	0.0473572	0.38634	2.54831e-05	0.699259	0.751056	2.88198e-13	FALSE
LIFE-Heart	5748	C5OH+HMG	CAD score	0.10956	0.0268069	4.08701	0.00289858	4.42918e-05	0.000142718	2.88198e-13	TRUE
LIFE-Heart	5685	C5OH+HMG	Valvular disease	-0.112231	0.0572405	-1.96068	0.000675996	0.0499646	0.0852338	2.88198e-13	FALSE
LIFE-Heart	3040	C5OH+HMG	Any plaques	0.130528	0.0352733	3.70048	0.00448719	0.000219013	0.000577397	2.88198e-13	TRUE
LIFE-Adult	9235	C5OH+HMG	Any plaques	0.168603	0.0193677	8.70537	0.00814106	3.71001e-18	1.113e-17	1.88417e-21	TRUE
LIFE-Heart	3039	C6	Ankle brachial index	-0.0665729	0.011438	-5.82031	0.0110314	6.48681e-09	9.40588e-08	5.28924e-08	TRUE
LIFE-Adult	8685	C6	Ankle brachial index	-0.0211026	0.0102692	-2.05494	0.000486092	0.0399143	0.0399143	1.80914e-19	TRUE
LIFE-Adult	8580	C6	Brachial-ankle pulse wave velocity	0.0851582	0.009076	9.38279	0.0101588	8.08209e-21	7.27388e-20	1.80914e-19	TRUE
LIFE-Adult	3935	C6	Brachial-femoral pulse wave velocity	0.0558133	0.0133086	4.19377	0.00445192	2.80402e-05	3.60517e-05	1.80914e-19	TRUE
LIFE-Heart	5749	C6	Number of vessel disease (50% stenosis)	0.0305679	0.0104031	2.93836	0.00150009	0.00331264	0.00897331	5.28924e-08	TRUE
LIFE-Adult	8200	C6	carotid-femoral pulse wave velocity	0.032953	0.00932427	3.53411	0.00152122	0.000411405	0.00046283	1.80914e-19	TRUE
LIFE-Heart	2970	C6	Carotid intima media thickness	0.0407244	0.014761	2.75892	0.002558	0.00583491	0.014101	5.28924e-08	TRUE
LIFE-Adult	9317	C6	Carotid intima media thickness	0.0531626	0.00882189	6.02621	0.00388344	1.74212e-09	3.91978e-09	1.80914e-19	TRUE
LIFE-Heart	4701	C6	Aortic bulb (mm)	0.0187098	0.0120077	1.55815	0.000516405	0.119264	0.182035	5.28924e-08	FALSE
LIFE-Heart	1537	C6	Deceleration time (ms)	0.0236853	0.0202494	1.16967	0.000890502	0.242314	0.334623	5.28924e-08	FALSE
LIFE-Heart	971	C6	End-diastolic volume (biplane, ml)	-0.0143525	0.0265683	-0.540213	0.000301076	0.589174	0.737439	5.28924e-08	FALSE
LIFE-Heart	1134	C6	Ejection Fraction (biplane, %)	-0.0461763	0.0246508	-1.87322	0.00309019	0.0612961	0.111099	5.28924e-08	FALSE
LIFE-Heart	1317	C6	Ejection Fraction (%)	-0.00494199	0.0232548	-0.212515	3.4343e-05	0.831738	0.861443	5.28924e-08	FALSE
LIFE-Heart	431	C6	E point-septal separation (mm)	-0.000233625	0.0413755	-0.00564647	7.43185e-08	0.995497	0.995497	5.28924e-08	FALSE
LIFE-Heart	977	C6	End-systolic volume (biplane, ml)	0.00974139	0.0266673	0.365293	0.000136842	0.714972	0.829367	5.28924e-08	FALSE
LIFE-Heart	1111	C6	Flow Propagation Velocity (cm/s)	0.00562966	0.023804	0.2365	5.04325e-05	0.813088	0.861443	5.28924e-08	FALSE
LIFE-Heart	4171	C6	Fractional shortening (%)	-0.03206	0.0127093	-2.52257	0.00152403	0.0116869	0.0252238	5.28924e-08	TRUE
LIFE-Heart	977	C6	Left ventricular mass (g)	0.0146626	0.026514	0.553013	0.000313567	0.580381	0.737439	5.28924e-08	FALSE
LIFE-Heart	2491	C6	Left ventricular function	0.0465938	0.0185721	2.50881	0.0025224	0.012177	0.0252238	5.28924e-08	TRUE
LIFE-Heart	5347	C6	Left ventricular internal diameter end diastole	0.00575619	0.0112937	0.509683	4.85994e-05	0.610295	0.737439	5.28924e-08	FALSE
LIFE-Heart	4182	C6	Left ventricular internal diameter end systole	0.0193757	0.0127067	1.52484	0.000555943	0.127375	0.184694	5.28924e-08	FALSE
LIFE-Heart	4683	C6	Back wall (M-mode, mm)	0.0443969	0.0120399	3.68748	0.00289641	0.000229057	0.00110711	5.28924e-08	TRUE
LIFE-Heart	1318	C6	Pulmonary venous flow diastolic (cm/s)	0.0339846	0.0217424	1.56305	0.00185305	0.118281	0.182035	5.28924e-08	FALSE
LIFE-Heart	1318	C6	Pulmonary venous flow systolic (cm/s)	-0.00514125	0.0217893	-0.235953	4.23037e-05	0.813505	0.861443	5.28924e-08	FALSE
LIFE-Heart	5452	C6	Septum (mm)	0.0388047	0.0112011	3.46436	0.00219732	0.00053559	0.00221887	5.28924e-08	TRUE
LIFE-Heart	2399	C6	Tricuspid annular plane systolic excursion (mm)	-0.0625882	0.0169557	-3.69129	0.00565232	0.000228095	0.00110711	5.28924e-08	TRUE
LIFE-Heart	5855	C6	NT-proBNP (pg/ml)	0.0609348	0.00992262	6.141	0.00640192	8.73941e-10	2.53443e-08	5.28924e-08	TRUE
LIFE-Adult	9623	C6	NT-proBNP (pg/ml)	0.105799	0.0135025	7.83549	0.00634088	5.16499e-15	2.32425e-14	1.80914e-19	TRUE
LIFE-Heart	3040	C6	Number of plaques	0.0444867	0.0107441	4.14058	0.00561164	3.55864e-05	0.000258002	5.28924e-08	TRUE
LIFE-Adult	9237	C6	Number of plaques	0.0628847	0.00832484	7.55387	0.00614082	4.62697e-14	1.38809e-13	1.80914e-19	TRUE
LIFE-Heart	3099	C6	Peripheral artery disease	0.263269	0.0468552	5.61878	0.0100911	2.09353e-08	2.02375e-07	5.28924e-08	TRUE
LIFE-Adult	8723	C6	Peripheral artery disease	0.170723	0.0406094	4.20402	0.00202248	2.64833e-05	3.60517e-05	1.80914e-19	TRUE
LIFE-Heart	5860	C6	Main stem stenosis	0.0731101	0.0415083	1.76133	0.000529303	0.0782339	0.133458	5.28924e-08	FALSE
LIFE-Heart	5749	C6	CAD score	0.0452103	0.0235207	1.92215	0.000642473	0.054636	0.10563	5.28924e-08	FALSE
LIFE-Heart	5686	C6	Valvular disease	0.15878	0.0503349	3.15448	0.0017476	0.00161624	0.00520787	5.28924e-08	TRUE
LIFE-Heart	3040	C6	Any plaques	0.0967616	0.0302476	3.19898	0.00335719	0.00139333	0.00505081	5.28924e-08	TRUE
LIFE-Adult	9237	C6	Any plaques	0.105653	0.0177354	5.95716	0.00382804	2.66036e-09	4.78865e-09	1.80914e-19	TRUE
LIFE-Heart	3039	C6DC	Ankle brachial index	-0.0478107	0.0104299	-4.584	0.00687149	4.74565e-06	4.58746e-05	9.11666e-11	TRUE
LIFE-Adult	8685	C6DC	Ankle brachial index	-0.00730599	0.0087526	-0.834722	8.02379e-05	0.403897	0.454384	1.50784e-07	FALSE
LIFE-Adult	8580	C6DC	Brachial-ankle pulse wave velocity	0.0295763	0.00776142	3.81068	0.00168999	0.000139554	0.000418662	1.50784e-07	TRUE
LIFE-Adult	3935	C6DC	Brachial-femoral pulse wave velocity	0.00636157	0.0115577	0.550417	7.7024e-05	0.582065	0.582065	1.50784e-07	FALSE
LIFE-Heart	5749	C6DC	Number of vessel disease (50% stenosis)	0.0303924	0.00918698	3.3082	0.00190071	0.000944757	0.0047751	9.11666e-11	TRUE
LIFE-Adult	8200	C6DC	carotid-femoral pulse wave velocity	0.0164409	0.00791676	2.07672	0.000525798	0.0378586	0.0486753	1.50784e-07	FALSE
LIFE-Heart	2970	C6DC	Carotid intima media thickness	0.0252792	0.0133094	1.89935	0.00121401	0.0576148	0.121169	9.11666e-11	FALSE
LIFE-Adult	9317	C6DC	Carotid intima media thickness	0.0322923	0.00756006	4.27143	0.00195485	1.96151e-05	8.82679e-05	1.50784e-07	TRUE
LIFE-Heart	4701	C6DC	Aortic bulb (mm)	-0.0131558	0.010453	-1.25858	0.000336982	0.208246	0.295554	9.11666e-11	FALSE
LIFE-Heart	1537	C6DC	Deceleration time (ms)	-0.0122555	0.0186173	-0.65829	0.00028223	0.510451	0.616795	9.11666e-11	FALSE
LIFE-Heart	971	C6DC	End-diastolic volume (biplane, ml)	-0.0270086	0.023389	-1.15475	0.00137423	0.248476	0.327536	9.11666e-11	FALSE
LIFE-Heart	1134	C6DC	Ejection Fraction (biplane, %)	0.00406411	0.0220259	0.184516	3.00751e-05	0.853642	0.884129	9.11666e-11	FALSE
LIFE-Heart	1317	C6DC	Ejection Fraction (%)	-0.0566323	0.0202092	-2.8023	0.00593633	0.00514838	0.0186629	9.11666e-11	TRUE
LIFE-Heart	431	C6DC	E point-septal separation (mm)	-0.0468166	0.0326814	-1.43252	0.00476069	0.152724	0.246055	9.11666e-11	FALSE
LIFE-Heart	977	C6DC	End-systolic volume (biplane, ml)	-0.0291511	0.0234448	-1.24339	0.00158316	0.214022	0.295554	9.11666e-11	FALSE
LIFE-Heart	1111	C6DC	Flow Propagation Velocity (cm/s)	0.0114169	0.0218791	0.521817	0.00024547	0.601902	0.698207	9.11666e-11	FALSE
LIFE-Heart	4171	C6DC	Fractional shortening (%)	-0.0218801	0.0109687	-1.99477	0.000953545	0.0461326	0.111487	9.11666e-11	FALSE
LIFE-Heart	977	C6DC	Left ventricular mass (g)	0.0419064	0.0224864	1.86363	0.00354954	0.0626737	0.121169	9.11666e-11	FALSE
LIFE-Heart	2491	C6DC	Left ventricular function	0.0415932	0.0157855	2.6349	0.00278159	0.00846846	0.0272872	9.11666e-11	TRUE
LIFE-Heart	5347	C6DC	Left ventricular internal diameter end diastole	0.01297	0.00980839	1.32233	0.000327033	0.186114	0.284069	9.11666e-11	FALSE
LIFE-Heart	4182	C6DC	Left ventricular internal diameter end systole	0.0176757	0.0109572	1.61316	0.00062217	0.106785	0.182163	9.11666e-11	FALSE
LIFE-Heart	4683	C6DC	Back wall (M-mode, mm)	0.0218451	0.0104503	2.09038	0.000932626	0.0366373	0.0965891	9.11666e-11	FALSE
LIFE-Heart	1318	C6DC	Pulmonary venous flow diastolic (cm/s)	0.0372648	0.0199969	1.86353	0.00263193	0.0626099	0.121169	9.11666e-11	FALSE
LIFE-Heart	1318	C6DC	Pulmonary venous flow systolic (cm/s)	-0.00516428	0.0200552	-0.257504	5.03835e-05	0.79683	0.855855	9.11666e-11	FALSE
LIFE-Heart	5452	C6DC	Septum (mm)	0.0347384	0.0097057	3.57917	0.00234503	0.000347684	0.00252071	9.11666e-11	TRUE
LIFE-Heart	2399	C6DC	Tricuspid annular plane systolic excursion (mm)	0.000371768	0.0144414	0.0257432	2.76477e-07	0.979464	0.979464	9.11666e-11	FALSE
LIFE-Heart	5855	C6DC	NT-proBNP (pg/ml)	0.0624717	0.0087745	7.11969	0.00858614	1.21163e-12	3.51371e-11	9.11666e-11	TRUE
LIFE-Adult	9623	C6DC	NT-proBNP (pg/ml)	0.0659829	0.011569	5.70341	0.00336963	1.20904e-08	1.08813e-07	1.50784e-07	TRUE
LIFE-Heart	3040	C6DC	Number of plaques	0.0215709	0.00978901	2.20358	0.00159579	0.0276286	0.080123	9.11666e-11	FALSE
LIFE-Adult	9237	C6DC	Number of plaques	0.0229147	0.00712805	3.21473	0.0011178	0.00131019	0.00294792	1.50784e-07	TRUE
LIFE-Heart	3099	C6DC	Peripheral artery disease	0.212064	0.0424261	4.99843	0.0080027	6.10101e-07	8.84647e-06	9.11666e-11	TRUE
LIFE-Adult	8723	C6DC	Peripheral artery disease	0.0733486	0.0346053	2.11958	0.000514884	0.0340696	0.0486753	1.50784e-07	FALSE
LIFE-Heart	5860	C6DC	Main stem stenosis	0.120981	0.0367098	3.2956	0.00185061	0.000987951	0.0047751	9.11666e-11	TRUE
LIFE-Heart	5749	C6DC	CAD score	0.00918524	0.0207817	0.441987	3.39909e-05	0.658515	0.734498	9.11666e-11	FALSE
LIFE-Heart	5686	C6DC	Valvular disease	0.136571	0.0442203	3.08843	0.0016753	0.00202189	0.00837639	9.11666e-11	TRUE
LIFE-Heart	3040	C6DC	Any plaques	0.0221142	0.0275467	0.80279	0.000212092	0.422159	0.532287	9.11666e-11	FALSE
LIFE-Adult	9237	C6DC	Any plaques	0.0462358	0.015169	3.04805	0.00100501	0.00230983	0.0041577	1.50784e-07	TRUE
LIFE-Heart	3039	C8	Ankle brachial index	-0.0740058	0.0124019	-5.96729	0.011589	2.69093e-09	3.90185e-08	3.00485e-11	TRUE
LIFE-Adult	8684	C8	Ankle brachial index	-0.0199977	0.0108738	-1.83907	0.000389411	0.0659389	0.0659389	4.07041e-31	FALSE
LIFE-Adult	8579	C8	Brachial-ankle pulse wave velocity	0.114838	0.00960917	11.9509	0.0163793	1.16564e-32	1.04908e-31	4.07041e-31	TRUE
LIFE-Adult	3934	C8	Brachial-femoral pulse wave velocity	0.078392	0.0140142	5.59374	0.00789493	2.37358e-08	3.05174e-08	4.07041e-31	TRUE
LIFE-Heart	5749	C8	Number of vessel disease (50% stenosis)	0.0551098	0.0110909	4.96891	0.00427779	6.92799e-07	6.69706e-06	3.00485e-11	TRUE
LIFE-Adult	8199	C8	carotid-femoral pulse wave velocity	0.0702544	0.00987323	7.11564	0.00613902	1.20782e-12	1.81173e-12	4.07041e-31	TRUE
LIFE-Heart	2970	C8	Carotid intima media thickness	0.0439486	0.0161168	2.72688	0.00249908	0.00643128	0.0176328	3.00485e-11	TRUE
LIFE-Adult	9316	C8	Carotid intima media thickness	0.0836483	0.00935721	8.93944	0.00850696	4.65796e-19	1.39739e-18	4.07041e-31	TRUE
LIFE-Heart	4701	C8	Aortic bulb (mm)	0.00101458	0.0129445	0.0783795	1.30737e-06	0.93753	0.979292	3.00485e-11	FALSE
LIFE-Heart	1537	C8	Deceleration time (ms)	-0.0182339	0.0225581	-0.80831	0.000425464	0.419037	0.528352	3.00485e-11	FALSE
LIFE-Heart	971	C8	End-diastolic volume (biplane, ml)	0.000442538	0.0288474	0.0153407	2.42865e-07	0.987764	0.987764	3.00485e-11	FALSE
LIFE-Heart	1134	C8	Ejection Fraction (biplane, %)	-0.0125389	0.0265599	-0.472097	0.000196848	0.636949	0.738861	3.00485e-11	FALSE
LIFE-Heart	1317	C8	Ejection Fraction (%)	-0.00899597	0.0247005	-0.364202	0.000100859	0.715766	0.798354	3.00485e-11	FALSE
LIFE-Heart	431	C8	E point-septal separation (mm)	-0.047399	0.0440911	-1.07503	0.00268665	0.282968	0.373003	3.00485e-11	FALSE
LIFE-Heart	977	C8	End-systolic volume (biplane, ml)	-0.00196916	0.0288112	-0.0683468	4.79104e-06	0.945524	0.979292	3.00485e-11	FALSE
LIFE-Heart	1111	C8	Flow Propagation Velocity (cm/s)	-0.0445299	0.0267784	-1.6629	0.00248725	0.0966146	0.164813	3.00485e-11	FALSE
LIFE-Heart	4171	C8	Fractional shortening (%)	-0.0370066	0.013697	-2.7018	0.00174789	0.00692451	0.0176328	3.00485e-11	TRUE
LIFE-Heart	977	C8	Left ventricular mass (g)	0.0136893	0.0286555	0.477719	0.000234012	0.632957	0.738861	3.00485e-11	FALSE
LIFE-Heart	2491	C8	Left ventricular function	0.0588556	0.0195296	3.01366	0.00363566	0.00260717	0.00945097	3.00485e-11	TRUE
LIFE-Heart	5347	C8	Left ventricular internal diameter end diastole	0.0144947	0.0121087	1.19705	0.000268014	0.231342	0.319472	3.00485e-11	FALSE
LIFE-Heart	4182	C8	Left ventricular internal diameter end systole	0.0348869	0.0136744	2.55126	0.00155474	0.0107686	0.0240223	3.00485e-11	TRUE
LIFE-Heart	4683	C8	Back wall (M-mode, mm)	0.0206062	0.0129292	1.59376	0.000542343	0.111056	0.169507	3.00485e-11	FALSE
LIFE-Heart	1318	C8	Pulmonary venous flow diastolic (cm/s)	0.0377827	0.0245924	1.53636	0.00179041	0.12469	0.180801	3.00485e-11	FALSE
LIFE-Heart	1318	C8	Pulmonary venous flow systolic (cm/s)	0.0457879	0.0245478	1.86526	0.00263679	0.0623677	0.120578	3.00485e-11	FALSE
LIFE-Heart	5452	C8	Septum (mm)	0.0205429	0.0120047	1.71124	0.00053702	0.0870942	0.157858	3.00485e-11	FALSE
LIFE-Heart	2399	C8	Tricuspid annular plane systolic excursion (mm)	-0.0290577	0.0181711	-1.59912	0.00106569	0.109926	0.169507	3.00485e-11	FALSE
LIFE-Heart	5855	C8	NT-proBNP (pg/ml)	0.0773205	0.0106093	7.28801	0.00899324	3.56178e-13	1.03292e-11	3.00485e-11	TRUE
LIFE-Adult	9622	C8	NT-proBNP (pg/ml)	0.131951	0.0143286	9.20894	0.0087384	3.98361e-20	1.79262e-19	4.07041e-31	TRUE
LIFE-Heart	3040	C8	Number of plaques	0.0564494	0.011701	4.82431	0.00760271	1.47411e-06	1.06873e-05	3.00485e-11	TRUE
LIFE-Adult	9236	C8	Number of plaques	0.0655202	0.00886831	7.38813	0.00587651	1.6184e-13	2.91312e-13	4.07041e-31	TRUE
LIFE-Heart	3099	C8	Peripheral artery disease	0.232489	0.0508741	4.56989	0.00669809	5.07067e-06	2.94099e-05	3.00485e-11	TRUE
LIFE-Adult	8722	C8	Peripheral artery disease	0.143206	0.0430219	3.32867	0.00126903	0.000876247	0.000985778	4.07041e-31	TRUE
LIFE-Heart	5860	C8	Main stem stenosis	0.176258	0.0443695	3.9725	0.00268664	7.19761e-05	0.000347884	3.00485e-11	TRUE
LIFE-Heart	5749	C8	CAD score	0.067376	0.0251032	2.68397	0.0012519	0.00729632	0.0176328	3.00485e-11	TRUE
LIFE-Heart	5686	C8	Valvular disease	0.106645	0.053864	1.97989	0.000689176	0.0477637	0.0989392	3.00485e-11	FALSE
LIFE-Heart	3040	C8	Any plaques	0.122185	0.0329557	3.70755	0.00450428	0.000213013	0.000882481	3.00485e-11	TRUE
LIFE-Adult	9236	C8	Any plaques	0.151502	0.0188626	8.03188	0.00693779	1.07754e-15	2.42448e-15	4.07041e-31	TRUE
LIFE-Heart	3039	C8:1	Ankle brachial index	-0.0268949	0.0122107	-2.20256	0.00159485	0.0277003	0.100414	2.48828e-06	FALSE
LIFE-Adult	8685	C8:1	Ankle brachial index	-0.0270538	0.0107765	-2.51044	0.000725296	0.012076	0.012076	6.79263e-26	TRUE
LIFE-Adult	8580	C8:1	Brachial-ankle pulse wave velocity	0.0933072	0.00952604	9.79496	0.0110609	1.55311e-22	4.65934e-22	6.79263e-26	TRUE
LIFE-Adult	3935	C8:1	Brachial-femoral pulse wave velocity	0.0671493	0.0140451	4.78098	0.0057782	1.80827e-06	2.7124e-06	6.79263e-26	TRUE
LIFE-Heart	5749	C8:1	Number of vessel disease (50% stenosis)	0.016894	0.010845	1.55777	0.000422069	0.119342	0.247209	2.48828e-06	FALSE
LIFE-Adult	8200	C8:1	carotid-femoral pulse wave velocity	0.0436489	0.00978261	4.46189	0.00242257	8.23258e-06	1.05847e-05	6.79263e-26	TRUE
LIFE-Heart	2970	C8:1	Carotid intima media thickness	0.0469955	0.0158651	2.96219	0.00294768	0.0030788	0.0297617	2.48828e-06	TRUE
LIFE-Adult	9317	C8:1	Carotid intima media thickness	0.100503	0.00924837	10.8671	0.0125191	2.41204e-27	2.17084e-26	6.79263e-26	TRUE
LIFE-Heart	4701	C8:1	Aortic bulb (mm)	-0.0143175	0.0125713	-1.1389	0.000275959	0.254803	0.434665	2.48828e-06	FALSE
LIFE-Heart	1537	C8:1	Deceleration time (ms)	-0.00573793	0.0219914	-0.260917	4.43482e-05	0.794192	0.896177	2.48828e-06	FALSE
LIFE-Heart	971	C8:1	End-diastolic volume (biplane, ml)	0.00786082	0.0274039	0.286851	8.49085e-05	0.774288	0.896177	2.48828e-06	FALSE
LIFE-Heart	1134	C8:1	Ejection Fraction (biplane, %)	-0.0295528	0.0256525	-1.15204	0.00117107	0.249547	0.434665	2.48828e-06	FALSE
LIFE-Heart	1317	C8:1	Ejection Fraction (%)	0.000121383	0.0238713	0.00508488	1.96624e-08	0.995944	0.995944	2.48828e-06	FALSE
LIFE-Heart	431	C8:1	E point-septal separation (mm)	-0.0289623	0.0418742	-0.691651	0.00111387	0.48953	0.698922	2.48828e-06	FALSE
LIFE-Heart	977	C8:1	End-systolic volume (biplane, ml)	0.00470279	0.0273994	0.171639	3.02143e-05	0.863757	0.927739	2.48828e-06	FALSE
LIFE-Heart	1111	C8:1	Flow Propagation Velocity (cm/s)	0.00284129	0.02565	0.110771	1.10642e-05	0.911818	0.944383	2.48828e-06	FALSE
LIFE-Heart	4171	C8:1	Fractional shortening (%)	-0.0216438	0.0133339	-1.62322	0.000631606	0.104619	0.239716	2.48828e-06	FALSE
LIFE-Heart	977	C8:1	Left ventricular mass (g)	0.0173726	0.0276678	0.6279	0.000404204	0.530216	0.698922	2.48828e-06	FALSE
LIFE-Heart	2491	C8:1	Left ventricular function	0.0046887	0.0188387	0.248886	2.48867e-05	0.803469	0.896177	2.48828e-06	FALSE
LIFE-Heart	5347	C8:1	Left ventricular internal diameter end diastole	-0.00835417	0.0117801	-0.709179	9.40856e-05	0.478244	0.698922	2.48828e-06	FALSE
LIFE-Heart	4182	C8:1	Left ventricular internal diameter end systole	-0.00590057	0.0132928	-0.443893	4.71369e-05	0.657143	0.828571	2.48828e-06	FALSE
LIFE-Heart	4683	C8:1	Back wall (M-mode, mm)	0.0361579	0.0126057	2.86839	0.00175458	0.00414416	0.0300451	2.48828e-06	TRUE
LIFE-Heart	1318	C8:1	Pulmonary venous flow diastolic (cm/s)	0.0182332	0.0234352	0.778028	0.000459764	0.436692	0.698922	2.48828e-06	FALSE
LIFE-Heart	1318	C8:1	Pulmonary venous flow systolic (cm/s)	-0.0376783	0.0233908	-1.61082	0.00196781	0.107459	0.239716	2.48828e-06	FALSE
LIFE-Heart	5452	C8:1	Septum (mm)	0.0411721	0.0116434	3.53609	0.00228905	0.000409475	0.00593738	2.48828e-06	TRUE
LIFE-Heart	2399	C8:1	Tricuspid annular plane systolic excursion (mm)	-0.0453192	0.0178117	-2.54435	0.00269348	0.0110104	0.0456147	2.48828e-06	FALSE
LIFE-Heart	5855	C8:1	NT-proBNP (pg/ml)	0.0566652	0.0103692	5.46477	0.0050764	4.82641e-08	1.39966e-06	2.48828e-06	TRUE
LIFE-Adult	9623	C8:1	NT-proBNP (pg/ml)	0.144542	0.0141987	10.1799	0.0106565	3.23304e-24	1.45487e-23	6.79263e-26	TRUE
LIFE-Heart	3040	C8:1	Number of plaques	0.0240663	0.0115	2.09272	0.00143949	0.0364566	0.117471	2.48828e-06	FALSE
LIFE-Adult	9237	C8:1	Number of plaques	0.0769143	0.00875212	8.78808	0.00829343	1.79384e-18	3.22891e-18	6.79263e-26	TRUE
LIFE-Heart	3099	C8:1	Peripheral artery disease	0.131436	0.0500568	2.62574	0.00222125	0.00868857	0.0419947	2.48828e-06	TRUE
LIFE-Adult	8723	C8:1	Peripheral artery disease	0.113334	0.0426383	2.65802	0.000809469	0.00787435	0.00885865	6.79263e-26	TRUE
LIFE-Heart	5860	C8:1	Main stem stenosis	0.063031	0.0433402	1.45433	0.000360928	0.145908	0.282089	2.48828e-06	FALSE
LIFE-Heart	5749	C8:1	CAD score	0.0158026	0.0245136	0.644648	7.23057e-05	0.519181	0.698922	2.48828e-06	FALSE
LIFE-Heart	5686	C8:1	Valvular disease	0.141139	0.0523693	2.69507	0.00127624	0.00705812	0.0409371	2.48828e-06	TRUE
LIFE-Heart	3040	C8:1	Any plaques	0.0621643	0.0323427	1.92205	0.00121454	0.054693	0.144191	2.48828e-06	FALSE
LIFE-Adult	9237	C8:1	Any plaques	0.174446	0.0186135	9.37205	0.00942153	8.79556e-21	1.979e-20	6.79263e-26	TRUE
LIFE-Heart	3039	Glut	Ankle brachial index	-0.0366829	0.0112315	-3.26608	0.00350014	0.00110261	0.00319757	4.91056e-10	TRUE
LIFE-Adult	8685	Glut	Ankle brachial index	0.00764052	0.0103392	0.738987	6.28892e-05	0.459935	0.459935	6.0282e-10	FALSE
LIFE-Adult	8580	Glut	Brachial-ankle pulse wave velocity	0.0607711	0.00919389	6.60995	0.00506761	4.07404e-11	3.66663e-10	6.0282e-10	TRUE
LIFE-Adult	3935	Glut	Brachial-femoral pulse wave velocity	0.0330313	0.0134881	2.44892	0.00152252	0.0143719	0.0215579	6.0282e-10	TRUE
LIFE-Heart	5749	Glut	Number of vessel disease (50% stenosis)	0.0408049	0.0100633	4.05483	0.00285275	5.08339e-05	0.000294837	4.91056e-10	TRUE
LIFE-Adult	8200	Glut	carotid-femoral pulse wave velocity	0.0176552	0.00945738	1.86682	0.000424926	0.0619621	0.0796656	6.0282e-10	FALSE
LIFE-Heart	2970	Glut	Carotid intima media thickness	0.0414063	0.0146134	2.83345	0.0026977	0.00463597	0.0112036	4.91056e-10	TRUE
LIFE-Adult	9317	Glut	Carotid intima media thickness	0.0479843	0.00891405	5.383	0.00310111	7.50362e-08	3.37663e-07	6.0282e-10	TRUE
LIFE-Heart	4701	Glut	Aortic bulb (mm)	0.027801	0.0116756	2.38111	0.00120512	0.0173001	0.0295119	4.91056e-10	TRUE
LIFE-Heart	1537	Glut	Deceleration time (ms)	0.00910768	0.0197834	0.460371	0.000138053	0.645315	0.668362	4.91056e-10	FALSE
LIFE-Heart	971	Glut	End-diastolic volume (biplane, ml)	0.0520366	0.0265666	1.95872	0.00394371	0.0504321	0.0731266	4.91056e-10	FALSE
LIFE-Heart	1134	Glut	Ejection Fraction (biplane, %)	-0.0785483	0.0246867	-3.1818	0.00886408	0.00150342	0.00396355	4.91056e-10	TRUE
LIFE-Heart	1317	Glut	Ejection Fraction (%)	-0.0345352	0.022724	-1.51977	0.00175335	0.128809	0.149418	4.91056e-10	FALSE
LIFE-Heart	431	Glut	E point-septal separation (mm)	0.0280632	0.0407117	0.689313	0.00110636	0.490999	0.527369	4.91056e-10	FALSE
LIFE-Heart	977	Glut	End-systolic volume (biplane, ml)	0.0576897	0.0267386	2.15755	0.00475169	0.0312067	0.0476313	4.91056e-10	FALSE
LIFE-Heart	1111	Glut	Flow Propagation Velocity (cm/s)	-0.0261371	0.0231973	-1.12673	0.00114343	0.260101	0.290113	4.91056e-10	FALSE
LIFE-Heart	4171	Glut	Fractional shortening (%)	-0.0464006	0.0123873	-3.74582	0.0033543	0.000182238	0.000660613	4.91056e-10	TRUE
LIFE-Heart	977	Glut	Left ventricular mass (g)	0.0734239	0.0264128	2.77986	0.00786342	0.00554293	0.0123234	4.91056e-10	TRUE
LIFE-Heart	2491	Glut	Left ventricular function	0.0458857	0.0176058	2.60628	0.00272167	0.00920765	0.0166889	4.91056e-10	TRUE
LIFE-Heart	5347	Glut	Left ventricular internal diameter end diastole	0.025401	0.0109066	2.32895	0.00101375	0.0198988	0.0320592	4.91056e-10	TRUE
LIFE-Heart	4182	Glut	Left ventricular internal diameter end systole	0.0522548	0.0123925	4.21666	0.00423563	2.53191e-05	0.000183564	4.91056e-10	TRUE
LIFE-Heart	4683	Glut	Back wall (M-mode, mm)	0.0425461	0.0116634	3.64783	0.00283463	0.000267346	0.000861447	4.91056e-10	TRUE
LIFE-Heart	1318	Glut	Pulmonary venous flow diastolic (cm/s)	0.0338209	0.0212456	1.59191	0.00192196	0.111646	0.134905	4.91056e-10	FALSE
LIFE-Heart	1318	Glut	Pulmonary venous flow systolic (cm/s)	-0.0061323	0.0211906	-0.289388	6.36321e-05	0.77233	0.77233	4.91056e-10	FALSE
LIFE-Heart	5452	Glut	Septum (mm)	0.0465645	0.0107673	4.32462	0.00341988	1.55525e-05	0.000150341	4.91056e-10	TRUE
LIFE-Heart	2399	Glut	Tricuspid annular plane systolic excursion (mm)	-0.026857	0.0165467	-1.6231	0.00109786	0.104699	0.132011	4.91056e-10	FALSE
LIFE-Heart	5855	Glut	NT-proBNP (pg/ml)	0.0659926	0.00959996	6.87425	0.00800904	6.87902e-12	1.99492e-10	4.91056e-10	TRUE
LIFE-Adult	9623	Glut	NT-proBNP (pg/ml)	0.0658571	0.0136505	4.8245	0.00241343	1.4251e-06	2.56518e-06	6.0282e-10	TRUE
LIFE-Heart	3040	Glut	Number of plaques	0.0526324	0.0105673	4.98069	0.00809952	6.68988e-07	9.70033e-06	4.91056e-10	TRUE
LIFE-Adult	9237	Glut	Number of plaques	0.0430927	0.00842359	5.11572	0.00282584	3.1883e-07	9.56489e-07	6.0282e-10	TRUE
LIFE-Heart	3099	Glut	Peripheral artery disease	0.17652	0.0459392	3.84246	0.00474474	0.00012425	0.00051475	4.91056e-10	TRUE
LIFE-Adult	8723	Glut	Peripheral artery disease	0.0372218	0.0409206	0.909609	9.48641e-05	0.363054	0.408436	6.0282e-10	FALSE
LIFE-Heart	5860	Glut	Main stem stenosis	0.109025	0.0401901	2.71272	0.00125463	0.00669282	0.0129395	4.91056e-10	TRUE
LIFE-Heart	5749	Glut	CAD score	0.0431732	0.0227681	1.89622	0.000625264	0.0579815	0.0800696	4.91056e-10	FALSE
LIFE-Heart	5686	Glut	Valvular disease	0.0870548	0.0486729	1.78857	0.000562489	0.0737373	0.0971991	4.91056e-10	FALSE
LIFE-Heart	3040	Glut	Any plaques	0.11818	0.0297601	3.97108	0.00516393	7.32073e-05	0.000353835	4.91056e-10	TRUE
LIFE-Adult	9237	Glut	Any plaques	0.0877686	0.0179271	4.89586	0.00258878	9.95359e-07	2.23956e-06	6.0282e-10	TRUE
LIFE-Heart	3039	MeGlut	Ankle brachial index	-0.0471192	0.0103317	-4.56065	0.00680213	5.30124e-06	5.12453e-05	4.65336e-11	TRUE
LIFE-Adult	8685	MeGlut	Ankle brachial index	-0.00835995	0.00882273	-0.947546	0.000103392	0.343387	0.38631	6.41139e-07	FALSE
LIFE-Adult	8580	MeGlut	Brachial-ankle pulse wave velocity	0.0292914	0.00783029	3.74079	0.00162867	0.00018464	0.00055392	6.41139e-07	TRUE
LIFE-Adult	3935	MeGlut	Brachial-femoral pulse wave velocity	0.00567664	0.0116408	0.487651	6.04601e-05	0.625824	0.625824	6.41139e-07	FALSE
LIFE-Heart	5749	MeGlut	Number of vessel disease (50% stenosis)	0.029831	0.00911257	3.27361	0.00186124	0.00106811	0.00619505	4.65336e-11	TRUE
LIFE-Adult	8200	MeGlut	carotid-femoral pulse wave velocity	0.017735	0.00799489	2.2183	0.000599889	0.0265618	0.0398427	6.41139e-07	TRUE
LIFE-Heart	2970	MeGlut	Carotid intima media thickness	0.0243782	0.0132712	1.83692	0.0011356	0.066321	0.138714	4.65336e-11	FALSE
LIFE-Adult	9317	MeGlut	Carotid intima media thickness	0.032221	0.00760768	4.23533	0.00192201	2.30408e-05	0.000103684	6.41139e-07	TRUE
LIFE-Heart	4701	MeGlut	Aortic bulb (mm)	-0.0144828	0.0104104	-1.39118	0.000411703	0.164236	0.255557	4.65336e-11	FALSE
LIFE-Heart	1537	MeGlut	Deceleration time (ms)	-0.010746	0.0186804	-0.575258	0.000215538	0.565201	0.655633	4.65336e-11	FALSE
LIFE-Heart	971	MeGlut	End-diastolic volume (biplane, ml)	-0.0256751	0.0226027	-1.13593	0.00132984	0.256268	0.337807	4.65336e-11	FALSE
LIFE-Heart	1134	MeGlut	Ejection Fraction (biplane, %)	0.00387409	0.021509	0.180115	2.86577e-05	0.857094	0.899394	4.65336e-11	FALSE
LIFE-Heart	1317	MeGlut	Ejection Fraction (%)	-0.0521845	0.019873	-2.62589	0.00521623	0.00874251	0.0316916	4.65336e-11	TRUE
LIFE-Heart	431	MeGlut	E point-septal separation (mm)	-0.0449188	0.0324831	-1.38284	0.00443766	0.167434	0.255557	4.65336e-11	FALSE
LIFE-Heart	977	MeGlut	End-systolic volume (biplane, ml)	-0.0284603	0.0226804	-1.25484	0.00161239	0.209838	0.304264	4.65336e-11	FALSE
LIFE-Heart	1111	MeGlut	Flow Propagation Velocity (cm/s)	0.0133636	0.0219334	0.609279	0.000334623	0.542464	0.655478	4.65336e-11	FALSE
LIFE-Heart	4171	MeGlut	Fractional shortening (%)	-0.0234609	0.0109441	-2.1437	0.00110108	0.0321143	0.0798423	4.65336e-11	FALSE
LIFE-Heart	977	MeGlut	Left ventricular mass (g)	0.0407749	0.0222333	1.83395	0.00343777	0.0669655	0.138714	4.65336e-11	FALSE
LIFE-Heart	2491	MeGlut	Left ventricular function	0.0400339	0.0156566	2.557	0.00261997	0.0106168	0.0342096	4.65336e-11	TRUE
LIFE-Heart	5347	MeGlut	Left ventricular internal diameter end diastole	0.0119354	0.0097827	1.22005	0.000278413	0.222498	0.307259	4.65336e-11	FALSE
LIFE-Heart	4182	MeGlut	Left ventricular internal diameter end systole	0.0184531	0.0109327	1.68789	0.000681108	0.0915069	0.1561	4.65336e-11	FALSE
LIFE-Heart	4683	MeGlut	Back wall (M-mode, mm)	0.0226675	0.0104018	2.1792	0.00101348	0.0293668	0.0798423	4.65336e-11	FALSE
LIFE-Heart	1318	MeGlut	Pulmonary venous flow diastolic (cm/s)	0.0353219	0.0200316	1.76331	0.00235708	0.078081	0.144195	4.65336e-11	FALSE
LIFE-Heart	1318	MeGlut	Pulmonary venous flow systolic (cm/s)	-0.0033306	0.0200944	-0.165748	2.08753e-05	0.868381	0.899394	4.65336e-11	FALSE
LIFE-Heart	5452	MeGlut	Septum (mm)	0.0348554	0.00967082	3.60418	0.00237784	0.00031594	0.00229057	4.65336e-11	TRUE
LIFE-Heart	2399	MeGlut	Tricuspid annular plane systolic excursion (mm)	0.000885079	0.014365	0.0616137	1.58375e-06	0.950876	0.950876	4.65336e-11	FALSE
LIFE-Heart	5855	MeGlut	NT-proBNP (pg/ml)	0.0628346	0.00870256	7.22024	0.00882823	5.85013e-13	1.69654e-11	4.65336e-11	TRUE
LIFE-Adult	9623	MeGlut	NT-proBNP (pg/ml)	0.0633771	0.0116485	5.44079	0.00306739	5.43463e-08	4.89116e-07	6.41139e-07	TRUE
LIFE-Heart	3040	MeGlut	Number of plaques	0.0206791	0.00969668	2.13259	0.00149478	0.0330382	0.0798423	4.65336e-11	FALSE
LIFE-Adult	9237	MeGlut	Number of plaques	0.0220398	0.00717152	3.07323	0.00102167	0.00212371	0.00477835	6.41139e-07	TRUE
LIFE-Heart	3099	MeGlut	Peripheral artery disease	0.203016	0.042058	4.82704	0.00746734	1.45285e-06	2.10664e-05	4.65336e-11	TRUE
LIFE-Adult	8723	MeGlut	Peripheral artery disease	0.0701638	0.0348851	2.01128	0.000463638	0.0443262	0.0569908	6.41139e-07	FALSE
LIFE-Heart	5860	MeGlut	Main stem stenosis	0.11071	0.036417	3.04006	0.00157518	0.00237576	0.0113961	4.65336e-11	TRUE
LIFE-Heart	5749	MeGlut	CAD score	0.00975563	0.0206129	0.473278	3.89739e-05	0.636033	0.709421	4.65336e-11	FALSE
LIFE-Heart	5686	MeGlut	Valvular disease	0.131306	0.0438327	2.99561	0.00157627	0.00275078	0.0113961	4.65336e-11	TRUE
LIFE-Heart	3040	MeGlut	Any plaques	0.0228076	0.0272852	0.835897	0.000229942	0.403279	0.508482	4.65336e-11	FALSE
LIFE-Adult	9237	MeGlut	Any plaques	0.0454356	0.0152611	2.97721	0.000958884	0.00291637	0.00524947	6.41139e-07	TRUE
LIFE-Heart	3039	MMA	Ankle brachial index	2.16566e-05	0.013574	0.00159544	8.38144e-10	0.998727	0.998727	0.38757	FALSE
LIFE-Adult	8685	MMA	Ankle brachial index	0.0249677	0.0111743	2.23438	0.000574639	0.0254834	0.038225	6.06638e-06	TRUE
LIFE-Adult	8580	MMA	Brachial-ankle pulse wave velocity	0.0498905	0.00993907	5.01963	0.00292876	5.28116e-07	4.75304e-06	6.06638e-06	TRUE
LIFE-Adult	3935	MMA	Brachial-femoral pulse wave velocity	-0.00326812	0.0145032	-0.225339	1.29104e-05	0.821728	0.821728	6.06638e-06	FALSE
LIFE-Heart	5749	MMA	Number of vessel disease (50% stenosis)	0.0266452	0.0120018	2.2201	0.000856906	0.0264505	0.383533	0.38757	FALSE
LIFE-Adult	8200	MMA	carotid-femoral pulse wave velocity	0.0180623	0.0101851	1.7734	0.000383476	0.0761997	0.0979711	6.06638e-06	FALSE
LIFE-Heart	2970	MMA	Carotid intima media thickness	0.00154151	0.0175398	0.0878863	2.60242e-06	0.929973	0.963186	0.38757	FALSE
LIFE-Adult	9317	MMA	Carotid intima media thickness	0.0245581	0.00965969	2.54232	0.000693389	0.0110279	0.0323861	6.06638e-06	TRUE
LIFE-Heart	4701	MMA	Aortic bulb (mm)	0.00731076	0.0139772	0.523049	5.82175e-05	0.600965	0.803792	0.38757	FALSE
LIFE-Heart	1537	MMA	Deceleration time (ms)	0.0437688	0.0241116	1.81526	0.00214209	0.0696789	0.385553	0.38757	FALSE
LIFE-Heart	971	MMA	End-diastolic volume (biplane, ml)	0.040221	0.0312452	1.28727	0.00170715	0.198309	0.531154	0.38757	FALSE
LIFE-Heart	1134	MMA	Ejection Fraction (biplane, %)	-0.020985	0.0288749	-0.726754	0.000466364	0.467527	0.803792	0.38757	FALSE
LIFE-Heart	1317	MMA	Ejection Fraction (%)	0.0241113	0.0266322	0.905346	0.000622921	0.365448	0.747294	0.38757	FALSE
LIFE-Heart	431	MMA	E point-septal separation (mm)	0.00437459	0.0469327	0.0932098	2.02515e-05	0.92578	0.963186	0.38757	FALSE
LIFE-Heart	977	MMA	End-systolic volume (biplane, ml)	0.0221821	0.03119	0.711194	0.000518497	0.477134	0.803792	0.38757	FALSE
LIFE-Heart	1111	MMA	Flow Propagation Velocity (cm/s)	0.00817628	0.0286678	0.285208	7.33433e-05	0.775538	0.899624	0.38757	FALSE
LIFE-Heart	4171	MMA	Fractional shortening (%)	-0.0201879	0.0148912	-1.35569	0.000440652	0.175272	0.531154	0.38757	FALSE
LIFE-Heart	977	MMA	Left ventricular mass (g)	0.0372605	0.0309548	1.20371	0.00148386	0.228995	0.539903	0.38757	FALSE
LIFE-Heart	2491	MMA	Left ventricular function	-0.00705028	0.0209308	-0.336837	4.55822e-05	0.736268	0.889657	0.38757	FALSE
LIFE-Heart	5347	MMA	Left ventricular internal diameter end diastole	-0.00184338	0.0130861	-0.140866	3.71246e-06	0.887981	0.963186	0.38757	FALSE
LIFE-Heart	4182	MMA	Left ventricular internal diameter end systole	0.00641754	0.0148816	0.431241	4.44882e-05	0.666315	0.840137	0.38757	FALSE
LIFE-Heart	4683	MMA	Back wall (M-mode, mm)	0.0270482	0.0140038	1.93149	0.000796339	0.0534834	0.385553	0.38757	FALSE
LIFE-Heart	1318	MMA	Pulmonary venous flow diastolic (cm/s)	0.0134073	0.025954	0.51658	0.000202736	0.605536	0.803792	0.38757	FALSE
LIFE-Heart	1318	MMA	Pulmonary venous flow systolic (cm/s)	0.033176	0.0259592	1.27801	0.00123957	0.201472	0.531154	0.38757	FALSE
LIFE-Heart	5452	MMA	Septum (mm)	0.0296365	0.0129555	2.28756	0.000959246	0.0222015	0.383533	0.38757	FALSE
LIFE-Heart	2399	MMA	Tricuspid annular plane systolic excursion (mm)	-0.0125849	0.0196945	-0.639003	0.000170319	0.522882	0.803792	0.38757	FALSE
LIFE-Heart	5855	MMA	NT-proBNP (pg/ml)	-0.0180665	0.0114961	-1.57153	0.000421779	0.116113	0.48104	0.38757	FALSE
LIFE-Adult	9623	MMA	NT-proBNP (pg/ml)	-0.0587609	0.0147773	-3.97642	0.00164078	7.04733e-05	0.00031713	6.06638e-06	TRUE
LIFE-Heart	3040	MMA	Number of plaques	0.0148414	0.0126831	1.17017	0.000450518	0.242026	0.539903	0.38757	FALSE
LIFE-Adult	9237	MMA	Number of plaques	0.022346	0.00912921	2.44774	0.000648356	0.0143938	0.0323861	6.06638e-06	TRUE
LIFE-Heart	3099	MMA	Peripheral artery disease	0.0282087	0.0552626	0.510449	8.41253e-05	0.609773	0.803792	0.38757	FALSE
LIFE-Adult	8723	MMA	Peripheral artery disease	0.0664709	0.0442694	1.50151	0.00025845	0.133261	0.149918	6.06638e-06	FALSE
LIFE-Heart	5860	MMA	Main stem stenosis	0.0875363	0.0479416	1.82589	0.000568793	0.0679173	0.385553	0.38757	FALSE
LIFE-Heart	5749	MMA	CAD score	0.0475373	0.027128	1.75234	0.000534024	0.0797695	0.385553	0.38757	FALSE
LIFE-Heart	5686	MMA	Valvular disease	-0.0353415	0.0581291	-0.607983	6.5028e-05	0.543223	0.803792	0.38757	FALSE
LIFE-Heart	3040	MMA	Any plaques	0.0494718	0.0356628	1.38721	0.000633024	0.16548	0.531154	0.38757	FALSE
LIFE-Adult	9237	MMA	Any plaques	0.0450083	0.0194272	2.31677	0.000580868	0.020538	0.0369683	6.06638e-06	TRUE
LIFE-Heart	3031	AC-total	Ankle brachial index	-0.0739351	0.0133521	-5.53733	0.0100214	3.33381e-08	5.37114e-08	1.89533e-34	TRUE
LIFE-Adult	8675	AC-total	Ankle brachial index	-0.0212031	0.0107062	-1.98045	0.000452024	0.0476846	0.0476846	1.45948e-94	FALSE
LIFE-Adult	8570	AC-total	Brachial-ankle pulse wave velocity	0.1971	0.00928513	21.2275	0.0499642	1.67179e-97	1.50461e-96	1.45948e-94	TRUE
LIFE-Adult	3935	AC-total	Brachial-femoral pulse wave velocity	0.0784764	0.0141607	5.54185	0.0077483	3.18918e-08	3.58783e-08	1.45948e-94	TRUE
LIFE-Heart	5737	AC-total	Number of vessel disease (50% stenosis)	0.0977792	0.0116226	8.41283	0.0121906	5.00054e-17	2.07165e-16	1.89533e-34	TRUE
LIFE-Adult	8193	AC-total	carotid-femoral pulse wave velocity	0.0780214	0.00967514	8.06411	0.00787665	8.42101e-16	1.51578e-15	1.45948e-94	TRUE
LIFE-Heart	2961	AC-total	Carotid intima media thickness	0.0671111	0.0173701	3.86361	0.00501945	0.00011412	0.000143891	1.89533e-34	TRUE
LIFE-Adult	9307	AC-total	Carotid intima media thickness	0.157949	0.00909034	17.3755	0.031426	1.41396e-66	3.18141e-66	1.45948e-94	TRUE
LIFE-Heart	4691	AC-total	Aortic bulb (mm)	0.0903239	0.0135332	6.67425	0.00941062	2.77345e-11	6.18693e-11	1.89533e-34	TRUE
LIFE-Heart	1537	AC-total	Deceleration time (ms)	-0.00119176	0.024341	-0.0489611	1.56168e-06	0.960957	0.960957	1.89533e-34	FALSE
LIFE-Heart	961	AC-total	End-diastolic volume (biplane, ml)	0.123621	0.0291999	4.23362	0.0183469	2.52071e-05	3.32275e-05	1.89533e-34	TRUE
LIFE-Heart	1125	AC-total	Ejection Fraction (biplane, %)	-0.133421	0.0269678	-4.94744	0.0213313	8.66781e-07	1.25683e-06	1.89533e-34	TRUE
LIFE-Heart	1309	AC-total	Ejection Fraction (%)	-0.0727653	0.0249116	-2.92094	0.00648553	0.00354963	0.00411757	1.89533e-34	TRUE
LIFE-Heart	425	AC-total	E point-septal separation (mm)	0.0621426	0.0438595	1.41686	0.00472342	0.15726	0.168909	1.89533e-34	FALSE
LIFE-Heart	968	AC-total	End-systolic volume (biplane, ml)	0.127472	0.0290564	4.38706	0.0195345	1.27521e-05	1.76101e-05	1.89533e-34	TRUE
LIFE-Heart	1111	AC-total	Flow Propagation Velocity (cm/s)	0.0198803	0.0291973	0.680895	0.000417876	0.49608	0.513797	1.89533e-34	FALSE
LIFE-Heart	4161	AC-total	Fractional shortening (%)	-0.109929	0.014362	-7.65414	0.0138909	2.40408e-14	6.97183e-14	1.89533e-34	TRUE
LIFE-Heart	969	AC-total	Left ventricular mass (g)	0.182971	0.0288764	6.33635	0.0398644	3.60109e-10	6.96211e-10	1.89533e-34	TRUE
LIFE-Heart	2488	AC-total	Left ventricular function	0.154299	0.019569	7.88486	0.0243983	4.67228e-15	1.50551e-14	1.89533e-34	TRUE
LIFE-Heart	5336	AC-total	Left ventricular internal diameter end diastole	0.124754	0.0126394	9.87022	0.0179366	8.77598e-23	6.36259e-22	1.89533e-34	TRUE
LIFE-Heart	4172	AC-total	Left ventricular internal diameter end systole	0.162433	0.0142302	11.4147	0.030299	9.72143e-30	1.40961e-28	1.89533e-34	TRUE
LIFE-Heart	4673	AC-total	Back wall (M-mode, mm)	0.128575	0.0135406	9.49555	0.0189377	3.39814e-21	1.97092e-20	1.89533e-34	TRUE
LIFE-Heart	1318	AC-total	Pulmonary venous flow diastolic (cm/s)	0.0998828	0.0262091	3.811	0.0109158	0.0001448	0.000174966	1.89533e-34	TRUE
LIFE-Heart	1318	AC-total	Pulmonary venous flow systolic (cm/s)	-0.0456742	0.0263205	-1.73531	0.00228299	0.0829206	0.0924884	1.89533e-34	FALSE
LIFE-Heart	5441	AC-total	Septum (mm)	0.125651	0.0124831	10.0658	0.0182877	1.25908e-23	1.21711e-22	1.89533e-34	TRUE
LIFE-Heart	2390	AC-total	Tricuspid annular plane systolic excursion (mm)	-0.113872	0.0188581	-6.03837	0.0150392	1.80025e-09	3.07102e-09	1.89533e-34	TRUE
LIFE-Heart	5843	AC-total	NT-proBNP (pg/ml)	0.141656	0.0110511	12.8183	0.0273604	4.08476e-37	1.18458e-35	1.89533e-34	TRUE
LIFE-Adult	9613	AC-total	NT-proBNP (pg/ml)	0.087128	0.0141298	6.16626	0.00394058	7.27405e-10	9.35235e-10	1.45948e-94	TRUE
LIFE-Heart	3033	AC-total	Number of plaques	0.115864	0.0124253	9.32485	0.0278878	2.07845e-20	1.00459e-19	1.89533e-34	TRUE
LIFE-Adult	9227	AC-total	Number of plaques	0.177299	0.00853835	20.7651	0.0446541	1.21481e-93	5.46663e-93	1.45948e-94	TRUE
LIFE-Heart	3090	AC-total	Peripheral artery disease	0.350691	0.0544759	6.43754	0.0132426	1.40288e-10	2.90597e-10	1.89533e-34	TRUE
LIFE-Adult	8713	AC-total	Peripheral artery disease	0.266662	0.042311	6.30243	0.00453913	3.07229e-10	4.60844e-10	1.45948e-94	TRUE
LIFE-Heart	5848	AC-total	Main stem stenosis	0.236742	0.0466049	5.07976	0.00439455	3.89642e-07	5.94716e-07	1.89533e-34	TRUE
LIFE-Heart	5737	AC-total	CAD score	0.162561	0.0263406	6.17151	0.00659742	7.22735e-10	1.30996e-09	1.89533e-34	TRUE
LIFE-Heart	5674	AC-total	Valvular disease	0.410806	0.0561553	7.31555	0.00934714	2.91956e-13	7.05561e-13	1.89533e-34	TRUE
LIFE-Heart	3033	AC-total	Any plaques	0.265648	0.0351055	7.56713	0.0185417	5.03021e-14	1.32615e-13	1.89533e-34	TRUE
LIFE-Adult	9227	AC-total	Any plaques	0.349387	0.0182232	19.1727	0.0383203	2.26242e-80	6.78725e-80	1.45948e-94	TRUE
LIFE-Heart	3038	Aba	Ankle brachial index	0.0122069	0.0122541	0.996151	0.000326743	0.319256	0.514357	3.10586e-12	FALSE
LIFE-Adult	8679	Aba	Ankle brachial index	0.0293655	0.0106441	2.75885	0.00087641	0.00581259	0.00871888	4.7515e-14	TRUE
LIFE-Adult	8575	Aba	Brachial-ankle pulse wave velocity	0.074058	0.00942658	7.8563	0.00714805	4.43491e-15	2.40024e-14	4.7515e-14	TRUE
LIFE-Adult	3933	Aba	Brachial-femoral pulse wave velocity	0.00514866	0.0141164	0.364729	3.38393e-05	0.715334	0.776675	4.7515e-14	FALSE
LIFE-Heart	5746	Aba	Number of vessel disease (50% stenosis)	0.0811879	0.0106715	7.60793	0.00997619	3.23527e-14	9.38228e-13	3.10586e-12	TRUE
LIFE-Adult	8196	Aba	carotid-femoral pulse wave velocity	0.0163283	0.00968626	1.68572	0.000346676	0.0918882	0.118142	4.7515e-14	FALSE
LIFE-Heart	2969	Aba	Carotid intima media thickness	0.0216083	0.0158009	1.36753	0.000629918	0.171562	0.355378	3.10586e-12	FALSE
LIFE-Adult	9311	Aba	Carotid intima media thickness	0.071901	0.0091806	7.83184	0.00654595	5.33387e-15	2.40024e-14	4.7515e-14	TRUE
LIFE-Heart	4699	Aba	Aortic bulb (mm)	0.0335719	0.0123761	2.71265	0.00156418	0.0066991	0.0277534	3.10586e-12	TRUE
LIFE-Heart	1536	Aba	Deceleration time (ms)	0.0028965	0.0217046	0.133451	1.16095e-05	0.893854	0.957197	3.10586e-12	FALSE
LIFE-Heart	971	Aba	End-diastolic volume (biplane, ml)	0.0386819	0.0275525	1.40393	0.00202996	0.160659	0.355378	3.10586e-12	FALSE
LIFE-Heart	1134	Aba	Ejection Fraction (biplane, %)	0.061897	0.025324	2.4442	0.0052498	0.014669	0.0531751	3.10586e-12	FALSE
LIFE-Heart	1317	Aba	Ejection Fraction (%)	0.0767196	0.0235414	3.25893	0.00801181	0.00114693	0.0055435	3.10586e-12	TRUE
LIFE-Heart	431	Aba	E point-septal separation (mm)	-0.00553948	0.0417203	-0.132777	4.1093e-05	0.894432	0.957197	3.10586e-12	FALSE
LIFE-Heart	977	Aba	End-systolic volume (biplane, ml)	-0.00147141	0.027408	-0.0536854	2.95602e-06	0.957197	0.957197	3.10586e-12	FALSE
LIFE-Heart	1110	Aba	Flow Propagation Velocity (cm/s)	0.0152198	0.0260175	0.584982	0.000308753	0.558679	0.67507	3.10586e-12	FALSE
LIFE-Heart	4169	Aba	Fractional shortening (%)	0.00114664	0.0131624	0.0871153	1.82123e-06	0.930584	0.957197	3.10586e-12	FALSE
LIFE-Heart	977	Aba	Left ventricular mass (g)	0.0444346	0.0272598	1.63004	0.00271775	0.103416	0.249922	3.10586e-12	FALSE
LIFE-Heart	2490	Aba	Left ventricular function	-0.0352477	0.0183693	-1.91883	0.00147769	0.0551196	0.159847	3.10586e-12	FALSE
LIFE-Heart	5345	Aba	Left ventricular internal diameter end diastole	0.045375	0.0116365	3.89938	0.00283773	9.76236e-05	0.000566217	3.10586e-12	TRUE
LIFE-Heart	4180	Aba	Left ventricular internal diameter end systole	0.0156973	0.0131355	1.19503	0.000341695	0.232144	0.420761	3.10586e-12	FALSE
LIFE-Heart	4681	Aba	Back wall (M-mode, mm)	0.0221237	0.0124052	1.78342	0.000679297	0.0745826	0.196627	3.10586e-12	FALSE
LIFE-Heart	1317	Aba	Pulmonary venous flow diastolic (cm/s)	0.0221622	0.0235627	0.940562	0.000672291	0.347102	0.525109	3.10586e-12	FALSE
LIFE-Heart	1317	Aba	Pulmonary venous flow systolic (cm/s)	0.0250899	0.0234896	1.06813	0.000866846	0.28566	0.487302	3.10586e-12	FALSE
LIFE-Heart	5450	Aba	Septum (mm)	0.0101255	0.011535	0.87781	0.000141417	0.380085	0.525109	3.10586e-12	FALSE
LIFE-Heart	2398	Aba	Tricuspid annular plane systolic excursion (mm)	-0.012811	0.0177014	-0.723729	0.00021856	0.469303	0.618626	3.10586e-12	FALSE
LIFE-Heart	5852	Aba	NT-proBNP (pg/ml)	-0.0213215	0.0102636	-2.07739	0.000737154	0.0378095	0.121831	3.10586e-12	FALSE
LIFE-Adult	9616	Aba	NT-proBNP (pg/ml)	-0.0671088	0.0140793	-4.76648	0.00235758	1.90219e-06	5.70658e-06	4.7515e-14	TRUE
LIFE-Heart	3039	Aba	Number of plaques	0.00145938	0.0115182	0.126702	5.28593e-06	0.899185	0.957197	3.10586e-12	FALSE
LIFE-Adult	9231	Aba	Number of plaques	0.0363914	0.00870226	4.18184	0.00189129	2.91836e-05	5.25305e-05	4.7515e-14	TRUE
LIFE-Heart	3098	Aba	Peripheral artery disease	0.0320609	0.0499832	0.641433	0.000132875	0.521289	0.657277	3.10586e-12	FALSE
LIFE-Adult	8717	Aba	Peripheral artery disease	0.0119719	0.0422044	0.283664	9.23287e-06	0.776675	0.776675	4.7515e-14	FALSE
LIFE-Heart	5857	Aba	Main stem stenosis	0.218664	0.0427094	5.11981	0.00445698	3.15617e-07	3.05097e-06	3.10586e-12	TRUE
LIFE-Heart	5746	Aba	CAD score	0.133814	0.0241754	5.53513	0.00530555	3.24776e-08	4.70925e-07	3.10586e-12	TRUE
LIFE-Heart	5684	Aba	Valvular disease	-0.0639548	0.051899	-1.23229	0.000267184	0.217891	0.420761	3.10586e-12	FALSE
LIFE-Heart	3039	Aba	Any plaques	0.0284238	0.0323896	0.877561	0.000253513	0.380251	0.525109	3.10586e-12	FALSE
LIFE-Adult	9231	Aba	Any plaques	0.0854568	0.0185152	4.61549	0.00230293	3.97453e-06	8.94269e-06	4.7515e-14	TRUE
LIFE-Heart	3039	Ala	Ankle brachial index	-0.00675246	0.0126696	-0.532964	9.35214e-05	0.594097	0.82503	0.00684513	FALSE
LIFE-Adult	8685	Ala	Ankle brachial index	-0.0201487	0.0113272	-1.77878	0.000364266	0.0753102	0.0753102	3.07761e-58	FALSE
LIFE-Adult	8580	Ala	Brachial-ankle pulse wave velocity	0.163814	0.00992472	16.5057	0.0307825	2.82026e-60	2.53823e-59	3.07761e-58	TRUE
LIFE-Adult	3935	Ala	Brachial-femoral pulse wave velocity	0.101382	0.0151005	6.71386	0.0113311	2.16689e-11	3.25033e-11	3.07761e-58	TRUE
LIFE-Heart	5749	Ala	Number of vessel disease (50% stenosis)	0.022991	0.0114046	2.01594	0.000706657	0.0438523	0.254343	0.00684513	FALSE
LIFE-Adult	8200	Ala	carotid-femoral pulse wave velocity	0.090983	0.0102802	8.85031	0.00946409	1.0561e-18	1.90098e-18	3.07761e-58	TRUE
LIFE-Heart	2970	Ala	Carotid intima media thickness	0.029074	0.0163644	1.77666	0.00106239	0.0757259	0.366009	0.00684513	FALSE
LIFE-Adult	9317	Ala	Carotid intima media thickness	0.110549	0.00970185	11.3946	0.0137469	7.01035e-30	3.15466e-29	3.07761e-58	TRUE
LIFE-Heart	4701	Ala	Aortic bulb (mm)	0.00669121	0.0131713	0.508016	5.49194e-05	0.611466	0.82503	0.00684513	FALSE
LIFE-Heart	1537	Ala	Deceleration time (ms)	0.0153536	0.0232479	0.660428	0.000284066	0.509078	0.82503	0.00684513	FALSE
LIFE-Heart	971	Ala	End-diastolic volume (biplane, ml)	-0.0257943	0.0277781	-0.928585	0.000889064	0.353335	0.82503	0.00684513	FALSE
LIFE-Heart	1134	Ala	Ejection Fraction (biplane, %)	0.00386336	0.0258629	0.149378	1.97116e-05	0.881282	0.981303	0.00684513	FALSE
LIFE-Heart	1317	Ala	Ejection Fraction (%)	0.0171909	0.024412	0.7042	0.000376967	0.481433	0.82503	0.00684513	FALSE
LIFE-Heart	431	Ala	E point-septal separation (mm)	0.0406363	0.0418052	0.972039	0.00219763	0.331579	0.82503	0.00684513	FALSE
LIFE-Heart	977	Ala	End-systolic volume (biplane, ml)	-0.0307184	0.0278679	-1.10228	0.00124463	0.27061	0.812121	0.00684513	FALSE
LIFE-Heart	1111	Ala	Flow Propagation Velocity (cm/s)	-0.0299204	0.0276848	-1.08075	0.00105212	0.280042	0.812121	0.00684513	FALSE
LIFE-Heart	4171	Ala	Fractional shortening (%)	-0.000328196	0.0140035	-0.0234368	1.31754e-07	0.981303	0.981303	0.00684513	FALSE
LIFE-Heart	977	Ala	Left ventricular mass (g)	-0.00157898	0.0276305	-0.0571463	3.34943e-06	0.95444	0.981303	0.00684513	FALSE
LIFE-Heart	2491	Ala	Left ventricular function	0.034023	0.0201177	1.6912	0.0011478	0.0909242	0.376686	0.00684513	FALSE
LIFE-Heart	5347	Ala	Left ventricular internal diameter end diastole	-0.00781289	0.012379	-0.631141	7.45199e-05	0.527975	0.82503	0.00684513	FALSE
LIFE-Heart	4182	Ala	Left ventricular internal diameter end systole	-0.000911279	0.0139879	-0.0651475	1.01536e-06	0.94806	0.981303	0.00684513	FALSE
LIFE-Heart	4683	Ala	Back wall (M-mode, mm)	-0.00278023	0.0132657	-0.20958	9.38329e-06	0.834005	0.967446	0.00684513	FALSE
LIFE-Heart	1318	Ala	Pulmonary venous flow diastolic (cm/s)	-0.0342021	0.0252457	-1.35477	0.00139274	0.175723	0.636996	0.00684513	FALSE
LIFE-Heart	1318	Ala	Pulmonary venous flow systolic (cm/s)	0.0185835	0.0252841	0.734988	0.000410323	0.462478	0.82503	0.00684513	FALSE
LIFE-Heart	5452	Ala	Septum (mm)	0.0099842	0.0122606	0.814335	0.000121662	0.415489	0.82503	0.00684513	FALSE
LIFE-Heart	2399	Ala	Tricuspid annular plane systolic excursion (mm)	-0.00538977	0.0184357	-0.292355	3.56565e-05	0.77004	0.940872	0.00684513	FALSE
LIFE-Heart	5855	Ala	NT-proBNP (pg/ml)	-0.0407434	0.0109078	-3.73524	0.00237806	0.000189323	0.00549036	0.00684513	TRUE
LIFE-Adult	9623	Ala	NT-proBNP (pg/ml)	0.039752	0.0149411	2.66058	0.000735213	0.00781356	0.00879026	3.07761e-58	TRUE
LIFE-Heart	3040	Ala	Number of plaques	-0.00702108	0.0119151	-0.589256	0.00011428	0.555733	0.82503	0.00684513	FALSE
LIFE-Adult	9237	Ala	Number of plaques	0.0867817	0.0091826	9.45067	0.00957874	4.19236e-21	9.43281e-21	3.07761e-58	TRUE
LIFE-Heart	3099	Ala	Peripheral artery disease	0.0252886	0.0516976	0.489164	7.72562e-05	0.624761	0.82503	0.00684513	FALSE
LIFE-Adult	8723	Ala	Peripheral artery disease	0.214551	0.0448064	4.7884	0.00262225	1.70885e-06	2.19709e-06	3.07761e-58	TRUE
LIFE-Heart	5860	Ala	Main stem stenosis	0.0127993	0.045535	0.281088	1.34874e-05	0.778653	0.940872	0.00684513	FALSE
LIFE-Heart	5749	Ala	CAD score	0.0587682	0.0257715	2.28036	0.00090401	0.0226227	0.197044	0.00684513	FALSE
LIFE-Heart	5686	Ala	Valvular disease	-0.121641	0.0550534	-2.20952	0.000858158	0.0271785	0.197044	0.00684513	FALSE
LIFE-Heart	3040	Ala	Any plaques	-0.0163373	0.0335071	-0.487577	7.82465e-05	0.625885	0.82503	0.00684513	FALSE
LIFE-Adult	9237	Ala	Any plaques	0.190986	0.0195335	9.77733	0.0102455	1.81039e-22	5.43117e-22	3.07761e-58	TRUE
LIFE-Heart	3039	Arg	Ankle brachial index	-0.00504707	0.0122806	-0.410981	5.56127e-05	0.681116	0.681116	0.00012198	FALSE
LIFE-Adult	8685	Arg	Ankle brachial index	0.037764	0.00808448	4.67117	0.00250664	3.03992e-06	5.47186e-06	1.39539e-07	TRUE
LIFE-Adult	8580	Arg	Brachial-ankle pulse wave velocity	0.0394124	0.00720636	5.46911	0.00347485	4.65018e-08	1.39505e-07	1.39539e-07	TRUE
LIFE-Adult	3935	Arg	Brachial-femoral pulse wave velocity	0.0109336	0.0107644	1.01571	0.000262242	0.309829	0.348558	1.39539e-07	FALSE
LIFE-Heart	5749	Arg	Number of vessel disease (50% stenosis)	0.0159162	0.0107464	1.48107	0.000381543	0.138643	0.222389	0.00012198	FALSE
LIFE-Adult	8200	Arg	carotid-femoral pulse wave velocity	-0.00307777	0.00738835	-0.416571	2.1167e-05	0.677003	0.677003	1.39539e-07	FALSE
LIFE-Heart	2970	Arg	Carotid intima media thickness	0.0227746	0.0158436	1.43746	0.000695707	0.150692	0.222389	0.00012198	FALSE
LIFE-Adult	9317	Arg	Carotid intima media thickness	0.039976	0.00698667	5.72175	0.00350228	1.0869e-08	9.78213e-08	1.39539e-07	TRUE
LIFE-Heart	4701	Arg	Aortic bulb (mm)	0.0580977	0.012395	4.6872	0.00465368	2.84796e-06	8.25908e-05	0.00012198	TRUE
LIFE-Heart	1537	Arg	Deceleration time (ms)	0.0281646	0.0218752	1.28751	0.00107876	0.19811	0.273581	0.00012198	FALSE
LIFE-Heart	971	Arg	End-diastolic volume (biplane, ml)	0.0389139	0.0272345	1.42884	0.00210247	0.153372	0.222389	0.00012198	FALSE
LIFE-Heart	1134	Arg	Ejection Fraction (biplane, %)	0.049573	0.0252006	1.96714	0.00340676	0.049411	0.0995918	0.00012198	FALSE
LIFE-Heart	1317	Arg	Ejection Fraction (%)	0.0755552	0.0234942	3.21591	0.00780333	0.00133195	0.00880239	0.00012198	TRUE
LIFE-Heart	431	Arg	E point-septal separation (mm)	-0.0287543	0.0412241	-0.697513	0.0011328	0.48586	0.563597	0.00012198	FALSE
LIFE-Heart	977	Arg	End-systolic volume (biplane, ml)	0.014034	0.027162	0.516675	0.000273723	0.6055	0.627125	0.00012198	FALSE
LIFE-Heart	1111	Arg	Flow Propagation Velocity (cm/s)	-0.0534669	0.0257855	-2.07353	0.00386196	0.0383537	0.0855581	0.00012198	FALSE
LIFE-Heart	4171	Arg	Fractional shortening (%)	0.00862691	0.0132117	0.652974	0.000102262	0.513809	0.573094	0.00012198	FALSE
LIFE-Heart	977	Arg	Left ventricular mass (g)	0.0584939	0.0270397	2.16326	0.00477676	0.0307636	0.081104	0.00012198	FALSE
LIFE-Heart	2491	Arg	Left ventricular function	-0.076023	0.0182936	-4.15572	0.00689071	3.35217e-05	0.000486065	0.00012198	TRUE
LIFE-Heart	5347	Arg	Left ventricular internal diameter end diastole	0.0175932	0.0116392	1.51155	0.000427282	0.130706	0.222389	0.00012198	FALSE
LIFE-Heart	4182	Arg	Left ventricular internal diameter end systole	0.007633	0.0131627	0.579896	8.04432e-05	0.562016	0.603647	0.00012198	FALSE
LIFE-Heart	4683	Arg	Back wall (M-mode, mm)	0.0370387	0.012502	2.96261	0.00187153	0.00306575	0.0148178	0.00012198	TRUE
LIFE-Heart	1318	Arg	Pulmonary venous flow diastolic (cm/s)	0.0168077	0.0233166	0.720848	0.000394694	0.471131	0.563597	0.00012198	FALSE
LIFE-Heart	1318	Arg	Pulmonary venous flow systolic (cm/s)	-0.0626627	0.0232426	-2.69603	0.0054929	0.00710659	0.0267865	0.00012198	TRUE
LIFE-Heart	5452	Arg	Septum (mm)	0.0308906	0.0115273	2.67977	0.00131591	0.00738938	0.0267865	0.00012198	TRUE
LIFE-Heart	2399	Arg	Tricuspid annular plane systolic excursion (mm)	0.0376075	0.0172623	2.17859	0.00197617	0.0294592	0.081104	0.00012198	FALSE
LIFE-Heart	5855	Arg	NT-proBNP (pg/ml)	-0.032592	0.0102724	-3.17278	0.00171695	0.00151765	0.00880239	0.00012198	TRUE
LIFE-Adult	9623	Arg	NT-proBNP (pg/ml)	-0.0335349	0.0107114	-3.13077	0.00101775	0.00174868	0.00262303	1.39539e-07	TRUE
LIFE-Heart	3040	Arg	Number of plaques	0.0242298	0.0114802	2.11058	0.00146413	0.0348899	0.0843174	0.00012198	FALSE
LIFE-Adult	9237	Arg	Number of plaques	0.0353966	0.00660222	5.36131	0.00310281	8.46151e-08	1.90384e-07	1.39539e-07	TRUE
LIFE-Heart	3099	Arg	Peripheral artery disease	0.0446147	0.0500789	0.890888	0.000256209	0.373058	0.491759	0.00012198	FALSE
LIFE-Adult	8723	Arg	Peripheral artery disease	-0.0619235	0.0320591	-1.93154	0.000427618	0.0534484	0.0687194	1.39539e-07	FALSE
LIFE-Heart	5860	Arg	Main stem stenosis	0.1371	0.0428226	3.20158	0.00174671	0.00137406	0.00880239	0.00012198	TRUE
LIFE-Heart	5749	Arg	CAD score	0.0460605	0.0242835	1.89678	0.000625633	0.0579074	0.104957	0.00012198	FALSE
LIFE-Heart	5686	Arg	Valvular disease	0.0369908	0.05179	0.714246	8.97435e-05	0.475104	0.563597	0.00012198	FALSE
LIFE-Heart	3040	Arg	Any plaques	0.0710774	0.0322812	2.20182	0.00159325	0.0277528	0.081104	0.00012198	FALSE
LIFE-Adult	9237	Arg	Any plaques	0.0778157	0.0140477	5.53938	0.00331165	3.11878e-08	1.39505e-07	1.39539e-07	TRUE
LIFE-Heart	566	Asn	Ankle brachial index	0.0342845	0.0229079	1.49662	0.0039557	0.135051	0.259714		FALSE
LIFE-Adult	8685	Asn	Ankle brachial index	0.00255941	0.00620648	0.412377	1.95845e-05	0.680073	0.680073	5.26046e-07	FALSE
LIFE-Adult	8580	Asn	Brachial-ankle pulse wave velocity	-0.0301915	0.00551041	-5.47899	0.00348737	4.39878e-08	3.9589e-07	5.26046e-07	TRUE
LIFE-Adult	3935	Asn	Brachial-femoral pulse wave velocity	-0.0184397	0.00775407	-2.37807	0.00143583	0.017451	0.0523529	5.26046e-07	FALSE
LIFE-Heart	3186	Asn	Number of vessel disease (50% stenosis)	-0.0264856	0.00982052	-2.69697	0.00227922	0.00703432	0.0351716		FALSE
LIFE-Adult	8200	Asn	carotid-femoral pulse wave velocity	-0.0202923	0.00563996	-3.59794	0.00157658	0.000322635	0.00145186	5.26046e-07	TRUE
LIFE-Heart	563	Asn	Carotid intima media thickness	-0.000323788	0.0260066	-0.0124502	2.76307e-07	0.990071	0.990071		FALSE
LIFE-Adult	9317	Asn	Carotid intima media thickness	-0.0120952	0.0053743	-2.25055	0.00054345	0.0244371	0.0549835	5.26046e-07	FALSE
LIFE-Heart	2153	Asn	Aortic bulb (mm)	-0.00364732	0.0111034	-0.328487	5.01619e-05	0.742576	0.807147		FALSE
LIFE-Heart	0	Asn	Deceleration time (ms)								FALSE
LIFE-Heart	581	Asn	End-diastolic volume (biplane, ml)	-0.0541087	0.0256291	-2.11122	0.00763937	0.0351814	0.0977262		FALSE
LIFE-Heart	730	Asn	Ejection Fraction (biplane, %)	0.056598	0.0217403	2.60337	0.00922394	0.00941921	0.0392467		FALSE
LIFE-Heart	868	Asn	Ejection Fraction (%)	0.0543752	0.0189885	2.86359	0.00938015	0.00428991	0.0268119		FALSE
LIFE-Heart	431	Asn	E point-septal separation (mm)	-0.106438	0.0316885	-3.35889	0.0256248	0.000852458	0.0106557		FALSE
LIFE-Heart	576	Asn	End-systolic volume (biplane, ml)	-0.0611685	0.0242989	-2.51733	0.0109195	0.0120959	0.0431996		FALSE
LIFE-Heart	0	Asn	Flow Propagation Velocity (cm/s)								FALSE
LIFE-Heart	1847	Asn	Fractional shortening (%)	0.0244523	0.0133697	1.82893	0.00180972	0.0675711	0.168928		FALSE
LIFE-Heart	536	Asn	Left ventricular mass (g)	-0.027054	0.0278084	-0.972872	0.0017693	0.331058	0.486849		FALSE
LIFE-Heart	2491	Asn	Left ventricular function	-0.0325086	0.0101554	-3.20111	0.00410008	0.00138622	0.0115519		FALSE
LIFE-Heart	2776	Asn	Left ventricular internal diameter end diastole	-0.0104945	0.00994029	-1.05575	0.000401647	0.291172	0.454957		FALSE
LIFE-Heart	1955	Asn	Left ventricular internal diameter end systole	-0.0260841	0.0122459	-2.13002	0.0023177	0.0332946	0.0977262		FALSE
LIFE-Heart	2143	Asn	Back wall (M-mode, mm)	0.00509378	0.0115026	0.442838	9.15867e-05	0.657928	0.747645		FALSE
LIFE-Heart	0	Asn	Pulmonary venous flow diastolic (cm/s)								FALSE
LIFE-Heart	0	Asn	Pulmonary venous flow systolic (cm/s)								FALSE
LIFE-Heart	2846	Asn	Septum (mm)	-0.00567773	0.0100908	-0.562661	0.000111305	0.57371	0.682988		FALSE
LIFE-Heart	2009	Asn	Tricuspid annular plane systolic excursion (mm)	0.0126212	0.0116658	1.08191	0.000582878	0.279425	0.454957		FALSE
LIFE-Heart	3211	Asn	NT-proBNP (pg/ml)	-0.0397563	0.00872607	-4.55604	0.00642696	5.40692e-06	0.000135173		FALSE
LIFE-Adult	9623	Asn	NT-proBNP (pg/ml)	-0.0149764	0.00819992	-1.82641	0.000346598	0.0678194	0.101729	5.26046e-07	FALSE
LIFE-Heart	562	Asn	Number of plaques	-0.0171114	0.0213476	-0.801562	0.00114601	0.423147	0.587704		FALSE
LIFE-Adult	9237	Asn	Number of plaques	-0.00951848	0.00506808	-1.87812	0.000381808	0.0603961	0.101729	5.26046e-07	FALSE
LIFE-Heart	576	Asn	Peripheral artery disease	-0.141946	0.0910917	-1.55828	0.00421254	0.119719	0.249414		FALSE
LIFE-Adult	8723	Asn	Peripheral artery disease	-0.0128621	0.0245878	-0.523109	3.13765e-05	0.600912	0.676026	5.26046e-07	FALSE
LIFE-Heart	3214	Asn	Main stem stenosis	-0.0586061	0.0339078	-1.7284	0.000929197	0.0840132	0.190939		FALSE
LIFE-Heart	3186	Asn	CAD score	-0.038569	0.0306147	-1.25982	0.000498226	0.207827	0.37112		FALSE
LIFE-Heart	3073	Asn	Valvular disease	-0.0238058	0.0401835	-0.592428	0.000114272	0.553608	0.682988		FALSE
LIFE-Heart	562	Asn	Any plaques	-0.013474	0.0679741	-0.198223	7.01598e-05	0.842943	0.878065		FALSE
LIFE-Adult	9237	Asn	Any plaques	-0.0182555	0.010785	-1.69267	0.000310151	0.0905521	0.116424	5.26046e-07	FALSE
LIFE-Heart	3039	Asp	Ankle brachial index	-0.0128028	0.00680328	-1.88186	0.00116472	0.0599507	0.158052	0.000419745	FALSE
LIFE-Adult	8685	Asp	Ankle brachial index	-0.0243682	0.00728936	-3.34298	0.0012854	0.000832339	0.00107015	2.53636e-21	TRUE
LIFE-Adult	8580	Asp	Brachial-ankle pulse wave velocity	0.0547033	0.006471	8.4536	0.00826217	3.28868e-17	1.47991e-16	2.53636e-21	TRUE
LIFE-Adult	3935	Asp	Brachial-femoral pulse wave velocity	0.0129388	0.00970038	1.33385	0.000452159	0.182332	0.205123	2.53636e-21	FALSE
LIFE-Heart	5749	Asp	Number of vessel disease (50% stenosis)	0.00555153	0.00614346	0.903648	0.000142068	0.36622	0.579038	0.000419745	FALSE
LIFE-Adult	8200	Asp	carotid-femoral pulse wave velocity	0.0321098	0.00661038	4.85748	0.00286989	1.21094e-06	1.81641e-06	2.53636e-21	TRUE
LIFE-Heart	2970	Asp	Carotid intima media thickness	0.0291229	0.00882311	3.30076	0.00365739	0.000975656	0.00948993	0.000419745	TRUE
LIFE-Adult	9317	Asp	Carotid intima media thickness	0.0617537	0.00628199	9.83029	0.0102676	1.07497e-22	9.67477e-22	2.53636e-21	TRUE
LIFE-Heart	4701	Asp	Aortic bulb (mm)	0.0155722	0.00709061	2.19617	0.00102537	0.0281287	0.0906368	0.000419745	FALSE
LIFE-Heart	1537	Asp	Deceleration time (ms)	0.0103045	0.012223	0.843041	0.000462795	0.399337	0.579038	0.000419745	FALSE
LIFE-Heart	971	Asp	End-diastolic volume (biplane, ml)	-0.0456687	0.0157337	-2.9026	0.00861966	0.0037847	0.0274391	0.000419745	TRUE
LIFE-Heart	1134	Asp	Ejection Fraction (biplane, %)	0.0159919	0.0143628	1.11342	0.00109395	0.265763	0.513808	0.000419745	FALSE
LIFE-Heart	1317	Asp	Ejection Fraction (%)	0.0124161	0.0135659	0.915239	0.000636601	0.360234	0.579038	0.000419745	FALSE
LIFE-Heart	431	Asp	E point-septal separation (mm)	0.0214524	0.0240888	0.890554	0.00184528	0.373668	0.579038	0.000419745	FALSE
LIFE-Heart	977	Asp	End-systolic volume (biplane, ml)	-0.0416097	0.0155716	-2.67216	0.00727028	0.00766221	0.035043	0.000419745	TRUE
LIFE-Heart	1111	Asp	Flow Propagation Velocity (cm/s)	0.00113591	0.0141649	0.0801918	5.79864e-06	0.936099	0.969531	0.000419745	FALSE
LIFE-Heart	4171	Asp	Fractional shortening (%)	0.00642034	0.00757107	0.84801	0.000172463	0.396481	0.579038	0.000419745	FALSE
LIFE-Heart	977	Asp	Left ventricular mass (g)	0.0110244	0.0155398	0.709432	0.000515932	0.478226	0.660407	0.000419745	FALSE
LIFE-Heart	2491	Asp	Left ventricular function	-0.0122965	0.0108199	-1.13647	0.000518638	0.25587	0.513808	0.000419745	FALSE
LIFE-Heart	5347	Asp	Left ventricular internal diameter end diastole	-0.00203284	0.00668076	-0.304283	1.73221e-05	0.760924	0.817289	0.000419745	FALSE
LIFE-Heart	4182	Asp	Left ventricular internal diameter end systole	-0.00303865	0.00756865	-0.401479	3.85596e-05	0.688088	0.798182	0.000419745	FALSE
LIFE-Heart	4683	Asp	Back wall (M-mode, mm)	0.0233854	0.00709122	3.2978	0.00231795	0.000981716	0.00948993	0.000419745	TRUE
LIFE-Heart	1318	Asp	Pulmonary venous flow diastolic (cm/s)	-0.00476118	0.0131317	-0.362571	9.98821e-05	0.716983	0.799712	0.000419745	FALSE
LIFE-Heart	1318	Asp	Pulmonary venous flow systolic (cm/s)	0.00705192	0.0131306	0.537059	0.000219126	0.591317	0.714509	0.000419745	FALSE
LIFE-Heart	5452	Asp	Septum (mm)	0.0136694	0.00658994	2.07429	0.000788859	0.0380993	0.110488	0.000419745	FALSE
LIFE-Heart	2399	Asp	Tricuspid annular plane systolic excursion (mm)	0.00606785	0.00991983	0.611689	0.000156072	0.540802	0.692149	0.000419745	FALSE
LIFE-Heart	5855	Asp	NT-proBNP (pg/ml)	-0.0259454	0.00586719	-4.42211	0.00332991	9.95084e-06	0.000288574	0.000419745	TRUE
LIFE-Adult	9623	Asp	NT-proBNP (pg/ml)	0.0111026	0.00967277	1.14782	0.000136919	0.251073	0.251073	2.53636e-21	FALSE
LIFE-Heart	3040	Asp	Number of plaques	0.0179399	0.00639359	2.80592	0.00258487	0.00504929	0.0292859	0.000419745	TRUE
LIFE-Adult	9237	Asp	Number of plaques	0.0356568	0.00594877	5.99399	0.00387533	2.12429e-09	6.37287e-09	2.53636e-21	TRUE
LIFE-Heart	3099	Asp	Peripheral artery disease	0.0380041	0.0276965	1.37216	0.000607582	0.170113	0.379482	0.000419745	FALSE
LIFE-Adult	8723	Asp	Peripheral artery disease	0.14111	0.0288448	4.89205	0.00273669	1.01578e-06	1.81641e-06	2.53636e-21	TRUE
LIFE-Heart	5860	Asp	Main stem stenosis	0.000186043	0.0245053	0.00759196	9.83916e-09	0.993943	0.993943	0.000419745	FALSE
LIFE-Heart	5749	Asp	CAD score	0.00832209	0.0138846	0.599377	6.25074e-05	0.548945	0.692149	0.000419745	FALSE
LIFE-Heart	5686	Asp	Valvular disease	-0.0747666	0.0295621	-2.52914	0.00112409	0.0114611	0.0415465	0.000419745	TRUE
LIFE-Heart	3040	Asp	Any plaques	0.0305464	0.0179941	1.69758	0.000947679	0.0896894	0.216749	0.000419745	FALSE
LIFE-Adult	9237	Asp	Any plaques	0.0742786	0.0126597	5.86732	0.00371387	4.58138e-09	1.03081e-08	2.53636e-21	TRUE
LIFE-Heart	3039	Carn	Ankle brachial index	0.00462463	0.0101498	0.455637	6.83539e-05	0.648684	0.968092	0.124802	FALSE
LIFE-Adult	8678	Carn	Ankle brachial index	-0.0059722	0.00877315	-0.680736	5.3409e-05	0.496057	0.721554	0.108415	FALSE
LIFE-Adult	8573	Carn	Brachial-ankle pulse wave velocity	-0.0154843	0.00780116	-1.98487	0.000459443	0.0471911	0.10618	0.108415	FALSE
LIFE-Adult	3929	Carn	Brachial-femoral pulse wave velocity	0.0230255	0.0115524	1.99313	0.00101058	0.0463166	0.10618	0.108415	FALSE
LIFE-Heart	5749	Carn	Number of vessel disease (50% stenosis)	-0.00245564	0.00826006	-0.297291	1.53785e-05	0.766255	0.968092	0.124802	FALSE
LIFE-Adult	8195	Carn	carotid-femoral pulse wave velocity	-0.00462972	0.00796757	-0.581071	4.12095e-05	0.561209	0.721554	0.108415	FALSE
LIFE-Heart	2970	Carn	Carotid intima media thickness	0.00527145	0.0131504	0.40086	5.41375e-05	0.688552	0.968092	0.124802	FALSE
LIFE-Adult	9310	Carn	Carotid intima media thickness	0.00286336	0.00756485	0.378509	1.53918e-05	0.705061	0.793194	0.108415	FALSE
LIFE-Heart	4701	Carn	Aortic bulb (mm)	0.00310598	0.00979987	0.316941	2.13768e-05	0.751302	0.968092	0.124802	FALSE
LIFE-Heart	1537	Carn	Deceleration time (ms)	-0.0270653	0.0197556	-1.37001	0.00122126	0.170885	0.951755	0.124802	FALSE
LIFE-Heart	971	Carn	End-diastolic volume (biplane, ml)	-0.0262215	0.0203066	-1.29128	0.00171779	0.196915	0.951755	0.124802	FALSE
LIFE-Heart	1134	Carn	Ejection Fraction (biplane, %)	0.0128537	0.018727	0.686373	0.000416	0.492619	0.968092	0.124802	FALSE
LIFE-Heart	1317	Carn	Ejection Fraction (%)	0.00801262	0.0171233	0.467936	0.000166485	0.639908	0.968092	0.124802	FALSE
LIFE-Heart	431	Carn	E point-septal separation (mm)	0.00517683	0.02886	0.179377	7.4997e-05	0.857726	0.968092	0.124802	FALSE
LIFE-Heart	977	Carn	End-systolic volume (biplane, ml)	-0.0198261	0.0202058	-0.981209	0.000986483	0.326733	0.968092	0.124802	FALSE
LIFE-Heart	1111	Carn	Flow Propagation Velocity (cm/s)	0.013355	0.0231721	0.576338	0.000299428	0.564504	0.968092	0.124802	FALSE
LIFE-Heart	4171	Carn	Fractional shortening (%)	0.000291839	0.01044	0.0279538	1.87435e-07	0.9777	0.9777	0.124802	FALSE
LIFE-Heart	977	Carn	Left ventricular mass (g)	-0.00483778	0.0203704	-0.23749	5.78444e-05	0.812326	0.968092	0.124802	FALSE
LIFE-Heart	2491	Carn	Left ventricular function	0.00187602	0.0124831	0.150285	9.07404e-06	0.880552	0.968092	0.124802	FALSE
LIFE-Heart	5347	Carn	Left ventricular internal diameter end diastole	-0.00125764	0.00901264	-0.139542	3.64303e-06	0.889027	0.968092	0.124802	FALSE
LIFE-Heart	4182	Carn	Left ventricular internal diameter end systole	-0.00128871	0.0103934	-0.123993	3.67804e-06	0.901327	0.968092	0.124802	FALSE
LIFE-Heart	4683	Carn	Back wall (M-mode, mm)	-0.00424972	0.00977503	-0.434752	4.03764e-05	0.663762	0.968092	0.124802	FALSE
LIFE-Heart	1318	Carn	Pulmonary venous flow diastolic (cm/s)	0.0277178	0.0211936	1.30784	0.00129804	0.191157	0.951755	0.124802	FALSE
LIFE-Heart	1318	Carn	Pulmonary venous flow systolic (cm/s)	-0.0139358	0.0211812	-0.657934	0.000328826	0.510695	0.968092	0.124802	FALSE
LIFE-Heart	5452	Carn	Septum (mm)	0.00819685	0.00891627	0.919314	0.000155047	0.357972	0.968092	0.124802	FALSE
LIFE-Heart	2399	Carn	Tricuspid annular plane systolic excursion (mm)	-0.0352708	0.0122403	-2.88154	0.00345207	0.00399256	0.115784	0.124802	FALSE
LIFE-Heart	5855	Carn	NT-proBNP (pg/ml)	-0.00367032	0.00790444	-0.464336	3.68358e-05	0.642424	0.968092	0.124802	FALSE
LIFE-Adult	9616	Carn	NT-proBNP (pg/ml)	0.00217703	0.0115804	0.187993	3.67601e-06	0.850886	0.850886	0.108415	FALSE
LIFE-Heart	3040	Carn	Number of plaques	0.00396816	0.00953661	0.416097	5.69872e-05	0.677368	0.968092	0.124802	FALSE
LIFE-Adult	9230	Carn	Number of plaques	0.0154061	0.0071361	2.15889	0.000504818	0.0308842	0.10618	0.108415	FALSE
LIFE-Heart	3099	Carn	Peripheral artery disease	-0.0199248	0.0415575	-0.47945	7.42187e-05	0.631652	0.968092	0.124802	FALSE
LIFE-Adult	8716	Carn	Peripheral artery disease	0.033269	0.0347999	0.956007	0.000104872	0.339095	0.610371	0.108415	FALSE
LIFE-Heart	5860	Carn	Main stem stenosis	-0.00241055	0.0329574	-0.0731414	9.13224e-07	0.941696	0.975328	0.124802	FALSE
LIFE-Heart	5749	Carn	CAD score	-0.038407	0.0186607	-2.05817	0.000736552	0.0396184	0.574467	0.124802	FALSE
LIFE-Heart	5686	Carn	Valvular disease	0.0432759	0.0399329	1.08371	0.000206579	0.278538	0.968092	0.124802	FALSE
LIFE-Heart	3040	Carn	Any plaques	-0.00494325	0.0268184	-0.184323	1.11832e-05	0.853772	0.968092	0.124802	FALSE
LIFE-Adult	9230	Carn	Any plaques	0.0307224	0.0151832	2.02345	0.000443492	0.0430552	0.10618	0.108415	FALSE
LIFE-Heart	3039	Cit	Ankle brachial index	-0.0619934	0.012104	-5.12172	0.00856352	3.21655e-07	2.332e-06	3.56187e-07	TRUE
LIFE-Adult	8685	Cit	Ankle brachial index	0.00655715	0.00912426	0.71865	5.94757e-05	0.472376	0.531423	1.67008e-43	FALSE
LIFE-Adult	8580	Cit	Brachial-ankle pulse wave velocity	0.0696194	0.0080828	8.61327	0.00857454	8.36371e-18	1.50547e-17	1.67008e-43	TRUE
LIFE-Adult	3935	Cit	Brachial-femoral pulse wave velocity	0.043451	0.0125019	3.47557	0.00306193	0.000515288	0.000662513	1.67008e-43	TRUE
LIFE-Heart	5749	Cit	Number of vessel disease (50% stenosis)	0.0139565	0.0104573	1.33461	0.000309838	0.182056	0.277875	3.56187e-07	FALSE
LIFE-Adult	8200	Cit	carotid-femoral pulse wave velocity	0.0322773	0.00826239	3.90653	0.00185809	9.43823e-05	0.000141573	1.67008e-43	TRUE
LIFE-Heart	2970	Cit	Carotid intima media thickness	0.0908482	0.0156104	5.8197	0.0112826	6.52498e-09	1.89224e-07	3.56187e-07	TRUE
LIFE-Adult	9317	Cit	Carotid intima media thickness	0.111443	0.00785286	14.1914	0.0211631	3.06086e-45	2.75477e-44	1.67008e-43	TRUE
LIFE-Heart	4701	Cit	Aortic bulb (mm)	0.0203731	0.0121659	1.6746	0.00059643	0.0940787	0.170518	3.56187e-07	FALSE
LIFE-Heart	1537	Cit	Deceleration time (ms)	0.0534122	0.0216073	2.47195	0.00396503	0.0135455	0.0357108	3.56187e-07	TRUE
LIFE-Heart	971	Cit	End-diastolic volume (biplane, ml)	-0.0500446	0.0269175	-1.85918	0.00355446	0.0633041	0.122388	3.56187e-07	FALSE
LIFE-Heart	1134	Cit	Ejection Fraction (biplane, %)	0.0116291	0.0247019	0.470775	0.000195747	0.637892	0.711495	3.56187e-07	FALSE
LIFE-Heart	1317	Cit	Ejection Fraction (%)	0.0462443	0.0229395	2.01592	0.00308093	0.044011	0.0975921	3.56187e-07	FALSE
LIFE-Heart	431	Cit	E point-septal separation (mm)	-0.00304211	0.0373552	-0.0814376	1.54592e-05	0.935132	0.935132	3.56187e-07	FALSE
LIFE-Heart	977	Cit	End-systolic volume (biplane, ml)	-0.0273026	0.0265958	-1.02657	0.00107971	0.304876	0.401882	3.56187e-07	FALSE
LIFE-Heart	1111	Cit	Flow Propagation Velocity (cm/s)	-0.0239996	0.0260742	-0.920435	0.000763349	0.357546	0.414753	3.56187e-07	FALSE
LIFE-Heart	4171	Cit	Fractional shortening (%)	0.012309	0.0129414	0.95114	0.000216951	0.341589	0.414753	3.56187e-07	FALSE
LIFE-Heart	977	Cit	Left ventricular mass (g)	0.00877872	0.0265933	0.330111	0.000111755	0.741387	0.796305	3.56187e-07	FALSE
LIFE-Heart	2491	Cit	Left ventricular function	-0.0752874	0.0174695	-4.30966	0.00740682	1.69862e-05	8.20999e-05	3.56187e-07	TRUE
LIFE-Heart	5347	Cit	Left ventricular internal diameter end diastole	-0.0367022	0.0113731	-3.22712	0.00194463	0.00125799	0.00364817	3.56187e-07	TRUE
LIFE-Heart	4182	Cit	Left ventricular internal diameter end systole	-0.0203316	0.012946	-1.57049	0.000589708	0.116377	0.198526	3.56187e-07	FALSE
LIFE-Heart	4683	Cit	Back wall (M-mode, mm)	0.0664383	0.0121873	5.45143	0.00630861	5.2533e-08	5.07819e-07	3.56187e-07	TRUE
LIFE-Heart	1318	Cit	Pulmonary venous flow diastolic (cm/s)	0.0264669	0.023326	1.13465	0.000977336	0.256728	0.354529	3.56187e-07	FALSE
LIFE-Heart	1318	Cit	Pulmonary venous flow systolic (cm/s)	-0.0354936	0.0232321	-1.52778	0.00177051	0.126807	0.2043	3.56187e-07	FALSE
LIFE-Heart	5452	Cit	Septum (mm)	0.0612462	0.0112071	5.46492	0.00545002	4.83676e-08	5.07819e-07	3.56187e-07	TRUE
LIFE-Heart	2399	Cit	Tricuspid annular plane systolic excursion (mm)	-0.00190655	0.0167252	-0.113992	5.42103e-06	0.909253	0.935132	3.56187e-07	FALSE
LIFE-Heart	5855	Cit	NT-proBNP (pg/ml)	0.0330406	0.0100062	3.30203	0.00185941	0.000965649	0.00311153	3.56187e-07	TRUE
LIFE-Adult	9623	Cit	NT-proBNP (pg/ml)	0.166675	0.0120111	13.8767	0.0196221	2.29204e-43	1.03142e-42	1.67008e-43	TRUE
LIFE-Heart	3040	Cit	Number of plaques	0.0449617	0.0113633	3.95675	0.00512693	7.77138e-05	0.000321957	3.56187e-07	TRUE
LIFE-Adult	9237	Cit	Number of plaques	0.0688638	0.00743847	9.25779	0.0091953	2.55478e-20	5.74826e-20	1.67008e-43	TRUE
LIFE-Heart	3099	Cit	Peripheral artery disease	0.246834	0.049387	4.99796	0.00800121	6.11583e-07	3.54718e-06	3.56187e-07	TRUE
LIFE-Adult	8723	Cit	Peripheral artery disease	0.00251718	0.0361602	0.0696119	5.55649e-07	0.944504	0.944504	1.67008e-43	FALSE
LIFE-Heart	5860	Cit	Main stem stenosis	0.0829063	0.0417517	1.9857	0.000672643	0.0471134	0.0975921	3.56187e-07	FALSE
LIFE-Heart	5749	Cit	CAD score	0.0223388	0.0236351	0.945155	0.000155417	0.344619	0.414753	3.56187e-07	FALSE
LIFE-Heart	5686	Cit	Valvular disease	0.0645935	0.0505963	1.27664	0.000286656	0.20178	0.292581	3.56187e-07	FALSE
LIFE-Heart	3040	Cit	Any plaques	0.116836	0.0319666	3.65494	0.00437792	0.000261593	0.000948274	3.56187e-07	TRUE
LIFE-Adult	9237	Cit	Any plaques	0.166538	0.0158073	10.5356	0.0118765	8.29552e-26	2.48866e-25	1.67008e-43	TRUE
LIFE-Heart	3039	Gln	Ankle brachial index	0.0183288	0.00743709	2.46452	0.00199595	0.0137748	0.0499338	9.1181e-05	FALSE
LIFE-Adult	8684	Gln	Ankle brachial index	-0.00275208	0.00649108	-0.423979	2.07043e-05	0.671592	0.75554	0.51263	FALSE
LIFE-Adult	8579	Gln	Brachial-ankle pulse wave velocity	-0.00646121	0.00577623	-1.11859	0.000145861	0.263348	0.562272	0.51263	FALSE
LIFE-Adult	3935	Gln	Brachial-femoral pulse wave velocity	-0.01339	0.00846839	-1.58118	0.000635274	0.113918	0.51263	0.51263	FALSE
LIFE-Heart	5749	Gln	Number of vessel disease (50% stenosis)	0.00421866	0.00661541	0.637702	7.07561e-05	0.523693	0.607484	9.1181e-05	FALSE
LIFE-Adult	8199	Gln	carotid-femoral pulse wave velocity	-0.00265209	0.00592406	-0.44768	2.44495e-05	0.654396	0.75554	0.51263	FALSE
LIFE-Heart	2970	Gln	Carotid intima media thickness	-0.0224909	0.00971134	-2.31595	0.00180388	0.020629	0.0598242	9.1181e-05	FALSE
LIFE-Adult	9316	Gln	Carotid intima media thickness	-0.00309096	0.00565189	-0.54689	3.21107e-05	0.584468	0.75554	0.51263	FALSE
LIFE-Heart	4701	Gln	Aortic bulb (mm)	-0.0184218	0.00766269	-2.40409	0.00122846	0.0162513	0.0523653	9.1181e-05	FALSE
LIFE-Heart	1537	Gln	Deceleration time (ms)	0.0100348	0.0128877	0.778632	0.000394807	0.436317	0.550138	9.1181e-05	FALSE
LIFE-Heart	971	Gln	End-diastolic volume (biplane, ml)	0.0356757	0.0172736	2.06534	0.00438279	0.0391566	0.103231	9.1181e-05	FALSE
LIFE-Heart	1134	Gln	Ejection Fraction (biplane, %)	-0.0105489	0.0160146	-0.658708	0.000383153	0.510217	0.607484	9.1181e-05	FALSE
LIFE-Heart	1317	Gln	Ejection Fraction (%)	-0.0232914	0.0148072	-1.57297	0.00187802	0.115966	0.240215	9.1181e-05	FALSE
LIFE-Heart	431	Gln	E point-septal separation (mm)	-0.0335721	0.0238092	-1.41005	0.0046132	0.15925	0.304997	9.1181e-05	FALSE
LIFE-Heart	977	Gln	End-systolic volume (biplane, ml)	0.0239872	0.0173972	1.37879	0.00194603	0.168274	0.304997	9.1181e-05	FALSE
LIFE-Heart	1111	Gln	Flow Propagation Velocity (cm/s)	-0.0150498	0.015163	-0.992532	0.000887507	0.321155	0.443499	9.1181e-05	FALSE
LIFE-Heart	4171	Gln	Fractional shortening (%)	0.00677892	0.00815625	0.831132	0.000165667	0.405946	0.535111	9.1181e-05	FALSE
LIFE-Heart	977	Gln	Left ventricular mass (g)	0.018445	0.0175908	1.04856	0.0011264	0.29464	0.440864	9.1181e-05	FALSE
LIFE-Heart	2491	Gln	Left ventricular function	-0.0540678	0.0113627	-4.75836	0.00901482	2.06336e-06	5.98375e-05	9.1181e-05	TRUE
LIFE-Heart	5347	Gln	Left ventricular internal diameter end diastole	-0.0227493	0.00717629	-3.17006	0.0018766	0.0015327	0.0111121	9.1181e-05	TRUE
LIFE-Heart	4182	Gln	Left ventricular internal diameter end systole	-0.0221003	0.00817083	-2.70478	0.00174714	0.00686266	0.0331695	9.1181e-05	TRUE
LIFE-Heart	4683	Gln	Back wall (M-mode, mm)	-0.0141235	0.00767384	-1.84048	0.000723119	0.065761	0.146698	9.1181e-05	FALSE
LIFE-Heart	1318	Gln	Pulmonary venous flow diastolic (cm/s)	-0.000420882	0.0139222	-0.0302311	6.94466e-07	0.975887	0.975887	9.1181e-05	FALSE
LIFE-Heart	1318	Gln	Pulmonary venous flow systolic (cm/s)	0.00839945	0.0139137	0.603681	0.000276846	0.54616	0.609178	9.1181e-05	FALSE
LIFE-Heart	5452	Gln	Septum (mm)	-0.00737783	0.00711219	-1.03735	0.00019741	0.299619	0.440864	9.1181e-05	FALSE
LIFE-Heart	2399	Gln	Tricuspid annular plane systolic excursion (mm)	0.0121474	0.0107161	1.13356	0.000535786	0.257091	0.438567	9.1181e-05	FALSE
LIFE-Heart	5855	Gln	NT-proBNP (pg/ml)	-0.026899	0.00630991	-4.26298	0.00309529	2.04892e-05	0.000297093	9.1181e-05	TRUE
LIFE-Adult	9622	Gln	NT-proBNP (pg/ml)	-0.0143314	0.00862524	-1.66157	0.000286903	0.0966323	0.51263	0.51263	FALSE
LIFE-Heart	3040	Gln	Number of plaques	-0.0226719	0.00701868	-3.23022	0.00342286	0.00125012	0.0111121	9.1181e-05	TRUE
LIFE-Adult	9236	Gln	Number of plaques	-0.0053947	0.00533965	-1.01031	0.000110528	0.312374	0.562272	0.51263	FALSE
LIFE-Heart	3099	Gln	Peripheral artery disease	-0.0754736	0.0303912	-2.4834	0.00198741	0.013066	0.0499338	9.1181e-05	FALSE
LIFE-Adult	8722	Gln	Peripheral artery disease	0.00415991	0.0257012	0.161857	3.0043e-06	0.871422	0.871422	0.51263	FALSE
LIFE-Heart	5860	Gln	Main stem stenosis	0.0270828	0.026348	1.02789	0.000180329	0.304044	0.440864	9.1181e-05	FALSE
LIFE-Heart	5749	Gln	CAD score	0.0288566	0.0149463	1.93069	0.000648189	0.0535707	0.129462	9.1181e-05	FALSE
LIFE-Heart	5686	Gln	Valvular disease	-0.010224	0.0318919	-0.320582	1.80808e-05	0.748539	0.775272	9.1181e-05	FALSE
LIFE-Heart	3040	Gln	Any plaques	-0.056253	0.0197447	-2.84902	0.00266468	0.00441491	0.0256065	9.1181e-05	TRUE
LIFE-Adult	9236	Gln	Any plaques	-0.0126677	0.0113625	-1.11487	0.000134586	0.264935	0.562272	0.51263	FALSE
LIFE-Heart	3039	Glu	Ankle brachial index	-0.0711926	0.0109105	-6.52516	0.0138258	7.9299e-11	4.59934e-10	4.12194e-24	TRUE
LIFE-Adult	8685	Glu	Ankle brachial index	-0.0173501	0.00904845	-1.91746	0.000423252	0.0552122	0.0552122	1.41957e-30	FALSE
LIFE-Adult	8580	Glu	Brachial-ankle pulse wave velocity	0.0815679	0.0079879	10.2114	0.0120099	2.42785e-24	7.28354e-24	1.41957e-30	TRUE
LIFE-Adult	3935	Glu	Brachial-femoral pulse wave velocity	0.0512972	0.0118582	4.3259	0.00473551	1.55683e-05	2.00164e-05	1.41957e-30	TRUE
LIFE-Heart	5748	Glu	Number of vessel disease (50% stenosis)	0.0553621	0.00954477	5.80025	0.00582094	6.97448e-09	2.88943e-08	4.12194e-24	TRUE
LIFE-Adult	8200	Glu	carotid-femoral pulse wave velocity	0.0331897	0.00818854	4.05319	0.00199994	5.09911e-05	5.7365e-05	1.41957e-30	TRUE
LIFE-Heart	2970	Glu	Carotid intima media thickness	0.0568222	0.0142261	3.99421	0.0053465	6.64867e-05	0.000128541	4.12194e-24	TRUE
LIFE-Adult	9317	Glu	Carotid intima media thickness	0.0841864	0.00778089	10.8196	0.0124113	4.02667e-27	1.812e-26	1.41957e-30	TRUE
LIFE-Heart	4700	Glu	Aortic bulb (mm)	0.0329187	0.0110929	2.96754	0.00187097	0.00301704	0.00486078	4.12194e-24	TRUE
LIFE-Heart	1537	Glu	Deceleration time (ms)	-0.000476605	0.0196397	-0.0242674	3.83653e-07	0.980642	0.991517	4.12194e-24	FALSE
LIFE-Heart	971	Glu	End-diastolic volume (biplane, ml)	0.043863	0.0246334	1.78064	0.00326143	0.0752853	0.0873309	4.12194e-24	FALSE
LIFE-Heart	1134	Glu	Ejection Fraction (biplane, %)	-0.0590025	0.0226227	-2.60811	0.00597315	0.00922421	0.0133751	4.12194e-24	TRUE
LIFE-Heart	1317	Glu	Ejection Fraction (%)	-0.0202089	0.0208915	-0.967326	0.000711067	0.333559	0.358267	4.12194e-24	FALSE
LIFE-Heart	431	Glu	E point-septal separation (mm)	0.0492416	0.0364291	1.35171	0.00424096	0.177181	0.197624	4.12194e-24	FALSE
LIFE-Heart	977	Glu	End-systolic volume (biplane, ml)	0.0517944	0.0244125	2.12163	0.00459553	0.0341203	0.0449767	4.12194e-24	FALSE
LIFE-Heart	1111	Glu	Flow Propagation Velocity (cm/s)	0.000245074	0.023044	0.0106351	1.01988e-07	0.991517	0.991517	4.12194e-24	FALSE
LIFE-Heart	4171	Glu	Fractional shortening (%)	-0.0824394	0.0116982	-7.04721	0.0117722	2.12639e-12	2.05551e-11	4.12194e-24	TRUE
LIFE-Heart	977	Glu	Left ventricular mass (g)	0.0484395	0.0240191	2.01671	0.00415406	0.044	0.0554783	4.12194e-24	FALSE
LIFE-Heart	2490	Glu	Left ventricular function	0.0622073	0.015999	3.8882	0.00603971	0.000103634	0.000187836	4.12194e-24	TRUE
LIFE-Heart	5346	Glu	Left ventricular internal diameter end diastole	0.0588327	0.0103313	5.69461	0.00603162	1.30251e-08	4.72161e-08	4.12194e-24	TRUE
LIFE-Heart	4182	Glu	Left ventricular internal diameter end systole	0.0877184	0.0116399	7.53604	0.0134045	5.90466e-14	8.56175e-13	4.12194e-24	TRUE
LIFE-Heart	4682	Glu	Back wall (M-mode, mm)	0.0581501	0.011076	5.2501	0.00585516	1.58748e-07	4.6037e-07	4.12194e-24	TRUE
LIFE-Heart	1318	Glu	Pulmonary venous flow diastolic (cm/s)	0.0475883	0.02041	2.33162	0.00411404	0.0198711	0.0274411	4.12194e-24	TRUE
LIFE-Heart	1318	Glu	Pulmonary venous flow systolic (cm/s)	-0.0375224	0.020473	-1.83277	0.00254597	0.0670624	0.0810337	4.12194e-24	FALSE
LIFE-Heart	5451	Glu	Septum (mm)	0.0532541	0.0102415	5.19985	0.00493759	2.06733e-07	5.45023e-07	4.12194e-24	TRUE
LIFE-Heart	2398	Glu	Tricuspid annular plane systolic excursion (mm)	-0.0766681	0.0152279	-5.0347	0.0104686	5.14203e-07	1.14707e-06	4.12194e-24	TRUE
LIFE-Heart	5854	Glu	NT-proBNP (pg/ml)	0.0971651	0.00907346	10.7087	0.0192195	1.62864e-26	4.72305e-25	4.12194e-24	TRUE
LIFE-Adult	9623	Glu	NT-proBNP (pg/ml)	0.100934	0.0119541	8.44348	0.00735557	3.52592e-17	6.34665e-17	1.41957e-30	TRUE
LIFE-Heart	3040	Glu	Number of plaques	0.0566301	0.0103409	5.47632	0.00977516	4.69666e-08	1.51337e-07	4.12194e-24	TRUE
LIFE-Adult	9237	Glu	Number of plaques	0.0869689	0.0073465	11.8381	0.0149482	4.2278e-32	3.80502e-31	1.41957e-30	TRUE
LIFE-Heart	3099	Glu	Peripheral artery disease	0.271192	0.0446021	6.08027	0.0117964	1.3465e-09	6.5081e-09	4.12194e-24	TRUE
LIFE-Adult	8723	Glu	Peripheral artery disease	0.197767	0.0357397	5.53353	0.00349878	3.22934e-08	4.84401e-08	1.41957e-30	TRUE
LIFE-Heart	5859	Glu	Main stem stenosis	0.107039	0.0381716	2.80414	0.00134073	0.00506164	0.00772567	4.12194e-24	TRUE
LIFE-Heart	5748	Glu	CAD score	0.111043	0.0215844	5.1446	0.00458502	2.76991e-07	6.69395e-07	4.12194e-24	TRUE
LIFE-Heart	5685	Glu	Valvular disease	0.151895	0.0460767	3.29656	0.0019086	0.00098478	0.00167992	4.12194e-24	TRUE
LIFE-Heart	3040	Glu	Any plaques	0.137569	0.0291159	4.72487	0.00729477	2.40723e-06	4.98641e-06	4.12194e-24	TRUE
LIFE-Adult	9237	Glu	Any plaques	0.15054	0.0156731	9.60499	0.009891	9.62246e-22	2.16505e-21	1.41957e-30	TRUE
LIFE-Heart	3039	Gly	Ankle brachial index	-0.0344662	0.0116509	-2.95824	0.00287324	0.00311789	0.0178097	0.0114217	TRUE
LIFE-Adult	8685	Gly	Ankle brachial index	-0.029006	0.00922985	-3.14263	0.00113612	0.00168002	0.00756007	2.90485e-07	TRUE
LIFE-Adult	8580	Gly	Brachial-ankle pulse wave velocity	-0.00617346	0.00821502	-0.751485	6.58303e-05	0.452382	0.508929	2.90485e-07	FALSE
LIFE-Adult	3935	Gly	Brachial-femoral pulse wave velocity	0.00949266	0.0123169	0.770701	0.000151002	0.440931	0.508929	2.90485e-07	FALSE
LIFE-Heart	5749	Gly	Number of vessel disease (50% stenosis)	-0.0293771	0.0102544	-2.86483	0.00142605	0.00418751	0.0178097	0.0114217	TRUE
LIFE-Adult	8200	Gly	carotid-femoral pulse wave velocity	0.0157673	0.00836502	1.8849	0.000433194	0.0594782	0.178435	2.90485e-07	FALSE
LIFE-Heart	2970	Gly	Carotid intima media thickness	-0.00682522	0.0149674	-0.456006	7.00562e-05	0.648419	0.783506	0.0114217	FALSE
LIFE-Adult	9315	Gly	Carotid intima media thickness	0.0119832	0.00796902	1.50373	0.000242741	0.132685	0.298542	2.90485e-07	FALSE
LIFE-Heart	4701	Gly	Aortic bulb (mm)	-0.0164217	0.0117869	-1.39322	0.00041291	0.163619	0.364995	0.0114217	FALSE
LIFE-Heart	1537	Gly	Deceleration time (ms)	-0.0170449	0.0211024	-0.807722	0.000424845	0.419376	0.579138	0.0114217	FALSE
LIFE-Heart	971	Gly	End-diastolic volume (biplane, ml)	-0.0578978	0.0246866	-2.34531	0.00564442	0.0192121	0.0619057	0.0114217	FALSE
LIFE-Heart	1134	Gly	Ejection Fraction (biplane, %)	-0.0233132	0.0231158	-1.00854	0.000897743	0.31341	0.478362	0.0114217	FALSE
LIFE-Heart	1317	Gly	Ejection Fraction (%)	0.00123451	0.0222683	0.0554379	2.33715e-06	0.955798	0.999635	0.0114217	FALSE
LIFE-Heart	431	Gly	E point-septal separation (mm)	-8.0205e-06	0.0333989	-0.000240143	1.34426e-10	0.999809	0.999809	0.0114217	FALSE
LIFE-Heart	977	Gly	End-systolic volume (biplane, ml)	-0.01356	0.0247576	-0.547709	0.000307582	0.584017	0.73637	0.0114217	FALSE
LIFE-Heart	1111	Gly	Flow Propagation Velocity (cm/s)	-0.0101791	0.0251455	-0.404807	0.000147741	0.685697	0.795409	0.0114217	FALSE
LIFE-Heart	4171	Gly	Fractional shortening (%)	-0.0164121	0.0125875	-1.30383	0.000407601	0.192362	0.368038	0.0114217	FALSE
LIFE-Heart	977	Gly	Left ventricular mass (g)	-0.0884481	0.0245362	-3.6048	0.0131525	0.000328209	0.00951806	0.0114217	TRUE
LIFE-Heart	2491	Gly	Left ventricular function	-0.0228453	0.0175205	-1.30392	0.000682622	0.192381	0.368038	0.0114217	FALSE
LIFE-Heart	5347	Gly	Left ventricular internal diameter end diastole	-0.000485264	0.0111108	-0.043675	3.56876e-07	0.965165	0.999635	0.0114217	FALSE
LIFE-Heart	4182	Gly	Left ventricular internal diameter end systole	0.0119142	0.0125256	0.95119	0.000216404	0.341563	0.495266	0.0114217	FALSE
LIFE-Heart	4683	Gly	Back wall (M-mode, mm)	-0.0377339	0.0118528	-3.18355	0.00216046	0.00146433	0.0141551	0.0114217	TRUE
LIFE-Heart	1318	Gly	Pulmonary venous flow diastolic (cm/s)	0.0350941	0.0227515	1.54249	0.00180471	0.123194	0.297718	0.0114217	FALSE
LIFE-Heart	1318	Gly	Pulmonary venous flow systolic (cm/s)	-0.0290965	0.0228471	-1.27353	0.00123091	0.203055	0.368038	0.0114217	FALSE
LIFE-Heart	5452	Gly	Septum (mm)	-0.0367257	0.0109864	-3.34284	0.00204619	0.000834847	0.0121053	0.0114217	TRUE
LIFE-Heart	2399	Gly	Tricuspid annular plane systolic excursion (mm)	-0.0200349	0.0162179	-1.23536	0.000636274	0.216817	0.369864	0.0114217	FALSE
LIFE-Heart	5855	Gly	NT-proBNP (pg/ml)	-0.00684858	0.00981694	-0.697629	8.31446e-05	0.485437	0.639895	0.0114217	FALSE
LIFE-Adult	9621	Gly	NT-proBNP (pg/ml)	0.0679459	0.0121597	5.58779	0.00323551	2.36248e-08	2.12623e-07	2.90485e-07	TRUE
LIFE-Heart	3040	Gly	Number of plaques	-0.0327755	0.0108946	-3.00841	0.00297027	0.0026477	0.0178097	0.0114217	TRUE
LIFE-Adult	9235	Gly	Number of plaques	-0.00701305	0.00752863	-0.931517	9.39719e-05	0.351611	0.508929	2.90485e-07	FALSE
LIFE-Heart	3099	Gly	Peripheral artery disease	0.0738002	0.047487	1.55411	0.000779266	0.12026	0.297718	0.0114217	FALSE
LIFE-Adult	8723	Gly	Peripheral artery disease	0.0285002	0.036554	0.779675	6.96996e-05	0.435604	0.508929	2.90485e-07	FALSE
LIFE-Heart	5860	Gly	Main stem stenosis	0.0121511	0.0409369	0.296826	1.504e-05	0.76661	0.855065	0.0114217	FALSE
LIFE-Heart	5749	Gly	CAD score	-0.0412565	0.0231848	-1.77947	0.000550679	0.0752163	0.218127	0.0114217	FALSE
LIFE-Heart	5686	Gly	Valvular disease	0.0520446	0.0494811	1.05181	0.000194596	0.292932	0.471946	0.0114217	FALSE
LIFE-Heart	3040	Gly	Any plaques	-0.0875571	0.0306411	-2.85751	0.00268053	0.00429889	0.0178097	0.0114217	TRUE
LIFE-Adult	9235	Gly	Any plaques	0.00122887	0.0160226	0.0766957	6.37087e-07	0.938867	0.938867	2.90485e-07	FALSE
LIFE-Heart	3029	His	Ankle brachial index	0.00208533	0.0108307	0.192538	1.22466e-05	0.847333	0.913622	2.68195e-06	FALSE
LIFE-Adult	8682	His	Ankle brachial index	0.0125811	0.00744918	1.68892	0.000328516	0.0912704	0.410717	0.00234782	FALSE
LIFE-Adult	8577	His	Brachial-ankle pulse wave velocity	-0.000951947	0.00663187	-0.143541	2.40281e-06	0.885866	0.941356	0.00234782	FALSE
LIFE-Adult	3934	His	Brachial-femoral pulse wave velocity	-0.00392739	0.00983497	-0.399329	4.05538e-05	0.689672	0.88696	0.00234782	FALSE
LIFE-Heart	5739	His	Number of vessel disease (50% stenosis)	0.0121223	0.00941811	1.28713	0.000288692	0.198101	0.473438	2.68195e-06	FALSE
LIFE-Adult	8197	His	carotid-femoral pulse wave velocity	0.00270703	0.0067835	0.399062	1.94322e-05	0.689858	0.88696	0.00234782	FALSE
LIFE-Heart	2959	His	Carotid intima media thickness	0.00724398	0.0140189	0.51673	9.02893e-05	0.605384	0.731505	2.68195e-06	FALSE
LIFE-Adult	9313	His	Carotid intima media thickness	-0.00267328	0.0064437	-0.414868	1.84848e-05	0.678248	0.88696	0.00234782	FALSE
LIFE-Heart	4690	His	Aortic bulb (mm)	0.0280539	0.0109098	2.57144	0.00140848	0.0101583	0.0981973	2.68195e-06	FALSE
LIFE-Heart	1536	His	Deceleration time (ms)	0.0327493	0.0193287	1.69434	0.00186794	0.0904041	0.473438	2.68195e-06	FALSE
LIFE-Heart	962	His	End-diastolic volume (biplane, ml)	-0.021881	0.0248417	-0.880816	0.00080751	0.378638	0.686282	2.68195e-06	FALSE
LIFE-Heart	1124	His	Ejection Fraction (biplane, %)	0.0285658	0.0228862	1.24817	0.00138659	0.212231	0.473438	2.68195e-06	FALSE
LIFE-Heart	1307	His	Ejection Fraction (%)	0.0270167	0.0204822	1.31903	0.00133144	0.187389	0.473438	2.68195e-06	FALSE
LIFE-Heart	431	His	E point-septal separation (mm)	0.00107743	0.0352625	0.0305547	2.17619e-06	0.975639	0.975639	2.68195e-06	FALSE
LIFE-Heart	967	His	End-systolic volume (biplane, ml)	-0.03252	0.0248349	-1.30945	0.00177369	0.190695	0.473438	2.68195e-06	FALSE
LIFE-Heart	1110	His	Flow Propagation Velocity (cm/s)	-0.01645	0.0231084	-0.711862	0.000457144	0.4767	0.709509	2.68195e-06	FALSE
LIFE-Heart	4160	His	Fractional shortening (%)	0.00218735	0.0116134	0.188347	8.5316e-06	0.850614	0.913622	2.68195e-06	FALSE
LIFE-Heart	967	His	Left ventricular mass (g)	-0.0199475	0.0246267	-0.809996	0.000679428	0.418142	0.699058	2.68195e-06	FALSE
LIFE-Heart	2491	His	Left ventricular function	-0.0244822	0.0159347	-1.53641	0.000947501	0.124564	0.473438	2.68195e-06	FALSE
LIFE-Heart	5336	His	Left ventricular internal diameter end diastole	-0.00622839	0.0102468	-0.607835	6.92609e-05	0.543323	0.709509	2.68195e-06	FALSE
LIFE-Heart	4171	His	Left ventricular internal diameter end systole	-0.00672798	0.0115966	-0.580168	8.07309e-05	0.561833	0.709509	2.68195e-06	FALSE
LIFE-Heart	4672	His	Back wall (M-mode, mm)	0.0136961	0.0109587	1.2498	0.000334363	0.211436	0.473438	2.68195e-06	FALSE
LIFE-Heart	1317	His	Pulmonary venous flow diastolic (cm/s)	0.0225297	0.0208474	1.0807	0.000887351	0.280031	0.580064	2.68195e-06	FALSE
LIFE-Heart	1317	His	Pulmonary venous flow systolic (cm/s)	0.0212032	0.0209199	1.01354	0.000780585	0.310987	0.601241	2.68195e-06	FALSE
LIFE-Heart	5441	His	Septum (mm)	0.00672962	0.0101416	0.663563	8.09487e-05	0.506998	0.709509	2.68195e-06	FALSE
LIFE-Heart	2390	His	Tricuspid annular plane systolic excursion (mm)	0.0119963	0.0153274	0.782671	0.000256456	0.433898	0.699058	2.68195e-06	FALSE
LIFE-Heart	5844	His	NT-proBNP (pg/ml)	-0.0488576	0.00897308	-5.44491	0.00504918	5.39472e-08	1.56447e-06	2.68195e-06	TRUE
LIFE-Adult	9619	His	NT-proBNP (pg/ml)	-0.0362501	0.009849	-3.68058	0.00140664	0.000233975	0.00210578	0.00234782	TRUE
LIFE-Heart	3029	His	Number of plaques	-0.0145459	0.0101724	-1.42994	0.000675042	0.152837	0.473438	2.68195e-06	FALSE
LIFE-Adult	9233	His	Number of plaques	-0.00305592	0.00608	-0.502619	2.73663e-05	0.615244	0.88696	0.00234782	FALSE
LIFE-Heart	3088	His	Peripheral artery disease	-0.00260605	0.0442059	-0.0589525	1.12618e-06	0.952994	0.975639	2.68195e-06	FALSE
LIFE-Adult	8720	His	Peripheral artery disease	0.0302877	0.0294963	1.02683	0.000120928	0.30453	0.88696	0.00234782	FALSE
LIFE-Heart	5849	His	Main stem stenosis	0.0519078	0.0374999	1.38421	0.000327589	0.166347	0.473438	2.68195e-06	FALSE
LIFE-Heart	5739	His	CAD score	0.045598	0.0212896	2.1418	0.000798963	0.0322514	0.233823	2.68195e-06	FALSE
LIFE-Heart	5675	His	Valvular disease	-0.181069	0.0453689	-3.99103	0.00279989	6.66153e-05	0.000965922	2.68195e-06	TRUE
LIFE-Heart	3029	His	Any plaques	-0.0092697	0.028625	-0.323832	3.46428e-05	0.746087	0.865461	2.68195e-06	FALSE
LIFE-Adult	9233	His	Any plaques	0.000951915	0.0129393	0.0735678	5.86308e-07	0.941356	0.941356	0.00234782	FALSE
LIFE-Heart	3039	Leu|Ile	Ankle brachial index	0.0195632	0.011444	1.70948	0.000961315	0.0874641	0.120784	3.10118e-19	FALSE
LIFE-Adult	8685	Leu|Ile	Ankle brachial index	0.0607734	0.011035	5.50736	0.00348099	3.74661e-08	5.61991e-08	1.4846e-72	TRUE
LIFE-Adult	8580	Leu|Ile	Brachial-ankle pulse wave velocity	0.118964	0.00974819	12.2037	0.0170657	5.6742e-34	2.55339e-33	1.4846e-72	TRUE
LIFE-Adult	3935	Leu|Ile	Brachial-femoral pulse wave velocity	-0.0110277	0.0147851	-0.745865	0.000141428	0.455794	0.512768	1.4846e-72	FALSE
LIFE-Heart	5749	Leu|Ile	Number of vessel disease (50% stenosis)	0.0947198	0.00992594	9.54265	0.015598	2.00507e-21	5.8147e-20	3.10118e-19	TRUE
LIFE-Adult	8200	Leu|Ile	carotid-femoral pulse wave velocity	0.0028933	0.0100177	0.28882	1.01752e-05	0.772727	0.772727	1.4846e-72	FALSE
LIFE-Heart	2970	Leu|Ile	Carotid intima media thickness	0.0781554	0.0147808	5.28763	0.00933226	1.32902e-07	4.28238e-07	3.10118e-19	TRUE
LIFE-Adult	9317	Leu|Ile	Carotid intima media thickness	0.0924634	0.00950902	9.72376	0.0100485	3.04585e-22	9.10376e-22	1.4846e-72	TRUE
LIFE-Heart	4701	Leu|Ile	Aortic bulb (mm)	0.0928909	0.0115073	8.07233	0.0136777	8.68612e-16	1.25949e-14	3.10118e-19	TRUE
LIFE-Heart	1537	Leu|Ile	Deceleration time (ms)	0.0511307	0.0205177	2.49202	0.00402942	0.0128065	0.0206328	3.10118e-19	TRUE
LIFE-Heart	971	Leu|Ile	End-diastolic volume (biplane, ml)	0.115259	0.024733	4.66012	0.0219202	3.6018e-06	8.70435e-06	3.10118e-19	TRUE
LIFE-Heart	1134	Leu|Ile	Ejection Fraction (biplane, %)	-0.0163666	0.0228288	-0.716929	0.000453846	0.473566	0.589596	3.10118e-19	FALSE
LIFE-Heart	1317	Leu|Ile	Ejection Fraction (%)	0.00900926	0.0215373	0.418309	0.000133049	0.675789	0.753765	3.10118e-19	FALSE
LIFE-Heart	431	Leu|Ile	E point-septal separation (mm)	0.0262378	0.0377966	0.694186	0.00112204	0.487941	0.589596	3.10118e-19	FALSE
LIFE-Heart	977	Leu|Ile	End-systolic volume (biplane, ml)	0.073724	0.024621	2.99435	0.00911225	0.00281973	0.00584086	3.10118e-19	TRUE
LIFE-Heart	1111	Leu|Ile	Flow Propagation Velocity (cm/s)	-0.0548239	0.0246156	-2.2272	0.00445297	0.0261338	0.0398885	3.10118e-19	TRUE
LIFE-Heart	4171	Leu|Ile	Fractional shortening (%)	-0.0267457	0.0122591	-2.1817	0.00114042	0.0291873	0.0423216	3.10118e-19	TRUE
LIFE-Heart	977	Leu|Ile	Left ventricular mass (g)	0.149023	0.0241273	6.17655	0.0376546	9.60665e-10	3.48241e-09	3.10118e-19	TRUE
LIFE-Heart	2491	Leu|Ile	Left ventricular function	-0.00587138	0.0171975	-0.34141	4.68281e-05	0.732824	0.787107	3.10118e-19	FALSE
LIFE-Heart	5347	Leu|Ile	Left ventricular internal diameter end diastole	0.0753035	0.0108058	6.96878	0.00900405	3.58352e-12	1.4846e-11	3.10118e-19	TRUE
LIFE-Heart	4182	Leu|Ile	Left ventricular internal diameter end systole	0.0599851	0.0122494	4.89697	0.00570419	1.01002e-06	2.92906e-06	3.10118e-19	TRUE
LIFE-Heart	4683	Leu|Ile	Back wall (M-mode, mm)	0.0887683	0.0114841	7.72965	0.012603	1.3111e-14	1.2674e-13	3.10118e-19	TRUE
LIFE-Heart	1318	Leu|Ile	Pulmonary venous flow diastolic (cm/s)	-0.0112509	0.0219828	-0.511807	0.000199008	0.608872	0.706291	3.10118e-19	FALSE
LIFE-Heart	1318	Leu|Ile	Pulmonary venous flow systolic (cm/s)	-0.00251814	0.0219782	-0.114574	9.97504e-06	0.9088	0.9088	3.10118e-19	FALSE
LIFE-Heart	5452	Leu|Ile	Septum (mm)	0.0789052	0.0106987	7.37524	0.00988196	1.88653e-13	1.09419e-12	3.10118e-19	TRUE
LIFE-Heart	2399	Leu|Ile	Tricuspid annular plane systolic excursion (mm)	0.024692	0.0162942	1.51539	0.000957113	0.129806	0.171108	3.10118e-19	FALSE
LIFE-Heart	5855	Leu|Ile	NT-proBNP (pg/ml)	-0.0423763	0.00955213	-4.43632	0.00335126	9.31881e-06	2.07881e-05	3.10118e-19	TRUE
LIFE-Adult	9622	Leu|Ile	NT-proBNP (pg/ml)	-0.266023	0.014389	-18.4879	0.0343115	5.1017e-75	4.59153e-74	1.4846e-72	TRUE
LIFE-Heart	3040	Leu|Ile	Number of plaques	0.0318126	0.0107274	2.96555	0.00288648	0.00304491	0.00588683	3.10118e-19	TRUE
LIFE-Adult	9237	Leu|Ile	Number of plaques	0.0871613	0.00899058	9.69473	0.0100748	4.04612e-22	9.10376e-22	1.4846e-72	TRUE
LIFE-Heart	3099	Leu|Ile	Peripheral artery disease	0.0113891	0.0467227	0.243759	1.91854e-05	0.807434	0.836271	3.10118e-19	FALSE
LIFE-Adult	8723	Leu|Ile	Peripheral artery disease	0.0673507	0.0437596	1.53911	0.000271552	0.123814	0.15919	1.4846e-72	FALSE
LIFE-Heart	5860	Leu|Ile	Main stem stenosis	0.192178	0.0398175	4.82647	0.00396084	1.42497e-06	3.75674e-06	3.10118e-19	TRUE
LIFE-Heart	5749	Leu|Ile	CAD score	0.170108	0.0224977	7.56113	0.00984993	4.62477e-14	3.35296e-13	3.10118e-19	TRUE
LIFE-Heart	5686	Leu|Ile	Valvular disease	-0.140643	0.0484387	-2.90352	0.00148099	0.00370414	0.00671375	3.10118e-19	TRUE
LIFE-Heart	3040	Leu|Ile	Any plaques	0.0865328	0.0301692	2.86825	0.00270067	0.00415594	0.00708955	3.10118e-19	TRUE
LIFE-Adult	9237	Leu|Ile	Any plaques	0.164134	0.0191526	8.5698	0.00788977	1.20343e-17	2.16618e-17	1.4846e-72	TRUE
LIFE-Heart	3039	Lys	Ankle brachial index	0.00545761	0.00767034	0.71152	0.00016667	0.476816	0.600685	1.13323e-11	FALSE
LIFE-Adult	8685	Lys	Ankle brachial index	-0.0056675	0.00610365	-0.928543	9.92866e-05	0.353152	0.408356	3.8519e-07	FALSE
LIFE-Adult	8580	Lys	Brachial-ankle pulse wave velocity	0.023774	0.00541309	4.39195	0.00224364	1.13688e-05	5.11596e-05	3.8519e-07	TRUE
LIFE-Adult	3935	Lys	Brachial-femoral pulse wave velocity	0.00749643	0.00823963	0.909801	0.000210415	0.362983	0.408356	3.8519e-07	FALSE
LIFE-Heart	5749	Lys	Number of vessel disease (50% stenosis)	-0.00979351	0.00683178	-1.43352	0.000357447	0.151763	0.275071	1.13323e-11	FALSE
LIFE-Adult	8200	Lys	carotid-femoral pulse wave velocity	0.00609134	0.00554808	1.09792	0.000147017	0.272272	0.408356	3.8519e-07	FALSE
LIFE-Heart	2970	Lys	Carotid intima media thickness	0.00516089	0.00992075	0.520212	9.1171e-05	0.602955	0.699428	1.13323e-11	FALSE
LIFE-Adult	9317	Lys	Carotid intima media thickness	0.0290181	0.00524162	5.5361	0.00327942	3.17683e-08	2.85915e-07	3.8519e-07	TRUE
LIFE-Heart	4701	Lys	Aortic bulb (mm)	0.0104663	0.00788551	1.32728	0.000374764	0.18448	0.297218	1.13323e-11	FALSE
LIFE-Heart	1537	Lys	Deceleration time (ms)	0.0212365	0.0136302	1.55805	0.00157895	0.119427	0.240383	1.13323e-11	FALSE
LIFE-Heart	971	Lys	End-diastolic volume (biplane, ml)	-0.0297683	0.0172857	-1.72214	0.00305131	0.0853633	0.190426	1.13323e-11	FALSE
LIFE-Heart	1134	Lys	Ejection Fraction (biplane, %)	0.0366837	0.0159873	2.29455	0.00462948	0.0219414	0.10605	1.13323e-11	FALSE
LIFE-Heart	1317	Lys	Ejection Fraction (%)	0.0453404	0.0147107	3.08215	0.00717224	0.00209785	0.0152094	1.13323e-11	TRUE
LIFE-Heart	431	Lys	E point-septal separation (mm)	0.00863368	0.0234508	0.368162	0.000315852	0.712934	0.765744	1.13323e-11	FALSE
LIFE-Heart	977	Lys	End-systolic volume (biplane, ml)	-0.030662	0.0171684	-1.78595	0.00326075	0.0744174	0.187418	1.13323e-11	FALSE
LIFE-Heart	1111	Lys	Flow Propagation Velocity (cm/s)	-0.0191513	0.0161818	-1.18351	0.00126142	0.236862	0.361526	1.13323e-11	FALSE
LIFE-Heart	4171	Lys	Fractional shortening (%)	0.0293527	0.0083265	3.52522	0.00297199	0.000427686	0.0041343	1.13323e-11	TRUE
LIFE-Heart	977	Lys	Left ventricular mass (g)	-0.0355282	0.0170479	-2.08403	0.00443478	0.0374176	0.155016	1.13323e-11	FALSE
LIFE-Heart	2491	Lys	Left ventricular function	-0.0534633	0.0118346	-4.51754	0.00813265	6.54836e-06	9.49512e-05	1.13323e-11	TRUE
LIFE-Heart	5347	Lys	Left ventricular internal diameter end diastole	-0.010053	0.00741432	-1.35589	0.000343836	0.175192	0.297218	1.13323e-11	FALSE
LIFE-Heart	4182	Lys	Left ventricular internal diameter end systole	-0.0193268	0.00834663	-2.31552	0.00128104	0.0206327	0.10605	1.13323e-11	FALSE
LIFE-Heart	4683	Lys	Back wall (M-mode, mm)	-0.00536579	0.00790152	-0.679083	9.85064e-05	0.497119	0.600685	1.13323e-11	FALSE
LIFE-Heart	1318	Lys	Pulmonary venous flow diastolic (cm/s)	-0.0069437	0.0146492	-0.473999	0.000170696	0.635579	0.708916	1.13323e-11	FALSE
LIFE-Heart	1318	Lys	Pulmonary venous flow systolic (cm/s)	-0.000369369	0.0146384	-0.0252329	4.83814e-07	0.979873	0.979873	1.13323e-11	FALSE
LIFE-Heart	5452	Lys	Septum (mm)	-0.0129645	0.00734364	-1.7654	0.000571535	0.0775521	0.187418	1.13323e-11	FALSE
LIFE-Heart	2399	Lys	Tricuspid annular plane systolic excursion (mm)	0.0108873	0.0111082	0.980106	0.000400594	0.327133	0.474342	1.13323e-11	FALSE
LIFE-Heart	5855	Lys	NT-proBNP (pg/ml)	-0.0483286	0.0065064	-7.42785	0.00933842	1.26185e-13	3.65937e-12	1.13323e-11	TRUE
LIFE-Adult	9623	Lys	NT-proBNP (pg/ml)	0.0148411	0.00803723	1.84655	0.000354279	0.0648438	0.116719	3.8519e-07	FALSE
LIFE-Heart	3040	Lys	Number of plaques	-0.00657279	0.00719721	-0.913242	0.000274451	0.361188	0.498783	1.13323e-11	FALSE
LIFE-Adult	9237	Lys	Number of plaques	0.0176156	0.00495456	3.55543	0.00136695	0.000379247	0.000853305	3.8519e-07	TRUE
LIFE-Heart	3099	Lys	Peripheral artery disease	-0.0559347	0.031281	-1.78814	0.00103136	0.0738516	0.187418	1.13323e-11	FALSE
LIFE-Adult	8723	Lys	Peripheral artery disease	0.0187827	0.0241482	0.77781	6.93666e-05	0.436702	0.436702	3.8519e-07	FALSE
LIFE-Heart	5860	Lys	Main stem stenosis	0.0501869	0.027248	1.84186	0.000578777	0.0655464	0.187418	1.13323e-11	FALSE
LIFE-Heart	5749	Lys	CAD score	-0.0283309	0.0154378	-1.83516	0.00058567	0.0665334	0.187418	1.13323e-11	FALSE
LIFE-Heart	5686	Lys	Valvular disease	-0.00435821	0.0329872	-0.132118	3.07093e-06	0.894896	0.926856	1.13323e-11	FALSE
LIFE-Heart	3040	Lys	Any plaques	-0.0163028	0.0202398	-0.805484	0.000213517	0.420604	0.554432	1.13323e-11	FALSE
LIFE-Adult	9237	Lys	Any plaques	0.0427758	0.0105409	4.05808	0.00178005	4.98845e-05	0.000149654	3.8519e-07	TRUE
LIFE-Heart	3039	MeHis	Ankle brachial index	-0.0811221	0.0125022	-6.4886	0.0136735	1.00797e-10	4.17586e-10	2.00958e-53	TRUE
LIFE-Adult	8682	MeHis	Ankle brachial index	-0.044085	0.00990908	-4.44895	0.00227513	8.73667e-06	8.73667e-06	2.34012e-54	TRUE
LIFE-Adult	8577	MeHis	Brachial-ankle pulse wave velocity	0.134901	0.00871112	15.4861	0.0272064	2.2646e-53	1.01907e-52	2.34012e-54	TRUE
LIFE-Adult	3933	MeHis	Brachial-femoral pulse wave velocity	0.0848083	0.0131244	6.4619	0.0105106	1.16034e-10	1.49186e-10	2.34012e-54	TRUE
LIFE-Heart	5747	MeHis	Number of vessel disease (50% stenosis)	0.0696676	0.0110339	6.31398	0.00689149	2.92331e-10	1.0597e-09	2.00958e-53	TRUE
LIFE-Adult	8198	MeHis	carotid-femoral pulse wave velocity	0.0460342	0.00896798	5.13317	0.00320461	2.91444e-07	3.27875e-07	2.34012e-54	TRUE
LIFE-Heart	2970	MeHis	Carotid intima media thickness	0.098391	0.0162686	6.04791	0.0121738	1.65084e-09	5.31937e-09	2.00958e-53	TRUE
LIFE-Adult	9314	MeHis	Carotid intima media thickness	0.130266	0.00849025	15.343	0.0246567	1.72563e-52	3.88267e-52	2.34012e-54	TRUE
LIFE-Heart	4700	MeHis	Aortic bulb (mm)	0.0525151	0.0129164	4.06578	0.0035063	4.8656e-05	7.83902e-05	2.00958e-53	TRUE
LIFE-Heart	1537	MeHis	Deceleration time (ms)	0.0382665	0.0227137	1.68473	0.00184566	0.0922435	0.107002	2.00958e-53	FALSE
LIFE-Heart	971	MeHis	End-diastolic volume (biplane, ml)	0.0174956	0.0285972	0.611796	0.000386119	0.540816	0.580877	2.00958e-53	FALSE
LIFE-Heart	1134	MeHis	Ejection Fraction (biplane, %)	-0.0485303	0.0264314	-1.83608	0.00296925	0.0666074	0.0804839	2.00958e-53	FALSE
LIFE-Heart	1317	MeHis	Ejection Fraction (%)	-0.0862436	0.0238609	-3.61444	0.00983698	0.000312368	0.000452933	2.00958e-53	TRUE
LIFE-Heart	431	MeHis	E point-septal separation (mm)	-0.0160288	0.0406132	-0.394669	0.000362954	0.693283	0.718043	2.00958e-53	FALSE
LIFE-Heart	977	MeHis	End-systolic volume (biplane, ml)	0.0311763	0.0284776	1.09477	0.00122773	0.273889	0.305492	2.00958e-53	FALSE
LIFE-Heart	1111	MeHis	Flow Propagation Velocity (cm/s)	0.00119279	0.0269231	0.0443037	1.7699e-06	0.96467	0.96467	2.00958e-53	FALSE
LIFE-Heart	4170	MeHis	Fractional shortening (%)	-0.0893047	0.0135631	-6.58436	0.0102945	5.13588e-11	2.48234e-10	2.00958e-53	TRUE
LIFE-Heart	977	MeHis	Left ventricular mass (g)	0.112127	0.0281712	3.9802	0.0159884	7.39637e-05	0.000112892	2.00958e-53	TRUE
LIFE-Heart	2490	MeHis	Left ventricular function	0.104912	0.0188834	5.55579	0.0122542	3.05746e-08	6.82049e-08	2.00958e-53	TRUE
LIFE-Heart	5346	MeHis	Left ventricular internal diameter end diastole	0.0724594	0.0120737	6.00145	0.00669465	2.08438e-09	6.0447e-09	2.00958e-53	TRUE
LIFE-Heart	4181	MeHis	Left ventricular internal diameter end systole	0.100541	0.0135562	7.41657	0.0129914	1.44747e-13	8.39532e-13	2.00958e-53	TRUE
LIFE-Heart	4682	MeHis	Back wall (M-mode, mm)	0.104941	0.0128628	8.1585	0.014023	4.31866e-16	3.13103e-15	2.00958e-53	TRUE
LIFE-Heart	1318	MeHis	Pulmonary venous flow diastolic (cm/s)	0.0827398	0.0239136	3.45995	0.00901471	0.000557544	0.000769942	2.00958e-53	TRUE
LIFE-Heart	1318	MeHis	Pulmonary venous flow systolic (cm/s)	-0.0596359	0.0239423	-2.49082	0.00469231	0.0128673	0.0169615	2.00958e-53	TRUE
LIFE-Heart	5451	MeHis	Septum (mm)	0.10234	0.011887	8.6094	0.0134203	9.49184e-18	9.17544e-17	2.00958e-53	TRUE
LIFE-Heart	2398	MeHis	Tricuspid annular plane systolic excursion (mm)	-0.0756316	0.0181245	-4.17288	0.00721507	3.11496e-05	5.31375e-05	2.00958e-53	TRUE
LIFE-Heart	5853	MeHis	NT-proBNP (pg/ml)	0.166999	0.0103948	16.0656	0.0422489	7.2183e-57	2.09331e-55	2.00958e-53	TRUE
LIFE-Adult	9620	MeHis	NT-proBNP (pg/ml)	0.207031	0.0130101	15.9131	0.0256529	2.68055e-56	2.41249e-55	2.34012e-54	TRUE
LIFE-Heart	3040	MeHis	Number of plaques	0.0660942	0.0118604	5.57266	0.0101186	2.72814e-08	6.59301e-08	2.00958e-53	TRUE
LIFE-Adult	9234	MeHis	Number of plaques	0.123499	0.00801441	15.4097	0.0250762	6.40416e-53	1.92125e-52	2.34012e-54	TRUE
LIFE-Heart	3099	MeHis	Peripheral artery disease	0.294997	0.0513305	5.74701	0.010552	9.96546e-09	2.62726e-08	2.00958e-53	TRUE
LIFE-Adult	8720	MeHis	Peripheral artery disease	0.263341	0.0392188	6.71465	0.00514506	2.00301e-11	3.00451e-11	2.34012e-54	TRUE
LIFE-Heart	5858	MeHis	Main stem stenosis	0.244109	0.0442308	5.51899	0.00517446	3.55592e-08	7.36583e-08	2.00958e-53	TRUE
LIFE-Heart	5747	MeHis	CAD score	0.0594646	0.0250012	2.37847	0.000983733	0.0174172	0.0219609	2.00958e-53	TRUE
LIFE-Heart	5685	MeHis	Valvular disease	0.473114	0.0532756	8.8805	0.0136871	8.78897e-19	1.2744e-17	2.00958e-53	TRUE
LIFE-Heart	3040	MeHis	Any plaques	0.14916	0.0334132	4.4641	0.0065169	8.33315e-06	1.51038e-05	2.00958e-53	TRUE
LIFE-Adult	9234	MeHis	Any plaques	0.251435	0.0170666	14.7326	0.0229706	1.41395e-48	2.54511e-48	2.34012e-54	TRUE
LIFE-Heart	2826	Met	Ankle brachial index	0.0259361	0.0128264	2.02209	0.0014458	0.0432614	0.139398	0.0131133	FALSE
LIFE-Adult	7174	Met	Ankle brachial index	0.0203942	0.0119179	1.71122	0.000408128	0.0870829	0.130624	2.83461e-10	FALSE
LIFE-Adult	7084	Met	Brachial-ankle pulse wave velocity	0.0208696	0.0106815	1.95382	0.000538738	0.0507622	0.114215	2.83461e-10	FALSE
LIFE-Adult	3759	Met	Brachial-femoral pulse wave velocity	-0.0390203	0.013978	-2.79155	0.00206991	0.0052721	0.0237244	2.83461e-10	TRUE
LIFE-Heart	5134	Met	Number of vessel disease (50% stenosis)	0.0365185	0.0118949	3.07009	0.00183324	0.00215111	0.031191	0.0131133	TRUE
LIFE-Adult	6764	Met	carotid-femoral pulse wave velocity	-0.0282353	0.0115489	-2.44485	0.000883173	0.0145165	0.0435496	2.83461e-10	TRUE
LIFE-Heart	2775	Met	Carotid intima media thickness	0.0180308	0.0166967	1.0799	0.000420376	0.280279	0.541873	0.0131133	FALSE
LIFE-Adult	7717	Met	Carotid intima media thickness	0.018408	0.0102739	1.79171	0.000415931	0.0732179	0.130624	2.83461e-10	FALSE
LIFE-Heart	4251	Met	Aortic bulb (mm)	0.0302643	0.0136571	2.216	0.00115439	0.026744	0.096947	0.0131133	FALSE
LIFE-Heart	1479	Met	Deceleration time (ms)	0.0204217	0.0227712	0.89682	0.000544244	0.369961	0.670554	0.0131133	FALSE
LIFE-Heart	819	Met	End-diastolic volume (biplane, ml)	0.0324593	0.0300299	1.0809	0.00142801	0.28006	0.541873	0.0131133	FALSE
LIFE-Heart	948	Met	Ejection Fraction (biplane, %)	0.00617905	0.0288411	0.214245	4.85185e-05	0.830402	0.963267	0.0131133	FALSE
LIFE-Heart	1106	Met	Ejection Fraction (%)	0.0331074	0.0270225	1.22518	0.00135781	0.220769	0.533525	0.0131133	FALSE
LIFE-Heart	307	Met	E point-septal separation (mm)	0.0281823	0.046705	0.603412	0.00119237	0.546683	0.772078	0.0131133	FALSE
LIFE-Heart	822	Met	End-systolic volume (biplane, ml)	0.02069	0.0295477	0.700222	0.000597583	0.483987	0.772078	0.0131133	FALSE
LIFE-Heart	1066	Met	Flow Propagation Velocity (cm/s)	-0.00395343	0.0261135	-0.151394	2.1541e-05	0.879694	0.981197	0.0131133	FALSE
LIFE-Heart	3743	Met	Fractional shortening (%)	-0.0187306	0.0142859	-1.31113	0.000459306	0.189895	0.507622	0.0131133	FALSE
LIFE-Heart	831	Met	Left ventricular mass (g)	0.016824	0.0308544	0.54527	0.00035852	0.585714	0.772078	0.0131133	FALSE
LIFE-Heart	2114	Met	Left ventricular function	0.00615793	0.0217719	0.282838	3.7876e-05	0.777329	0.939272	0.0131133	FALSE
LIFE-Heart	4802	Met	Left ventricular internal diameter end diastole	0.0354122	0.0126845	2.79177	0.00162112	0.00526271	0.0351918	0.0131133	TRUE
LIFE-Heart	3743	Met	Left ventricular internal diameter end systole	0.0379758	0.0142653	2.66211	0.00189079	0.00779842	0.0376924	0.0131133	TRUE
LIFE-Heart	4221	Met	Back wall (M-mode, mm)	0.00868014	0.0136865	0.634213	9.53276e-05	0.525976	0.772078	0.0131133	FALSE
LIFE-Heart	1268	Met	Pulmonary venous flow diastolic (cm/s)	0.0153483	0.0244664	0.627321	0.00031075	0.530562	0.772078	0.0131133	FALSE
LIFE-Heart	1268	Met	Pulmonary venous flow systolic (cm/s)	0.000150064	0.0243948	0.00615147	2.98899e-08	0.995093	0.995093	0.0131133	FALSE
LIFE-Heart	4893	Met	Septum (mm)	0.0150322	0.012813	1.1732	0.000281334	0.240774	0.53711	0.0131133	FALSE
LIFE-Heart	2025	Met	Tricuspid annular plane systolic excursion (mm)	-0.00936813	0.0203292	-0.460821	0.00010496	0.644976	0.813231	0.0131133	FALSE
LIFE-Heart	5231	Met	NT-proBNP (pg/ml)	-0.0256019	0.0113898	-2.24779	0.00096532	0.0246314	0.096947	0.0131133	FALSE
LIFE-Adult	7993	Met	NT-proBNP (pg/ml)	-0.105446	0.0156808	-6.72449	0.00562688	1.88325e-11	1.69492e-10	2.83461e-10	TRUE
LIFE-Heart	2830	Met	Number of plaques	0.00051912	0.0121728	0.0426458	6.43092e-07	0.965987	0.995093	0.0131133	FALSE
LIFE-Adult	7661	Met	Number of plaques	0.00828732	0.00961238	0.862151	9.70403e-05	0.388632	0.437211	2.83461e-10	FALSE
LIFE-Heart	2884	Met	Peripheral artery disease	-0.0686626	0.0526801	-1.30339	0.000589112	0.192546	0.507622	0.0131133	FALSE
LIFE-Adult	7205	Met	Peripheral artery disease	0.0246094	0.0458783	0.536405	3.99443e-05	0.591695	0.591695	2.83461e-10	FALSE
LIFE-Heart	5235	Met	Main stem stenosis	0.134537	0.0477227	2.81915	0.00151645	0.00483317	0.0351918	0.0131133	TRUE
LIFE-Heart	5134	Met	CAD score	0.09458	0.0266055	3.5549	0.00245641	0.000381529	0.0110643	0.0131133	TRUE
LIFE-Heart	5090	Met	Valvular disease	-0.0333702	0.0585289	-0.570149	6.38854e-05	0.568602	0.772078	0.0131133	FALSE
LIFE-Heart	2830	Met	Any plaques	0.00337533	0.0341306	0.0988944	3.4583e-06	0.921229	0.989468	0.0131133	FALSE
LIFE-Adult	7661	Met	Any plaques	0.0320431	0.0207307	1.54569	0.000311843	0.122221	0.157142	2.83461e-10	FALSE
LIFE-Heart	3039	OH-Prol	Ankle brachial index	0.0182641	0.0104548	1.74695	0.00100388	0.0807467	0.117083	1.421e-14	FALSE
LIFE-Adult	8685	OH-Prol	Ankle brachial index	0.0598607	0.00972186	6.15733	0.00434734	7.72635e-10	1.15895e-09	2.63015e-48	TRUE
LIFE-Adult	8580	OH-Prol	Brachial-ankle pulse wave velocity	0.0761416	0.00861359	8.83971	0.00902717	1.15057e-18	5.17757e-18	2.63015e-48	TRUE
LIFE-Adult	3935	OH-Prol	Brachial-femoral pulse wave velocity	-0.0128638	0.0128737	-0.999231	0.000253804	0.317744	0.357462	2.63015e-48	FALSE
LIFE-Heart	5749	OH-Prol	Number of vessel disease (50% stenosis)	0.0738811	0.00889514	8.30578	0.0118614	1.225e-16	3.55249e-15	1.421e-14	TRUE
LIFE-Adult	8200	OH-Prol	carotid-femoral pulse wave velocity	-0.0115682	0.00882973	-1.31014	0.000209334	0.190184	0.244522	2.63015e-48	FALSE
LIFE-Heart	2970	OH-Prol	Carotid intima media thickness	0.0654371	0.0135365	4.83411	0.00781203	1.40543e-06	4.52862e-06	1.421e-14	TRUE
LIFE-Adult	9317	OH-Prol	Carotid intima media thickness	0.0728912	0.00838592	8.69209	0.00804557	4.16085e-18	1.24826e-17	2.63015e-48	TRUE
LIFE-Heart	4701	OH-Prol	Aortic bulb (mm)	0.068184	0.0103332	6.59851	0.00918079	4.61216e-11	2.67506e-10	1.421e-14	TRUE
LIFE-Heart	1537	OH-Prol	Deceleration time (ms)	0.0408294	0.0191219	2.13522	0.00296135	0.0329008	0.0596327	1.421e-14	FALSE
LIFE-Heart	971	OH-Prol	End-diastolic volume (biplane, ml)	0.0866102	0.0224331	3.86082	0.0151498	0.0001205	0.000291209	1.421e-14	TRUE
LIFE-Heart	1134	OH-Prol	Ejection Fraction (biplane, %)	0.0156461	0.0206272	0.758519	0.000508002	0.448298	0.541694	1.421e-14	FALSE
LIFE-Heart	1317	OH-Prol	Ejection Fraction (%)	0.0207258	0.0191943	1.07979	0.000885864	0.280434	0.353591	1.421e-14	FALSE
LIFE-Heart	431	OH-Prol	E point-septal separation (mm)	0.00795322	0.0346085	0.229806	0.000123087	0.818352	0.878971	1.421e-14	FALSE
LIFE-Heart	977	OH-Prol	End-systolic volume (biplane, ml)	0.0399577	0.0223768	1.78568	0.00325974	0.0744625	0.113653	1.421e-14	FALSE
LIFE-Heart	1111	OH-Prol	Flow Propagation Velocity (cm/s)	-0.0471868	0.0230991	-2.04279	0.00374875	0.041309	0.0665533	1.421e-14	FALSE
LIFE-Heart	4171	OH-Prol	Fractional shortening (%)	-0.0229281	0.011026	-2.07946	0.00103615	0.0376356	0.064202	1.421e-14	FALSE
LIFE-Heart	977	OH-Prol	Left ventricular mass (g)	0.116621	0.0219922	5.30284	0.0280326	1.41077e-07	5.11404e-07	1.421e-14	TRUE
LIFE-Heart	2491	OH-Prol	Left ventricular function	0.00728513	0.0148712	0.489883	9.64091e-05	0.62426	0.724141	1.421e-14	FALSE
LIFE-Heart	5347	OH-Prol	Left ventricular internal diameter end diastole	0.0641507	0.00966939	6.6344	0.0081676	3.57996e-11	2.59547e-10	1.421e-14	TRUE
LIFE-Heart	4182	OH-Prol	Left ventricular internal diameter end systole	0.0513979	0.0110154	4.66598	0.00518148	3.16752e-06	9.1858e-06	1.421e-14	TRUE
LIFE-Heart	4683	OH-Prol	Back wall (M-mode, mm)	0.0668971	0.0103516	6.46249	0.00884308	1.13485e-10	5.48509e-10	1.421e-14	TRUE
LIFE-Heart	1318	OH-Prol	Pulmonary venous flow diastolic (cm/s)	0.00302005	0.0208438	0.14489	1.59519e-05	0.88482	0.888937	1.421e-14	FALSE
LIFE-Heart	1318	OH-Prol	Pulmonary venous flow systolic (cm/s)	0.00812848	0.0208376	0.390087	0.000115616	0.696535	0.776905	1.421e-14	FALSE
LIFE-Heart	5452	OH-Prol	Septum (mm)	0.0593516	0.00958885	6.18965	0.0069806	6.47027e-10	2.68054e-09	1.421e-14	TRUE
LIFE-Heart	2399	OH-Prol	Tricuspid annular plane systolic excursion (mm)	0.0179318	0.0143665	1.24817	0.000649525	0.212091	0.279575	1.421e-14	FALSE
LIFE-Heart	5855	OH-Prol	NT-proBNP (pg/ml)	-0.0238397	0.00855405	-2.78694	0.00132526	0.00533793	0.0110571	1.421e-14	TRUE
LIFE-Adult	9623	OH-Prol	NT-proBNP (pg/ml)	-0.191028	0.0127608	-14.97	0.0227626	4.21788e-50	3.79609e-49	2.63015e-48	TRUE
LIFE-Heart	3040	OH-Prol	Number of plaques	0.0263346	0.00981098	2.6842	0.00236599	0.00730987	0.0141324	1.421e-14	TRUE
LIFE-Adult	9237	OH-Prol	Number of plaques	0.0572546	0.00793817	7.21256	0.00560148	5.923e-13	1.33268e-12	2.63015e-48	TRUE
LIFE-Heart	3099	OH-Prol	Peripheral artery disease	0.00595953	0.0426715	0.139661	6.29802e-06	0.888937	0.888937	1.421e-14	FALSE
LIFE-Adult	8723	OH-Prol	Peripheral artery disease	0.0313384	0.0385635	0.812646	7.57187e-05	0.416443	0.416443	2.63015e-48	FALSE
LIFE-Heart	5860	OH-Prol	Main stem stenosis	0.15305	0.0356336	4.2951	0.00313929	1.77441e-05	4.67798e-05	1.421e-14	TRUE
LIFE-Heart	5749	OH-Prol	CAD score	0.146306	0.0201307	7.26779	0.00910731	4.14137e-13	6.00499e-12	1.421e-14	TRUE
LIFE-Heart	5686	OH-Prol	Valvular disease	-0.0660283	0.0433319	-1.52378	0.000408331	0.12762	0.176237	1.421e-14	FALSE
LIFE-Heart	3040	OH-Prol	Any plaques	0.0830107	0.027581	3.00971	0.00297281	0.0026365	0.00588143	1.421e-14	TRUE
LIFE-Adult	9237	OH-Prol	Any plaques	0.106098	0.0169035	6.27665	0.00424787	3.61499e-10	6.50698e-10	2.63015e-48	TRUE
LIFE-Heart	3038	Orn	Ankle brachial index	-0.0034167	0.0107436	-0.318022	3.33117e-05	0.75049	0.949856	0.00565189	FALSE
LIFE-Adult	8661	Orn	Ankle brachial index	-0.019737	0.00736992	-2.67805	0.000827582	0.00741913	0.00834652	3.68881e-31	TRUE
LIFE-Adult	8556	Orn	Brachial-ankle pulse wave velocity	0.0337184	0.00653972	5.15594	0.00309812	2.58018e-07	4.64432e-07	3.68881e-31	TRUE
LIFE-Adult	3913	Orn	Brachial-femoral pulse wave velocity	0.0268084	0.00954928	2.80737	0.00201112	0.00501946	0.0064536	3.68881e-31	TRUE
LIFE-Heart	5748	Orn	Number of vessel disease (50% stenosis)	0.000536779	0.00941749	0.0569981	5.65398e-07	0.954549	0.980454	0.00565189	FALSE
LIFE-Adult	8176	Orn	carotid-femoral pulse wave velocity	0.0200872	0.00668344	3.00552	0.00110389	0.00265928	0.00398892	3.68881e-31	TRUE
LIFE-Heart	2969	Orn	Carotid intima media thickness	0.0430653	0.0139802	3.08044	0.00318802	0.00208589	0.0151227	0.00565189	TRUE
LIFE-Adult	9292	Orn	Carotid intima media thickness	0.0756164	0.00632305	11.9588	0.015161	1.01411e-32	9.12695e-32	3.68881e-31	TRUE
LIFE-Heart	4700	Orn	Aortic bulb (mm)	0.00327425	0.0108858	0.300782	1.92567e-05	0.763594	0.949856	0.00565189	FALSE
LIFE-Heart	1537	Orn	Deceleration time (ms)	0.0451888	0.0194005	2.32926	0.00352204	0.0199747	0.0965443	0.00565189	FALSE
LIFE-Heart	970	Orn	End-diastolic volume (biplane, ml)	-0.0466082	0.0234718	-1.98571	0.00405688	0.0473471	0.152563	0.00565189	FALSE
LIFE-Heart	1133	Orn	Ejection Fraction (biplane, %)	0.0265876	0.021526	1.23514	0.00134705	0.217035	0.613465	0.00565189	FALSE
LIFE-Heart	1316	Orn	Ejection Fraction (%)	0.0732523	0.0208258	3.51738	0.00932765	0.00045069	0.00435667	0.00565189	TRUE
LIFE-Heart	431	Orn	E point-septal separation (mm)	0.0362781	0.0366257	0.990509	0.00228175	0.322484	0.779335	0.00565189	FALSE
LIFE-Heart	976	Orn	End-systolic volume (biplane, ml)	-0.0495845	0.0235024	-2.10976	0.00454912	0.0351335	0.139833	0.00565189	FALSE
LIFE-Heart	1111	Orn	Flow Propagation Velocity (cm/s)	-0.0120428	0.0230252	-0.523026	0.000246608	0.601061	0.949856	0.00565189	FALSE
LIFE-Heart	4170	Orn	Fractional shortening (%)	0.0238012	0.0115018	2.06935	0.00102635	0.0385747	0.139833	0.00565189	FALSE
LIFE-Heart	976	Orn	Left ventricular mass (g)	-0.000577802	0.023578	-0.024506	6.16572e-07	0.980454	0.980454	0.00565189	FALSE
LIFE-Heart	2491	Orn	Left ventricular function	-0.0601261	0.0160901	-3.73684	0.00557896	0.000190542	0.00435667	0.00565189	TRUE
LIFE-Heart	5346	Orn	Left ventricular internal diameter end diastole	-0.00280701	0.01017	-0.276009	1.42552e-05	0.782552	0.949856	0.00565189	FALSE
LIFE-Heart	4181	Orn	Left ventricular internal diameter end systole	-0.0137076	0.011484	-1.19362	0.000340811	0.232694	0.613465	0.00565189	FALSE
LIFE-Heart	4682	Orn	Back wall (M-mode, mm)	0.00468036	0.01088	0.430179	3.95398e-05	0.667085	0.949856	0.00565189	FALSE
LIFE-Heart	1318	Orn	Pulmonary venous flow diastolic (cm/s)	0.0136017	0.0209604	0.648925	0.000319885	0.5165	0.949856	0.00565189	FALSE
LIFE-Heart	1318	Orn	Pulmonary venous flow systolic (cm/s)	0.00336591	0.0209532	0.16064	1.96083e-05	0.872402	0.973064	0.00565189	FALSE
LIFE-Heart	5451	Orn	Septum (mm)	-0.00840759	0.0100807	-0.834031	0.000127642	0.4043	0.858821	0.00565189	FALSE
LIFE-Heart	2398	Orn	Tricuspid annular plane systolic excursion (mm)	0.00336728	0.0149499	0.225238	2.11733e-05	0.821813	0.953303	0.00565189	FALSE
LIFE-Heart	5854	Orn	NT-proBNP (pg/ml)	-0.0319483	0.00900834	-3.54652	0.00214471	0.00039341	0.00435667	0.00565189	TRUE
LIFE-Adult	9599	Orn	NT-proBNP (pg/ml)	0.0694179	0.00974051	7.12672	0.00526444	1.10193e-12	2.47935e-12	3.68881e-31	TRUE
LIFE-Heart	3039	Orn	Number of plaques	-0.00567975	0.0100736	-0.563826	0.000104665	0.572914	0.949856	0.00565189	FALSE
LIFE-Adult	9212	Orn	Number of plaques	0.0437509	0.00599978	7.29208	0.00574041	3.30402e-13	9.91206e-13	3.68881e-31	TRUE
LIFE-Heart	3098	Orn	Peripheral artery disease	-0.00285227	0.0439843	-0.0648474	1.35826e-06	0.9483	0.980454	0.00565189	FALSE
LIFE-Adult	8698	Orn	Peripheral artery disease	0.0745446	0.0291425	2.55793	0.00075185	0.0105465	0.0105465	3.68881e-31	TRUE
LIFE-Heart	5859	Orn	Main stem stenosis	0.111495	0.0376007	2.96523	0.00149896	0.00303678	0.0176133	0.00565189	TRUE
LIFE-Heart	5748	Orn	CAD score	0.0102014	0.0212829	0.479323	3.99828e-05	0.631727	0.949856	0.00565189	FALSE
LIFE-Heart	5685	Orn	Valvular disease	0.0123635	0.0455532	0.271407	1.29616e-05	0.786088	0.949856	0.00565189	FALSE
LIFE-Heart	3039	Orn	Any plaques	-0.0231093	0.0283226	-0.815932	0.000219163	0.414603	0.858821	0.00565189	FALSE
LIFE-Adult	9212	Orn	Any plaques	0.113785	0.0127483	8.92554	0.00857568	5.28672e-19	2.37902e-18	3.68881e-31	TRUE
LIFE-Heart	3038	Phe	Ankle brachial index	0.00262317	0.0127047	0.206473	1.40416e-05	0.836435	0.836435	5.07769e-11	FALSE
LIFE-Adult	8682	Phe	Ankle brachial index	0.00956022	0.0101856	0.938599	0.000101484	0.347963	0.347963	5.91478e-36	FALSE
LIFE-Adult	8578	Phe	Brachial-ankle pulse wave velocity	0.115781	0.00899149	12.8768	0.0189676	1.35505e-37	1.21954e-36	5.91478e-36	TRUE
LIFE-Adult	3934	Phe	Brachial-femoral pulse wave velocity	0.033032	0.0135	2.44682	0.0015203	0.0144558	0.0216837	5.91478e-36	TRUE
LIFE-Heart	5748	Phe	Number of vessel disease (50% stenosis)	0.079872	0.0110861	7.20469	0.0089528	6.56598e-13	1.90413e-11	5.07769e-11	TRUE
LIFE-Adult	8198	Phe	carotid-femoral pulse wave velocity	0.0321029	0.00928602	3.45712	0.00145611	0.000548753	0.000987755	5.91478e-36	TRUE
LIFE-Heart	2969	Phe	Carotid intima media thickness	0.100481	0.0164604	6.10437	0.0124035	1.1662e-09	1.12733e-08	5.07769e-11	TRUE
LIFE-Adult	9313	Phe	Carotid intima media thickness	0.0968152	0.00872969	11.0903	0.0130375	2.10417e-28	9.46874e-28	5.91478e-36	TRUE
LIFE-Heart	4700	Phe	Aortic bulb (mm)	0.0301011	0.0129576	2.32305	0.00114737	0.0202191	0.0366471	5.07769e-11	TRUE
LIFE-Heart	1537	Phe	Deceleration time (ms)	0.00685245	0.0229794	0.2982	5.7927e-05	0.765591	0.836435	5.07769e-11	FALSE
LIFE-Heart	971	Phe	End-diastolic volume (biplane, ml)	0.0270639	0.0281987	0.959756	0.000949697	0.337418	0.489255	5.07769e-11	FALSE
LIFE-Heart	1134	Phe	Ejection Fraction (biplane, %)	-0.0104258	0.0260424	-0.400339	0.000141562	0.688983	0.832521	5.07769e-11	FALSE
LIFE-Heart	1317	Phe	Ejection Fraction (%)	-0.00569163	0.02407	-0.236461	4.25183e-05	0.813112	0.836435	5.07769e-11	FALSE
LIFE-Heart	431	Phe	E point-septal separation (mm)	0.020862	0.0413642	0.504348	0.000592579	0.614276	0.774521	5.07769e-11	FALSE
LIFE-Heart	977	Phe	End-systolic volume (biplane, ml)	0.0100718	0.0279601	0.36022	0.000133068	0.718761	0.833763	5.07769e-11	FALSE
LIFE-Heart	1111	Phe	Flow Propagation Velocity (cm/s)	-0.00711991	0.0273273	-0.260542	6.12065e-05	0.794494	0.836435	5.07769e-11	FALSE
LIFE-Heart	4170	Phe	Fractional shortening (%)	-0.0470141	0.0136761	-3.43768	0.00282732	0.000592455	0.00143177	5.07769e-11	TRUE
LIFE-Heart	977	Phe	Left ventricular mass (g)	0.0695461	0.0278045	2.50125	0.00637576	0.0125386	0.0259728	5.07769e-11	TRUE
LIFE-Heart	2491	Phe	Left ventricular function	0.112419	0.0189855	5.92133	0.0138912	3.634e-09	2.63465e-08	5.07769e-11	TRUE
LIFE-Heart	5346	Phe	Left ventricular internal diameter end diastole	0.0593188	0.0120879	4.90728	0.00448603	9.50921e-07	2.75767e-06	5.07769e-11	TRUE
LIFE-Heart	4181	Phe	Left ventricular internal diameter end systole	0.064634	0.013662	4.73093	0.00532723	2.30871e-06	6.0866e-06	5.07769e-11	TRUE
LIFE-Heart	4682	Phe	Back wall (M-mode, mm)	0.0699867	0.0128714	5.43738	0.00627767	5.68196e-08	2.74628e-07	5.07769e-11	TRUE
LIFE-Heart	1318	Phe	Pulmonary venous flow diastolic (cm/s)	0.0182933	0.0243489	0.751301	0.000428732	0.452606	0.596617	5.07769e-11	FALSE
LIFE-Heart	1318	Phe	Pulmonary venous flow systolic (cm/s)	-0.0374203	0.0243427	-1.53723	0.00179244	0.124477	0.189991	5.07769e-11	FALSE
LIFE-Heart	5451	Phe	Septum (mm)	0.0659835	0.0119649	5.51477	0.00555035	3.65329e-08	2.11891e-07	5.07769e-11	TRUE
LIFE-Heart	2399	Phe	Tricuspid annular plane systolic excursion (mm)	-0.0430609	0.0179869	-2.39402	0.00238534	0.0167413	0.0323665	5.07769e-11	TRUE
LIFE-Heart	5854	Phe	NT-proBNP (pg/ml)	0.0648653	0.0106162	6.11005	0.00633905	1.06014e-09	1.12733e-08	5.07769e-11	TRUE
LIFE-Adult	9619	Phe	NT-proBNP (pg/ml)	-0.0190298	0.0134926	-1.41039	0.000206799	0.158457	0.178264	5.91478e-36	FALSE
LIFE-Heart	3039	Phe	Number of plaques	0.0246495	0.0119455	2.06349	0.00140008	0.0391508	0.0667866	5.07769e-11	FALSE
LIFE-Adult	9233	Phe	Number of plaques	0.07221	0.00826322	8.73872	0.00820482	2.76998e-18	6.23245e-18	5.91478e-36	TRUE
LIFE-Heart	3098	Phe	Peripheral artery disease	0.0420974	0.0519656	0.8101	0.000211926	0.417945	0.577162	5.07769e-11	FALSE
LIFE-Adult	8720	Phe	Peripheral artery disease	0.0806367	0.0403173	2.00005	0.000458635	0.0455254	0.0585326	5.91478e-36	FALSE
LIFE-Heart	5859	Phe	Main stem stenosis	0.228063	0.044295	5.14874	0.00450573	2.70808e-07	1.12192e-06	5.07769e-11	TRUE
LIFE-Heart	5748	Phe	CAD score	0.124361	0.0251144	4.9518	0.00424924	7.56322e-07	2.43704e-06	5.07769e-11	TRUE
LIFE-Heart	5685	Phe	Valvular disease	0.180271	0.0539189	3.34337	0.00196308	0.000833027	0.00185829	5.07769e-11	TRUE
LIFE-Heart	3039	Phe	Any plaques	0.0654225	0.0335902	1.94767	0.00124751	0.0515466	0.0830474	5.07769e-11	FALSE
LIFE-Adult	9233	Phe	Any plaques	0.162084	0.0175726	9.2237	0.00913224	3.50359e-20	1.05108e-19	5.91478e-36	TRUE
LIFE-Heart	3039	PiPA	Ankle brachial index	-0.00499068	0.00966183	-0.516536	8.78451e-05	0.605518	0.650371	2.63019e-07	FALSE
[truncated: 1,590 more rows]

## Sheet: Table_S04
Study	N	Metabolite	ASCVD_Phenotype	Effect_Estimate	Standard_Error	T_Statistic	Model_R_squared	Partial_R_squared	P_Value	Local_FDR	Global_FDR	Hierarchical_FDR=5%_Significant	Replicated_Associations
LIFE-Heart	3005	C0	Ankle brachial index	-0.0280824	0.0127705	-2.199	0.0958472	0.00388242	0.0279545	0.0424048	4.97487e-19	TRUE	TRUE
LIFE-Adult	8103	C0	Ankle brachial index	-0.0325354	0.0100794	-3.22791	0.165235	0.000336496	0.00125198	0.00189656	1.33697e-50	TRUE	TRUE
LIFE-Adult	8007	C0	Brachial-ankle pulse wave velocity	0.0153258	0.0116905	1.31096	0.166452	0.032312	0.189908	0.203189	1.33697e-50	FALSE	FALSE
LIFE-Adult	3496	C0	Brachial-femoral pulse wave velocity	0.0261112	0.0145034	1.80035	0.180227	0.00630044	0.0718912	0.0785669	1.33697e-50	FALSE	FALSE
LIFE-Heart	5618	C0	Number of vessel disease (50% stenosis)	1.41964e-05	0.0121835	0.00116522	0.0640267	0.00646708	0.99907	0.99907	4.97487e-19	FALSE	FALSE
LIFE-Adult	7664	C0	carotid-femoral pulse wave velocity	0.012688	0.00930247	1.36394	0.167689	0.00517001	0.172628	0.186001	1.33697e-50	FALSE	FALSE
LIFE-Heart	2934	C0	Carotid intima media thickness	-0.0135968	0.0176851	-0.768829	0.0944435	0.00434081	0.442057	0.489397	4.97487e-19	FALSE	FALSE
LIFE-Adult	8661	C0	Carotid intima media thickness	-0.0016769	0.0107124	-0.156538	0.162833	0.0236989	0.875612	0.881373	1.33697e-50	FALSE	FALSE
LIFE-Heart	4611	C0	Aortic bulb (mm)	0.0178238	0.0141074	1.26343	0.069397	0.00783833	0.206497	0.252613	4.97487e-19	FALSE	FALSE
LIFE-Heart	1513	C0	Deceleration time (ms)	-0.0321841	0.022603	-1.42389	0.104453	8.07007e-05	0.154688	0.195042	4.97487e-19	FALSE	FALSE
LIFE-Heart	960	C0	End-diastolic volume (biplane, ml)	0.00232614	0.0329286	0.0706421	0.0851464	0.0107533	0.943698	0.947542	4.97487e-19	FALSE	FALSE
LIFE-Heart	1122	C0	Ejection Fraction (biplane, %)	-0.0617467	0.0272218	-2.26828	0.0787349	0.0131692	0.0235044	0.0363249	4.97487e-19	TRUE	FALSE
LIFE-Heart	1280	C0	Ejection Fraction (%)	-0.00723707	0.0278998	-0.259396	0.061422	0.00311335	0.795372	0.825513	4.97487e-19	FALSE	FALSE
LIFE-Heart	428	C0	E point-septal separation (mm)	-0.0198688	0.0431801	-0.460137	0.0841533	0.000303789	0.645661	0.683071	4.97487e-19	FALSE	FALSE
LIFE-Heart	966	C0	End-systolic volume (biplane, ml)	0.0298448	0.0306515	0.973682	0.0845126	0.0103971	0.330463	0.38065	4.97487e-19	FALSE	FALSE
LIFE-Heart	1100	C0	Flow Propagation Velocity (cm/s)	0.031357	0.0261228	1.20037	0.106062	0.000503799	0.230257	0.278911	4.97487e-19	FALSE	FALSE
LIFE-Heart	4090	C0	Fractional shortening (%)	-0.0398061	0.0139205	-2.85953	0.0758467	0.00673155	0.00426424	0.00787368	4.97487e-19	TRUE	FALSE
LIFE-Heart	965	C0	Left ventricular mass (g)	0.0580275	0.0329439	1.7614	0.0885533	0.031121	0.0784928	0.109623	4.97487e-19	FALSE	FALSE
LIFE-Heart	2418	C0	Left ventricular function	0.105953	0.0198836	5.32864	0.059832	0.0165539	1.08174e-07	6.92592e-07	4.97487e-19	TRUE	FALSE
LIFE-Heart	5242	C0	Left ventricular internal diameter end diastole	0.0429345	0.0129041	3.32721	0.0720367	0.0108048	0.00088327	0.00190988	4.97487e-19	TRUE	FALSE
LIFE-Heart	4101	C0	Left ventricular internal diameter end systole	0.0725829	0.0143145	5.0706	0.0806415	0.0180887	4.14148e-07	2.34684e-06	4.97487e-19	TRUE	FALSE
LIFE-Heart	4595	C0	Back wall (M-mode, mm)	0.0234284	0.013854	1.69109	0.0703402	0.0119132	0.0908872	0.124465	4.97487e-19	FALSE	FALSE
LIFE-Heart	1302	C0	Pulmonary venous flow diastolic (cm/s)	0.0801229	0.0244482	3.27725	0.110724	0.00984224	0.00107624	0.00229691	4.97487e-19	TRUE	FALSE
LIFE-Heart	1302	C0	Pulmonary venous flow systolic (cm/s)	-0.0527763	0.0241147	-2.18855	0.10632	0.00439993	0.0288091	0.0433014	4.97487e-19	TRUE	FALSE
LIFE-Heart	5347	C0	Septum (mm)	0.0273805	0.0127371	2.14967	0.0692787	0.011159	0.0316264	0.046682	4.97487e-19	TRUE	FALSE
LIFE-Heart	2359	C0	Tricuspid annular plane systolic excursion (mm)	-0.109188	0.0181833	-6.00485	0.0631799	0.0119588	2.21375e-09	1.98432e-08	4.97487e-19	TRUE	FALSE
LIFE-Heart	5722	C0	NT-proBNP (pg/ml)	0.0915152	0.014126	6.47849	0.0712329	0.0174175	1.00404e-10	1.26921e-09	4.97487e-19	TRUE	FALSE
LIFE-Adult	8925	C0	NT-proBNP (pg/ml)	-0.0032882	0.0155178	-0.211899	0.163636	0.00035065	0.832191	0.843213	1.33697e-50	FALSE	FALSE
LIFE-Heart	3003	C0	Number of plaques	0.0429338	0.0124463	3.44953	0.0986506	0.0213758	0.000569349	0.00128756	4.97487e-19	TRUE	TRUE
LIFE-Adult	8586	C0	Number of plaques	0.033546	0.00926499	3.62072	0.165331	0.0323832	0.000295476	0.00049139	1.33697e-50	TRUE	TRUE
LIFE-Heart	3065	C0	Peripheral artery disease	0.161551	0.0516491	3.12786	0.097208	0.00816988	0.00177748	0.00363608	4.97487e-19	TRUE	TRUE
LIFE-Adult	8136	C0	Peripheral artery disease	0.105178	0.0393602	2.67218	0.165055	0.00339711	0.00755099	0.00946969	1.33697e-50	TRUE	TRUE
LIFE-Heart	5727	C0	Main stem stenosis	0.118932	0.0450634	2.63921	0.0655366	0.00315216	0.00833241	0.0142635	4.97487e-19	TRUE	FALSE
LIFE-Heart	5618	C0	CAD score	-0.0432362	0.0279797	-1.54527	0.0644256	0.00353912	0.122337	0.157885	4.97487e-19	FALSE	FALSE
LIFE-Heart	5561	C0	Valvular disease	0.327494	0.0546507	5.9925	0.0731951	0.0069626	2.19661e-09	1.98432e-08	4.97487e-19	TRUE	FALSE
LIFE-Heart	3003	C0	Any plaques	0.0959807	0.0341808	2.80803	0.097442	0.0159651	0.00501698	0.0090269	4.97487e-19	TRUE	TRUE
LIFE-Adult	8586	C0	Any plaques	0.0628539	0.0191641	3.27977	0.165102	0.0293414	0.00104308	0.00159591	1.33697e-50	TRUE	TRUE
LIFE-Heart	3005	C10	Ankle brachial index	-0.0423633	0.0128059	-3.3081	0.0440204	0.00652307	0.000950449	0.00633205	4.77003e-12	TRUE	FALSE
LIFE-Adult	8106	C10	Ankle brachial index	-0.00721571	0.0119748	-0.602575	0.0381709	6.4524e-07	0.546808	0.610669	1.39925e-18	FALSE	FALSE
LIFE-Adult	8010	C10	Brachial-ankle pulse wave velocity	0.0242709	0.0139194	1.74368	0.0391556	0.0150521	0.0812537	0.141271	1.39925e-18	FALSE	FALSE
LIFE-Adult	3496	C10	Brachial-femoral pulse wave velocity	-0.00741655	0.0168521	-0.440097	0.0506354	0.00318176	0.659894	0.701138	1.39925e-18	FALSE	FALSE
LIFE-Heart	5618	C10	Number of vessel disease (50% stenosis)	0.0239962	0.0120694	1.98818	0.0333333	0.00322124	0.04684	0.117697	4.77003e-12	FALSE	FALSE
LIFE-Adult	7667	C10	carotid-femoral pulse wave velocity	0.0324784	0.011172	2.90712	0.0372454	0.00546412	0.00365823	0.0094866	1.39925e-18	TRUE	FALSE
LIFE-Heart	2934	C10	Carotid intima media thickness	-0.0193219	0.0177921	-1.08598	0.0381169	0.000967462	0.277577	0.444304	4.77003e-12	FALSE	FALSE
LIFE-Adult	8664	C10	Carotid intima media thickness	-0.0488143	0.0127243	-3.8363	0.0379989	0.0037345	0.00012579	0.000370114	1.39925e-18	TRUE	FALSE
LIFE-Heart	4611	C10	Aortic bulb (mm)	-0.0243335	0.014147	-1.72005	0.0344498	1.88954e-05	0.0854903	0.182453	4.77003e-12	FALSE	FALSE
LIFE-Heart	1513	C10	Deceleration time (ms)	-0.0456174	0.0222235	-2.05266	0.0536416	0.000305541	0.040279	0.107921	4.77003e-12	FALSE	FALSE
LIFE-Heart	960	C10	End-diastolic volume (biplane, ml)	-0.00706285	0.0347761	-0.203095	0.0244373	0.000865371	0.839105	0.903228	4.77003e-12	FALSE	FALSE
LIFE-Heart	1122	C10	Ejection Fraction (biplane, %)	-0.032761	0.0285096	-1.14912	0.0242358	0.000619648	0.250756	0.414841	4.77003e-12	FALSE	FALSE
LIFE-Heart	1280	C10	Ejection Fraction (%)	-0.0223292	0.0284043	-0.786121	0.0148256	0.000138615	0.431944	0.56976	4.77003e-12	FALSE	FALSE
LIFE-Heart	428	C10	E point-septal separation (mm)	0.091789	0.0445368	2.06097	0.0574025	0.00431705	0.0399347	0.107584	4.77003e-12	FALSE	FALSE
LIFE-Heart	966	C10	End-systolic volume (biplane, ml)	-0.010543	0.032275	-0.326661	0.0240053	0.000427689	0.743997	0.842606	4.77003e-12	FALSE	FALSE
LIFE-Heart	1100	C10	Flow Propagation Velocity (cm/s)	0.00977098	0.0254632	0.383729	0.0681541	7.06097e-05	0.701255	0.803997	4.77003e-12	FALSE	FALSE
LIFE-Heart	4090	C10	Fractional shortening (%)	-0.0196132	0.0139299	-1.40799	0.0338118	0.000793159	0.15921	0.290705	4.77003e-12	FALSE	FALSE
LIFE-Heart	965	C10	Left ventricular mass (g)	-0.0132434	0.0341779	-0.387486	0.0220755	0.00279294	0.698483	0.802686	4.77003e-12	FALSE	FALSE
LIFE-Heart	2418	C10	Left ventricular function	0.0442764	0.0196931	2.24832	0.0394392	0.00371287	0.0246462	0.0778882	4.77003e-12	FALSE	FALSE
LIFE-Heart	5242	C10	Left ventricular internal diameter end diastole	0.0122806	0.0128241	0.957618	0.0323371	0.000126049	0.3383	0.497856	4.77003e-12	FALSE	FALSE
LIFE-Heart	4101	C10	Left ventricular internal diameter end systole	0.0198279	0.0143096	1.38564	0.0342583	0.000428933	0.165934	0.297668	4.77003e-12	FALSE	FALSE
LIFE-Heart	4595	C10	Back wall (M-mode, mm)	-0.00102086	0.0137871	-0.0740449	0.0331576	0.000220827	0.940978	0.963676	4.77003e-12	FALSE	FALSE
LIFE-Heart	1302	C10	Pulmonary venous flow diastolic (cm/s)	0.0552086	0.0241976	2.28158	0.0529567	0.00384968	0.0226773	0.073552	4.77003e-12	FALSE	FALSE
LIFE-Heart	1302	C10	Pulmonary venous flow systolic (cm/s)	-0.00367025	0.023839	-0.15396	0.0505599	0.000268362	0.877666	0.926812	4.77003e-12	FALSE	FALSE
LIFE-Heart	5347	C10	Septum (mm)	-0.00282727	0.0126623	-0.223282	0.0322963	0.000469752	0.823324	0.895708	4.77003e-12	FALSE	FALSE
LIFE-Heart	2359	C10	Tricuspid annular plane systolic excursion (mm)	-0.0479564	0.0183742	-2.60998	0.0275021	0.00438911	0.00911247	0.0371277	4.77003e-12	TRUE	FALSE
LIFE-Heart	5722	C10	NT-proBNP (pg/ml)	0.0801298	0.0140211	5.71495	0.0371602	0.00723178	1.15295e-08	1.83356e-07	4.77003e-12	TRUE	TRUE
LIFE-Adult	8928	C10	NT-proBNP (pg/ml)	0.0870382	0.0184137	4.72681	0.0384423	0.00922434	2.31566e-06	9.57557e-06	1.39925e-18	TRUE	TRUE
LIFE-Heart	3003	C10	Number of plaques	0.026757	0.0125194	2.13724	0.0392051	0.00470416	0.0326591	0.0958389	4.77003e-12	FALSE	FALSE
LIFE-Adult	8589	C10	Number of plaques	-0.00153615	0.0110204	-0.139392	0.0360619	0.00546807	0.889144	0.906927	1.39925e-18	FALSE	FALSE
LIFE-Heart	3065	C10	Peripheral artery disease	0.164647	0.0518005	3.17849	0.0431791	0.0056992	0.00149529	0.00905248	4.77003e-12	TRUE	FALSE
LIFE-Adult	8139	C10	Peripheral artery disease	0.0448136	0.0467367	0.958854	0.0388718	0.00039609	0.337661	0.453177	1.39925e-18	FALSE	FALSE
LIFE-Heart	5727	C10	Main stem stenosis	0.0618594	0.0447207	1.38324	0.032039	0.00153494	0.166646	0.297668	4.77003e-12	FALSE	FALSE
LIFE-Heart	5618	C10	CAD score	0.0118361	0.027733	0.426786	0.0326826	0.000501824	0.669552	0.78325	4.77003e-12	FALSE	FALSE
LIFE-Heart	5561	C10	Valvular disease	0.0584992	0.0545716	1.07197	0.0326365	0.00102826	0.283779	0.449702	4.77003e-12	FALSE	FALSE
LIFE-Heart	3003	C10	Any plaques	0.029958	0.0343804	0.871368	0.03798	0.0018919	0.383623	0.531253	4.77003e-12	FALSE	FALSE
LIFE-Adult	8589	C10	Any plaques	-0.0209206	0.0227928	-0.917857	0.0361545	0.00417244	0.358719	0.477253	1.39925e-18	FALSE	FALSE
LIFE-Heart	3005	C10:1	Ankle brachial index	-0.0317378	0.0121295	-2.61658	0.022349	0.00365302	0.00892642	0.082027	7.28897e-05	FALSE	FALSE
LIFE-Adult	8106	C10:1	Ankle brachial index	-0.00756099	0.0111537	-0.677888	0.0249597	8.71266e-07	0.497862	0.718612	8.80335e-17	FALSE	FALSE
LIFE-Adult	8010	C10:1	Brachial-ankle pulse wave velocity	-0.0137429	0.0129334	-1.06259	0.0280348	0.00971869	0.287998	0.512368	8.80335e-17	FALSE	FALSE
LIFE-Adult	3496	C10:1	Brachial-femoral pulse wave velocity	0.00288566	0.0157171	0.1836	0.0465856	0.0061481	0.854338	0.91286	8.80335e-17	FALSE	FALSE
LIFE-Heart	5618	C10:1	Number of vessel disease (50% stenosis)	0.000449878	0.0115255	0.0390334	0.0119553	0.000956464	0.968865	0.992998	7.28897e-05	FALSE	FALSE
LIFE-Adult	7667	C10:1	carotid-femoral pulse wave velocity	0.0128154	0.0103343	1.24008	0.0286341	0.00364198	0.214982	0.406077	8.80335e-17	FALSE	FALSE
LIFE-Heart	2934	C10:1	Carotid intima media thickness	-0.0240828	0.0166737	-1.44436	0.0172337	0.000294707	0.148746	0.455476	7.28897e-05	FALSE	FALSE
LIFE-Adult	8664	C10:1	Carotid intima media thickness	-0.0104107	0.0118081	-0.881659	0.0255696	0.0075297	0.377986	0.615232	8.80335e-17	FALSE	FALSE
LIFE-Heart	4611	C10:1	Aortic bulb (mm)	-0.0295827	0.0134461	-2.20009	0.0122205	0.000309127	0.02785	0.180659	7.28897e-05	FALSE	FALSE
LIFE-Heart	1513	C10:1	Deceleration time (ms)	-0.00698113	0.0212845	-0.327991	0.0295785	0.000205416	0.742965	0.971569	7.28897e-05	FALSE	FALSE
LIFE-Heart	960	C10:1	End-diastolic volume (biplane, ml)	-0.0362543	0.0326249	-1.11125	0.0107515	0.00120559	0.266745	0.626216	7.28897e-05	FALSE	FALSE
LIFE-Heart	1122	C10:1	Ejection Fraction (biplane, %)	0.0366314	0.0270187	1.35578	0.00701059	0.000838666	0.175447	0.507501	7.28897e-05	FALSE	FALSE
LIFE-Heart	1280	C10:1	Ejection Fraction (%)	0.0459766	0.0272581	1.68672	0.00984498	0.000580074	0.0919048	0.363247	7.28897e-05	FALSE	FALSE
LIFE-Heart	428	C10:1	E point-septal separation (mm)	-0.0104468	0.0423547	-0.246651	0.0151589	0.000306218	0.805302	0.985146	7.28897e-05	FALSE	FALSE
LIFE-Heart	966	C10:1	End-systolic volume (biplane, ml)	-0.0389653	0.0304455	-1.27984	0.00701775	0.00147358	0.200915	0.526607	7.28897e-05	FALSE	FALSE
LIFE-Heart	1100	C10:1	Flow Propagation Velocity (cm/s)	-0.0279079	0.0243892	-1.14427	0.0391977	0.0013856	0.252763	0.611486	7.28897e-05	FALSE	FALSE
LIFE-Heart	4090	C10:1	Fractional shortening (%)	-0.00392052	0.0132792	-0.295237	0.0109442	0.000242937	0.767828	0.97907	7.28897e-05	FALSE	FALSE
LIFE-Heart	965	C10:1	Left ventricular mass (g)	-0.0308522	0.0325619	-0.947496	0.0063669	0.00050848	0.343627	0.715941	7.28897e-05	FALSE	FALSE
LIFE-Heart	2418	C10:1	Left ventricular function	0.0253436	0.0190077	1.33333	0.00698827	0.00167411	0.182549	0.517224	7.28897e-05	FALSE	FALSE
LIFE-Heart	5242	C10:1	Left ventricular internal diameter end diastole	-0.0121148	0.0122431	-0.989518	0.0115762	5.13474e-05	0.322456	0.706536	7.28897e-05	FALSE	FALSE
LIFE-Heart	4101	C10:1	Left ventricular internal diameter end systole	-0.00865172	0.0137016	-0.63144	0.0100444	5.25805e-07	0.527788	0.90084	7.28897e-05	FALSE	FALSE
LIFE-Heart	4595	C10:1	Back wall (M-mode, mm)	-0.00537162	0.0131958	-0.407071	0.0108113	0.000375084	0.683975	0.946652	7.28897e-05	FALSE	FALSE
LIFE-Heart	1302	C10:1	Pulmonary venous flow diastolic (cm/s)	0.0331148	0.0228977	1.44621	0.0305993	0.00172097	0.148362	0.455476	7.28897e-05	FALSE	FALSE
LIFE-Heart	1302	C10:1	Pulmonary venous flow systolic (cm/s)	-0.00626402	0.022536	-0.277955	0.0288224	1.63882e-06	0.781091	0.97907	7.28897e-05	FALSE	FALSE
LIFE-Heart	5347	C10:1	Septum (mm)	-0.00246045	0.0120498	-0.204191	0.012228	0.000525832	0.838212	0.987974	7.28897e-05	FALSE	FALSE
LIFE-Heart	2359	C10:1	Tricuspid annular plane systolic excursion (mm)	-0.00208122	0.017219	-0.120868	0.00498681	7.24132e-05	0.903806	0.987974	7.28897e-05	FALSE	FALSE
LIFE-Heart	5722	C10:1	NT-proBNP (pg/ml)	0.0382367	0.0133775	2.85829	0.0130839	0.00396868	0.0042747	0.0602121	7.28897e-05	FALSE	FALSE
LIFE-Adult	8928	C10:1	NT-proBNP (pg/ml)	0.119146	0.0170425	6.99114	0.0316228	0.014294	2.92288e-12	5.59001e-11	8.80335e-17	TRUE	FALSE
LIFE-Heart	3003	C10:1	Number of plaques	0.017551	0.0118082	1.48635	0.0182062	0.00263943	0.137293	0.435032	7.28897e-05	FALSE	FALSE
LIFE-Adult	8589	C10:1	Number of plaques	0.00550964	0.0102087	0.5397	0.0253508	0.00596582	0.589418	0.791125	8.80335e-17	FALSE	FALSE
LIFE-Heart	3065	C10:1	Peripheral artery disease	0.100892	0.0491016	2.05475	0.0211459	0.00243722	0.0399882	0.229235	7.28897e-05	FALSE	FALSE
LIFE-Adult	8139	C10:1	Peripheral artery disease	0.00723925	0.0435118	0.166374	0.0255458	0.000137981	0.867866	0.91286	8.80335e-17	FALSE	FALSE
LIFE-Heart	5727	C10:1	Main stem stenosis	0.0564473	0.0425764	1.32579	0.011944	0.00106488	0.184963	0.521068	7.28897e-05	FALSE	FALSE
LIFE-Heart	5618	C10:1	CAD score	0.000795212	0.0264742	0.0300372	0.0119552	0.000424467	0.976038	0.992998	7.28897e-05	FALSE	FALSE
LIFE-Heart	5561	C10:1	Valvular disease	0.0253452	0.0519348	0.488019	0.0116776	0.000464893	0.625556	0.935861	7.28897e-05	FALSE	FALSE
LIFE-Heart	3003	C10:1	Any plaques	0.0320787	0.0324133	0.989676	0.017802	0.00152994	0.322413	0.706536	7.28897e-05	FALSE	FALSE
LIFE-Adult	8589	C10:1	Any plaques	0.0144901	0.0211149	0.686251	0.0253712	0.00601531	0.492573	0.71775	8.80335e-17	FALSE	FALSE
LIFE-Heart	3005	C12	Ankle brachial index	-0.0290201	0.0124877	-2.32389	0.0265031	0.00349741	0.0201981	0.0796614	2.25383e-05	FALSE	FALSE
LIFE-Adult	8105	C12	Ankle brachial index	-0.0203454	0.011359	-1.79113	0.0246974	7.58771e-05	0.0733104	0.130424	4.278e-08	FALSE	FALSE
LIFE-Adult	8009	C12	Brachial-ankle pulse wave velocity	0.0373215	0.0131669	2.8345	0.0258766	0.0128606	0.00460131	0.0179992	4.278e-08	TRUE	FALSE
LIFE-Adult	3495	C12	Brachial-femoral pulse wave velocity	-0.00536035	0.0159087	-0.336944	0.0344667	0.00137828	0.73618	0.838099	4.278e-08	FALSE	FALSE
LIFE-Heart	5618	C12	Number of vessel disease (50% stenosis)	0.0208351	0.0119301	1.74644	0.0218089	0.00342474	0.0807898	0.211858	2.25383e-05	FALSE	FALSE
LIFE-Adult	7666	C12	carotid-femoral pulse wave velocity	0.0118811	0.0105394	1.1273	0.0239277	0.0018284	0.259652	0.385697	4.278e-08	FALSE	FALSE
LIFE-Heart	2934	C12	Carotid intima media thickness	-0.0252872	0.0173246	-1.45961	0.0262222	0.000726232	0.144504	0.300592	2.25383e-05	FALSE	FALSE
LIFE-Adult	8663	C12	Carotid intima media thickness	-0.0127491	0.0120968	-1.05392	0.0265382	0.0052358	0.291949	0.428263	4.278e-08	FALSE	FALSE
LIFE-Heart	4611	C12	Aortic bulb (mm)	0.0160602	0.0138087	1.16305	0.0191909	0.00156549	0.244869	0.440585	2.25383e-05	FALSE	FALSE
LIFE-Heart	1513	C12	Deceleration time (ms)	-0.0649054	0.021667	-2.99559	0.0454235	0.00220908	0.00278417	0.016739	2.25383e-05	TRUE	FALSE
LIFE-Heart	960	C12	End-diastolic volume (biplane, ml)	-0.015492	0.0341236	-0.453997	0.0223939	0.000109636	0.649936	0.845429	2.25383e-05	FALSE	FALSE
LIFE-Heart	1122	C12	Ejection Fraction (biplane, %)	-0.0354902	0.0280898	-1.26345	0.0199898	0.00186716	0.206693	0.402588	2.25383e-05	FALSE	FALSE
LIFE-Heart	1280	C12	Ejection Fraction (%)	0.00099617	0.0282733	0.0352336	0.0212711	8.5214e-05	0.971899	0.979849	2.25383e-05	FALSE	FALSE
LIFE-Heart	428	C12	E point-septal separation (mm)	-0.0261932	0.0437163	-0.599162	0.0156882	0.00206192	0.549395	0.762962	2.25383e-05	FALSE	FALSE
LIFE-Heart	966	C12	End-systolic volume (biplane, ml)	0.00677198	0.031765	0.21319	0.0207969	4.72737e-05	0.831225	0.954618	2.25383e-05	FALSE	FALSE
LIFE-Heart	1100	C12	Flow Propagation Velocity (cm/s)	-0.0276431	0.024631	-1.12229	0.0368359	0.00117918	0.261988	0.458015	2.25383e-05	FALSE	FALSE
LIFE-Heart	4090	C12	Fractional shortening (%)	-0.0204324	0.0135725	-1.50543	0.0193057	0.00180581	0.132291	0.286363	2.25383e-05	FALSE	FALSE
LIFE-Heart	965	C12	Left ventricular mass (g)	0.0178146	0.0340593	0.523046	0.0166215	0.000662603	0.601065	0.803049	2.25383e-05	FALSE	FALSE
LIFE-Heart	2418	C12	Left ventricular function	0.00782307	0.0197115	0.396878	0.0328834	0.00113713	0.691493	0.868493	2.25383e-05	FALSE	FALSE
LIFE-Heart	5242	C12	Left ventricular internal diameter end diastole	0.0313193	0.012662	2.4735	0.0228826	0.00217661	0.0134114	0.0595659	2.25383e-05	FALSE	FALSE
LIFE-Heart	4101	C12	Left ventricular internal diameter end systole	0.0314779	0.0139828	2.25119	0.0227653	0.0027456	0.0244263	0.0912287	2.25383e-05	FALSE	FALSE
LIFE-Heart	4595	C12	Back wall (M-mode, mm)	0.011954	0.0135045	0.885188	0.0224447	0.00193595	0.376102	0.584915	2.25383e-05	FALSE	FALSE
LIFE-Heart	1302	C12	Pulmonary venous flow diastolic (cm/s)	0.0199861	0.0234794	0.851218	0.034717	0.000517931	0.394807	0.598892	2.25383e-05	FALSE	FALSE
LIFE-Heart	1302	C12	Pulmonary venous flow systolic (cm/s)	-0.0254439	0.0231287	-1.1001	0.0363692	0.0005957	0.271493	0.464814	2.25383e-05	FALSE	FALSE
LIFE-Heart	5347	C12	Septum (mm)	-0.00430685	0.0124859	-0.344936	0.0221727	0.000842756	0.730156	0.895826	2.25383e-05	FALSE	FALSE
LIFE-Heart	2359	C12	Tricuspid annular plane systolic excursion (mm)	-0.0392963	0.0181533	-2.16469	0.0205561	0.00245111	0.0305122	0.109799	2.25383e-05	FALSE	FALSE
LIFE-Heart	5722	C12	NT-proBNP (pg/ml)	0.054806	0.0138531	3.95622	0.0244142	0.00739398	7.7068e-05	0.00112524	2.25383e-05	TRUE	TRUE
LIFE-Adult	8927	C12	NT-proBNP (pg/ml)	0.0781944	0.0174779	4.47389	0.0284646	0.00505432	7.7762e-06	7.93172e-05	4.278e-08	TRUE	TRUE
LIFE-Heart	3003	C12	Number of plaques	0.0185985	0.0121979	1.52473	0.0264112	0.00405733	0.127433	0.281808	2.25383e-05	FALSE	FALSE
LIFE-Adult	8588	C12	Number of plaques	-0.0054992	0.0104455	-0.526464	0.0256186	0.00445599	0.59858	0.732662	4.278e-08	FALSE	FALSE
LIFE-Heart	3065	C12	Peripheral artery disease	0.0786929	0.0506245	1.55444	0.0265144	0.00222152	0.120183	0.274306	2.25383e-05	FALSE	FALSE
LIFE-Adult	8138	C12	Peripheral artery disease	-0.00125214	0.0442994	-0.0282653	0.02435	7.98822e-05	0.977451	0.982949	4.278e-08	FALSE	FALSE
LIFE-Heart	5727	C12	Main stem stenosis	0.11731	0.044099	2.66014	0.0229071	0.00271169	0.00783265	0.0398092	2.25383e-05	TRUE	FALSE
LIFE-Heart	5618	C12	CAD score	-0.0417762	0.0274054	-1.52438	0.0216821	0.00012403	0.127471	0.281808	2.25383e-05	FALSE	FALSE
LIFE-Heart	5561	C12	Valvular disease	0.045577	0.0538003	0.847152	0.0221054	0.000617142	0.396947	0.600291	2.25383e-05	FALSE	FALSE
LIFE-Heart	3003	C12	Any plaques	0.0308241	0.0334846	0.920547	0.0259296	0.00226556	0.357361	0.564677	2.25383e-05	FALSE	FALSE
LIFE-Adult	8588	C12	Any plaques	-0.00511242	0.0216006	-0.236679	0.0255935	0.00444249	0.812911	0.902393	4.278e-08	FALSE	FALSE
LIFE-Heart	3005	C14	Ankle brachial index	-0.0358453	0.0134264	-2.66975	0.0236322	0.0046334	0.0076318	0.060671	4.86881e-05	FALSE	FALSE
LIFE-Adult	8106	C14	Ankle brachial index	-0.00909528	0.011845	-0.767857	0.0289858	3.67442e-05	0.442594	0.583767	5.30463e-10	FALSE	FALSE
LIFE-Adult	8010	C14	Brachial-ankle pulse wave velocity	0.0147985	0.013724	1.07829	0.028296	0.00980024	0.280937	0.397994	5.30463e-10	FALSE	FALSE
LIFE-Adult	3496	C14	Brachial-femoral pulse wave velocity	-0.00774244	0.0166262	-0.465677	0.0441388	0.00115597	0.641476	0.746872	5.30463e-10	FALSE	FALSE
LIFE-Heart	5618	C14	Number of vessel disease (50% stenosis)	1.72341e-05	0.0127409	0.00135266	0.0149416	0.00137432	0.998921	0.998921	4.86881e-05	FALSE	FALSE
LIFE-Adult	7667	C14	carotid-femoral pulse wave velocity	-0.00357984	0.0109455	-0.327061	0.0270437	0.000655957	0.743631	0.824461	5.30463e-10	FALSE	FALSE
LIFE-Heart	2934	C14	Carotid intima media thickness	-0.0187531	0.0185029	-1.01352	0.0244044	0.00164873	0.310894	0.584612	4.86881e-05	FALSE	FALSE
LIFE-Adult	8664	C14	Carotid intima media thickness	0.0191746	0.0125974	1.5221	0.0277496	0.00834886	0.12802	0.22258	5.30463e-10	FALSE	FALSE
LIFE-Heart	4611	C14	Aortic bulb (mm)	-0.000358713	0.0147409	-0.0243345	0.0179696	0.0007751	0.980587	0.994711	4.86881e-05	FALSE	FALSE
LIFE-Heart	1513	C14	Deceleration time (ms)	-0.0393581	0.0230855	-1.70489	0.0490209	5.71582e-05	0.0884232	0.284919	4.86881e-05	FALSE	FALSE
LIFE-Heart	960	C14	End-diastolic volume (biplane, ml)	-0.0117995	0.0362568	-0.325443	-0.00183894	0.00118039	0.744918	0.877037	4.86881e-05	FALSE	FALSE
LIFE-Heart	1122	C14	Ejection Fraction (biplane, %)	-0.0169672	0.0295791	-0.57362	-0.00111099	0.00148772	0.566342	0.7932	4.86881e-05	FALSE	FALSE
LIFE-Heart	1280	C14	Ejection Fraction (%)	-0.0593459	0.0302174	-1.96396	-0.0020326	0.0041253	0.0497535	0.19781	4.86881e-05	FALSE	FALSE
LIFE-Heart	428	C14	E point-septal separation (mm)	0.0413142	0.0468995	0.88091	-0.00676746	0.00385762	0.378881	0.648571	4.86881e-05	FALSE	FALSE
LIFE-Heart	966	C14	End-systolic volume (biplane, ml)	0.0222068	0.0335636	0.661634	-0.00147586	0.00294501	0.508367	0.748134	4.86881e-05	FALSE	FALSE
LIFE-Heart	1100	C14	Flow Propagation Velocity (cm/s)	0.0181858	0.0270251	0.672924	0.0356601	0.000169813	0.501139	0.74335	4.86881e-05	FALSE	FALSE
LIFE-Heart	4090	C14	Fractional shortening (%)	-0.0297699	0.0144675	-2.05772	0.020759	0.00267145	0.0396807	0.174666	4.86881e-05	FALSE	FALSE
LIFE-Heart	965	C14	Left ventricular mass (g)	0.0634259	0.0359156	1.76597	0.000466968	0.00718838	0.0777227	0.26984	4.86881e-05	FALSE	FALSE
LIFE-Heart	2418	C14	Left ventricular function	0.0269707	0.0209096	1.28987	0.00920438	0.0015345	0.197219	0.470275	4.86881e-05	FALSE	FALSE
LIFE-Heart	5242	C14	Left ventricular internal diameter end diastole	0.0262297	0.0134494	1.95025	0.0167825	0.00153227	0.0511992	0.199677	4.86881e-05	FALSE	FALSE
LIFE-Heart	4101	C14	Left ventricular internal diameter end systole	0.0505762	0.0149125	3.39153	0.022656	0.0050856	0.00070164	0.00910285	4.86881e-05	TRUE	FALSE
LIFE-Heart	4595	C14	Back wall (M-mode, mm)	0.0277745	0.0143755	1.93207	0.0178206	0.0033645	0.0534126	0.202557	4.86881e-05	FALSE	FALSE
LIFE-Heart	1302	C14	Pulmonary venous flow diastolic (cm/s)	0.0504463	0.0249626	2.02088	0.0443595	0.00208246	0.0434997	0.180213	4.86881e-05	FALSE	FALSE
LIFE-Heart	1302	C14	Pulmonary venous flow systolic (cm/s)	-0.0192238	0.0246026	-0.781371	0.0430556	0.000606644	0.434728	0.687258	4.86881e-05	FALSE	FALSE
LIFE-Heart	5347	C14	Septum (mm)	0.0393864	0.0132488	2.97283	0.0165146	0.00499598	0.00296386	0.0292236	4.86881e-05	TRUE	FALSE
LIFE-Heart	2359	C14	Tricuspid annular plane systolic excursion (mm)	-0.0221059	0.0191004	-1.15735	0.00546645	0.000592213	0.247245	0.518804	4.86881e-05	FALSE	FALSE
LIFE-Heart	5722	C14	NT-proBNP (pg/ml)	0.0641205	0.0147594	4.34438	0.0186606	0.00753426	1.42092e-05	0.000636829	4.86881e-05	TRUE	TRUE
LIFE-Adult	8928	C14	NT-proBNP (pg/ml)	0.0602771	0.0182076	3.31054	0.0284748	0.0025855	0.000934858	0.00510833	5.30463e-10	TRUE	TRUE
LIFE-Heart	3003	C14	Number of plaques	0.0201558	0.0130614	1.54315	0.0265438	0.00550853	0.1229	0.352266	4.86881e-05	FALSE	FALSE
LIFE-Adult	8589	C14	Number of plaques	-0.00155495	0.0108788	-0.142935	0.0284779	0.00500011	0.886345	0.91014	5.30463e-10	FALSE	FALSE
LIFE-Heart	3065	C14	Peripheral artery disease	0.108216	0.0543423	1.99139	0.0236061	0.00312144	0.0465276	0.186489	4.86881e-05	FALSE	FALSE
LIFE-Adult	8139	C14	Peripheral artery disease	0.0572514	0.0462055	1.23906	0.0290411	0.000500549	0.215358	0.347393	5.30463e-10	FALSE	FALSE
LIFE-Heart	5727	C14	Main stem stenosis	0.0409979	0.0470317	0.871709	0.0155823	0.000548048	0.383404	0.649547	4.86881e-05	FALSE	FALSE
LIFE-Heart	5618	C14	CAD score	-0.0703579	0.0292509	-2.40533	0.0159581	2.69865e-05	0.0161902	0.0961658	4.86881e-05	FALSE	FALSE
LIFE-Heart	5561	C14	Valvular disease	0.198006	0.0571754	3.46314	0.0171431	0.00296041	0.000537944	0.00757733	4.86881e-05	TRUE	FALSE
LIFE-Heart	3003	C14	Any plaques	0.00534645	0.0358603	0.149091	0.0257747	0.0019598	0.881492	0.950074	4.86881e-05	FALSE	FALSE
LIFE-Adult	8589	C14	Any plaques	-0.0149843	0.0225004	-0.665957	0.0285258	0.00400131	0.505456	0.637694	5.30463e-10	FALSE	FALSE
LIFE-Heart	3005	C14:1	Ankle brachial index	-0.0142797	0.0121835	-1.17205	0.0470068	0.00226762	0.241271	0.397814	1.00101e-11	FALSE	FALSE
LIFE-Adult	8106	C14:1	Ankle brachial index	-0.0282121	0.0114935	-2.45462	0.0328527	0.000602235	0.0141243	0.0313192	1.72205e-09	TRUE	FALSE
LIFE-Adult	8010	C14:1	Brachial-ankle pulse wave velocity	0.0478551	0.0133279	3.59059	0.0333338	0.0159478	0.000331913	0.00130212	1.72205e-09	TRUE	FALSE
LIFE-Adult	3496	C14:1	Brachial-femoral pulse wave velocity	0.0239972	0.0161476	1.48611	0.0539589	0.00602668	0.13734	0.169614	1.72205e-09	FALSE	FALSE
LIFE-Heart	5618	C14:1	Number of vessel disease (50% stenosis)	0.0162369	0.0118541	1.36972	0.0293103	0.00325487	0.170828	0.306249	1.00101e-11	FALSE	FALSE
LIFE-Adult	7667	C14:1	carotid-femoral pulse wave velocity	0.0210397	0.0106569	1.97427	0.0323155	0.0032921	0.0483866	0.0841268	1.72205e-09	FALSE	FALSE
LIFE-Heart	2934	C14:1	Carotid intima media thickness	-0.0368551	0.0169099	-2.1795	0.0462655	7.602e-05	0.0293746	0.0947911	1.00101e-11	FALSE	FALSE
LIFE-Adult	8664	C14:1	Carotid intima media thickness	-0.033615	0.0122183	-2.75121	0.0310403	0.00381244	0.00594994	0.0151723	1.72205e-09	TRUE	FALSE
LIFE-Heart	4611	C14:1	Aortic bulb (mm)	-0.013212	0.0137394	-0.96162	0.0317998	6.17586e-06	0.336291	0.507007	1.00101e-11	FALSE	FALSE
LIFE-Heart	1513	C14:1	Deceleration time (ms)	-0.0271454	0.02093	-1.29697	0.0617109	0.000173973	0.194843	0.339426	1.00101e-11	FALSE	FALSE
LIFE-Heart	960	C14:1	End-diastolic volume (biplane, ml)	0.0418519	0.0333111	1.25639	0.0255487	0.00401019	0.209284	0.359502	1.00101e-11	FALSE	FALSE
LIFE-Heart	1122	C14:1	Ejection Fraction (biplane, %)	-0.0536293	0.0273058	-1.96403	0.0239383	0.00566778	0.0497775	0.133085	1.00101e-11	FALSE	FALSE
LIFE-Heart	1280	C14:1	Ejection Fraction (%)	-0.051027	0.02755	-1.85216	0.0225677	0.00521137	0.0642362	0.157555	1.00101e-11	FALSE	FALSE
LIFE-Heart	428	C14:1	E point-septal separation (mm)	0.0899533	0.0422372	2.12972	0.0186547	0.0150809	0.0337885	0.103667	1.00101e-11	FALSE	FALSE
LIFE-Heart	966	C14:1	End-systolic volume (biplane, ml)	0.0557436	0.0308204	1.80866	0.0287642	0.00691478	0.0708202	0.167401	1.00101e-11	FALSE	FALSE
LIFE-Heart	1100	C14:1	Flow Propagation Velocity (cm/s)	0.0037678	0.0237764	0.158468	0.078569	4.14122e-05	0.874118	0.934794	1.00101e-11	FALSE	FALSE
LIFE-Heart	4090	C14:1	Fractional shortening (%)	-0.0715273	0.013493	-5.30108	0.0375699	0.0100252	1.21223e-07	1.66008e-06	1.00101e-11	TRUE	FALSE
LIFE-Heart	965	C14:1	Left ventricular mass (g)	0.025566	0.0329728	0.775365	0.0234493	0.00293894	0.438317	0.606691	1.00101e-11	FALSE	FALSE
LIFE-Heart	2418	C14:1	Left ventricular function	0.0521327	0.0198474	2.62668	0.0219501	0.00510445	0.00867711	0.0399796	1.00101e-11	TRUE	FALSE
LIFE-Heart	5242	C14:1	Left ventricular internal diameter end diastole	0.0473442	0.0125638	3.76829	0.0332088	0.0034823	0.000166177	0.00113785	1.00101e-11	TRUE	FALSE
LIFE-Heart	4101	C14:1	Left ventricular internal diameter end systole	0.0741046	0.0139039	5.32975	0.0367287	0.00918084	1.03657e-07	1.5013e-06	1.00101e-11	TRUE	FALSE
LIFE-Heart	4595	C14:1	Back wall (M-mode, mm)	0.0120396	0.013426	0.896731	0.0298665	0.00192104	0.36991	0.542133	1.00101e-11	FALSE	FALSE
LIFE-Heart	1302	C14:1	Pulmonary venous flow diastolic (cm/s)	0.0249927	0.0226441	1.10372	0.0601024	0.00188303	0.269923	0.429265	1.00101e-11	FALSE	FALSE
LIFE-Heart	1302	C14:1	Pulmonary venous flow systolic (cm/s)	0.0196561	0.0222874	0.881937	0.0623901	0.00171484	0.377976	0.548065	1.00101e-11	FALSE	FALSE
LIFE-Heart	5347	C14:1	Septum (mm)	-0.00131616	0.0124261	-0.10592	0.0291743	0.00097625	0.91565	0.958419	1.00101e-11	FALSE	FALSE
LIFE-Heart	2359	C14:1	Tricuspid annular plane systolic excursion (mm)	-0.0390999	0.0180384	-2.16759	0.0163458	0.00288876	0.0302903	0.0963427	1.00101e-11	FALSE	FALSE
LIFE-Heart	5722	C14:1	NT-proBNP (pg/ml)	0.0895423	0.0137183	6.52723	0.0361356	0.0154625	7.27854e-11	3.98702e-09	1.00101e-11	TRUE	TRUE
LIFE-Adult	8928	C14:1	NT-proBNP (pg/ml)	0.0997074	0.0176668	5.64376	0.0342378	0.00833427	1.71471e-08	4.3725e-07	1.72205e-09	TRUE	TRUE
LIFE-Heart	3003	C14:1	Number of plaques	0.0328133	0.0119322	2.74998	0.0481223	0.00834629	0.00599576	0.0301039	1.00101e-11	TRUE	FALSE
LIFE-Adult	8589	C14:1	Number of plaques	0.00649885	0.0105692	0.614883	0.0297713	0.00618656	0.538648	0.568244	1.72205e-09	FALSE	FALSE
LIFE-Heart	3065	C14:1	Peripheral artery disease	0.0383074	0.0494699	0.774358	0.048505	0.00155858	0.438779	0.606691	1.00101e-11	FALSE	FALSE
LIFE-Adult	8139	C14:1	Peripheral artery disease	0.027334	0.0448506	0.609445	0.031736	0.000390868	0.542246	0.568244	1.72205e-09	FALSE	FALSE
LIFE-Heart	5727	C14:1	Main stem stenosis	0.0829228	0.0438018	1.89314	0.0294212	0.00182282	0.0583901	0.149929	1.00101e-11	FALSE	FALSE
LIFE-Heart	5618	C14:1	CAD score	-0.0179834	0.0272326	-0.660364	0.0290607	0.000701953	0.509047	0.669228	1.00101e-11	FALSE	FALSE
LIFE-Heart	5561	C14:1	Valvular disease	0.145068	0.0533312	2.72014	0.029787	0.00254825	0.00654584	0.0319515	1.00101e-11	TRUE	FALSE
LIFE-Heart	3003	C14:1	Any plaques	0.0747143	0.03276	2.28066	0.047371	0.00596681	0.0226389	0.0826739	1.00101e-11	FALSE	FALSE
LIFE-Adult	8589	C14:1	Any plaques	0.0131617	0.0218608	0.602069	0.0297696	0.00586559	0.547144	0.569476	1.72205e-09	FALSE	FALSE
LIFE-Heart	3005	C14OH	Ankle brachial index	-0.0134145	0.0109985	-1.21967	0.00647097	0.00117892	0.222688	0.613325	0.0254031	FALSE	FALSE
LIFE-Adult	8106	C14OH	Ankle brachial index	-0.00164859	0.00948814	-0.173753	0.00411343	1.48458e-05	0.862064	0.949544	0.489307	FALSE	FALSE
LIFE-Adult	8010	C14OH	Brachial-ankle pulse wave velocity	0.00321334	0.0110161	0.291696	0.00404393	0.00174892	0.770527	0.906851	0.489307	FALSE	FALSE
LIFE-Adult	3496	C14OH	Brachial-femoral pulse wave velocity	-0.00232008	0.0139751	-0.166016	0.00736614	0.000478498	0.868154	0.949544	0.489307	FALSE	FALSE
LIFE-Heart	5618	C14OH	Number of vessel disease (50% stenosis)	-0.0151942	0.0101317	-1.49967	0.00753145	1.99409e-05	0.133757	0.495807	0.0254031	FALSE	FALSE
LIFE-Adult	7667	C14OH	carotid-femoral pulse wave velocity	-0.0113467	0.00882834	-1.28526	0.00393697	9.21838e-07	0.198742	0.509341	0.489307	FALSE	FALSE
LIFE-Heart	2934	C14OH	Carotid intima media thickness	-0.00594015	0.0150348	-0.395093	0.00736176	0.00064192	0.692803	0.91324	0.0254031	FALSE	FALSE
LIFE-Adult	8664	C14OH	Carotid intima media thickness	-0.0109585	0.0100712	-1.0881	0.00287373	0.000339403	0.276582	0.509341	0.489307	FALSE	FALSE
LIFE-Heart	4611	C14OH	Aortic bulb (mm)	0.0108059	0.0117059	0.923121	0.00801217	0.000564312	0.355993	0.743662	0.0254031	FALSE	FALSE
LIFE-Heart	1513	C14OH	Deceleration time (ms)	-0.0262834	0.0192861	-1.36282	0.023389	0.000378915	0.173145	0.56241	0.0254031	FALSE	FALSE
LIFE-Heart	960	C14OH	End-diastolic volume (biplane, ml)	0.0219195	0.0277923	0.788689	-0.000477143	0.00104466	0.430492	0.778388	0.0254031	FALSE	FALSE
LIFE-Heart	1122	C14OH	Ejection Fraction (biplane, %)	0.00604336	0.0227851	0.265233	-0.00617725	1.16203e-05	0.79088	0.950267	0.0254031	FALSE	FALSE
LIFE-Heart	1280	C14OH	Ejection Fraction (%)	-0.0216479	0.0240484	-0.900177	0.00329752	0.00276861	0.368198	0.747002	0.0254031	FALSE	FALSE
LIFE-Heart	428	C14OH	E point-septal separation (mm)	0.0392225	0.0366287	1.07081	-0.0126801	0.00224086	0.284881	0.660839	0.0254031	FALSE	FALSE
LIFE-Heart	966	C14OH	End-systolic volume (biplane, ml)	0.0210527	0.026093	0.806831	-0.00113611	0.00148876	0.419966	0.778358	0.0254031	FALSE	FALSE
LIFE-Heart	1100	C14OH	Flow Propagation Velocity (cm/s)	0.0238576	0.0222173	1.07383	0.0156169	0.00103352	0.28314	0.660839	0.0254031	FALSE	FALSE
LIFE-Heart	4090	C14OH	Fractional shortening (%)	-0.0149751	0.0115341	-1.29833	0.00766993	0.000763704	0.194249	0.580393	0.0254031	FALSE	FALSE
LIFE-Heart	965	C14OH	Left ventricular mass (g)	0.0321844	0.0283539	1.13509	1.91241e-06	0.00127376	0.256623	0.648795	0.0254031	FALSE	FALSE
LIFE-Heart	2418	C14OH	Left ventricular function	-0.00605675	0.0161125	-0.375903	0.00900328	3.75359e-05	0.707023	0.921096	0.0254031	FALSE	FALSE
LIFE-Heart	5242	C14OH	Left ventricular internal diameter end diastole	-0.0045334	0.0107667	-0.421056	0.00802872	9.14466e-06	0.673731	0.897702	0.0254031	FALSE	FALSE
LIFE-Heart	4101	C14OH	Left ventricular internal diameter end systole	0.0101601	0.0118976	0.853966	0.00739873	0.000548501	0.393174	0.77017	0.0254031	FALSE	FALSE
LIFE-Heart	4595	C14OH	Back wall (M-mode, mm)	0.00735652	0.0114211	0.644119	0.00795946	0.00126839	0.519531	0.800402	0.0254031	FALSE	FALSE
LIFE-Heart	1302	C14OH	Pulmonary venous flow diastolic (cm/s)	0.0146815	0.0207796	0.706536	0.0244372	0.00133603	0.479983	0.793036	0.0254031	FALSE	FALSE
LIFE-Heart	1302	C14OH	Pulmonary venous flow systolic (cm/s)	-0.0439875	0.0204072	-2.15549	0.0284431	0.00362821	0.0313091	0.241178	0.0254031	FALSE	FALSE
LIFE-Heart	5347	C14OH	Septum (mm)	0.0172348	0.0105956	1.62659	0.00791263	0.00211944	0.103882	0.43037	0.0254031	FALSE	FALSE
LIFE-Heart	2359	C14OH	Tricuspid annular plane systolic excursion (mm)	0.0102659	0.0149469	0.686829	0.00313259	0.000110333	0.492259	0.794962	0.0254031	FALSE	FALSE
LIFE-Heart	5722	C14OH	NT-proBNP (pg/ml)	0.0362706	0.0117724	3.08097	0.00930183	0.00427444	0.00207309	0.0511016	0.0254031	FALSE	FALSE
LIFE-Adult	8928	C14OH	NT-proBNP (pg/ml)	0.00400724	0.0145866	0.27472	0.00316424	0.000181721	0.783538	0.915124	0.489307	FALSE	FALSE
LIFE-Heart	3003	C14OH	Number of plaques	0.00878992	0.0106786	0.823137	0.00767033	0.00136204	0.410496	0.776983	0.0254031	FALSE	FALSE
LIFE-Adult	8589	C14OH	Number of plaques	-0.00577406	0.00871013	-0.662913	0.0031993	0.000380556	0.507404	0.64694	0.489307	FALSE	FALSE
LIFE-Heart	3065	C14OH	Peripheral artery disease	0.0601807	0.044332	1.3575	0.00729681	0.00137898	0.174722	0.562995	0.0254031	FALSE	FALSE
LIFE-Adult	8139	C14OH	Peripheral artery disease	0.00728961	0.0370133	0.196946	0.00401737	2.31428e-05	0.843875	0.949544	0.489307	FALSE	FALSE
LIFE-Heart	5727	C14OH	Main stem stenosis	-0.0476617	0.0374698	-1.272	0.0079268	2.63815e-05	0.203424	0.588736	0.0254031	FALSE	FALSE
LIFE-Heart	5618	C14OH	CAD score	-0.0509883	0.0232675	-2.1914	0.00798349	9.31906e-05	0.028464	0.230045	0.0254031	FALSE	FALSE
LIFE-Heart	5561	C14OH	Valvular disease	0.0848561	0.045533	1.86362	0.00831265	0.00122947	0.0624283	0.342903	0.0254031	FALSE	FALSE
LIFE-Heart	3003	C14OH	Any plaques	0.0507603	0.0292952	1.73272	0.00844213	0.00241749	0.0832484	0.400906	0.0254031	FALSE	FALSE
LIFE-Adult	8589	C14OH	Any plaques	-0.0185155	0.0180149	-1.02779	0.00327102	0.00021791	0.304079	0.509341	0.489307	FALSE	FALSE
LIFE-Heart	3005	C16	Ankle brachial index	-0.0429297	0.0137967	-3.1116	0.10223	0.00321778	0.00187836	0.00647573	2.25451e-30	TRUE	FALSE
LIFE-Adult	8105	C16	Ankle brachial index	-0.00174133	0.0119271	-0.145998	0.123073	0.00128982	0.883927	0.920005	1.80657e-57	FALSE	FALSE
LIFE-Adult	8009	C16	Brachial-ankle pulse wave velocity	0.0320651	0.0138346	2.31775	0.125596	0.0271524	0.0204879	0.0360305	1.80657e-57	TRUE	FALSE
LIFE-Adult	3496	C16	Brachial-femoral pulse wave velocity	0.0141568	0.0172527	0.820554	0.131486	0.00249759	0.411956	0.4886	1.80657e-57	FALSE	FALSE
LIFE-Heart	5614	C16	Number of vessel disease (50% stenosis)	0.0118739	0.0129583	0.916319	0.0786777	0.00571795	0.359539	0.477724	2.25451e-30	FALSE	FALSE
LIFE-Adult	7666	C16	carotid-femoral pulse wave velocity	0.00408619	0.0110619	0.369393	0.124805	0.00201286	0.711845	0.761624	1.80657e-57	FALSE	FALSE
LIFE-Heart	2934	C16	Carotid intima media thickness	0.00808583	0.0190119	0.425305	0.101724	0.00694089	0.670646	0.768903	2.25451e-30	FALSE	FALSE
LIFE-Adult	8663	C16	Carotid intima media thickness	0.0128318	0.0126414	1.01506	0.120556	0.0153613	0.310105	0.398706	1.80657e-57	FALSE	FALSE
LIFE-Heart	4609	C16	Aortic bulb (mm)	0.00895132	0.0150231	0.595838	0.0815031	0.0122256	0.551313	0.66617	2.25451e-30	FALSE	FALSE
LIFE-Heart	1513	C16	Deceleration time (ms)	-0.0685382	0.0244262	-2.80593	0.115224	0.00277225	0.00508209	0.0145837	2.25451e-30	TRUE	FALSE
LIFE-Heart	960	C16	End-diastolic volume (biplane, ml)	0.0406132	0.0354244	1.14648	0.0944301	0.0216915	0.251889	0.362044	2.25451e-30	FALSE	FALSE
LIFE-Heart	1121	C16	Ejection Fraction (biplane, %)	-0.0473934	0.0291355	-1.62665	0.085044	0.00877861	0.104096	0.178192	2.25451e-30	FALSE	FALSE
LIFE-Heart	1279	C16	Ejection Fraction (%)	0.0287137	0.0297914	0.963826	0.082695	0.000889389	0.335318	0.454153	2.25451e-30	FALSE	FALSE
LIFE-Heart	428	C16	E point-septal separation (mm)	0.0877326	0.0439395	1.99667	0.126329	0.0147541	0.0465202	0.0936099	2.25451e-30	FALSE	FALSE
LIFE-Heart	966	C16	End-systolic volume (biplane, ml)	0.0655751	0.0328071	1.99881	0.0988863	0.0212718	0.0459137	0.09315	2.25451e-30	FALSE	FALSE
LIFE-Heart	1100	C16	Flow Propagation Velocity (cm/s)	0.0483944	0.0283456	1.7073	0.108084	0.00165356	0.0880525	0.157282	2.25451e-30	FALSE	FALSE
LIFE-Heart	4090	C16	Fractional shortening (%)	-0.0461424	0.014816	-3.11437	0.0880011	0.0090411	0.00185618	0.00645144	2.25451e-30	TRUE	FALSE
LIFE-Heart	965	C16	Left ventricular mass (g)	0.0720128	0.0348245	2.06788	0.102753	0.037227	0.038922	0.0816534	2.25451e-30	FALSE	FALSE
LIFE-Heart	2414	C16	Left ventricular function	0.0227638	0.0211294	1.07735	0.0576392	0.000927046	0.281432	0.396416	2.25451e-30	FALSE	FALSE
LIFE-Heart	5239	C16	Left ventricular internal diameter end diastole	0.0373128	0.0137168	2.72023	0.0832013	0.0136457	0.00654526	0.0177298	2.25451e-30	TRUE	FALSE
LIFE-Heart	4100	C16	Left ventricular internal diameter end systole	0.0678861	0.015312	4.43351	0.0879508	0.0201181	9.51469e-06	6.01377e-05	2.25451e-30	TRUE	FALSE
LIFE-Heart	4593	C16	Back wall (M-mode, mm)	0.0393101	0.0147941	2.65714	0.0797038	0.0161453	0.00790804	0.0207376	2.25451e-30	TRUE	FALSE
LIFE-Heart	1302	C16	Pulmonary venous flow diastolic (cm/s)	0.109114	0.0263329	4.14362	0.11728	0.0127182	3.64228e-05	0.000187046	2.25451e-30	TRUE	FALSE
LIFE-Heart	1302	C16	Pulmonary venous flow systolic (cm/s)	-0.0380538	0.0260144	-1.4628	0.106656	0.00216074	0.143768	0.227902	2.25451e-30	FALSE	FALSE
LIFE-Heart	5344	C16	Septum (mm)	0.0350384	0.0135046	2.59455	0.0830166	0.0146159	0.00949745	0.0243867	2.25451e-30	TRUE	FALSE
LIFE-Heart	2356	C16	Tricuspid annular plane systolic excursion (mm)	-0.0566488	0.0193246	-2.93144	0.0715602	0.00226507	0.0034067	0.0102409	2.25451e-30	TRUE	FALSE
LIFE-Heart	5718	C16	NT-proBNP (pg/ml)	0.116976	0.0149953	7.80082	0.0880059	0.00717733	7.26509e-15	1.8851e-13	2.25451e-30	TRUE	TRUE
LIFE-Adult	8927	C16	NT-proBNP (pg/ml)	0.0621327	0.0182642	3.40189	0.124308	0.000292708	0.000672159	0.00171401	1.80657e-57	TRUE	TRUE
LIFE-Heart	3003	C16	Number of plaques	0.0441303	0.0134257	3.287	0.102695	0.0153242	0.00102433	0.00385492	2.25451e-30	TRUE	FALSE
LIFE-Adult	8588	C16	Number of plaques	0.00135683	0.0109327	0.124107	0.122354	0.0131236	0.901233	0.925889	1.80657e-57	FALSE	FALSE
LIFE-Heart	3065	C16	Peripheral artery disease	0.195919	0.0556711	3.51922	0.105493	0.00620281	0.000439153	0.00176018	2.25451e-30	TRUE	FALSE
LIFE-Adult	8138	C16	Peripheral artery disease	0.0530684	0.0465146	1.1409	0.124262	0.000611634	0.253946	0.337858	1.80657e-57	FALSE	FALSE
LIFE-Heart	5723	C16	Main stem stenosis	0.128112	0.0479305	2.67287	0.0792622	0.00316551	0.00754183	0.020098	2.25451e-30	TRUE	FALSE
LIFE-Heart	5614	C16	CAD score	0.0137506	0.029756	0.462112	0.0785747	0.00303987	0.644019	0.747062	2.25451e-30	FALSE	FALSE
LIFE-Heart	5557	C16	Valvular disease	0.239217	0.0581918	4.11084	0.0826142	0.00259741	3.99929e-05	0.000201975	2.25451e-30	TRUE	FALSE
LIFE-Heart	3003	C16	Any plaques	0.0914189	0.0368745	2.47919	0.101298	0.0104427	0.013223	0.0329239	2.25451e-30	TRUE	FALSE
LIFE-Adult	8588	C16	Any plaques	-0.013132	0.0226055	-0.58092	0.122387	0.0105396	0.561309	0.622321	1.80657e-57	FALSE	FALSE
LIFE-Heart	3005	C16:1	Ankle brachial index	-0.0461172	0.0127701	-3.61135	0.0503737	0.00713412	0.000309616	0.0012827	9.87423e-12	TRUE	FALSE
LIFE-Adult	8106	C16:1	Ankle brachial index	-0.0121738	0.0114928	-1.05926	0.034652	0.000674845	0.289514	0.323326	1.2388e-10	FALSE	FALSE
LIFE-Adult	8010	C16:1	Brachial-ankle pulse wave velocity	0.0157467	0.0133396	1.18045	0.0343108	0.00657193	0.237856	0.268195	1.2388e-10	FALSE	FALSE
LIFE-Adult	3496	C16:1	Brachial-femoral pulse wave velocity	0.00345619	0.0162318	0.212927	0.045563	0.00318922	0.831396	0.859484	1.2388e-10	FALSE	FALSE
LIFE-Heart	5618	C16:1	Number of vessel disease (50% stenosis)	0.014718	0.0123399	1.19272	0.026052	0.00240306	0.233031	0.332147	9.87423e-12	FALSE	FALSE
LIFE-Adult	7667	C16:1	carotid-femoral pulse wave velocity	-0.00310551	0.0106317	-0.292099	0.0345912	0.00141103	0.770219	0.801656	1.2388e-10	FALSE	FALSE
LIFE-Heart	2934	C16:1	Carotid intima media thickness	-0.051842	0.0178556	-2.90339	0.0481176	5.2535e-05	0.00371914	0.0100193	9.87423e-12	TRUE	TRUE
LIFE-Adult	8664	C16:1	Carotid intima media thickness	-0.0358187	0.0121969	-2.93671	0.0353025	0.00245837	0.00332586	0.00503818	1.2388e-10	TRUE	TRUE
LIFE-Heart	4611	C16:1	Aortic bulb (mm)	-0.0208761	0.0142836	-1.46154	0.030076	3.98987e-05	0.143935	0.23039	9.87423e-12	FALSE	FALSE
LIFE-Heart	1513	C16:1	Deceleration time (ms)	-0.0613129	0.0219541	-2.79278	0.078062	0.00306324	0.00529221	0.013878	9.87423e-12	TRUE	FALSE
LIFE-Heart	960	C16:1	End-diastolic volume (biplane, ml)	0.0480782	0.0347757	1.38252	0.0229404	0.00099158	0.167138	0.257497	9.87423e-12	FALSE	FALSE
LIFE-Heart	1122	C16:1	Ejection Fraction (biplane, %)	-0.0876157	0.028115	-3.11634	0.0373727	0.012846	0.00187836	0.00529161	9.87423e-12	TRUE	FALSE
LIFE-Heart	1280	C16:1	Ejection Fraction (%)	-0.0673607	0.0287371	-2.34403	0.0186205	0.0077244	0.019231	0.0445111	9.87423e-12	TRUE	FALSE
LIFE-Heart	428	C16:1	E point-septal separation (mm)	0.0831164	0.0444052	1.87177	0.0114644	0.0107173	0.0619479	0.117916	9.87423e-12	FALSE	FALSE
LIFE-Heart	966	C16:1	End-systolic volume (biplane, ml)	0.0644029	0.0319626	2.01495	0.0301938	0.00375117	0.0441919	0.0896621	9.87423e-12	FALSE	FALSE
LIFE-Heart	1100	C16:1	Flow Propagation Velocity (cm/s)	0.0645187	0.0250707	2.57347	0.0915377	0.00440432	0.0102005	0.0248952	9.87423e-12	TRUE	FALSE
LIFE-Heart	4090	C16:1	Fractional shortening (%)	-0.0738124	0.0140257	-5.26267	0.0378352	0.00946044	1.49293e-07	2.37424e-06	9.87423e-12	TRUE	FALSE
LIFE-Heart	965	C16:1	Left ventricular mass (g)	0.107041	0.0341303	3.13625	0.0289506	0.00773393	0.00176396	0.00502676	9.87423e-12	TRUE	FALSE
LIFE-Heart	2418	C16:1	Left ventricular function	0.0504469	0.0204957	2.46134	0.016502	0.00341393	0.0139119	0.033294	9.87423e-12	TRUE	FALSE
LIFE-Heart	5242	C16:1	Left ventricular internal diameter end diastole	0.0181325	0.0130642	1.38795	0.0287516	0.00110424	0.165212	0.255328	9.87423e-12	FALSE	FALSE
LIFE-Heart	4101	C16:1	Left ventricular internal diameter end systole	0.0774129	0.0144693	5.35015	0.0380241	0.00963727	9.26969e-08	1.69258e-06	9.87423e-12	TRUE	FALSE
LIFE-Heart	4595	C16:1	Back wall (M-mode, mm)	0.00695431	0.0139593	0.498186	0.029703	0.00174565	0.618377	0.69922	9.87423e-12	FALSE	FALSE
LIFE-Heart	1302	C16:1	Pulmonary venous flow diastolic (cm/s)	0.0497214	0.0231818	2.14485	0.0774918	0.00541802	0.0321521	0.0692182	9.87423e-12	FALSE	FALSE
LIFE-Heart	1302	C16:1	Pulmonary venous flow systolic (cm/s)	-0.033389	0.0228971	-1.45822	0.0785866	0.00100316	0.145024	0.231381	9.87423e-12	FALSE	FALSE
LIFE-Heart	5347	C16:1	Septum (mm)	0.0276929	0.0128642	2.15271	0.0285433	0.00380938	0.031386	0.0681509	9.87423e-12	FALSE	FALSE
LIFE-Heart	2359	C16:1	Tricuspid annular plane systolic excursion (mm)	-0.0696459	0.01858	-3.74843	0.0194542	0.0061832	0.000182253	0.000831952	9.87423e-12	TRUE	FALSE
LIFE-Heart	5722	C16:1	NT-proBNP (pg/ml)	0.110521	0.0142725	7.74364	0.0357646	0.0159193	1.13566e-14	5.59879e-12	9.87423e-12	TRUE	TRUE
LIFE-Adult	8928	C16:1	NT-proBNP (pg/ml)	0.0385268	0.0176416	2.18386	0.0343668	0.00443242	0.0289987	0.0399712	1.2388e-10	TRUE	TRUE
LIFE-Heart	3003	C16:1	Number of plaques	0.0391343	0.0125392	3.12097	0.0506493	0.00809425	0.00181978	0.00515604	9.87423e-12	TRUE	FALSE
LIFE-Adult	8589	C16:1	Number of plaques	0.0208585	0.0105321	1.98048	0.0346544	0.00644984	0.0476816	0.0645601	1.2388e-10	FALSE	FALSE
LIFE-Heart	3065	C16:1	Peripheral artery disease	0.210097	0.0516793	4.06539	0.0515656	0.0081765	4.91651e-05	0.000327546	9.87423e-12	TRUE	FALSE
LIFE-Adult	8139	C16:1	Peripheral artery disease	0.0763896	0.0448429	1.70349	0.0345065	0.00130341	0.0885142	0.109215	1.2388e-10	FALSE	FALSE
LIFE-Heart	5727	C16:1	Main stem stenosis	0.12567	0.0456121	2.75518	0.0270511	0.0020453	0.00588459	0.015269	9.87423e-12	TRUE	FALSE
LIFE-Heart	5618	C16:1	CAD score	0.000916952	0.0283485	0.0323456	0.0258048	0.00110864	0.974198	0.974198	9.87423e-12	FALSE	FALSE
LIFE-Heart	5561	C16:1	Valvular disease	0.153243	0.0555336	2.75947	0.0280451	0.00190498	0.00580848	0.0151512	9.87423e-12	TRUE	FALSE
LIFE-Heart	3003	C16:1	Any plaques	0.0394194	0.0344614	1.14387	0.0479696	0.00273816	0.252768	0.351027	9.87423e-12	FALSE	FALSE
LIFE-Adult	8589	C16:1	Any plaques	0.0129132	0.0217884	0.592664	0.0342522	0.00466813	0.553422	0.600521	1.2388e-10	FALSE	FALSE
LIFE-Heart	3005	C16:1OH	Ankle brachial index	-0.00742725	0.0117714	-0.630956	0.0086142	0.000498193	0.528118	0.82685	3.28596e-06	FALSE	FALSE
LIFE-Adult	8106	C16:1OH	Ankle brachial index	0.00901069	0.0111259	0.809887	0.00781077	0.000497754	0.418029	0.78961	0.000761713	FALSE	FALSE
LIFE-Adult	8010	C16:1OH	Brachial-ankle pulse wave velocity	0.0127027	0.012893	0.98524	0.00800086	0.00259113	0.324536	0.730164	0.000761713	FALSE	FALSE
LIFE-Adult	3496	C16:1OH	Brachial-femoral pulse wave velocity	0.00112673	0.0156055	0.0722008	0.0107727	0.000318587	0.942446	0.980913	0.000761713	FALSE	FALSE
LIFE-Heart	5618	C16:1OH	Number of vessel disease (50% stenosis)	0.0112075	0.0111972	1.00092	0.011177	0.00103265	0.316908	0.762126	3.28596e-06	FALSE	FALSE
LIFE-Adult	7667	C16:1OH	carotid-femoral pulse wave velocity	-0.00635661	0.0103103	-0.616532	0.00811117	3.15231e-05	0.537562	0.858085	0.000761713	FALSE	FALSE
LIFE-Heart	2934	C16:1OH	Carotid intima media thickness	0.00195742	0.0163024	0.120069	0.0107972	0.00217747	0.904437	0.986476	3.28596e-06	FALSE	FALSE
LIFE-Adult	8664	C16:1OH	Carotid intima media thickness	0.0058954	0.0117624	0.501205	0.00865779	0.00232048	0.616239	0.881697	0.000761713	FALSE	FALSE
LIFE-Heart	4611	C16:1OH	Aortic bulb (mm)	0.0183457	0.0130153	1.40955	0.0112915	0.00138089	0.15874	0.617925	3.28596e-06	FALSE	FALSE
LIFE-Heart	1513	C16:1OH	Deceleration time (ms)	-0.00990496	0.0200721	-0.493468	0.0208857	0.000326292	0.621754	0.878307	3.28596e-06	FALSE	FALSE
LIFE-Heart	960	C16:1OH	End-diastolic volume (biplane, ml)	0.0400518	0.0321776	1.24471	0.00551353	0.000323906	0.213547	0.662129	3.28596e-06	FALSE	FALSE
LIFE-Heart	1122	C16:1OH	Ejection Fraction (biplane, %)	0.000732821	0.0258757	0.0283208	0.00837908	0.000198007	0.977411	0.992683	3.28596e-06	FALSE	FALSE
LIFE-Heart	1280	C16:1OH	Ejection Fraction (%)	-0.0238442	0.0265856	-0.896884	0.00142271	3.7191e-05	0.369952	0.797056	3.28596e-06	FALSE	FALSE
LIFE-Heart	428	C16:1OH	E point-septal separation (mm)	-0.0293387	0.0406424	-0.721874	-0.00134158	0.000204813	0.470783	0.811524	3.28596e-06	FALSE	FALSE
LIFE-Heart	966	C16:1OH	End-systolic volume (biplane, ml)	0.0243341	0.0298329	0.81568	0.00358495	0.000199032	0.414888	0.79857	3.28596e-06	FALSE	FALSE
LIFE-Heart	1100	C16:1OH	Flow Propagation Velocity (cm/s)	-0.0201903	0.0232654	-0.867825	0.0109338	0.000917231	0.385683	0.797056	3.28596e-06	FALSE	FALSE
LIFE-Heart	4090	C16:1OH	Fractional shortening (%)	-0.00997904	0.0129126	-0.772813	0.0114198	0.000464201	0.439678	0.79857	3.28596e-06	FALSE	FALSE
LIFE-Heart	965	C16:1OH	Left ventricular mass (g)	0.027666	0.0319262	0.86656	0.00378215	0.000966655	0.386402	0.797056	3.28596e-06	FALSE	FALSE
LIFE-Heart	2418	C16:1OH	Left ventricular function	0.0471947	0.0186733	2.52739	0.0163014	0.00235942	0.011555	0.132479	3.28596e-06	FALSE	FALSE
LIFE-Heart	5242	C16:1OH	Left ventricular internal diameter end diastole	0.0152464	0.0119056	1.2806	0.0128935	0.000542637	0.20039	0.649219	3.28596e-06	FALSE	FALSE
LIFE-Heart	4101	C16:1OH	Left ventricular internal diameter end systole	0.0258901	0.0133263	1.94278	0.0118376	0.00130462	0.0521112	0.361843	3.28596e-06	FALSE	FALSE
LIFE-Heart	4595	C16:1OH	Back wall (M-mode, mm)	0.0274476	0.0127758	2.14841	0.0106842	0.00256149	0.0317336	0.300859	3.28596e-06	FALSE	FALSE
LIFE-Heart	1302	C16:1OH	Pulmonary venous flow diastolic (cm/s)	0.00582413	0.0218748	0.266248	0.0187496	6.95788e-05	0.790091	0.95807	3.28596e-06	FALSE	FALSE
LIFE-Heart	1302	C16:1OH	Pulmonary venous flow systolic (cm/s)	0.00806927	0.0214548	0.376105	0.0197884	0.000319501	0.706901	0.931581	3.28596e-06	FALSE	FALSE
LIFE-Heart	5347	C16:1OH	Septum (mm)	0.00994731	0.0117157	0.849061	0.012634	0.00136058	0.395885	0.79857	3.28596e-06	FALSE	FALSE
LIFE-Heart	2359	C16:1OH	Tricuspid annular plane systolic excursion (mm)	0.0178261	0.0171042	1.04221	0.00884564	0.000279191	0.297424	0.753405	3.28596e-06	FALSE	FALSE
LIFE-Heart	5722	C16:1OH	NT-proBNP (pg/ml)	0.0410312	0.0129986	3.15658	0.0128805	0.00252465	0.00160464	0.034395	3.28596e-06	TRUE	FALSE
LIFE-Adult	8928	C16:1OH	NT-proBNP (pg/ml)	0.0182427	0.0170193	1.07188	0.00834297	0.00054773	0.283802	0.681607	0.000761713	FALSE	FALSE
LIFE-Heart	3003	C16:1OH	Number of plaques	-0.00530635	0.0114966	-0.461558	0.00899604	0.000453951	0.644432	0.894943	3.28596e-06	FALSE	FALSE
LIFE-Adult	8589	C16:1OH	Number of plaques	-0.0165228	0.010167	-1.62514	0.00910414	0.000412614	0.10417	0.312511	0.000761713	FALSE	FALSE
LIFE-Heart	3065	C16:1OH	Peripheral artery disease	0.0527817	0.0476617	1.10742	0.00973011	0.00104255	0.268198	0.72752	3.28596e-06	FALSE	FALSE
LIFE-Adult	8139	C16:1OH	Peripheral artery disease	-0.000187384	0.0434229	-0.00431534	0.00777644	3.6177e-07	0.996557	0.996557	0.000761713	FALSE	FALSE
LIFE-Heart	5727	C16:1OH	Main stem stenosis	0.00205837	0.0413973	0.0497224	0.0113091	0.000159124	0.960345	0.987457	3.28596e-06	FALSE	FALSE
LIFE-Heart	5618	C16:1OH	CAD score	-0.0343606	0.0257184	-1.33603	0.0113152	1.87962e-05	0.181592	0.634687	3.28596e-06	FALSE	FALSE
LIFE-Heart	5561	C16:1OH	Valvular disease	0.0976819	0.0505514	1.93233	0.0129116	0.00148332	0.0533701	0.365437	3.28596e-06	FALSE	FALSE
LIFE-Heart	3003	C16:1OH	Any plaques	-0.0113909	0.031552	-0.361021	0.00896859	0.00035881	0.718109	0.93788	3.28596e-06	FALSE	FALSE
LIFE-Adult	8589	C16:1OH	Any plaques	-0.0397078	0.0210277	-1.88836	0.009211	0.000279129	0.059012	0.196279	0.000761713	FALSE	FALSE
LIFE-Heart	3005	C16OH	Ankle brachial index	-0.0162118	0.010572	-1.53347	0.00505164	0.00190622	0.125266	0.835079	0.835079	FALSE	FALSE
LIFE-Adult	8106	C16OH	Ankle brachial index	-0.00324226	0.00914768	-0.354435	0.00273203	1.94104e-06	0.723022	0.982796	0.005171	FALSE	FALSE
LIFE-Adult	8010	C16OH	Brachial-ankle pulse wave velocity	-0.00254187	0.0106488	-0.238699	0.003339	0.00166598	0.811345	0.982796	0.005171	FALSE	FALSE
LIFE-Adult	3496	C16OH	Brachial-femoral pulse wave velocity	-0.0209562	0.0135033	-1.55193	0.00792573	6.06429e-06	0.120769	0.747184	0.005171	FALSE	FALSE
LIFE-Heart	5618	C16OH	Number of vessel disease (50% stenosis)	0.00697008	0.0097753	0.713029	0.00101866	0.000577548	0.475857	0.937384	0.835079	FALSE	FALSE
LIFE-Adult	7667	C16OH	carotid-femoral pulse wave velocity	0.00372827	0.0084713	0.440105	0.00272883	0.000446651	0.659873	0.982796	0.005171	FALSE	FALSE
LIFE-Heart	2934	C16OH	Carotid intima media thickness	-0.0284949	0.0146129	-1.94998	0.00535256	0.000143877	0.0512738	0.835079	0.835079	FALSE	FALSE
LIFE-Adult	8664	C16OH	Carotid intima media thickness	0.0118026	0.00971556	1.21482	0.0024941	0.0020469	0.224469	0.915692	0.005171	FALSE	FALSE
LIFE-Heart	4611	C16OH	Aortic bulb (mm)	-0.0072505	0.0112924	-0.642069	0.00252216	2.2905e-08	0.520861	0.95439	0.835079	FALSE	FALSE
LIFE-Heart	1513	C16OH	Deceleration time (ms)	-0.0140512	0.0188923	-0.743755	0.0130801	0.000224161	0.457142	0.937384	0.835079	FALSE	FALSE
LIFE-Heart	960	C16OH	End-diastolic volume (biplane, ml)	-0.00872331	0.0270943	-0.321961	-0.00544838	0.000338184	0.747554	0.95439	0.835079	FALSE	FALSE
LIFE-Heart	1122	C16OH	Ejection Fraction (biplane, %)	-0.0216594	0.0223677	-0.96833	-0.00445688	0.0017072	0.333091	0.920459	0.835079	FALSE	FALSE
LIFE-Heart	1280	C16OH	Ejection Fraction (%)	-0.00189755	0.0227453	-0.0834262	-0.000546288	0.000134078	0.933526	0.983006	0.835079	FALSE	FALSE
LIFE-Heart	428	C16OH	E point-septal separation (mm)	0.0122703	0.0338925	0.362036	-0.0059875	0.000246283	0.717511	0.95439	0.835079	FALSE	FALSE
LIFE-Heart	966	C16OH	End-systolic volume (biplane, ml)	0.0144954	0.02489	0.582379	-0.00883362	0.0012048	0.56045	0.95439	0.835079	FALSE	FALSE
LIFE-Heart	1100	C16OH	Flow Propagation Velocity (cm/s)	0.00231601	0.0216374	0.107037	0.0159551	0.000143422	0.914779	0.983006	0.835079	FALSE	FALSE
LIFE-Heart	4090	C16OH	Fractional shortening (%)	0.0056812	0.0112751	0.503871	0.00371988	4.49882e-05	0.614379	0.95439	0.835079	FALSE	FALSE
LIFE-Heart	965	C16OH	Left ventricular mass (g)	0.0361655	0.0268213	1.34839	-0.00482407	0.00539157	0.177857	0.835079	0.835079	FALSE	FALSE
LIFE-Heart	2418	C16OH	Left ventricular function	-0.00498242	0.0155671	-0.32006	-0.00037406	2.23547e-05	0.74895	0.95439	0.835079	FALSE	FALSE
LIFE-Heart	5242	C16OH	Left ventricular internal diameter end diastole	-0.0041509	0.0103313	-0.401779	0.00181216	2.07115e-05	0.687863	0.95439	0.835079	FALSE	FALSE
LIFE-Heart	4101	C16OH	Left ventricular internal diameter end systole	-0.000105474	0.0115166	-0.00915845	0.00351298	0.000181235	0.992693	0.994981	0.835079	FALSE	FALSE
LIFE-Heart	4595	C16OH	Back wall (M-mode, mm)	0.00651425	0.0111136	0.586153	0.00274736	0.000980634	0.557801	0.95439	0.835079	FALSE	FALSE
LIFE-Heart	1302	C16OH	Pulmonary venous flow diastolic (cm/s)	0.0218902	0.0202686	1.08001	0.0144759	0.00159422	0.280341	0.899013	0.835079	FALSE	FALSE
LIFE-Heart	1302	C16OH	Pulmonary venous flow systolic (cm/s)	0.00168418	0.0199529	0.0844081	0.0139409	1.67107e-05	0.932745	0.983006	0.835079	FALSE	FALSE
LIFE-Heart	5347	C16OH	Septum (mm)	0.0170521	0.0102458	1.6643	0.00224486	0.00147976	0.0961103	0.835079	0.835079	FALSE	FALSE
LIFE-Heart	2359	C16OH	Tricuspid annular plane systolic excursion (mm)	0.0103386	0.0143471	0.720604	0.000559497	0.00034216	0.471225	0.937384	0.835079	FALSE	FALSE
LIFE-Heart	5722	C16OH	NT-proBNP (pg/ml)	0.00900753	0.0113482	0.79374	0.00120416	0.000585225	0.42738	0.930294	0.835079	FALSE	FALSE
LIFE-Adult	8928	C16OH	NT-proBNP (pg/ml)	0.020294	0.0140631	1.44306	0.00285006	0.00106614	0.149038	0.786302	0.005171	FALSE	FALSE
LIFE-Heart	3003	C16OH	Number of plaques	0.011557	0.010338	1.11792	0.00431653	0.00173795	0.263691	0.899013	0.835079	FALSE	FALSE
LIFE-Adult	8589	C16OH	Number of plaques	0.0052266	0.00837806	0.623843	0.00256926	0.00141272	0.532747	0.982796	0.005171	FALSE	FALSE
LIFE-Heart	3065	C16OH	Peripheral artery disease	0.0340215	0.042809	0.794728	0.00487964	0.00104262	0.426834	0.930294	0.835079	FALSE	FALSE
LIFE-Adult	8139	C16OH	Peripheral artery disease	0.0310075	0.0357442	0.867484	0.00310456	0.000245782	0.385703	0.915692	0.005171	FALSE	FALSE
LIFE-Heart	5727	C16OH	Main stem stenosis	0.0736937	0.0361042	2.04114	0.00178022	0.00104071	0.0412832	0.835079	0.835079	FALSE	FALSE
LIFE-Heart	5618	C16OH	CAD score	0.00756865	0.0224548	0.337061	0.00094825	0.000259984	0.736084	0.95439	0.835079	FALSE	FALSE
LIFE-Heart	5561	C16OH	Valvular disease	0.0402894	0.0440357	0.914926	0.00154997	0.000250867	0.36027	0.920459	0.835079	FALSE	FALSE
LIFE-Heart	3003	C16OH	Any plaques	0.0264448	0.0283737	0.932021	0.0041895	0.00117453	0.351401	0.920459	0.835079	FALSE	FALSE
LIFE-Adult	8589	C16OH	Any plaques	-0.0257855	0.0173268	-1.48818	0.00278162	0.000267053	0.13674	0.747184	0.005171	FALSE	FALSE
LIFE-Heart	3005	C18	Ankle brachial index	-0.036049	0.012803	-2.81565	0.106136	0.0023262	0.00489971	0.0208238	2.66515e-42	TRUE	FALSE
LIFE-Adult	8101	C18	Ankle brachial index	-0.0131242	0.0119566	-1.09765	0.119099	0.00153518	0.27239	0.443358	1.329e-47	FALSE	FALSE
LIFE-Adult	8005	C18	Brachial-ankle pulse wave velocity	0.000704422	0.0138568	0.0508357	0.119529	0.0161406	0.959458	0.985215	1.329e-47	FALSE	FALSE
LIFE-Adult	3494	C18	Brachial-femoral pulse wave velocity	0.0130054	0.0172168	0.755393	0.133184	0.000335568	0.450065	0.631742	1.329e-47	FALSE	FALSE
LIFE-Heart	5616	C18	Number of vessel disease (50% stenosis)	-0.0192398	0.0120435	-1.59753	0.0886139	0.00112434	0.110204	0.244733	2.66515e-42	FALSE	FALSE
LIFE-Adult	7662	C18	carotid-femoral pulse wave velocity	0.00954225	0.0110416	0.864213	0.11896	0.000958979	0.387498	0.587002	1.329e-47	FALSE	FALSE
LIFE-Heart	2934	C18	Carotid intima media thickness	0.0193401	0.0176232	1.09743	0.106422	0.00808834	0.272546	0.464558	2.66515e-42	FALSE	FALSE
LIFE-Adult	8658	C18	Carotid intima media thickness	0.000232264	0.0126526	0.018357	0.115953	0.011029	0.985354	0.998406	1.329e-47	FALSE	FALSE
LIFE-Heart	4610	C18	Aortic bulb (mm)	0.0131164	0.0139887	0.937641	0.0846631	0.0112264	0.348478	0.552411	2.66515e-42	FALSE	FALSE
LIFE-Heart	1513	C18	Deceleration time (ms)	-0.0360657	0.0220752	-1.63376	0.123012	0.000586067	0.102519	0.231843	2.66515e-42	FALSE	FALSE
LIFE-Heart	960	C18	End-diastolic volume (biplane, ml)	0.0717577	0.0338833	2.11779	0.0709085	0.0181169	0.0344543	0.117958	2.66515e-42	FALSE	FALSE
LIFE-Heart	1122	C18	Ejection Fraction (biplane, %)	-0.05385	0.0277136	-1.94309	0.0734109	0.004905	0.0522587	0.156921	2.66515e-42	FALSE	FALSE
LIFE-Heart	1280	C18	Ejection Fraction (%)	-0.0331054	0.0277013	-1.19508	0.0740061	0.00363038	0.232279	0.419464	2.66515e-42	FALSE	FALSE
LIFE-Heart	428	C18	E point-septal separation (mm)	0.0530121	0.0418393	1.26704	0.0909127	0.00640322	0.205858	0.390339	2.66515e-42	FALSE	FALSE
LIFE-Heart	966	C18	End-systolic volume (biplane, ml)	0.0850377	0.0316463	2.68712	0.0695427	0.0186969	0.00733305	0.0296328	2.66515e-42	TRUE	FALSE
LIFE-Heart	1100	C18	Flow Propagation Velocity (cm/s)	0.0264801	0.0255197	1.03763	0.115746	7.71934e-05	0.299673	0.492463	2.66515e-42	FALSE	FALSE
LIFE-Heart	4089	C18	Fractional shortening (%)	-0.0490581	0.0138443	-3.54356	0.086951	0.00869788	0.000399201	0.00221131	2.66515e-42	TRUE	FALSE
LIFE-Heart	965	C18	Left ventricular mass (g)	0.0589673	0.0335869	1.75566	0.0778157	0.0231673	0.0794691	0.205222	2.66515e-42	FALSE	FALSE
LIFE-Heart	2416	C18	Left ventricular function	0.00851946	0.0196875	0.432735	0.0785179	0.000488182	0.665246	0.805814	2.66515e-42	FALSE	FALSE
LIFE-Heart	5241	C18	Left ventricular internal diameter end diastole	0.0273752	0.0127773	2.14249	0.0881643	0.0076182	0.0322003	0.113391	2.66515e-42	FALSE	FALSE
LIFE-Heart	4100	C18	Left ventricular internal diameter end systole	0.0604333	0.0142541	4.23973	0.0874332	0.0149472	2.28742e-05	0.000156625	2.66515e-42	TRUE	FALSE
LIFE-Heart	4594	C18	Back wall (M-mode, mm)	0.0291744	0.013713	2.1275	0.0859328	0.00782409	0.0334316	0.116892	2.66515e-42	FALSE	FALSE
LIFE-Heart	1302	C18	Pulmonary venous flow diastolic (cm/s)	0.0620784	0.0236432	2.62563	0.123595	0.00268631	0.00875148	0.0350771	2.66515e-42	TRUE	FALSE
LIFE-Heart	1302	C18	Pulmonary venous flow systolic (cm/s)	-0.0665375	0.0232823	-2.85786	0.123297	0.00564377	0.00433385	0.018742	2.66515e-42	TRUE	FALSE
LIFE-Heart	5345	C18	Septum (mm)	0.0196612	0.0126061	1.55965	0.0870792	0.00670746	0.118901	0.257729	2.66515e-42	FALSE	FALSE
LIFE-Heart	2358	C18	Tricuspid annular plane systolic excursion (mm)	-0.0496942	0.0180722	-2.74976	0.0896363	0.00203828	0.00600968	0.0244857	2.66515e-42	TRUE	FALSE
LIFE-Heart	5720	C18	NT-proBNP (pg/ml)	0.0654613	0.0139774	4.68337	0.091339	0.00166978	2.88734e-06	2.09332e-05	2.66515e-42	TRUE	TRUE
LIFE-Adult	8922	C18	NT-proBNP (pg/ml)	0.0432738	0.0183173	2.36245	0.117079	8.75473e-05	0.0181758	0.0391676	1.329e-47	TRUE	TRUE
LIFE-Heart	3003	C18	Number of plaques	0.0268258	0.012485	2.14864	0.102277	0.00885517	0.0317434	0.112586	2.66515e-42	FALSE	FALSE
LIFE-Adult	8583	C18	Number of plaques	-0.00196165	0.0109431	-0.17926	0.117086	0.00967754	0.857738	0.929178	1.329e-47	FALSE	FALSE
LIFE-Heart	3065	C18	Peripheral artery disease	0.17557	0.0515563	3.40541	0.108033	0.00493769	0.000669198	0.00350973	2.66515e-42	TRUE	FALSE
LIFE-Adult	8134	C18	Peripheral artery disease	0.0530126	0.046696	1.13527	0.119672	0.000162578	0.256295	0.421647	1.329e-47	FALSE	FALSE
LIFE-Heart	5725	C18	Main stem stenosis	-0.0326437	0.0445498	-0.732747	0.0877765	5.57098e-05	0.463743	0.662682	2.66515e-42	FALSE	FALSE
LIFE-Heart	5616	C18	CAD score	-0.0835552	0.0276517	-3.0217	0.089683	8.67997e-05	0.00252492	0.0115258	2.66515e-42	TRUE	FALSE
LIFE-Heart	5559	C18	Valvular disease	0.175436	0.0542251	3.23533	0.0892569	0.00126044	0.00122215	0.00614815	2.66515e-42	TRUE	FALSE
LIFE-Heart	3003	C18	Any plaques	0.0624764	0.0342716	1.82298	0.101889	0.00682556	0.0684068	0.185245	2.66515e-42	FALSE	FALSE
LIFE-Adult	8583	C18	Any plaques	-0.00499358	0.0226349	-0.220614	0.117087	0.00858466	0.825398	0.913955	1.329e-47	FALSE	FALSE
LIFE-Heart	3004	C18:1	Ankle brachial index	-0.0613482	0.0133819	-4.58442	0.129274	0.00812325	4.73952e-06	1.74372e-05	8.24954e-39	TRUE	FALSE
LIFE-Adult	8102	C18:1	Ankle brachial index	-0.0211065	0.0118807	-1.77654	0.120244	9.53314e-05	0.0756814	0.100689	6.21972e-32	FALSE	FALSE
LIFE-Adult	8006	C18:1	Brachial-ankle pulse wave velocity	0.0293662	0.0137805	2.131	0.120426	0.0261079	0.03312	0.0452442	6.21972e-32	TRUE	FALSE
LIFE-Adult	3495	C18:1	Brachial-femoral pulse wave velocity	0.00639208	0.0169174	0.377841	0.150065	0.0030066	0.705572	0.782264	6.21972e-32	FALSE	FALSE
LIFE-Heart	5617	C18:1	Number of vessel disease (50% stenosis)	0.0188121	0.01273	1.47778	0.0937821	0.00742868	0.139524	0.215627	8.24954e-39	FALSE	FALSE
LIFE-Adult	7663	C18:1	carotid-femoral pulse wave velocity	0.00612969	0.0110201	0.556227	0.120226	0.00267579	0.578072	0.648127	6.21972e-32	FALSE	FALSE
LIFE-Heart	2933	C18:1	Carotid intima media thickness	-0.0256666	0.0185676	-1.38233	0.124551	0.00446326	0.166976	0.25021	8.24954e-39	FALSE	FALSE
LIFE-Adult	8661	C18:1	Carotid intima media thickness	-0.0190559	0.0126419	-1.50736	0.118446	0.0113797	0.131754	0.170833	6.21972e-32	FALSE	FALSE
LIFE-Heart	4610	C18:1	Aortic bulb (mm)	-0.00764043	0.0147311	-0.518661	0.0926924	0.00758271	0.604022	0.695754	8.24954e-39	FALSE	FALSE
LIFE-Heart	1513	C18:1	Deceleration time (ms)	-0.0511221	0.0232386	-2.19988	0.141961	0.000885423	0.0279681	0.054499	8.24954e-39	FALSE	FALSE
LIFE-Heart	959	C18:1	End-diastolic volume (biplane, ml)	0.0908439	0.0350513	2.59174	0.106076	0.0270479	0.00969701	0.02106	8.24954e-39	TRUE	FALSE
LIFE-Heart	1121	C18:1	Ejection Fraction (biplane, %)	-0.0783062	0.0291449	-2.68679	0.0993231	0.0124015	0.0073226	0.016335	8.24954e-39	TRUE	FALSE
LIFE-Heart	1279	C18:1	Ejection Fraction (%)	-0.0833219	0.0294736	-2.827	0.106033	0.00934304	0.00477277	0.0108432	8.24954e-39	TRUE	FALSE
LIFE-Heart	427	C18:1	E point-septal separation (mm)	0.100437	0.0435755	2.30489	0.105916	0.0193922	0.0216716	0.0432555	8.24954e-39	TRUE	FALSE
LIFE-Heart	965	C18:1	End-systolic volume (biplane, ml)	0.102002	0.0324905	3.13944	0.115665	0.0266383	0.00174511	0.00435372	8.24954e-39	TRUE	FALSE
LIFE-Heart	1100	C18:1	Flow Propagation Velocity (cm/s)	0.0152074	0.0266606	0.570408	0.151681	6.2517e-05	0.568519	0.665775	8.24954e-39	FALSE	FALSE
LIFE-Heart	4089	C18:1	Fractional shortening (%)	-0.0719839	0.0144953	-4.96602	0.103574	0.0155575	7.11422e-07	2.78358e-06	8.24954e-39	TRUE	FALSE
LIFE-Heart	964	C18:1	Left ventricular mass (g)	0.0694534	0.0348502	1.99291	0.11109	0.0320559	0.0465575	0.0853266	8.24954e-39	FALSE	FALSE
LIFE-Heart	2418	C18:1	Left ventricular function	0.0502402	0.0208684	2.40747	0.0699865	0.00289471	0.0161384	0.0334295	8.24954e-39	TRUE	FALSE
LIFE-Heart	5241	C18:1	Left ventricular internal diameter end diastole	0.0293652	0.0134844	2.17772	0.0955448	0.0108493	0.0294714	0.0560981	8.24954e-39	FALSE	FALSE
LIFE-Heart	4100	C18:1	Left ventricular internal diameter end systole	0.080186	0.0150293	5.33533	0.101773	0.0236026	1.00546e-07	4.27319e-07	8.24954e-39	TRUE	FALSE
LIFE-Heart	4594	C18:1	Back wall (M-mode, mm)	0.0317367	0.0145192	2.18584	0.0952529	0.0161751	0.0288779	0.0556246	8.24954e-39	FALSE	FALSE
LIFE-Heart	1302	C18:1	Pulmonary venous flow diastolic (cm/s)	0.0934865	0.0248931	3.75552	0.145316	0.0101153	0.000180719	0.0005335	8.24954e-39	TRUE	FALSE
LIFE-Heart	1302	C18:1	Pulmonary venous flow systolic (cm/s)	-0.0551257	0.0245522	-2.24524	0.140029	0.00426695	0.0249219	0.049146	8.24954e-39	FALSE	FALSE
LIFE-Heart	5346	C18:1	Septum (mm)	0.0346824	0.0132727	2.61307	0.0962954	0.0165425	0.0089984	0.0196293	8.24954e-39	TRUE	FALSE
LIFE-Heart	2358	C18:1	Tricuspid annular plane systolic excursion (mm)	-0.0615231	0.019175	-3.20851	0.0716925	0.00340125	0.0013523	0.00349048	8.24954e-39	TRUE	FALSE
LIFE-Heart	5721	C18:1	NT-proBNP (pg/ml)	0.165448	0.0146576	11.2875	0.113499	0.0168296	3.08199e-29	3.79855e-27	8.24954e-39	TRUE	TRUE
LIFE-Adult	8924	C18:1	NT-proBNP (pg/ml)	0.109342	0.0182335	5.99676	0.122841	0.00174914	2.09125e-09	6.27374e-09	6.21972e-32	TRUE	TRUE
LIFE-Heart	3002	C18:1	Number of plaques	0.0510415	0.0130838	3.90114	0.122846	0.0194868	9.78547e-05	0.000301515	8.24954e-39	TRUE	FALSE
LIFE-Adult	8586	C18:1	Number of plaques	0.0152199	0.0109319	1.39224	0.119612	0.0144839	0.163884	0.203856	6.21972e-32	FALSE	FALSE
LIFE-Heart	3064	C18:1	Peripheral artery disease	0.230727	0.0540647	4.26761	0.127729	0.00953104	2.03601e-05	7.01924e-05	8.24954e-39	TRUE	FALSE
LIFE-Adult	8135	C18:1	Peripheral artery disease	0.0740836	0.0464145	1.59613	0.120156	0.000947857	0.110498	0.144498	6.21972e-32	FALSE	FALSE
LIFE-Heart	5726	C18:1	Main stem stenosis	0.113505	0.0471115	2.40929	0.0944916	0.00287829	0.0160149	0.0333136	8.24954e-39	TRUE	FALSE
LIFE-Heart	5617	C18:1	CAD score	0.00579545	0.0292477	0.198151	0.0934351	0.00311051	0.842934	0.897124	8.24954e-39	FALSE	FALSE
LIFE-Heart	5560	C18:1	Valvular disease	0.188104	0.0571238	3.29293	0.0981567	0.00185659	0.000997723	0.00261637	8.24954e-39	TRUE	FALSE
LIFE-Heart	3002	C18:1	Any plaques	0.0776564	0.0359746	2.15865	0.119748	0.0105762	0.030957	0.0584744	8.24954e-39	FALSE	FALSE
LIFE-Adult	8586	C18:1	Any plaques	0.0200698	0.0226131	0.887528	0.119493	0.0126396	0.374819	0.437766	6.21972e-32	FALSE	FALSE
LIFE-Heart	3005	C18:1OH	Ankle brachial index	-0.0122204	0.0103959	-1.17551	0.00889632	0.000900114	0.239886	0.739147	0.00245751	FALSE	FALSE
LIFE-Adult	8106	C18:1OH	Ankle brachial index	0.00104805	0.00913466	0.114734	0.00230023	3.68901e-05	0.908659	0.997731	0.274868	FALSE	FALSE
LIFE-Adult	8010	C18:1OH	Brachial-ankle pulse wave velocity	0.00573359	0.0106098	0.540405	0.00254897	0.00113516	0.588933	0.997731	0.274868	FALSE	FALSE
LIFE-Adult	3496	C18:1OH	Brachial-femoral pulse wave velocity	0.00360462	0.0134472	0.268057	0.00684883	0.000650843	0.788671	0.997731	0.274868	FALSE	FALSE
LIFE-Heart	5618	C18:1OH	Number of vessel disease (50% stenosis)	-0.00713645	0.00951913	-0.749696	0.00353557	4.46918e-05	0.453469	0.828215	0.00245751	FALSE	FALSE
LIFE-Adult	7667	C18:1OH	carotid-femoral pulse wave velocity	0.00616463	0.00846017	0.728665	0.002164	0.00025918	0.466229	0.97939	0.274868	FALSE	FALSE
LIFE-Heart	2934	C18:1OH	Carotid intima media thickness	-0.00199251	0.0143202	-0.13914	0.00810178	0.000775875	0.889349	0.978474	0.00245751	FALSE	FALSE
LIFE-Adult	8664	C18:1OH	Carotid intima media thickness	-0.00181209	0.00973572	-0.186128	0.00249461	0.000530276	0.852348	0.997731	0.274868	FALSE	FALSE
LIFE-Heart	4611	C18:1OH	Aortic bulb (mm)	0.0219337	0.0111316	1.9704	0.0050339	0.0024564	0.048852	0.46386	0.00245751	FALSE	FALSE
LIFE-Heart	1513	C18:1OH	Deceleration time (ms)	0.0092849	0.0186594	0.4976	0.01997	0.000308799	0.618839	0.86439	0.00245751	FALSE	FALSE
LIFE-Heart	960	C18:1OH	End-diastolic volume (biplane, ml)	0.00187907	0.0268718	0.0699273	-0.0111013	1.18604e-05	0.944266	0.984176	0.00245751	FALSE	FALSE
LIFE-Heart	1122	C18:1OH	Ejection Fraction (biplane, %)	0.00929913	0.0212986	0.436607	-0.00707686	0.000191812	0.662482	0.880333	0.00245751	FALSE	FALSE
LIFE-Heart	1280	C18:1OH	Ejection Fraction (%)	-0.000277382	0.0222341	-0.0124755	-0.00608552	4.28898e-07	0.990048	0.99611	0.00245751	FALSE	FALSE
LIFE-Heart	428	C18:1OH	E point-septal separation (mm)	-0.0126022	0.0318008	-0.396284	-0.0188453	0.000871612	0.692101	0.88615	0.00245751	FALSE	FALSE
LIFE-Heart	966	C18:1OH	End-systolic volume (biplane, ml)	-0.011971	0.0241555	-0.495581	-0.0108827	0.000432331	0.620305	0.86439	0.00245751	FALSE	FALSE
LIFE-Heart	1100	C18:1OH	Flow Propagation Velocity (cm/s)	-0.00135674	0.0213297	-0.063608	0.0146391	7.03286e-05	0.949294	0.984176	0.00245751	FALSE	FALSE
LIFE-Heart	4090	C18:1OH	Fractional shortening (%)	-0.00954218	0.0111019	-0.85951	0.00664116	0.00069522	0.39011	0.8282	0.00245751	FALSE	FALSE
LIFE-Heart	965	C18:1OH	Left ventricular mass (g)	0.0151225	0.0262927	0.575158	-0.00852172	0.000168767	0.565321	0.859964	0.00245751	FALSE	FALSE
LIFE-Heart	2418	C18:1OH	Left ventricular function	-0.0179867	0.0151699	-1.18568	-0.00368817	0.000811999	0.235866	0.739147	0.00245751	FALSE	FALSE
LIFE-Heart	5242	C18:1OH	Left ventricular internal diameter end diastole	0.00943987	0.0100959	0.93502	0.00373748	0.000704568	0.349821	0.826815	0.00245751	FALSE	FALSE
LIFE-Heart	4101	C18:1OH	Left ventricular internal diameter end systole	0.0116689	0.0114128	1.02243	0.00693602	0.00108936	0.306636	0.808403	0.00245751	FALSE	FALSE
LIFE-Heart	4595	C18:1OH	Back wall (M-mode, mm)	0.0201891	0.0109284	1.8474	0.00601717	0.00268335	0.064754	0.533388	0.00245751	FALSE	FALSE
LIFE-Heart	1302	C18:1OH	Pulmonary venous flow diastolic (cm/s)	0.0180359	0.0199925	0.902133	0.0144174	0.000852099	0.367155	0.8282	0.00245751	FALSE	FALSE
LIFE-Heart	1302	C18:1OH	Pulmonary venous flow systolic (cm/s)	0.00362438	0.019664	0.184315	0.0149784	9.24406e-06	0.853795	0.969864	0.00245751	FALSE	FALSE
LIFE-Heart	5347	C18:1OH	Septum (mm)	0.0254971	0.00998516	2.55349	0.00484638	0.00326451	0.0106924	0.251017	0.00245751	FALSE	FALSE
LIFE-Heart	2359	C18:1OH	Tricuspid annular plane systolic excursion (mm)	0.00566233	0.0140867	0.401961	-0.000561617	8.87604e-05	0.687749	0.88615	0.00245751	FALSE	FALSE
LIFE-Heart	5722	C18:1OH	NT-proBNP (pg/ml)	0.0163053	0.0110706	1.47284	0.00338057	0.000554823	0.14085	0.689285	0.00245751	FALSE	FALSE
LIFE-Adult	8928	C18:1OH	NT-proBNP (pg/ml)	-0.00391922	0.0140846	-0.278263	0.00244097	2.73391e-05	0.780817	0.997731	0.274868	FALSE	FALSE
LIFE-Heart	3003	C18:1OH	Number of plaques	0.00285388	0.010128	0.281783	0.00963859	0.00096324	0.77813	0.914229	0.00245751	FALSE	FALSE
LIFE-Adult	8589	C18:1OH	Number of plaques	0.00262505	0.0084237	0.311626	0.00257388	0.000694292	0.755332	0.997731	0.274868	FALSE	FALSE
LIFE-Heart	3065	C18:1OH	Peripheral artery disease	0.0536906	0.0419681	1.27932	0.00878084	0.00107471	0.200882	0.737781	0.00245751	FALSE	FALSE
LIFE-Adult	8139	C18:1OH	Peripheral artery disease	0.000248844	0.0356822	0.00697389	0.00222224	7.99246e-06	0.994436	0.997731	0.274868	FALSE	FALSE
LIFE-Heart	5727	C18:1OH	Main stem stenosis	0.0363481	0.0352217	1.03198	0.00324164	0.000344004	0.302125	0.805122	0.00245751	FALSE	FALSE
LIFE-Heart	5618	C18:1OH	CAD score	-0.0146583	0.0218658	-0.670375	0.00351553	1.58413e-05	0.502646	0.841542	0.00245751	FALSE	FALSE
LIFE-Heart	5561	C18:1OH	Valvular disease	0.0669324	0.0429813	1.55725	0.00347432	0.000491363	0.119469	0.663892	0.00245751	FALSE	FALSE
LIFE-Heart	3003	C18:1OH	Any plaques	0.00303786	0.0277958	0.109292	0.00961622	0.000589143	0.912978	0.978474	0.00245751	FALSE	FALSE
LIFE-Adult	8589	C18:1OH	Any plaques	0.00751608	0.017423	0.431389	0.00258423	0.000676521	0.666197	0.997731	0.274868	FALSE	FALSE
LIFE-Heart	3005	C18:2	Ankle brachial index	-0.0323149	0.0135986	-2.37634	0.0597609	0.0011503	0.0175479	0.0652212	3.70188e-12	FALSE	FALSE
LIFE-Adult	8106	C18:2	Ankle brachial index	-0.0152716	0.0122022	-1.25155	0.0604109	0.000467183	0.210771	0.322479	3.68479e-24	FALSE	FALSE
LIFE-Adult	8010	C18:2	Brachial-ankle pulse wave velocity	-0.00493707	0.0141495	-0.348923	0.061078	0.0103493	0.727156	0.794678	3.68479e-24	FALSE	FALSE
LIFE-Adult	3496	C18:2	Brachial-femoral pulse wave velocity	0.0225329	0.0171934	1.31055	0.0899582	0.00242452	0.190096	0.299842	3.68479e-24	FALSE	FALSE
LIFE-Heart	5618	C18:2	Number of vessel disease (50% stenosis)	0.00314736	0.0129317	0.243382	0.0381371	0.00187477	0.807718	0.863415	3.70188e-12	FALSE	FALSE
LIFE-Adult	7667	C18:2	carotid-femoral pulse wave velocity	-0.00772849	0.0113235	-0.682519	0.0591107	0.000293139	0.494932	0.615647	3.68479e-24	FALSE	FALSE
LIFE-Heart	2934	C18:2	Carotid intima media thickness	0.00299531	0.0187875	0.15943	0.0540431	0.00370222	0.873341	0.902635	3.70188e-12	FALSE	FALSE
LIFE-Adult	8664	C18:2	Carotid intima media thickness	-0.0108187	0.0129655	-0.83442	0.058502	0.00620927	0.404067	0.542301	3.68479e-24	FALSE	FALSE
LIFE-Heart	4611	C18:2	Aortic bulb (mm)	-0.0121949	0.0148472	-0.821364	0.0398819	0.0038263	0.411482	0.551252	3.70188e-12	FALSE	FALSE
LIFE-Heart	1513	C18:2	Deceleration time (ms)	-0.0212854	0.0237041	-0.897966	0.0723144	3.11501e-05	0.369348	0.515832	3.70188e-12	FALSE	FALSE
LIFE-Heart	960	C18:2	End-diastolic volume (biplane, ml)	0.0305446	0.0358777	0.851355	0.0209234	0.00637048	0.394788	0.533253	3.70188e-12	FALSE	FALSE
LIFE-Heart	1122	C18:2	Ejection Fraction (biplane, %)	-0.0449783	0.0294065	-1.52953	0.0145716	0.00381278	0.126419	0.272776	3.70188e-12	FALSE	FALSE
LIFE-Heart	1280	C18:2	Ejection Fraction (%)	0.0178289	0.0300976	0.59237	0.0304999	0.00057252	0.553709	0.674021	3.70188e-12	FALSE	FALSE
LIFE-Heart	428	C18:2	E point-septal separation (mm)	0.0537674	0.0454982	1.18175	0.0170876	0.00650715	0.237989	0.404356	3.70188e-12	FALSE	FALSE
LIFE-Heart	966	C18:2	End-systolic volume (biplane, ml)	0.031101	0.0333097	0.933692	0.018328	0.00442407	0.3507	0.505169	3.70188e-12	FALSE	FALSE
LIFE-Heart	1100	C18:2	Flow Propagation Velocity (cm/s)	-0.00469566	0.0267546	-0.175509	0.0911943	6.76542e-05	0.860713	0.899007	3.70188e-12	FALSE	FALSE
LIFE-Heart	4090	C18:2	Fractional shortening (%)	-0.0533474	0.0146288	-3.64675	0.0462497	0.00693922	0.000268896	0.00221919	3.70188e-12	TRUE	FALSE
LIFE-Heart	965	C18:2	Left ventricular mass (g)	0.00047183	0.0355559	0.0132701	0.0231394	0.00526218	0.989415	0.989415	3.70188e-12	FALSE	FALSE
LIFE-Heart	2418	C18:2	Left ventricular function	0.0320785	0.0213723	1.50094	0.0212957	0.000821897	0.133503	0.280689	3.70188e-12	FALSE	FALSE
LIFE-Heart	5242	C18:2	Left ventricular internal diameter end diastole	0.0228319	0.0136229	1.67599	0.0383909	0.0054886	0.0937993	0.226312	3.70188e-12	FALSE	FALSE
LIFE-Heart	4101	C18:2	Left ventricular internal diameter end systole	0.0457805	0.0151693	3.01797	0.0442946	0.00888283	0.00256043	0.0140255	3.70188e-12	TRUE	FALSE
LIFE-Heart	4595	C18:2	Back wall (M-mode, mm)	0.0175072	0.0145611	1.20233	0.0439301	0.00645911	0.229299	0.397982	3.70188e-12	FALSE	FALSE
LIFE-Heart	1302	C18:2	Pulmonary venous flow diastolic (cm/s)	0.0318011	0.0251624	1.26383	0.0740735	0.00141512	0.20652	0.381327	3.70188e-12	FALSE	FALSE
LIFE-Heart	1302	C18:2	Pulmonary venous flow systolic (cm/s)	-0.0487607	0.0247364	-1.97121	0.0758685	0.00323845	0.0489143	0.139317	3.70188e-12	FALSE	FALSE
LIFE-Heart	5347	C18:2	Septum (mm)	0.00395765	0.0134725	0.293757	0.0390516	0.00379167	0.768955	0.842433	3.70188e-12	FALSE	FALSE
LIFE-Heart	2359	C18:2	Tricuspid annular plane systolic excursion (mm)	-0.05271	0.0193149	-2.72899	0.0201299	0.00272363	0.00640044	0.0297681	3.70188e-12	TRUE	FALSE
LIFE-Heart	5722	C18:2	NT-proBNP (pg/ml)	0.0806002	0.0149912	5.37651	0.0416552	0.00270611	7.89648e-08	1.60555e-06	3.70188e-12	TRUE	FALSE
LIFE-Adult	8928	C18:2	NT-proBNP (pg/ml)	0.0370127	0.0187721	1.97168	0.0589316	0.000120866	0.0486769	0.131224	3.68479e-24	FALSE	FALSE
LIFE-Heart	3003	C18:2	Number of plaques	0.0188104	0.0132133	1.42359	0.0552335	0.00476519	0.15467	0.312346	3.70188e-12	FALSE	FALSE
LIFE-Adult	8589	C18:2	Number of plaques	0.0100611	0.0112168	0.896966	0.0595536	0.00798399	0.369762	0.509672	3.68479e-24	FALSE	FALSE
LIFE-Heart	3065	C18:2	Peripheral artery disease	0.153371	0.054823	2.79756	0.0608134	0.00301521	0.00518128	0.0247997	3.70188e-12	TRUE	FALSE
LIFE-Adult	8139	C18:2	Peripheral artery disease	0.0421243	0.0476258	0.884486	0.061349	0.000193863	0.37646	0.514272	3.68479e-24	FALSE	FALSE
LIFE-Heart	5727	C18:2	Main stem stenosis	-0.00421227	0.047831	-0.0880656	0.0367959	0.00028118	0.929828	0.939787	3.70188e-12	FALSE	FALSE
LIFE-Heart	5618	C18:2	CAD score	0.0425302	0.0296992	1.43203	0.038479	0.00184917	0.15219	0.311326	3.70188e-12	FALSE	FALSE
LIFE-Heart	5561	C18:2	Valvular disease	0.118232	0.0581066	2.03474	0.039436	0.000920541	0.0419249	0.122302	3.70188e-12	FALSE	FALSE
LIFE-Heart	3003	C18:2	Any plaques	0.0637431	0.0362566	1.75811	0.0555699	0.0048581	0.0788313	0.195409	3.70188e-12	FALSE	FALSE
LIFE-Adult	8589	C18:2	Any plaques	0.00227451	0.0232012	0.098034	0.0594664	0.0059915	0.921908	0.946657	3.68479e-24	FALSE	FALSE
LIFE-Heart	3005	C18:2OH	Ankle brachial index	-0.00476606	0.0101653	-0.468856	0.00329261	0.000258509	0.639206	0.901379	0.365339	FALSE	FALSE
LIFE-Adult	8106	C18:2OH	Ankle brachial index	-0.00979081	0.00909377	-1.07665	0.000872279	0.000101772	0.281669	0.979439	0.255418	FALSE	FALSE
LIFE-Adult	8010	C18:2OH	Brachial-ankle pulse wave velocity	0.0133176	0.0105781	1.25898	0.000915204	0.00144993	0.208074	0.864057	0.255418	FALSE	FALSE
LIFE-Adult	3496	C18:2OH	Brachial-femoral pulse wave velocity	-0.0246387	0.0135172	-1.82277	0.000968645	6.96515e-05	0.0684236	0.574787	0.255418	FALSE	FALSE
LIFE-Heart	5618	C18:2OH	Number of vessel disease (50% stenosis)	-0.00857248	0.00924946	-0.926809	0.00226938	3.7161e-07	0.354066	0.864654	0.365339	FALSE	FALSE
LIFE-Adult	7667	C18:2OH	carotid-femoral pulse wave velocity	0.0133645	0.00847982	1.57604	0.00108779	0.000880629	0.115058	0.704156	0.255418	FALSE	FALSE
LIFE-Heart	2934	C18:2OH	Carotid intima media thickness	-0.0109705	0.0140649	-0.779994	0.00270431	0.000370874	0.435458	0.901379	0.365339	FALSE	FALSE
LIFE-Adult	8664	C18:2OH	Carotid intima media thickness	0.00725914	0.00956846	0.758653	0.000474677	0.000869231	0.448081	0.987454	0.255418	FALSE	FALSE
LIFE-Heart	4611	C18:2OH	Aortic bulb (mm)	-0.00363075	0.0109335	-0.332076	0.00203836	2.67128e-05	0.739847	0.911609	0.365339	FALSE	FALSE
LIFE-Heart	1513	C18:2OH	Deceleration time (ms)	-0.000893768	0.018447	-0.0484504	0.00606723	0.000161408	0.961364	0.985348	0.365339	FALSE	FALSE
LIFE-Heart	960	C18:2OH	End-diastolic volume (biplane, ml)	0.0309761	0.0259233	1.19491	0.00473702	0.0025871	0.232421	0.81305	0.365339	FALSE	FALSE
LIFE-Heart	1122	C18:2OH	Ejection Fraction (biplane, %)	-0.000684932	0.0209316	-0.0327224	0.00268385	0.000247009	0.973902	0.989966	0.365339	FALSE	FALSE
LIFE-Heart	1280	C18:2OH	Ejection Fraction (%)	-0.0149681	0.0210391	-0.711442	0.00149354	0.000325273	0.476942	0.901379	0.365339	FALSE	FALSE
LIFE-Heart	428	C18:2OH	E point-septal separation (mm)	0.0174255	0.0310491	0.561225	0.0185802	0.00101177	0.57495	0.901379	0.365339	FALSE	FALSE
LIFE-Heart	966	C18:2OH	End-systolic volume (biplane, ml)	0.0305738	0.0238845	1.28007	0.00288959	0.00310794	0.200834	0.811567	0.365339	FALSE	FALSE
LIFE-Heart	1100	C18:2OH	Flow Propagation Velocity (cm/s)	0.000605308	0.0211152	0.0286669	0.00322399	1.78546e-05	0.977136	0.990731	0.365339	FALSE	FALSE
LIFE-Heart	4090	C18:2OH	Fractional shortening (%)	-0.0106135	0.0108296	-0.980052	0.00242291	0.00062408	0.327119	0.864654	0.365339	FALSE	FALSE
LIFE-Heart	965	C18:2OH	Left ventricular mass (g)	0.0280746	0.0256605	1.09408	0.00446097	0.00347509	0.274198	0.850187	0.365339	FALSE	FALSE
LIFE-Heart	2418	C18:2OH	Left ventricular function	-0.00874157	0.01439	-0.607477	0.00137428	4.01077e-05	0.543592	0.901379	0.365339	FALSE	FALSE
LIFE-Heart	5242	C18:2OH	Left ventricular internal diameter end diastole	0.0147088	0.0098574	1.49215	0.00227847	0.000676647	0.135719	0.691231	0.365339	FALSE	FALSE
LIFE-Heart	4101	C18:2OH	Left ventricular internal diameter end systole	0.0102805	0.0110694	0.928733	0.00222056	0.000643751	0.353082	0.864654	0.365339	FALSE	FALSE
LIFE-Heart	4595	C18:2OH	Back wall (M-mode, mm)	0.00804891	0.0105849	0.760413	0.00218938	0.000817383	0.447047	0.901379	0.365339	FALSE	FALSE
LIFE-Heart	1302	C18:2OH	Pulmonary venous flow diastolic (cm/s)	-0.00964247	0.0197282	-0.488767	0.00863134	0.000269283	0.62509	0.901379	0.365339	FALSE	FALSE
LIFE-Heart	1302	C18:2OH	Pulmonary venous flow systolic (cm/s)	-0.0234219	0.0193967	-1.20752	0.00911692	0.000949107	0.227453	0.812568	0.365339	FALSE	FALSE
LIFE-Heart	5347	C18:2OH	Septum (mm)	0.002382	0.00973385	0.244713	0.00190488	0.000300342	0.806688	0.926662	0.365339	FALSE	FALSE
LIFE-Heart	2359	C18:2OH	Tricuspid annular plane systolic excursion (mm)	-0.000847064	0.013428	-0.0630817	0.00197582	4.06276e-05	0.949707	0.975428	0.365339	FALSE	FALSE
LIFE-Heart	5722	C18:2OH	NT-proBNP (pg/ml)	0.0080603	0.0107423	0.75033	0.00244071	0.000543352	0.453087	0.901379	0.365339	FALSE	FALSE
LIFE-Adult	8928	C18:2OH	NT-proBNP (pg/ml)	0.00893092	0.0139027	0.642386	0.00033007	0.000207881	0.520639	0.987454	0.255418	FALSE	FALSE
LIFE-Heart	3003	C18:2OH	Number of plaques	-0.00675092	0.00986623	-0.684245	0.00255398	8.57391e-05	0.493874	0.901379	0.365339	FALSE	FALSE
LIFE-Adult	8589	C18:2OH	Number of plaques	-0.00454962	0.00827399	-0.549871	0.000344445	0.000181497	0.582423	0.987454	0.255418	FALSE	FALSE
LIFE-Heart	3065	C18:2OH	Peripheral artery disease	0.00144018	0.0410193	0.0351098	0.00243376	0.000150214	0.971995	0.989966	0.365339	FALSE	FALSE
LIFE-Adult	8139	C18:2OH	Peripheral artery disease	-0.0295681	0.035468	-0.833655	0.000712232	3.4613e-05	0.4045	0.987454	0.255418	FALSE	FALSE
LIFE-Heart	5727	C18:2OH	Main stem stenosis	-0.0180754	0.0341689	-0.529002	0.0023396	4.43301e-06	0.596825	0.901379	0.365339	FALSE	FALSE
LIFE-Heart	5618	C18:2OH	CAD score	-0.0145062	0.0212469	-0.682744	0.00219941	1.23117e-06	0.494797	0.901379	0.365339	FALSE	FALSE
LIFE-Heart	5561	C18:2OH	Valvular disease	0.0380756	0.0416275	0.914674	0.00202126	0.000269524	0.360403	0.864654	0.365339	FALSE	FALSE
LIFE-Heart	3003	C18:2OH	Any plaques	-0.0226883	0.0270761	-0.837945	0.00263211	7.8118e-06	0.402129	0.901379	0.365339	FALSE	FALSE
LIFE-Adult	8589	C18:2OH	Any plaques	0.00360167	0.0171137	0.210456	0.00031435	0.000409275	0.833317	0.987454	0.255418	FALSE	FALSE
LIFE-Heart	3005	C18OH	Ankle brachial index	0.00812634	0.00952577	0.85309	-0.00152089	5.34548e-05	0.393678	0.856082	0.620481	FALSE	FALSE
LIFE-Adult	8106	C18OH	Ankle brachial index	0.00113806	0.00822623	0.138346	0.00494311	2.60897e-05	0.889971	0.987208	0.190169	FALSE	FALSE
LIFE-Adult	8010	C18OH	Brachial-ankle pulse wave velocity	-0.00729355	0.0095323	-0.76514	0.00527014	0.00113703	0.444211	0.747715	0.190169	FALSE	FALSE
LIFE-Adult	3496	C18OH	Brachial-femoral pulse wave velocity	-0.0152657	0.0126769	-1.20421	0.00478451	2.49652e-05	0.228589	0.747715	0.190169	FALSE	FALSE
LIFE-Heart	5618	C18OH	Number of vessel disease (50% stenosis)	0.015086	0.00842743	1.7901	0.00207897	0.00109147	0.0734911	0.721663	0.620481	FALSE	FALSE
LIFE-Adult	7667	C18OH	carotid-femoral pulse wave velocity	5.36846e-05	0.00761775	0.00704731	0.00546528	0.000134956	0.994377	0.995542	0.190169	FALSE	FALSE
LIFE-Heart	2934	C18OH	Carotid intima media thickness	0.00283228	0.0132315	0.214056	-0.000447802	0.000192399	0.830519	0.973661	0.620481	FALSE	FALSE
LIFE-Adult	8664	C18OH	Carotid intima media thickness	-0.00721451	0.00879754	-0.82006	0.00440503	0.00061006	0.412205	0.747715	0.190169	FALSE	FALSE
LIFE-Heart	4611	C18OH	Aortic bulb (mm)	-0.000991092	0.00999589	-0.0991499	0.00227076	1.11759e-05	0.921024	0.992782	0.620481	FALSE	FALSE
LIFE-Heart	1513	C18OH	Deceleration time (ms)	-0.00261433	0.0180122	-0.145142	-0.00070404	3.46096e-06	0.884618	0.992782	0.620481	FALSE	FALSE
LIFE-Heart	960	C18OH	End-diastolic volume (biplane, ml)	0.00121602	0.0213264	0.0570194	-0.00257283	4.41343e-06	0.954542	0.992782	0.620481	FALSE	FALSE
LIFE-Heart	1122	C18OH	Ejection Fraction (biplane, %)	-0.0063175	0.0169015	-0.373785	-0.00273439	0.000116286	0.708636	0.958558	0.620481	FALSE	FALSE
LIFE-Heart	1280	C18OH	Ejection Fraction (%)	-0.000457395	0.018715	-0.0244401	-0.00405389	3.30197e-05	0.980505	0.997168	0.620481	FALSE	FALSE
LIFE-Heart	428	C18OH	E point-septal separation (mm)	0.00660125	0.0246139	0.268192	0.00359772	2.31093e-05	0.788686	0.973661	0.620481	FALSE	FALSE
LIFE-Heart	966	C18OH	End-systolic volume (biplane, ml)	0.000379607	0.0202294	0.0187651	-0.00536122	6.28241e-06	0.985032	0.997168	0.620481	FALSE	FALSE
LIFE-Heart	1100	C18OH	Flow Propagation Velocity (cm/s)	0.0328042	0.0207971	1.57735	0.0048317	0.00241732	0.115007	0.811062	0.620481	FALSE	FALSE
LIFE-Heart	4090	C18OH	Fractional shortening (%)	0.00482249	0.0100633	0.479215	0.00332845	1.51309e-05	0.631811	0.940078	0.620481	FALSE	FALSE
LIFE-Heart	965	C18OH	Left ventricular mass (g)	-0.0185638	0.0224021	-0.828665	-0.00133662	2.95424e-05	0.407503	0.856082	0.620481	FALSE	FALSE
LIFE-Heart	2418	C18OH	Left ventricular function	0.0020618	0.012714	0.162167	-0.00117479	8.60863e-09	0.871188	0.989621	0.620481	FALSE	FALSE
LIFE-Heart	5242	C18OH	Left ventricular internal diameter end diastole	0.0196908	0.00901876	2.18332	0.0021354	0.000811647	0.0290567	0.651134	0.620481	FALSE	FALSE
LIFE-Heart	4101	C18OH	Left ventricular internal diameter end systole	0.0083887	0.0102916	0.815102	0.00316319	0.000412758	0.415061	0.856082	0.620481	FALSE	FALSE
LIFE-Heart	4595	C18OH	Back wall (M-mode, mm)	-0.00255039	0.00988288	-0.258061	0.00272232	8.15682e-05	0.796371	0.973661	0.620481	FALSE	FALSE
LIFE-Heart	1302	C18OH	Pulmonary venous flow diastolic (cm/s)	0.0263111	0.0192932	1.36375	-0.00123804	0.00183667	0.172885	0.811062	0.620481	FALSE	FALSE
LIFE-Heart	1302	C18OH	Pulmonary venous flow systolic (cm/s)	-0.00732557	0.019006	-0.385436	-0.00255811	6.41174e-05	0.699979	0.958558	0.620481	FALSE	FALSE
LIFE-Heart	5347	C18OH	Septum (mm)	-0.0010658	0.00894633	-0.119133	0.00180603	4.28233e-05	0.905175	0.992782	0.620481	FALSE	FALSE
LIFE-Heart	2359	C18OH	Tricuspid annular plane systolic excursion (mm)	0.0134682	0.011438	1.1775	0.0029244	0.000625283	0.239117	0.856082	0.620481	FALSE	FALSE
LIFE-Heart	5722	C18OH	NT-proBNP (pg/ml)	0.0108096	0.00979935	1.1031	0.00176887	0.000998338	0.270032	0.856082	0.620481	FALSE	FALSE
LIFE-Adult	8928	C18OH	NT-proBNP (pg/ml)	0.0157084	0.0127357	1.23342	0.00448348	0.000440433	0.217453	0.747715	0.190169	FALSE	FALSE
LIFE-Heart	3003	C18OH	Number of plaques	0.000434622	0.00934234	0.0465218	-0.000405378	0.000132468	0.962898	0.992782	0.620481	FALSE	FALSE
LIFE-Adult	8589	C18OH	Number of plaques	-0.000246312	0.00760295	-0.0323969	0.00426601	0.000968028	0.974156	0.993639	0.190169	FALSE	FALSE
LIFE-Heart	3065	C18OH	Peripheral artery disease	-0.020889	0.038548	-0.541896	-0.00140181	2.84391e-05	0.58793	0.919343	0.620481	FALSE	FALSE
LIFE-Adult	8139	C18OH	Peripheral artery disease	-0.0173607	0.0320863	-0.541063	0.00492373	5.64863e-08	0.588479	0.882719	0.190169	FALSE	FALSE
LIFE-Heart	5727	C18OH	Main stem stenosis	0.00706341	0.0312249	0.226211	0.00146378	2.86807e-05	0.821046	0.973661	0.620481	FALSE	FALSE
LIFE-Heart	5618	C18OH	CAD score	0.034693	0.0193579	1.79218	0.0020803	0.00112131	0.0731575	0.721663	0.620481	FALSE	FALSE
LIFE-Heart	5561	C18OH	Valvular disease	0.0850117	0.0382164	2.22448	0.00253268	0.00101612	0.0261562	0.651134	0.620481	FALSE	FALSE
LIFE-Heart	3003	C18OH	Any plaques	-0.0175992	0.0256374	-0.686465	-0.000248249	7.55999e-06	0.492473	0.882569	0.620481	FALSE	FALSE
LIFE-Adult	8589	C18OH	Any plaques	-0.00326344	0.0157255	-0.207526	0.00427089	0.0007394	0.835604	0.987208	0.190169	FALSE	FALSE
LIFE-Heart	3005	C2	Ankle brachial index	-0.0650264	0.0123146	-5.28045	0.116074	0.0166143	1.38105e-07	6.36315e-07	4.48872e-23	TRUE	TRUE
LIFE-Adult	8106	C2	Ankle brachial index	-0.0397348	0.0104651	-3.79688	0.136405	0.00144504	0.000147603	0.000191384	1.38617e-25	TRUE	TRUE
LIFE-Adult	8010	C2	Brachial-ankle pulse wave velocity	0.0338683	0.0121262	2.79299	0.136825	0.0418462	0.00523473	0.00611384	1.38617e-25	TRUE	FALSE
LIFE-Adult	3496	C2	Brachial-femoral pulse wave velocity	0.0261996	0.0149016	1.75818	0.175135	0.0124572	0.0788053	0.0867425	1.38617e-25	FALSE	FALSE
LIFE-Heart	5618	C2	Number of vessel disease (50% stenosis)	0.0186943	0.0114695	1.62991	0.0802215	0.011738	0.103177	0.127484	4.48872e-23	FALSE	FALSE
LIFE-Adult	7667	C2	carotid-femoral pulse wave velocity	0.0153089	0.00967871	1.58171	0.134602	0.00749166	0.113758	0.12257	1.38617e-25	FALSE	FALSE
LIFE-Heart	2934	C2	Carotid intima media thickness	-0.0279828	0.0170373	-1.64244	0.107802	0.00334429	0.100607	0.124935	4.48872e-23	FALSE	FALSE
LIFE-Adult	8664	C2	Carotid intima media thickness	-0.0102522	0.0111292	-0.921192	0.130827	0.0225659	0.356976	0.366559	1.38617e-25	FALSE	FALSE
LIFE-Heart	4611	C2	Aortic bulb (mm)	0.00978828	0.013409	0.729978	0.0837014	0.00410405	0.465441	0.504313	4.48872e-23	FALSE	FALSE
LIFE-Heart	1513	C2	Deceleration time (ms)	-0.0286963	0.021912	-1.30962	0.133898	9.21522e-06	0.190527	0.222582	4.48872e-23	FALSE	FALSE
LIFE-Heart	960	C2	End-diastolic volume (biplane, ml)	0.0286954	0.0316545	0.906518	0.0684787	0.00983354	0.364893	0.406078	4.48872e-23	FALSE	FALSE
LIFE-Heart	1122	C2	Ejection Fraction (biplane, %)	-0.0726578	0.0257622	-2.82033	0.0669801	0.0150689	0.00488327	0.00797169	4.48872e-23	TRUE	FALSE
LIFE-Heart	1280	C2	Ejection Fraction (%)	-0.0331483	0.026179	-1.26622	0.0622583	0.00645065	0.205669	0.239138	4.48872e-23	FALSE	FALSE
LIFE-Heart	428	C2	E point-septal separation (mm)	0.0456194	0.0394157	1.15739	0.0635127	0.00778543	0.247784	0.283771	4.48872e-23	FALSE	FALSE
LIFE-Heart	966	C2	End-systolic volume (biplane, ml)	0.06254	0.0292058	2.14135	0.0790738	0.0145719	0.0324997	0.0450067	4.48872e-23	TRUE	FALSE
LIFE-Heart	1100	C2	Flow Propagation Velocity (cm/s)	0.023641	0.0247371	0.955692	0.167603	0.000348603	0.339441	0.378608	4.48872e-23	FALSE	FALSE
LIFE-Heart	4090	C2	Fractional shortening (%)	-0.0643567	0.0132322	-4.86364	0.0957164	0.0149855	1.19595e-06	4.50079e-06	4.48872e-23	TRUE	FALSE
LIFE-Heart	965	C2	Left ventricular mass (g)	0.0713537	0.0313559	2.2756	0.0796464	0.025482	0.0230922	0.0331908	4.48872e-23	TRUE	FALSE
LIFE-Heart	2418	C2	Left ventricular function	0.122198	0.0180908	6.75473	0.0805466	0.0283298	1.78925e-11	2.75656e-10	4.48872e-23	TRUE	FALSE
LIFE-Heart	5242	C2	Left ventricular internal diameter end diastole	0.0642396	0.012159	5.28328	0.087201	0.0156386	1.3204e-07	6.1786e-07	4.48872e-23	TRUE	FALSE
LIFE-Heart	4101	C2	Left ventricular internal diameter end systole	0.0958954	0.0135612	7.07129	0.0991643	0.02828	1.79752e-12	4.63244e-11	4.48872e-23	TRUE	FALSE
LIFE-Heart	4595	C2	Back wall (M-mode, mm)	0.0512859	0.0131522	3.89943	0.0866948	0.0203545	9.78023e-05	0.000206054	4.48872e-23	TRUE	FALSE
LIFE-Heart	1302	C2	Pulmonary venous flow diastolic (cm/s)	0.0782411	0.0233395	3.3523	0.141366	0.0100531	0.000824734	0.00150035	4.48872e-23	TRUE	FALSE
LIFE-Heart	1302	C2	Pulmonary venous flow systolic (cm/s)	-0.0396583	0.0230088	-1.72361	0.137055	0.00248677	0.0850188	0.108586	4.48872e-23	FALSE	FALSE
LIFE-Heart	5347	C2	Septum (mm)	0.0522509	0.0120042	4.35272	0.0848606	0.0194601	1.36974e-05	3.71034e-05	4.48872e-23	TRUE	FALSE
LIFE-Heart	2359	C2	Tricuspid annular plane systolic excursion (mm)	-0.110886	0.0169751	-6.53226	0.0684237	0.0159405	7.92051e-11	8.48872e-10	4.48872e-23	TRUE	FALSE
LIFE-Heart	5722	C2	NT-proBNP (pg/ml)	0.140877	0.0132253	10.6521	0.0989738	0.0365257	3.00368e-26	1.48082e-23	4.48872e-23	TRUE	TRUE
LIFE-Adult	8928	C2	NT-proBNP (pg/ml)	0.108679	0.0160476	6.7723	0.138233	0.0116265	1.34768e-11	6.24831e-11	1.38617e-25	TRUE	TRUE
LIFE-Heart	3003	C2	Number of plaques	0.0488348	0.0120201	4.06276	0.110094	0.0253673	4.97446e-05	0.00011568	4.48872e-23	TRUE	TRUE
LIFE-Adult	8589	C2	Number of plaques	0.0527114	0.00959609	5.49301	0.135207	0.0385886	4.06457e-08	8.75886e-08	1.38617e-25	TRUE	TRUE
LIFE-Heart	3065	C2	Peripheral artery disease	0.206304	0.0497468	4.14709	0.113728	0.0138951	3.45925e-05	8.48462e-05	4.48872e-23	TRUE	TRUE
LIFE-Adult	8139	C2	Peripheral artery disease	0.152145	0.0408367	3.72569	0.13714	0.00538528	0.000196099	0.000250027	1.38617e-25	TRUE	TRUE
LIFE-Heart	5727	C2	Main stem stenosis	0.112204	0.0424583	2.64267	0.0821971	0.00349053	0.00824789	0.0128678	4.48872e-23	TRUE	FALSE
LIFE-Heart	5618	C2	CAD score	-0.00686494	0.0263517	-0.260512	0.0797964	0.00637552	0.794479	0.81261	4.48872e-23	FALSE	FALSE
LIFE-Heart	5561	C2	Valvular disease	0.316014	0.0515196	6.13387	0.0879064	0.00774912	9.17007e-10	7.41122e-09	4.48872e-23	TRUE	FALSE
LIFE-Heart	3003	C2	Any plaques	0.091463	0.033037	2.7685	0.107466	0.0158231	0.00566621	0.00918895	4.48872e-23	TRUE	TRUE
LIFE-Adult	8589	C2	Any plaques	0.0770158	0.0198655	3.87687	0.133682	0.0314113	0.000106601	0.000139401	1.38617e-25	TRUE	TRUE
LIFE-Heart	3005	C20:1	Ankle brachial index	-0.0110248	0.0114124	-0.966034	0.0355924	0.000408098	0.334105	0.621738	8.02598e-07	FALSE	FALSE
LIFE-Adult	8106	C20:1	Ankle brachial index	-0.0129873	0.010096	-1.28638	0.0128159	8.24018e-05	0.198348	0.433532	0.00202425	FALSE	FALSE
LIFE-Adult	8010	C20:1	Brachial-ankle pulse wave velocity	0.00518408	0.0117	0.443083	0.0135809	0.00423443	0.657718	0.824843	0.00202425	FALSE	FALSE
LIFE-Adult	3496	C20:1	Brachial-femoral pulse wave velocity	-0.00552028	0.0142627	-0.387042	0.020581	0.000187859	0.698749	0.84704	0.00202425	FALSE	FALSE
LIFE-Heart	5618	C20:1	Number of vessel disease (50% stenosis)	-0.00597574	0.010979	-0.544291	0.0143043	0.000411748	0.586263	0.857649	8.02598e-07	FALSE	FALSE
LIFE-Adult	7667	C20:1	carotid-femoral pulse wave velocity	-0.00353015	0.0093104	-0.379162	0.0128603	0.000299497	0.704578	0.84704	0.00202425	FALSE	FALSE
LIFE-Heart	2934	C20:1	Carotid intima media thickness	0.0180622	0.0156856	1.15152	0.0355855	0.00489747	0.249614	0.565632	8.02598e-07	FALSE	FALSE
LIFE-Adult	8664	C20:1	Carotid intima media thickness	0.00306594	0.0106915	0.286764	0.0143864	0.00362982	0.7743	0.890736	0.00202425	FALSE	FALSE
LIFE-Heart	4611	C20:1	Aortic bulb (mm)	0.0129214	0.0126728	1.01962	0.0181739	0.00337432	0.307963	0.599337	8.02598e-07	FALSE	FALSE
LIFE-Heart	1513	C20:1	Deceleration time (ms)	-0.012664	0.0192508	-0.657841	0.0562098	3.03901e-05	0.510741	0.79734	8.02598e-07	FALSE	FALSE
LIFE-Heart	960	C20:1	End-diastolic volume (biplane, ml)	0.0896312	0.030844	2.90595	0.024872	0.00931141	0.00374704	0.0267724	8.02598e-07	TRUE	FALSE
LIFE-Heart	1122	C20:1	Ejection Fraction (biplane, %)	-0.0374024	0.0251497	-1.48719	0.0184237	0.00228849	0.137249	0.434658	8.02598e-07	FALSE	FALSE
LIFE-Heart	1280	C20:1	Ejection Fraction (%)	-0.0537458	0.0260507	-2.06312	0.0130226	0.00309576	0.0393051	0.18813	8.02598e-07	FALSE	FALSE
LIFE-Heart	428	C20:1	E point-septal separation (mm)	0.102382	0.039572	2.58724	0.0329045	0.0179691	0.0100172	0.065777	8.02598e-07	FALSE	FALSE
LIFE-Heart	966	C20:1	End-systolic volume (biplane, ml)	0.0965763	0.0285837	3.37872	0.0299617	0.0153684	0.00075787	0.00574815	8.02598e-07	TRUE	FALSE
LIFE-Heart	1100	C20:1	Flow Propagation Velocity (cm/s)	0.0128347	0.0216124	0.593857	0.063914	0.000164818	0.552732	0.833059	8.02598e-07	FALSE	FALSE
LIFE-Heart	4090	C20:1	Fractional shortening (%)	-0.0287984	0.0125824	-2.28879	0.0217139	0.00317133	0.0221428	0.122656	8.02598e-07	FALSE	FALSE
LIFE-Heart	965	C20:1	Left ventricular mass (g)	0.0500399	0.030899	1.61947	0.0182152	0.00488577	0.10568	0.361806	8.02598e-07	FALSE	FALSE
LIFE-Heart	2418	C20:1	Left ventricular function	-0.0279379	0.0184088	-1.51764	0.00136795	0.00069481	0.129236	0.416428	8.02598e-07	FALSE	FALSE
LIFE-Heart	5242	C20:1	Left ventricular internal diameter end diastole	0.0150125	0.0116013	1.29404	0.0155329	0.00203136	0.195709	0.513623	8.02598e-07	FALSE	FALSE
LIFE-Heart	4101	C20:1	Left ventricular internal diameter end systole	0.0339362	0.012963	2.61792	0.0229078	0.0050358	0.00887944	0.0599666	8.02598e-07	FALSE	FALSE
LIFE-Heart	4595	C20:1	Back wall (M-mode, mm)	0.0321228	0.0123895	2.59274	0.0215616	0.00595226	0.00955185	0.063636	8.02598e-07	FALSE	FALSE
LIFE-Heart	1302	C20:1	Pulmonary venous flow diastolic (cm/s)	0.0429224	0.0206667	2.07688	0.0586023	0.00358785	0.0380107	0.185537	8.02598e-07	FALSE	FALSE
LIFE-Heart	1302	C20:1	Pulmonary venous flow systolic (cm/s)	0.0167275	0.0203376	0.822493	0.0555402	0.000202959	0.410949	0.688572	8.02598e-07	FALSE	FALSE
LIFE-Heart	5347	C20:1	Septum (mm)	0.0127984	0.011454	1.11737	0.0162005	0.00253649	0.263885	0.565632	8.02598e-07	FALSE	FALSE
LIFE-Heart	2359	C20:1	Tricuspid annular plane systolic excursion (mm)	-0.0303648	0.0164864	-1.8418	0.00988061	0.00136078	0.0656305	0.258847	8.02598e-07	FALSE	FALSE
LIFE-Heart	5722	C20:1	NT-proBNP (pg/ml)	0.046968	0.012724	3.69131	0.0173392	0.00279817	0.000225188	0.00198246	8.02598e-07	TRUE	TRUE
LIFE-Adult	8928	C20:1	NT-proBNP (pg/ml)	0.0626283	0.0154733	4.0475	0.0153482	0.00273868	5.22045e-05	0.00175296	0.00202425	TRUE	TRUE
LIFE-Heart	3003	C20:1	Number of plaques	0.0083789	0.0110876	0.755703	0.0335335	0.00295707	0.449887	0.727194	8.02598e-07	FALSE	FALSE
LIFE-Adult	8589	C20:1	Number of plaques	0.0129149	0.00924296	1.39727	0.0146477	0.00427794	0.162367	0.394368	0.00202425	FALSE	FALSE
LIFE-Heart	3065	C20:1	Peripheral artery disease	0.0499401	0.0460244	1.08508	0.0348649	0.000875886	0.277973	0.579417	8.02598e-07	FALSE	FALSE
LIFE-Adult	8139	C20:1	Peripheral artery disease	0.0557927	0.0394111	1.41566	0.0132148	0.000556281	0.156914	0.39357	0.00202425	FALSE	FALSE
LIFE-Heart	5727	C20:1	Main stem stenosis	0.0560759	0.0405145	1.3841	0.0152837	0.000831979	0.166383	0.467511	8.02598e-07	FALSE	FALSE
LIFE-Heart	5618	C20:1	CAD score	-0.0412374	0.0252135	-1.63553	0.0147227	3.5819e-06	0.101994	0.353721	8.02598e-07	FALSE	FALSE
LIFE-Heart	5561	C20:1	Valvular disease	0.141702	0.0493099	2.87371	0.0168865	0.00164699	0.00407225	0.0286803	8.02598e-07	TRUE	FALSE
LIFE-Heart	3003	C20:1	Any plaques	0.00583508	0.0304317	0.191743	0.0333606	0.00156838	0.847956	0.950097	8.02598e-07	FALSE	FALSE
LIFE-Adult	8589	C20:1	Any plaques	0.00526381	0.0191197	0.275308	0.014432	0.00283868	0.783086	0.894121	0.00202425	FALSE	FALSE
LIFE-Heart	3005	C20:2	Ankle brachial index	-0.00910907	0.0111827	-0.81457	0.0126498	0.000321792	0.415383	0.844046	3.24958e-05	FALSE	FALSE
LIFE-Adult	8106	C20:2	Ankle brachial index	-0.0190011	0.00979616	-1.93964	0.00624373	0.000196001	0.0524578	0.422423	0.0364606	FALSE	FALSE
LIFE-Adult	8010	C20:2	Brachial-ankle pulse wave velocity	0.000309176	0.0113836	0.0271598	0.00571778	0.00164744	0.978333	0.984769	0.0364606	FALSE	FALSE
LIFE-Adult	3496	C20:2	Brachial-femoral pulse wave velocity	-0.0152116	0.01408	-1.08037	0.0113357	3.77202e-05	0.280051	0.525743	0.0364606	FALSE	FALSE
LIFE-Heart	5618	C20:2	Number of vessel disease (50% stenosis)	-0.00943071	0.0105695	-0.892261	0.00722784	2.09791e-06	0.372292	0.838921	3.24958e-05	FALSE	FALSE
LIFE-Adult	7667	C20:2	carotid-femoral pulse wave velocity	0.00146298	0.00909282	0.160894	0.0057935	0.000233261	0.872181	0.932032	0.0364606	FALSE	FALSE
LIFE-Heart	2934	C20:2	Carotid intima media thickness	0.00361392	0.0153628	0.235238	0.0122539	0.000799174	0.814041	0.960846	3.24958e-05	FALSE	FALSE
LIFE-Adult	8664	C20:2	Carotid intima media thickness	-0.017841	0.0104109	-1.71368	0.00579578	0.000343495	0.0866225	0.446608	0.0364606	FALSE	FALSE
LIFE-Heart	4611	C20:2	Aortic bulb (mm)	0.00616028	0.0121437	0.507282	0.00609451	0.00061861	0.611981	0.943397	3.24958e-05	FALSE	FALSE
LIFE-Heart	1513	C20:2	Deceleration time (ms)	-0.0135329	0.0196777	-0.687726	0.00855435	0.000248372	0.491732	0.880991	3.24958e-05	FALSE	FALSE
LIFE-Heart	960	C20:2	End-diastolic volume (biplane, ml)	-0.0108368	0.028975	-0.374007	0.022525	9.65611e-06	0.708483	0.953824	3.24958e-05	FALSE	FALSE
LIFE-Heart	1122	C20:2	Ejection Fraction (biplane, %)	-0.0493848	0.0232594	-2.12322	0.0264537	0.00470469	0.0339573	0.218954	3.24958e-05	FALSE	FALSE
LIFE-Heart	1280	C20:2	Ejection Fraction (%)	-0.0137216	0.0244353	-0.561549	0.00399896	0.000233437	0.574523	0.93171	3.24958e-05	FALSE	FALSE
LIFE-Heart	428	C20:2	E point-septal separation (mm)	0.119373	0.0337454	3.53747	0.0499854	0.0399018	0.000450048	0.0170672	3.24958e-05	TRUE	FALSE
LIFE-Heart	966	C20:2	End-systolic volume (biplane, ml)	0.000107786	0.0270747	0.00398108	0.0207608	0.000251404	0.996824	0.99885	3.24958e-05	FALSE	FALSE
LIFE-Heart	1100	C20:2	Flow Propagation Velocity (cm/s)	0.0129624	0.0226074	0.57337	0.00730529	0.000101681	0.566513	0.924805	3.24958e-05	FALSE	FALSE
LIFE-Heart	4090	C20:2	Fractional shortening (%)	-0.01118	0.0120467	-0.928059	0.00775928	0.000779509	0.353432	0.818038	3.24958e-05	FALSE	FALSE
LIFE-Heart	965	C20:2	Left ventricular mass (g)	0.0131787	0.028606	0.460697	0.0143223	0.00171338	0.645122	0.953824	3.24958e-05	FALSE	FALSE
LIFE-Heart	2418	C20:2	Left ventricular function	0.0254446	0.0174336	1.45952	0.00464835	0.000782851	0.144553	0.505425	3.24958e-05	FALSE	FALSE
LIFE-Heart	5242	C20:2	Left ventricular internal diameter end diastole	0.00236917	0.0111584	0.212321	0.00715351	0.000470823	0.831865	0.960846	3.24958e-05	FALSE	FALSE
LIFE-Heart	4101	C20:2	Left ventricular internal diameter end systole	0.0113131	0.0123653	0.914904	0.00596448	0.00106407	0.360296	0.830027	3.24958e-05	FALSE	FALSE
LIFE-Heart	4595	C20:2	Back wall (M-mode, mm)	-0.00182017	0.011936	-0.152495	0.00560501	0.000306576	0.878803	0.968119	3.24958e-05	FALSE	FALSE
LIFE-Heart	1302	C20:2	Pulmonary venous flow diastolic (cm/s)	0.00376226	0.0210934	0.178362	0.00472786	5.77406e-05	0.858466	0.960846	3.24958e-05	FALSE	FALSE
LIFE-Heart	1302	C20:2	Pulmonary venous flow systolic (cm/s)	-0.000624526	0.0207508	-0.0300965	0.00508144	1.00023e-05	0.975995	0.996202	3.24958e-05	FALSE	FALSE
LIFE-Heart	5347	C20:2	Septum (mm)	-0.00380349	0.0110355	-0.344658	0.00746669	0.00023476	0.730365	0.953824	3.24958e-05	FALSE	FALSE
LIFE-Heart	2359	C20:2	Tricuspid annular plane systolic excursion (mm)	-0.0207677	0.0155267	-1.33754	0.00542143	0.000527037	0.181175	0.599458	3.24958e-05	FALSE	FALSE
LIFE-Heart	5722	C20:2	NT-proBNP (pg/ml)	0.0316169	0.0122748	2.57576	0.00831185	0.000330783	0.0100269	0.122676	3.24958e-05	FALSE	FALSE
LIFE-Adult	8928	C20:2	NT-proBNP (pg/ml)	0.0203526	0.0150615	1.3513	0.00616127	0.000295716	0.176635	0.48386	0.0364606	FALSE	FALSE
LIFE-Heart	3003	C20:2	Number of plaques	0.00806198	0.0107926	0.746993	0.0108607	0.00121305	0.455127	0.86299	3.24958e-05	FALSE	FALSE
LIFE-Adult	8589	C20:2	Number of plaques	-0.00988625	0.00900387	-1.098	0.00558709	0.000380337	0.272235	0.52065	0.0364606	FALSE	FALSE
LIFE-Heart	3065	C20:2	Peripheral artery disease	0.0203105	0.0450427	0.450918	0.0129731	0.000243879	0.652081	0.953824	3.24958e-05	FALSE	FALSE
LIFE-Adult	8139	C20:2	Peripheral artery disease	0.0276224	0.0382413	0.722319	0.0058511	0.0001392	0.470119	0.666002	0.0364606	FALSE	FALSE
LIFE-Heart	5727	C20:2	Main stem stenosis	0.0742486	0.0390575	1.90101	0.00785431	0.000633724	0.0573515	0.280035	3.24958e-05	FALSE	FALSE
LIFE-Heart	5618	C20:2	CAD score	-0.0241394	0.0242778	-0.9943	0.00726196	2.13265e-05	0.32012	0.797239	3.24958e-05	FALSE	FALSE
LIFE-Heart	5561	C20:2	Valvular disease	0.0457081	0.0475752	0.960755	0.00820553	4.58301e-05	0.336717	0.805833	3.24958e-05	FALSE	FALSE
LIFE-Heart	3003	C20:2	Any plaques	-0.0293625	0.0296174	-0.991393	0.0110014	6.81763e-06	0.321574	0.797239	3.24958e-05	FALSE	FALSE
LIFE-Adult	8589	C20:2	Any plaques	-0.0148224	0.0186237	-0.795891	0.00552072	0.000454127	0.426118	0.636164	0.0364606	FALSE	FALSE
LIFE-Heart	3005	C20:3	Ankle brachial index	-0.0109576	0.0108813	-1.00702	0.0141895	0.000504736	0.314008	0.810503	0.00304211	FALSE	FALSE
LIFE-Adult	8106	C20:3	Ankle brachial index	0.00082961	0.0089381	0.0928173	0.00605363	5.20457e-05	0.926051	0.997783	0.0591414	FALSE	FALSE
LIFE-Adult	8010	C20:3	Brachial-ankle pulse wave velocity	0.00821693	0.0103381	0.794823	0.00514674	0.00225942	0.42674	0.882314	0.0591414	FALSE	FALSE
LIFE-Adult	3496	C20:3	Brachial-femoral pulse wave velocity	-0.0216367	0.0137912	-1.56888	0.00884277	0.000112166	0.116767	0.459653	0.0591414	FALSE	FALSE
LIFE-Heart	5618	C20:3	Number of vessel disease (50% stenosis)	0.00538982	0.00971515	0.554785	0.00736029	0.000330807	0.579064	0.940851	0.00304211	FALSE	FALSE
LIFE-Adult	7667	C20:3	carotid-femoral pulse wave velocity	0.00406943	0.00828562	0.491144	0.00530102	0.000352775	0.623339	0.953708	0.0591414	FALSE	FALSE
LIFE-Heart	2934	C20:3	Carotid intima media thickness	0.0238764	0.014975	1.59441	0.0168727	0.00147748	0.110952	0.43561	0.00304211	FALSE	FALSE
LIFE-Adult	8664	C20:3	Carotid intima media thickness	-0.0146175	0.00942684	-1.55063	0.00543691	0.000609893	0.121027	0.462928	0.0591414	FALSE	FALSE
LIFE-Heart	4611	C20:3	Aortic bulb (mm)	0.006317	0.0115265	0.548041	0.00822478	0.000796525	0.58369	0.940851	0.00304211	FALSE	FALSE
LIFE-Heart	1513	C20:3	Deceleration time (ms)	-0.0519767	0.0187772	-2.76808	0.019958	0.00416054	0.0057083	0.0370288	0.00304211	TRUE	FALSE
LIFE-Heart	960	C20:3	End-diastolic volume (biplane, ml)	-0.0262881	0.0293489	-0.895709	0.0206105	3.83855e-05	0.370637	0.839111	0.00304211	FALSE	FALSE
LIFE-Heart	1122	C20:3	Ejection Fraction (biplane, %)	0.0150322	0.0232019	0.647884	0.0148643	7.32638e-05	0.517194	0.940851	0.00304211	FALSE	FALSE
LIFE-Heart	1280	C20:3	Ejection Fraction (%)	0.0167746	0.023867	0.702836	0.0206508	0.000532892	0.482288	0.924398	0.00304211	FALSE	FALSE
LIFE-Heart	428	C20:3	E point-septal separation (mm)	-0.0114643	0.0351863	-0.325817	0.0176172	0.000243671	0.744728	0.95657	0.00304211	FALSE	FALSE
LIFE-Heart	966	C20:3	End-systolic volume (biplane, ml)	-0.0219015	0.0273608	-0.80047	0.0169224	6.91382e-05	0.423639	0.879858	0.00304211	FALSE	FALSE
LIFE-Heart	1100	C20:3	Flow Propagation Velocity (cm/s)	0.0375473	0.0215473	1.74256	0.0143758	0.0015085	0.0816948	0.344235	0.00304211	FALSE	FALSE
LIFE-Heart	4090	C20:3	Fractional shortening (%)	0.00444747	0.0113876	0.390555	0.00870702	3.43971e-05	0.696147	0.942858	0.00304211	FALSE	FALSE
LIFE-Heart	965	C20:3	Left ventricular mass (g)	-0.0264823	0.0292809	-0.904424	0.0214518	2.5181e-05	0.366	0.839111	0.00304211	FALSE	FALSE
LIFE-Heart	2418	C20:3	Left ventricular function	0.00553592	0.0148669	0.372365	0.000857635	5.61208e-06	0.709654	0.948129	0.00304211	FALSE	FALSE
LIFE-Heart	5242	C20:3	Left ventricular internal diameter end diastole	0.0109768	0.0103776	1.05774	0.0075379	0.000662468	0.290224	0.78186	0.00304211	FALSE	FALSE
LIFE-Heart	4101	C20:3	Left ventricular internal diameter end systole	0.0150954	0.0117249	1.28747	0.00891218	0.00100045	0.198005	0.617824	0.00304211	FALSE	FALSE
LIFE-Heart	4595	C20:3	Back wall (M-mode, mm)	0.00284245	0.0112538	0.252576	0.00744408	0.000519359	0.800607	0.957328	0.00304211	FALSE	FALSE
LIFE-Heart	1302	C20:3	Pulmonary venous flow diastolic (cm/s)	0.0401859	0.019971	2.01222	0.0212583	0.0035556	0.0444054	0.22804	0.00304211	FALSE	FALSE
LIFE-Heart	1302	C20:3	Pulmonary venous flow systolic (cm/s)	-0.00598319	0.0196555	-0.304403	0.0189395	9.45266e-05	0.76087	0.957328	0.00304211	FALSE	FALSE
LIFE-Heart	5347	C20:3	Septum (mm)	0.00289153	0.0102288	0.282685	0.00731207	0.000352736	0.777429	0.957328	0.00304211	FALSE	FALSE
LIFE-Heart	2359	C20:3	Tricuspid annular plane systolic excursion (mm)	-0.00659106	0.0144088	-0.457435	0.00260317	3.74719e-05	0.647401	0.940851	0.00304211	FALSE	FALSE
LIFE-Heart	5722	C20:3	NT-proBNP (pg/ml)	0.0368565	0.0113044	3.26035	0.00843831	0.00062008	0.00111927	0.013795	0.00304211	TRUE	FALSE
LIFE-Adult	8928	C20:3	NT-proBNP (pg/ml)	0.0271183	0.0136787	1.98251	0.00526082	0.000731565	0.0474526	0.347617	0.0591414	FALSE	FALSE
LIFE-Heart	3003	C20:3	Number of plaques	0.000148611	0.0105885	0.0140351	0.0139691	0.000294715	0.988803	0.997395	0.00304211	FALSE	FALSE
LIFE-Adult	8589	C20:3	Number of plaques	0.00124774	0.00815353	0.153031	0.00488316	0.00122369	0.878378	0.997783	0.0591414	FALSE	FALSE
LIFE-Heart	3065	C20:3	Peripheral artery disease	-0.00839474	0.0439916	-0.190826	0.0132303	1.34721e-05	0.848675	0.961912	0.00304211	FALSE	FALSE
LIFE-Adult	8139	C20:3	Peripheral artery disease	0.00115604	0.0349049	0.0331198	0.00557101	3.64022e-05	0.97358	0.997783	0.0591414	FALSE	FALSE
LIFE-Heart	5727	C20:3	Main stem stenosis	-0.00282258	0.0359943	-0.0784174	0.00660065	6.15454e-06	0.937499	0.981289	0.00304211	FALSE	FALSE
LIFE-Heart	5618	C20:3	CAD score	0.0126344	0.0223159	0.56616	0.00736255	0.000252792	0.571307	0.940851	0.00304211	FALSE	FALSE
LIFE-Heart	5561	C20:3	Valvular disease	0.0458165	0.0438862	1.04398	0.00703228	0.000135165	0.296538	0.791934	0.00304211	FALSE	FALSE
LIFE-Heart	3003	C20:3	Any plaques	0.0251453	0.0290557	0.865416	0.0142163	0.000793852	0.38688	0.859357	0.00304211	FALSE	FALSE
LIFE-Adult	8589	C20:3	Any plaques	0.0149319	0.0168635	0.885453	0.00497145	0.00161915	0.375937	0.809197	0.0591414	FALSE	FALSE
LIFE-Heart	2997	C3	Ankle brachial index	-0.0255968	0.0132935	-1.9255	0.12718	0.000849287	0.0542613	0.0922442	1.02342e-30	FALSE	FALSE
LIFE-Adult	8098	C3	Ankle brachial index	-0.0158198	0.0116445	-1.35856	0.170685	0.000289062	0.174323	0.229927	7.60307e-56	FALSE	FALSE
LIFE-Adult	8002	C3	Brachial-ankle pulse wave velocity	0.0348586	0.0134853	2.58493	0.173513	0.0320607	0.00975739	0.0155508	7.60307e-56	TRUE	FALSE
LIFE-Adult	3496	C3	Brachial-femoral pulse wave velocity	0.0360652	0.0162668	2.2171	0.207033	0.00600757	0.0266808	0.0400212	7.60307e-56	TRUE	FALSE
LIFE-Heart	5607	C3	Number of vessel disease (50% stenosis)	0.0165794	0.0125931	1.31655	0.0993347	0.00651804	0.188044	0.26041	1.02342e-30	FALSE	FALSE
LIFE-Adult	7662	C3	carotid-femoral pulse wave velocity	0.0147017	0.0107864	1.36299	0.170217	0.00400545	0.172926	0.229927	7.60307e-56	FALSE	FALSE
LIFE-Heart	2925	C3	Carotid intima media thickness	-0.0318161	0.0180925	-1.75853	0.130542	0.00226634	0.0787626	0.125258	1.02342e-30	FALSE	FALSE
LIFE-Adult	8656	C3	Carotid intima media thickness	-0.00608202	0.0123662	-0.491824	0.167666	0.0149797	0.622856	0.666412	7.60307e-56	FALSE	FALSE
LIFE-Heart	4602	C3	Aortic bulb (mm)	0.0151061	0.0145766	1.03633	0.104219	0.0152682	0.300104	0.389345	1.02342e-30	FALSE	FALSE
LIFE-Heart	1513	C3	Deceleration time (ms)	0.0113989	0.0228918	0.497945	0.157731	0.000960836	0.618596	0.691537	1.02342e-30	FALSE	FALSE
LIFE-Heart	950	C3	End-diastolic volume (biplane, ml)	-0.0266745	0.0352888	-0.755891	0.106254	0.00998523	0.449906	0.539668	1.02342e-30	FALSE	FALSE
LIFE-Heart	1113	C3	Ejection Fraction (biplane, %)	-0.00520704	0.0290469	-0.179263	0.0978309	0.00169648	0.857764	0.884682	1.02342e-30	FALSE	FALSE
LIFE-Heart	1272	C3	Ejection Fraction (%)	-0.000983043	0.0292898	-0.0335627	0.101028	0.00106704	0.973231	0.983203	1.02342e-30	FALSE	FALSE
LIFE-Heart	422	C3	E point-septal separation (mm)	-0.0374368	0.0478997	-0.781566	0.0733131	9.51199e-05	0.434926	0.525536	1.02342e-30	FALSE	FALSE
LIFE-Heart	957	C3	End-systolic volume (biplane, ml)	-0.00877681	0.0327673	-0.267853	0.105606	0.00562329	0.788871	0.825719	1.02342e-30	FALSE	FALSE
LIFE-Heart	1100	C3	Flow Propagation Velocity (cm/s)	0.0460444	0.0263616	1.74665	0.154222	0.00183818	0.0809821	0.128374	1.02342e-30	FALSE	FALSE
LIFE-Heart	4081	C3	Fractional shortening (%)	-0.0124316	0.0144424	-0.860774	0.110616	0.00429622	0.389413	0.479952	1.02342e-30	FALSE	FALSE
LIFE-Heart	957	C3	Left ventricular mass (g)	0.0072825	0.0354483	0.20544	0.111117	0.0281797	0.837273	0.870834	1.02342e-30	FALSE	FALSE
LIFE-Heart	2416	C3	Left ventricular function	0.0899354	0.0207013	4.34443	0.0799087	0.00699074	1.45452e-05	7.62848e-05	1.02342e-30	TRUE	FALSE
LIFE-Heart	5232	C3	Left ventricular internal diameter end diastole	0.00531643	0.0133762	0.397453	0.100809	0.010987	0.69105	0.749674	1.02342e-30	FALSE	FALSE
LIFE-Heart	4092	C3	Left ventricular internal diameter end systole	0.0151842	0.0148343	1.02358	0.10971	0.0113269	0.306093	0.394005	1.02342e-30	FALSE	FALSE
LIFE-Heart	4586	C3	Back wall (M-mode, mm)	-0.00880634	0.0143167	-0.61511	0.103903	0.01135	0.538513	0.617411	1.02342e-30	FALSE	FALSE
LIFE-Heart	1302	C3	Pulmonary venous flow diastolic (cm/s)	0.0423482	0.0245235	1.72684	0.16579	0.00261776	0.0844359	0.131731	1.02342e-30	FALSE	FALSE
LIFE-Heart	1302	C3	Pulmonary venous flow systolic (cm/s)	0.0479601	0.0241275	1.98778	0.166868	0.00066118	0.0470481	0.0831351	1.02342e-30	FALSE	FALSE
LIFE-Heart	5337	C3	Septum (mm)	-0.00521719	0.0131643	-0.396313	0.100499	0.00978649	0.69189	0.749674	1.02342e-30	FALSE	FALSE
LIFE-Heart	2351	C3	Tricuspid annular plane systolic excursion (mm)	-0.0178604	0.0191244	-0.933906	0.0775961	5.70219e-06	0.350449	0.439767	1.02342e-30	FALSE	FALSE
LIFE-Heart	5711	C3	NT-proBNP (pg/ml)	-0.00595862	0.0146304	-0.407277	0.0973514	6.71124e-07	0.68382	0.744201	1.02342e-30	FALSE	FALSE
LIFE-Adult	8920	C3	NT-proBNP (pg/ml)	-0.0602527	0.0178526	-3.37501	0.170092	0.00236381	0.000741282	0.00136646	7.60307e-56	TRUE	FALSE
LIFE-Heart	2996	C3	Number of plaques	0.0118676	0.0128413	0.924176	0.123246	0.00702772	0.35547	0.443662	1.02342e-30	FALSE	FALSE
LIFE-Adult	8581	C3	Number of plaques	0.00179952	0.0106962	0.168239	0.168843	0.0147397	0.866399	0.866399	7.60307e-56	FALSE	FALSE
LIFE-Heart	3056	C3	Peripheral artery disease	0.149709	0.0535722	2.79452	0.12889	0.00434074	0.00523022	0.0131704	1.02342e-30	TRUE	FALSE
LIFE-Adult	8131	C3	Peripheral artery disease	0.075927	0.045428	1.67137	0.171626	0.00150386	0.0946875	0.131702	7.60307e-56	FALSE	FALSE
LIFE-Heart	5716	C3	Main stem stenosis	0.120646	0.0465438	2.59209	0.0983834	0.00219643	0.00956384	0.022136	1.02342e-30	TRUE	FALSE
LIFE-Heart	5607	C3	CAD score	0.0433365	0.0289347	1.49773	0.0994169	0.00509817	0.134259	0.194675	1.02342e-30	FALSE	FALSE
LIFE-Heart	5550	C3	Valvular disease	0.114636	0.0565762	2.02622	0.100387	0.000266246	0.0427897	0.0781309	1.02342e-30	FALSE	FALSE
LIFE-Heart	2996	C3	Any plaques	0.0178721	0.0352381	0.50718	0.12307	0.00464598	0.612066	0.685792	1.02342e-30	FALSE	FALSE
LIFE-Adult	8581	C3	Any plaques	0.0074104	0.0221128	0.335119	0.168851	0.0140738	0.737544	0.742396	7.60307e-56	FALSE	FALSE
LIFE-Heart	2997	C3DC	Ankle brachial index	-0.0239508	0.0118965	-2.01327	0.0216058	0.00213201	0.0441756	0.183013	0.000261093	FALSE	FALSE
LIFE-Adult	8098	C3DC	Ankle brachial index	-0.00624847	0.0109247	-0.571957	0.0226158	0.000403461	0.567367	0.827462	5.44569e-16	FALSE	FALSE
LIFE-Adult	8002	C3DC	Brachial-ankle pulse wave velocity	0.000116842	0.0126836	0.00921202	0.0218323	0.00642384	0.99265	0.993707	5.44569e-16	FALSE	FALSE
LIFE-Adult	3496	C3DC	Brachial-femoral pulse wave velocity	0.0180759	0.0151716	1.19143	0.0437708	0.0025966	0.233567	0.517908	5.44569e-16	FALSE	FALSE
LIFE-Heart	5607	C3DC	Number of vessel disease (50% stenosis)	0.0177505	0.0115432	1.53774	0.0121095	0.00173937	0.124169	0.304891	0.000261093	FALSE	FALSE
LIFE-Adult	7662	C3DC	carotid-femoral pulse wave velocity	0.0144873	0.0101388	1.4289	0.0222286	0.0015065	0.153074	0.420356	5.44569e-16	FALSE	FALSE
LIFE-Heart	2925	C3DC	Carotid intima media thickness	-0.0249165	0.0165128	-1.50892	0.0236346	0.000418232	0.131428	0.314651	0.000261093	FALSE	FALSE
LIFE-Adult	8656	C3DC	Carotid intima media thickness	-0.0225759	0.0115755	-1.95031	0.0243818	0.00342113	0.0511714	0.260974	5.44569e-16	FALSE	FALSE
LIFE-Heart	4602	C3DC	Aortic bulb (mm)	0.00516843	0.0132527	0.389992	0.0121343	0.000885723	0.696561	0.785823	0.000261093	FALSE	FALSE
LIFE-Heart	1513	C3DC	Deceleration time (ms)	-0.0148122	0.0204768	-0.723366	0.0240805	4.35805e-05	0.469568	0.635981	0.000261093	FALSE	FALSE
LIFE-Heart	950	C3DC	End-diastolic volume (biplane, ml)	-0.00931165	0.0333704	-0.279039	0.0151565	6.07645e-05	0.780277	0.843588	0.000261093	FALSE	FALSE
LIFE-Heart	1113	C3DC	Ejection Fraction (biplane, %)	-0.0370525	0.027193	-1.36258	0.0192054	0.000583674	0.173296	0.357468	0.000261093	FALSE	FALSE
LIFE-Heart	1272	C3DC	Ejection Fraction (%)	-0.0429504	0.0276414	-1.55384	0.00423365	0.000233789	0.120475	0.30303	0.000261093	FALSE	FALSE
LIFE-Heart	422	C3DC	E point-septal separation (mm)	0.0623251	0.0454572	1.37107	-0.00780471	0.00434308	0.171112	0.354446	0.000261093	FALSE	FALSE
LIFE-Heart	957	C3DC	End-systolic volume (biplane, ml)	-0.00632237	0.0309805	-0.204076	0.0144475	5.24569e-05	0.838339	0.881239	0.000261093	FALSE	FALSE
LIFE-Heart	1100	C3DC	Flow Propagation Velocity (cm/s)	0.0186073	0.0233512	0.796845	0.0267346	5.4714e-05	0.425716	0.601369	0.000261093	FALSE	FALSE
LIFE-Heart	4081	C3DC	Fractional shortening (%)	-0.0160989	0.0131064	-1.22833	0.0158592	0.000712858	0.219396	0.411263	0.000261093	FALSE	FALSE
LIFE-Heart	957	C3DC	Left ventricular mass (g)	-0.000339829	0.0331781	-0.0102426	0.00640748	8.90159e-05	0.99183	0.996842	0.000261093	FALSE	FALSE
LIFE-Heart	2416	C3DC	Left ventricular function	0.0428612	0.0194095	2.20826	0.00766748	0.00209349	0.0273204	0.130767	0.000261093	FALSE	FALSE
LIFE-Heart	5232	C3DC	Left ventricular internal diameter end diastole	0.0105304	0.0122106	0.862395	0.0122262	0.000354628	0.38851	0.576944	0.000261093	FALSE	FALSE
LIFE-Heart	4092	C3DC	Left ventricular internal diameter end systole	0.0133321	0.013537	0.984862	0.0146762	0.000534436	0.324751	0.541596	0.000261093	FALSE	FALSE
LIFE-Heart	4586	C3DC	Back wall (M-mode, mm)	0.0261228	0.0130282	2.00509	0.0134908	0.00245982	0.0450121	0.184925	0.000261093	FALSE	FALSE
LIFE-Heart	1302	C3DC	Pulmonary venous flow diastolic (cm/s)	0.0271178	0.0221619	1.22362	0.0249007	0.00146718	0.221319	0.413297	0.000261093	FALSE	FALSE
LIFE-Heart	1302	C3DC	Pulmonary venous flow systolic (cm/s)	-0.0283917	0.0217841	-1.30332	0.0266713	0.000830376	0.192698	0.383064	0.000261093	FALSE	FALSE
LIFE-Heart	5337	C3DC	Septum (mm)	0.00911047	0.0120619	0.75531	0.011783	0.00104697	0.450096	0.625063	0.000261093	FALSE	FALSE
LIFE-Heart	2351	C3DC	Tricuspid annular plane systolic excursion (mm)	-0.0355406	0.017634	-2.01546	0.00806799	0.00200757	0.0439709	0.183013	0.000261093	FALSE	FALSE
LIFE-Heart	5711	C3DC	NT-proBNP (pg/ml)	0.0674649	0.0133628	5.04872	0.0162662	0.0047968	4.58623e-07	0.000226101	0.000261093	TRUE	TRUE
LIFE-Adult	8920	C3DC	NT-proBNP (pg/ml)	0.0838051	0.0167092	5.01551	0.0270355	0.00428941	5.39154e-07	4.58281e-06	5.44569e-16	TRUE	TRUE
LIFE-Heart	2996	C3DC	Number of plaques	0.0207737	0.0116046	1.79012	0.0205636	0.00439207	0.0735357	0.240087	0.000261093	FALSE	FALSE
LIFE-Adult	8581	C3DC	Number of plaques	-0.00386603	0.0100096	-0.386233	0.0232635	0.00351345	0.699334	0.919318	5.44569e-16	FALSE	FALSE
LIFE-Heart	3056	C3DC	Peripheral artery disease	0.0940434	0.0481071	1.95488	0.0224861	0.00231068	0.0506892	0.200186	0.000261093	FALSE	FALSE
LIFE-Adult	8131	C3DC	Peripheral artery disease	-0.0753448	0.0425656	-1.77009	0.0231477	0.000311204	0.0767503	0.31036	5.44569e-16	FALSE	FALSE
LIFE-Heart	5716	C3DC	Main stem stenosis	0.0394958	0.042649	0.926065	0.011852	0.000720591	0.354452	0.556193	0.000261093	FALSE	FALSE
LIFE-Heart	5607	C3DC	CAD score	0.0162458	0.0265284	0.612391	0.0117579	0.000425654	0.540304	0.676429	0.000261093	FALSE	FALSE
LIFE-Heart	5550	C3DC	Valvular disease	0.00364212	0.0519539	0.0701029	0.0119568	0.000206001	0.944114	0.96566	0.000261093	FALSE	FALSE
LIFE-Heart	2996	C3DC	Any plaques	0.00712871	0.0318582	0.223764	0.0195265	0.00143456	0.822956	0.867158	0.000261093	FALSE	FALSE
LIFE-Adult	8581	C3DC	Any plaques	-0.0256256	0.0206917	-1.23845	0.0234213	0.00239149	0.215584	0.499246	5.44569e-16	FALSE	FALSE
LIFE-Heart	3005	C4	Ankle brachial index	0.00079503	0.0138989	0.057201	0.0594348	0.000378853	0.954389	0.974148	1.70079e-15	FALSE	FALSE
LIFE-Adult	8106	C4	Ankle brachial index	-0.0179831	0.0120289	-1.49498	0.0672219	8.69135e-05	0.134958	0.178005	6.13361e-18	FALSE	FALSE
LIFE-Adult	8010	C4	Brachial-ankle pulse wave velocity	0.0306041	0.0139449	2.19464	0.0675256	0.0202391	0.028218	0.0440546	6.13361e-18	TRUE	FALSE
LIFE-Adult	3496	C4	Brachial-femoral pulse wave velocity	0.0163322	0.0170793	0.956255	0.0777579	0.00332907	0.33901	0.414948	6.13361e-18	FALSE	FALSE
LIFE-Heart	5616	C4	Number of vessel disease (50% stenosis)	-0.00867195	0.0131685	-0.658539	0.0382387	0.00217706	0.510219	0.6359	1.70079e-15	FALSE	FALSE
LIFE-Adult	7667	C4	carotid-femoral pulse wave velocity	0.00288789	0.0111461	0.259095	0.0657357	0.00224338	0.795569	0.833713	6.13361e-18	FALSE	FALSE
LIFE-Heart	2934	C4	Carotid intima media thickness	-0.0580551	0.0191661	-3.02904	0.0590991	5.78387e-05	0.00247479	0.00859206	1.70079e-15	TRUE	FALSE
LIFE-Adult	8664	C4	Carotid intima media thickness	-0.0223866	0.0127648	-1.75378	0.0664302	0.00856829	0.0795044	0.108609	6.13361e-18	FALSE	FALSE
LIFE-Heart	4609	C4	Aortic bulb (mm)	0.0267307	0.0152232	1.75591	0.0444802	0.00614606	0.0791698	0.152464	1.70079e-15	FALSE	FALSE
LIFE-Heart	1513	C4	Deceleration time (ms)	0.0729437	0.0242366	3.00965	0.0769025	0.0101971	0.0026592	0.00910405	1.70079e-15	TRUE	FALSE
LIFE-Heart	960	C4	End-diastolic volume (biplane, ml)	-0.0255483	0.0374151	-0.682833	0.0204723	0.00062085	0.49488	0.627188	1.70079e-15	FALSE	FALSE
LIFE-Heart	1122	C4	Ejection Fraction (biplane, %)	-0.0649184	0.0302686	-2.14474	0.0273864	0.00757408	0.0321911	0.0708493	1.70079e-15	FALSE	FALSE
LIFE-Heart	1280	C4	Ejection Fraction (%)	-0.0169889	0.03135	-0.541909	0.0227271	0.00171784	0.587977	0.703574	1.70079e-15	FALSE	FALSE
LIFE-Heart	428	C4	E point-septal separation (mm)	0.0776055	0.0478203	1.62286	0.0270415	0.00849298	0.105387	0.198304	1.70079e-15	FALSE	FALSE
LIFE-Heart	966	C4	End-systolic volume (biplane, ml)	0.000602223	0.0347245	0.0173429	0.024835	0.00114536	0.986167	0.989984	1.70079e-15	FALSE	FALSE
LIFE-Heart	1100	C4	Flow Propagation Velocity (cm/s)	-0.0183113	0.0278357	-0.657835	0.0786703	0.000801669	0.510784	0.6359	1.70079e-15	FALSE	FALSE
LIFE-Heart	4088	C4	Fractional shortening (%)	-0.0440058	0.0150036	-2.93301	0.0480471	0.00577358	0.00337567	0.0110104	1.70079e-15	TRUE	FALSE
LIFE-Heart	965	C4	Left ventricular mass (g)	0.077773	0.0370079	2.10152	0.0346142	0.0158094	0.0358585	0.0782222	1.70079e-15	FALSE	FALSE
LIFE-Heart	2416	C4	Left ventricular function	0.0538968	0.0217373	2.47946	0.0238407	0.00433708	0.0132263	0.0343188	1.70079e-15	TRUE	FALSE
LIFE-Heart	5240	C4	Left ventricular internal diameter end diastole	0.018676	0.0139494	1.33884	0.042579	0.00328788	0.180682	0.295934	1.70079e-15	FALSE	FALSE
LIFE-Heart	4099	C4	Left ventricular internal diameter end systole	0.0528897	0.0154332	3.427	0.0485897	0.00863997	0.000616326	0.0028938	1.70079e-15	TRUE	FALSE
LIFE-Heart	4593	C4	Back wall (M-mode, mm)	0.00627141	0.0149548	0.419359	0.0423076	0.00422431	0.674974	0.788462	1.70079e-15	FALSE	FALSE
LIFE-Heart	1302	C4	Pulmonary venous flow diastolic (cm/s)	-0.00860147	0.0258871	-0.332268	0.0702936	3.80682e-05	0.739741	0.826966	1.70079e-15	FALSE	FALSE
LIFE-Heart	1302	C4	Pulmonary venous flow systolic (cm/s)	-0.0180753	0.0254208	-0.711044	0.0710005	0.000441615	0.477186	0.612637	1.70079e-15	FALSE	FALSE
LIFE-Heart	5345	C4	Septum (mm)	0.0337448	0.0137791	2.44898	0.0428509	0.00802289	0.0143581	0.0368673	1.70079e-15	TRUE	FALSE
LIFE-Heart	2357	C4	Tricuspid annular plane systolic excursion (mm)	-0.059772	0.0196077	-3.0484	0.0254405	0.00340906	0.0023264	0.00831098	1.70079e-15	TRUE	FALSE
LIFE-Heart	5720	C4	NT-proBNP (pg/ml)	0.04665	0.0152787	3.05326	0.041862	0.00483616	0.00227412	0.00818351	1.70079e-15	TRUE	TRUE
LIFE-Adult	8928	C4	NT-proBNP (pg/ml)	0.0498899	0.0184958	2.69736	0.0678529	0.00177977	0.00700227	0.0140626	6.13361e-18	TRUE	TRUE
LIFE-Heart	3003	C4	Number of plaques	0.0190106	0.0134666	1.41168	0.0598465	0.0075037	0.158148	0.267927	1.70079e-15	FALSE	FALSE
LIFE-Adult	8589	C4	Number of plaques	0.00596804	0.0110389	0.540639	0.0665001	0.0113682	0.58877	0.640532	6.13361e-18	FALSE	FALSE
LIFE-Heart	3065	C4	Peripheral artery disease	0.0119864	0.0561377	0.213518	0.0591964	0.000979488	0.830937	0.889379	1.70079e-15	FALSE	FALSE
LIFE-Adult	8139	C4	Peripheral artery disease	0.0835905	0.0469625	1.77994	0.0670245	0.00169069	0.0751227	0.104865	6.13361e-18	FALSE	FALSE
LIFE-Heart	5725	C4	Main stem stenosis	0.0348305	0.0486428	0.716046	0.0403798	0.000576031	0.473992	0.611723	1.70079e-15	FALSE	FALSE
LIFE-Heart	5616	C4	CAD score	-0.0667156	0.0302357	-2.20652	0.0389999	0.000611353	0.0273883	0.0625113	1.70079e-15	FALSE	FALSE
LIFE-Heart	5559	C4	Valvular disease	0.137014	0.0592995	2.31054	0.0408943	0.000993555	0.0208947	0.0502492	1.70079e-15	FALSE	FALSE
LIFE-Heart	3003	C4	Any plaques	0.0566991	0.036956	1.53423	0.0599601	0.00650787	0.125078	0.228384	1.70079e-15	FALSE	FALSE
LIFE-Adult	8589	C4	Any plaques	-0.0023132	0.0228325	-0.101312	0.0664694	0.00942071	0.919305	0.931482	6.13361e-18	FALSE	FALSE
LIFE-Heart	3005	C4OH	Ankle brachial index	-0.0368309	0.0125851	-2.92655	0.0896159	0.0084581	0.00345331	0.00718347	5.91547e-13	TRUE	FALSE
LIFE-Adult	8105	C4OH	Ankle brachial index	-0.0235684	0.0109204	-2.1582	0.0590602	0.00029206	0.0309416	0.0503623	4.63954e-18	FALSE	FALSE
LIFE-Adult	8009	C4OH	Brachial-ankle pulse wave velocity	0.0306165	0.0126776	2.41501	0.0594164	0.0188306	0.0157571	0.0280329	4.63954e-18	TRUE	FALSE
[truncated: 2,694 more rows]

## Sheet: Table_S05
CV-fold	Lambda	AUC	AUC 95%-CI, lower	AUC 95%-CI, upper	Prediction Model
1	0.00408261	0.743685	0.685914	0.801456	Metabolites only
[truncated: 29 more rows]

[truncated: 5 more sheets: Table_S06, Table_S07, Table_S08, Table_S09, Table_S10]
